# Supplementary material for: SZC-6 Promotes Diabetic Wound Healing in Mice by Modulating M1/M2 Macrophage Ratio and Inhibiting MyD88/NF-χB Pathway
Source: Research Square preprint supplement (doi:10.21203/rs.3.rs-6886236/v1), 2025-06-19
Supplement: Supplementary file 1 [file 730550830b3b60f6df079b8f.docx]

**Supporting Information**

**SZC-6 Promotes Diabetic Wound Healing in Mice by Modulating M1/M2 Macrophage Ratio and Inhibiting MyD88/NF-κB Pathway**

**Supplementary Figures and Tables**


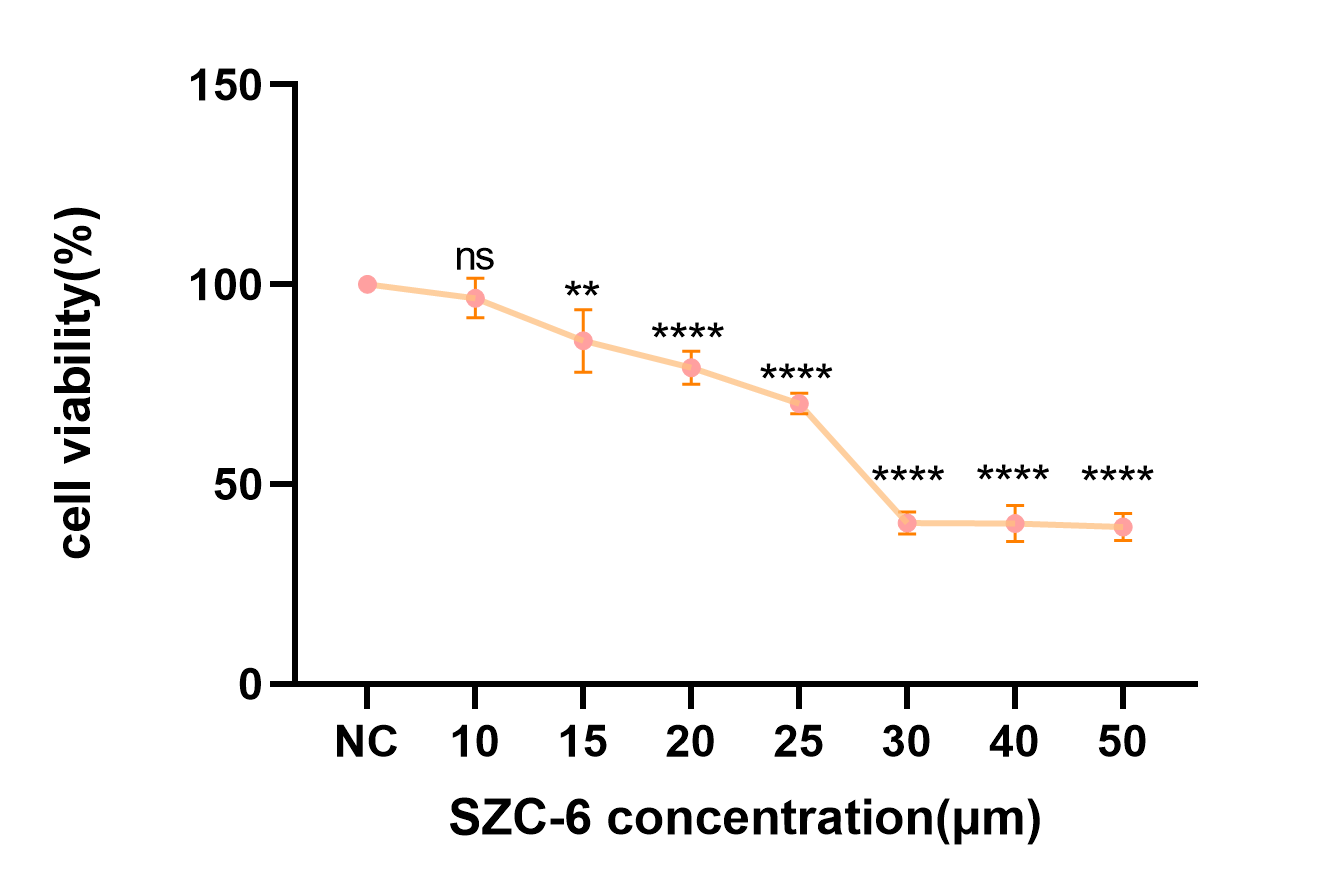


A

**Fig. S1.** Cell viabilities of RAW264.7 cells treated with SZC-6 at different concentrations.


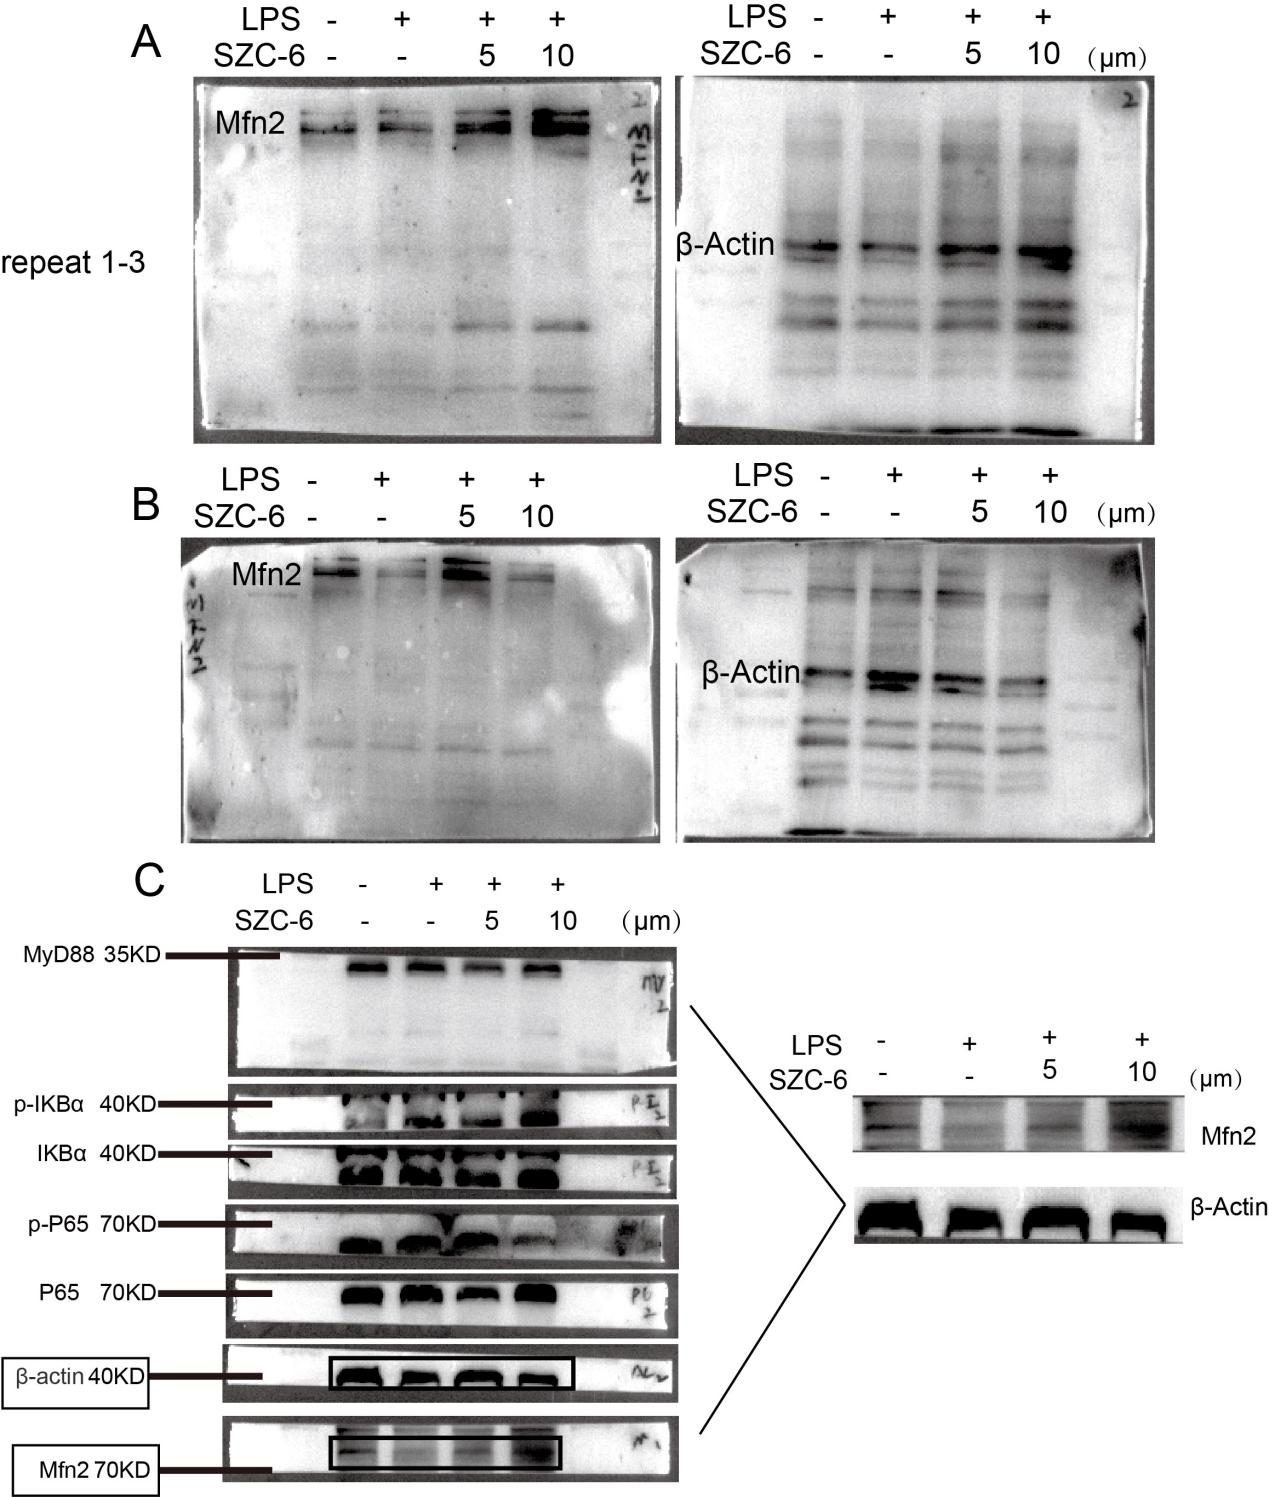


**Fig. S2.** Western blot analysis of β-actin, Mfn2 expression in the RAW264.7 cell(*n* = 3).


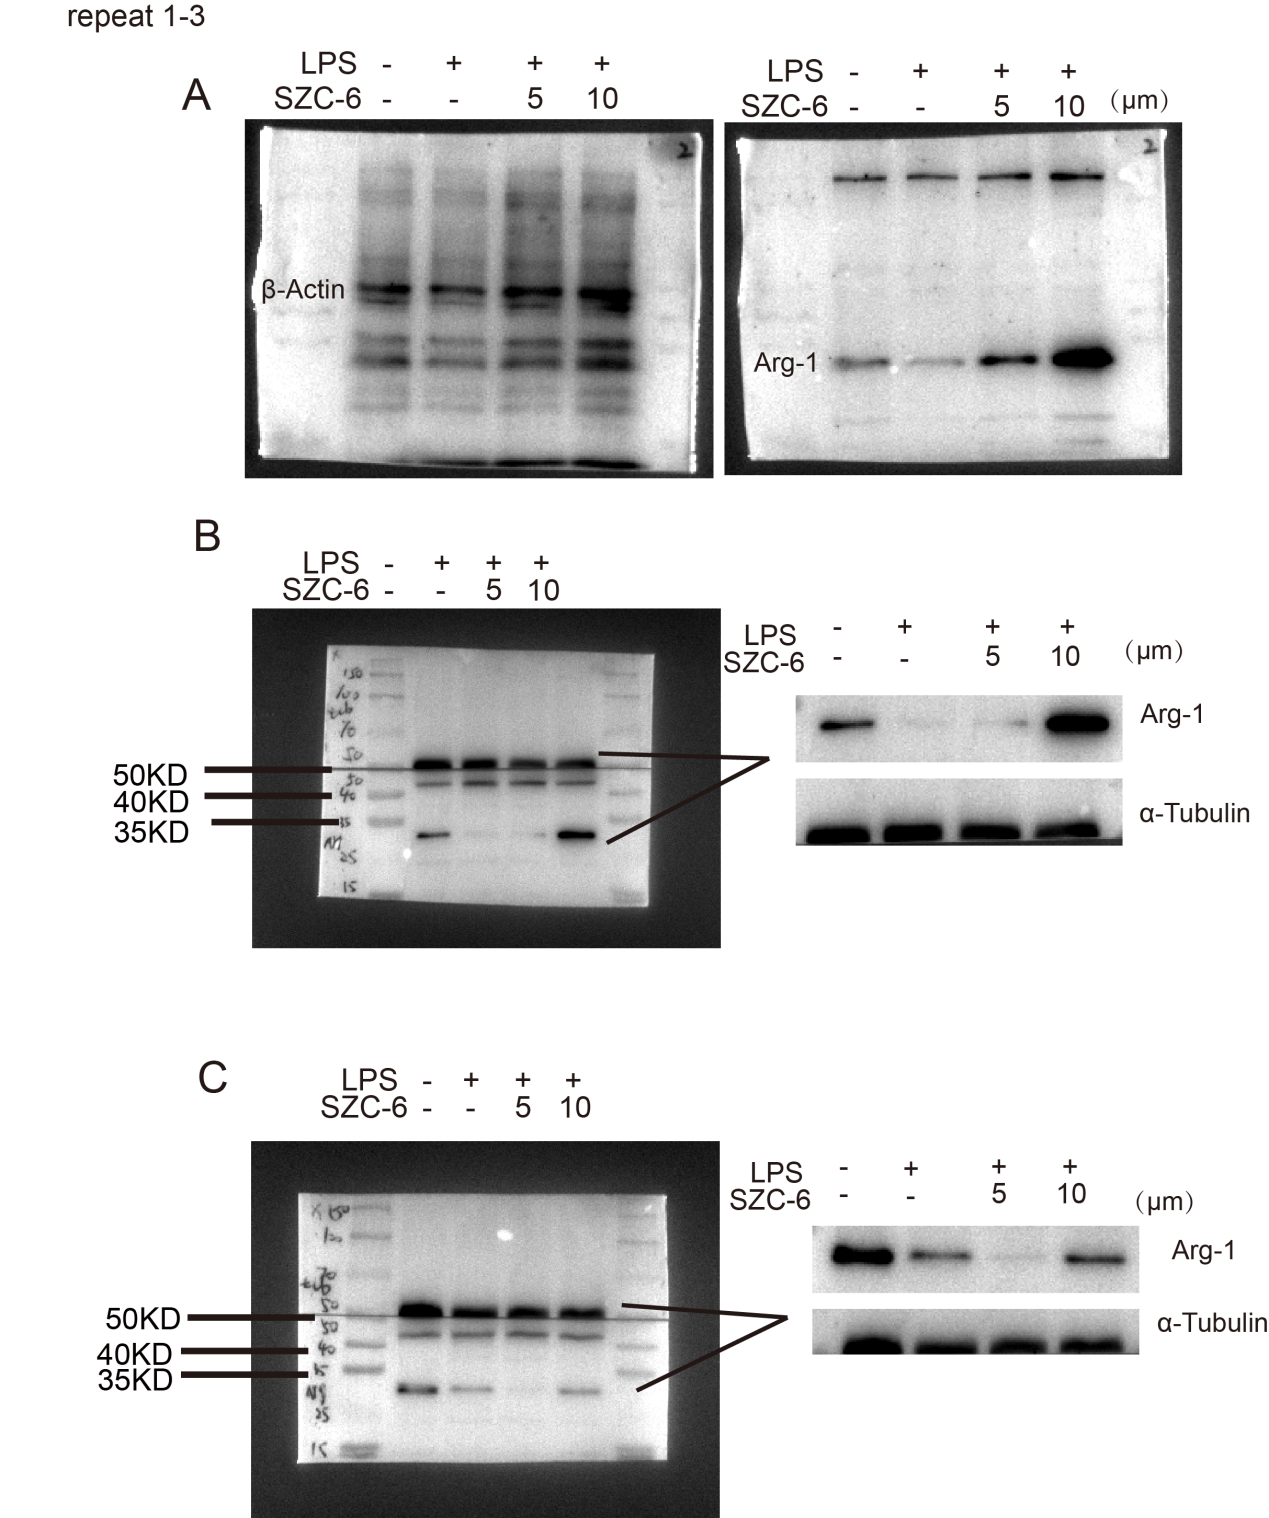


**Fig. S3.** Western blot analysis of α-Tubulin, Arg-1 expression in the RAW264.7 cell(*n* = 3).


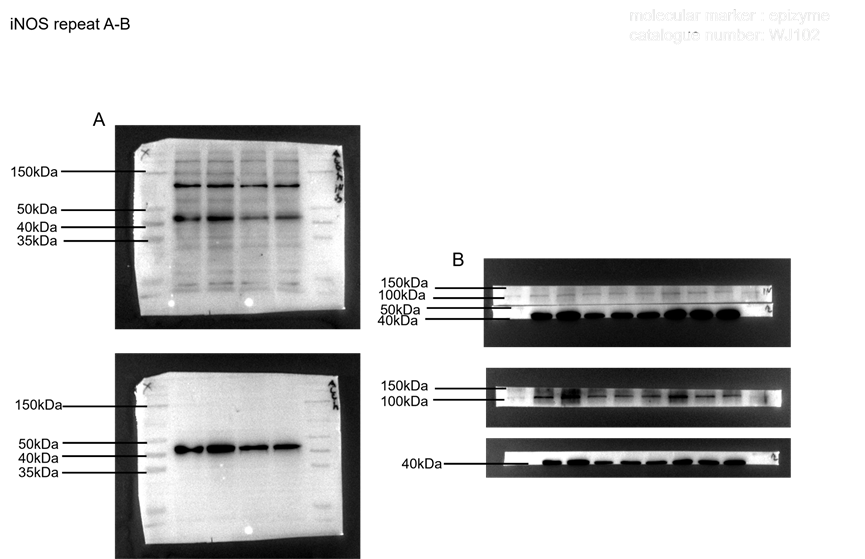


**Fig. S4.** Western blot analysis of iNos, β-Actin expression in the RAW264.7 cell(*n* = 3).


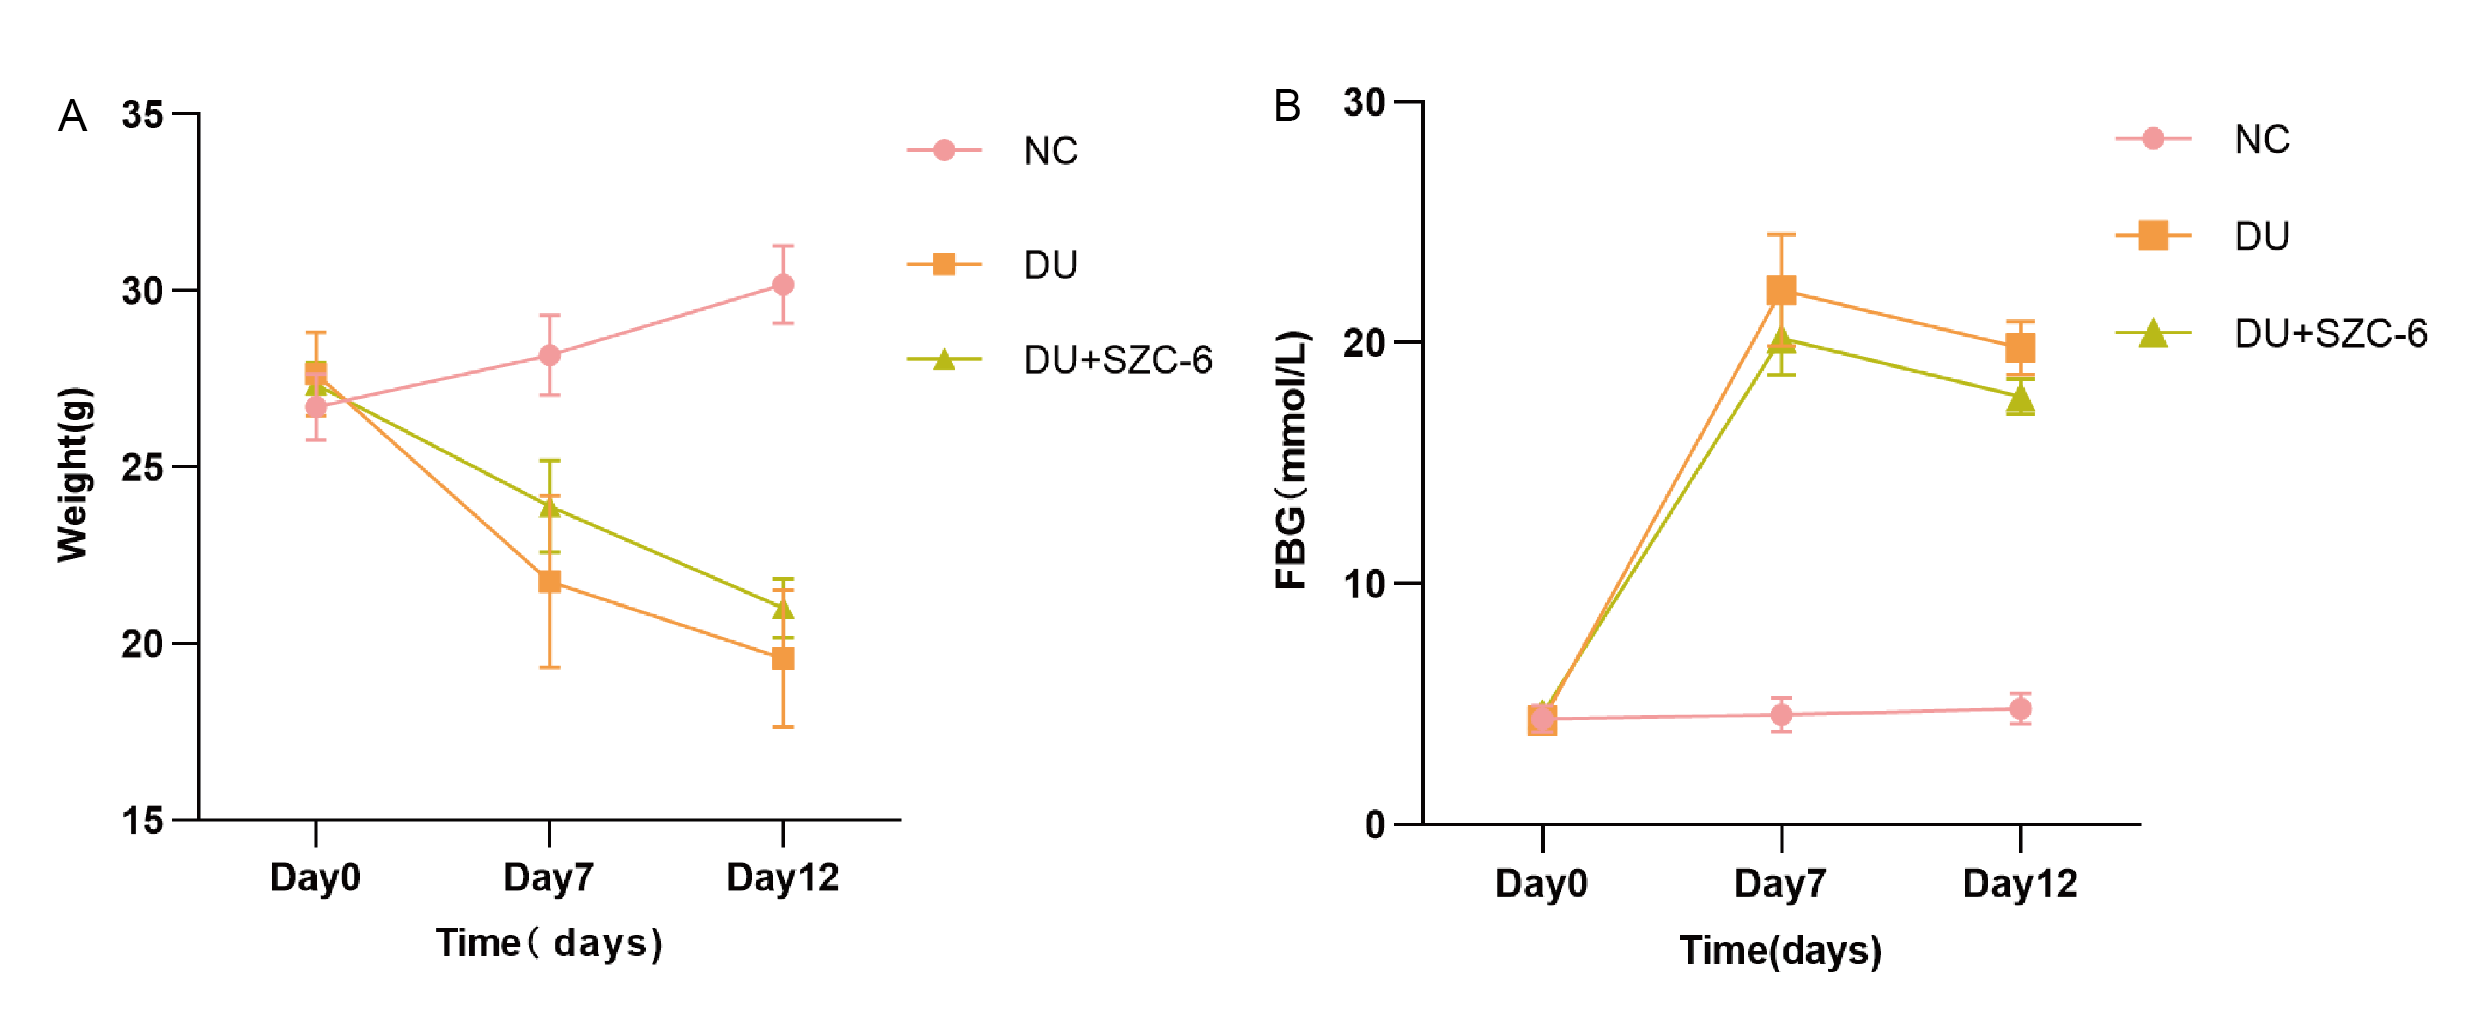


**Fig. S5.** Establishment of diabetic wound model.

(A)body weight level. (B)blood glucose levelof mice (*n* = 6).


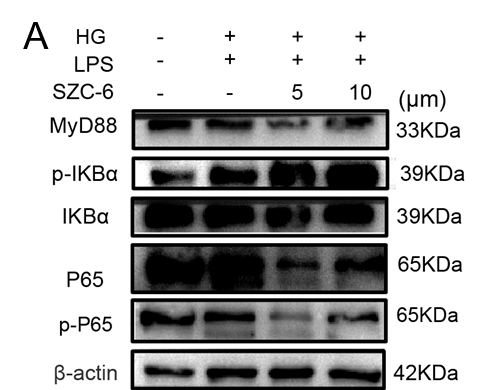

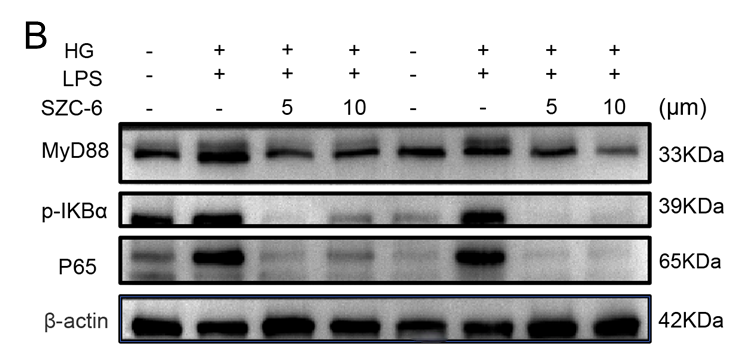


**Fig. S6.** Western blot analysis of β-actin,NF-χB p65, MyD88, p-IκBα expression in the RAW264.7 cell(*n* = 3).

**Table. S1.** The primer sequences used in the quantitative real-time PCR experiments.

| Gene name | forward primer（5’→3’） | reverse primer（5’→3’） |
| --- | --- | --- |
| *β-actin* | TGACAGGATGCAGAAGGAGA | GCTGGAAGGTGGACAGTGAG |
| *Arginase-1* | CTCCAAGCCAAAGTCCTTAGAG | AGGAGCTGTCATTAGGGACATC |
| *Retnla* | CTCCACTGTAACGAAGACTC | GCAGTGGTCCAGTCAACGA |
| *Il-6* | CAACGATGATGCACTTGCAGA | TGTGACTCCAGCTTATCTCTTGG |
| *Tnf-α* | CTCAGCGAGGACAGCAAGG | AGGGACAGAACCTGCCTGG |
| *iNos* | GCGCTCTAGTGAAGCAAAGC | AGTGAAATCCGATGTGGCCTG |
