# Supplementary material for: SZC-6 Promotes Diabetic Wound Healing in Mice by Modulating M1/M2 Macrophage Ratio and Inhibiting MyD88/NF-χB Pathway
Source: Research Square preprint supplement (doi:10.21203/rs.3.rs-6886236/v1), 2025-06-19
Supplement: Supplementary file 2 [file 74e03cdce2656eb3837491e2.xlsx]

## Sheet: Table1. Drug Targets
SwissTargetPrediction
Target	Common name	Uniprot ID	ChEMBL ID	Target Class	Probability*	Known actives (3D/2D)
ATP-binding cassette sub-family G member 2	ABCG2	Q9UNQ0	CHEMBL5393	Primary active transporter	0.46923	38 / 47
Aldose reductase (by homology)	AKR1B1	P15121	CHEMBL1900	Enzyme	0.313573	88 / 63
Multidrug resistance-associated protein 1	ABCC1	P33527	CHEMBL3004	Primary active transporter	0.231637	2 / 11
Estrogen receptor beta	ESR2	Q92731	CHEMBL242	Nuclear receptor	0.215238	95 / 33
Monoamine oxidase B	MAOB	P27338	CHEMBL2039	Oxidoreductase	0.198834	101 / 54
Stem cell growth factor receptor	KIT	P10721	CHEMBL1936	Kinase	0.141522	29 / 2
Tankyrase-1	TNKS	O95271	CHEMBL6164	Enzyme	0.141522	3 / 28
Beta amyloid A4 protein	APP	P05067	CHEMBL2487	Membrane receptor	0.141522	36 / 12
Calmodulin	CALM1	P62158	CHEMBL6093	Unclassified protein	0.141522	0 / 1
Cyclooxygenase-2	PTGS2	P35354	CHEMBL230	Oxidoreductase	0.133338	53 / 40
Estrogen receptor alpha	ESR1	P03372	CHEMBL206	Nuclear receptor	0.133338	100 / 35
Cytochrome P450 19A1	CYP19A1	P11511	CHEMBL1978	Cytochrome P450	0.133338	36 / 19
Arachidonate 5-lipoxygenase	ALOX5	P09917	CHEMBL215	Oxidoreductase	0.125143	112 / 47
Estradiol 17-beta-dehydrogenase 1	HSD17B1	P14061	CHEMBL3181	Enzyme	0.125143	59 / 4
Cytochrome P450 1B1	CYP1B1	Q16678	CHEMBL4878	Cytochrome P450	0.125143	11 / 47
Carbonic anhydrase II	CA2	P00918	CHEMBL205	Lyase	0.116965	208 / 19
Androgen Receptor	AR	P10275	CHEMBL1871	Nuclear receptor	0.116965	38 / 16
Carbonic anhydrase XII	CA12	O43570	CHEMBL3242	Lyase	0.116965	101 / 16
Carbonic anhydrase IX	CA9	Q16790	CHEMBL3594	Lyase	0.116965	120 / 10
6-phosphofructo-2-kinase/fructose-2,6-bisphosphatase 3	PFKFB3	Q16875	CHEMBL2331053	Enzyme	0.116965	19 / 2
Dopamine D2 receptor	DRD2	P14416	CHEMBL217	Family A G protein-coupled receptor	0.116965	72 / 63
Poly [ADP-ribose] polymerase-1	PARP1	P09874	CHEMBL3105	Enzyme	0.108771	96 / 9
Serine/threonine-protein kinase PIM1	PIM1	P11309	CHEMBL2147	Kinase	0.108771	46 / 7
Adenosine A2a receptor	ADORA2A	P29274	CHEMBL251	Family A G protein-coupled receptor	0.108771	59 / 11
Adenosine A3 receptor	ADORA3	P0DMS8	CHEMBL256	Family A G protein-coupled receptor	0.108771	41 / 21
Sigma opioid receptor	SIGMAR1	Q99720	CHEMBL287	Membrane receptor	0.108771	22 / 69
Adenosine A1 receptor	ADORA1	P30542	CHEMBL226	Family A G protein-coupled receptor	0.108771	88 / 23
Tyrosine-protein kinase LCK	LCK	P06239	CHEMBL258	Kinase	0.108771	57 / 3
Tankyrase-2	TNKS2	Q9H2K2	CHEMBL6154	Enzyme	0.108771	3 / 12
Carbonic anhydrase I	CA1	P00915	CHEMBL261	Lyase	0.108771	185 / 15
Cyclin-dependent kinase 5/CDK5 activator 1	CDK5R1 CDK5	Q15078 Q00535	CHEMBL1907600	Kinase	0.108771	37 / 16
Receptor-type tyrosine-protein phosphatase S	PTPRS	Q13332	CHEMBL2396508	Phosphatase	0.108771	0 / 8
AMY1C	AMY1A	P04745	CHEMBL2478	Enzyme	0.108771	0 / 1
Monoamine oxidase A	MAOA	P21397	CHEMBL1951	Oxidoreductase	0.108771	58 / 36
Delta opioid receptor	OPRD1	P41143	CHEMBL236	Family A G protein-coupled receptor	0.108771	33 / 5
Tyrosine-protein kinase receptor FLT3	FLT3	P36888	CHEMBL1974	Kinase	0.108771	52 / 6
Cyclin-dependent kinase 6	CDK6	Q00534	CHEMBL2508	Kinase	0.108771	0 / 3
Cyclin-dependent kinase 2	CDK2	P24941	CHEMBL301	Kinase	0.108771	80 / 9
P-glycoprotein 1	ABCB1	P08183	CHEMBL4302	Primary active transporter	0.108771	6 / 45
Glycogen synthase kinase-3 beta	GSK3B	P49841	CHEMBL262	Kinase	0.108771	98 / 6
Carbonic anhydrase VII	CA7	P43166	CHEMBL2326	Lyase	0.100579	31 / 10
Estradiol 17-beta-dehydrogenase 2	HSD17B2	P37059	CHEMBL2789	Enzyme	0.100579	63 / 3
Tyrosine-protein kinase SYK	SYK	P43405	CHEMBL2599	Kinase	0.100579	52 / 3
Casein kinase II alpha	CSNK2A1	P68400	CHEMBL3629	Kinase	0.100579	5 / 2
Neurokinin 2 receptor	TACR2	P21452	CHEMBL2327	Family A G protein-coupled receptor	0.100579	0 / 1
Cytochrome P450 1A2	CYP1A2	P05177	CHEMBL3356	Cytochrome P450	0.100579	0 / 9
DNA-dependent protein kinase	PRKDC	P78527	CHEMBL3142	Kinase	0.100579	31 / 17
Cyclin-dependent kinase 1/cyclin B	CCNB3 CDK1 CCNB1 CCNB2	Q8WWL7 P06493 P14635 O95067	CHEMBL2094127	Other cytosolic protein	0.100579	23 / 4
Lysine-specific demethylase 4D-like	KDM4E	B2RXH2	CHEMBL1293226	Eraser	0.100579	0 / 2
Tyrosine-protein kinase FYN	FYN	P06241	CHEMBL1841	Kinase	0.100579	4 / 1
Acetylcholinesterase	ACHE	P22303	CHEMBL220	Hydrolase	0.100579	25 / 27
Matrix metalloproteinase 9	MMP9	P14780	CHEMBL321	Protease	0.100579	388 / 2
Matrix metalloproteinase 2	MMP2	P08253	CHEMBL333	Protease	0.100579	368 / 2
NADPH oxidase 4	NOX4	Q9NPH5	CHEMBL1250375	Enzyme	0.100579	10 / 6
Xanthine dehydrogenase	XDH	P47989	CHEMBL1929	Oxidoreductase	0.100579	9 / 20
Cyclin-dependent kinase 1	CDK1	P06493	CHEMBL308	Kinase	0.100579	32 / 8
Cytosolic phospholipase A2	PLA2G4A	P47712	CHEMBL3816	Enzyme	0.100579	0 / 2
Carbonyl reductase [NADPH] 1	CBR1	P16152	CHEMBL5586	Enzyme	0.100579	0 / 2
Aldo-keto reductase family 1 member B10	AKR1B10	O60218	CHEMBL5983	Enzyme	0.100579	24 / 3
Epidermal growth factor receptor erbB1	EGFR	P00533	CHEMBL203	Kinase	0.100579	157 / 26
Dual specificity mitogen-activated protein kinase kinase 1	MAP2K1	Q02750	CHEMBL3587	Kinase	0.100579	12 / 1
Glyoxalase I	GLO1	Q04760	CHEMBL2424	Enzyme	0.100579	0 / 4
Arginase-1 (by homology)	ARG1	P05089	CHEMBL1075097	Enzyme	0.100579	0 / 2
Induced myeloid leukemia cell differentiation protein Mcl-1	MCL1	Q07820	CHEMBL4361	Other cytosolic protein	0.100579	17 / 4
Phosphodiesterase 5A	PDE5A	O76074	CHEMBL1827	Phosphodiesterase	0.100579	46 / 5
Neurotrophic tyrosine kinase receptor type 2	NTRK2	Q16620	CHEMBL4898	Kinase	0.100579	1 / 1
Cyclooxygenase-1	PTGS1	P23219	CHEMBL221	Oxidoreductase	0.100579	14 / 7
Arachidonate 15-lipoxygenase	ALOX15	P16050	CHEMBL2903	Enzyme	0.100579	5 / 5
Beta-galactoside alpha-2,6-sialyltransferase 1	ST6GAL1	P15907	CHEMBL3596075	Transferase	0.100579	2 / 2
Telomerase reverse transcriptase	TERT	O14746	CHEMBL2916	Enzyme	0.100579	8 / 20
Thromboxane-A synthase	TBXAS1	P24557	CHEMBL1835	Cytochrome P450	0.100579	5 / 2
Matrix metalloproteinase 12	MMP12	P39900	CHEMBL4393	Protease	0.100579	30 / 2
Aryl hydrocarbon receptor	AHR	P35869	CHEMBL3201	Transcription factor	0.100579	0 / 1
Transthyretin	TTR	P02766	CHEMBL3194	Secreted protein	0.100579	2 / 2
NEDD8-activating enzyme E1 regulatory subunit	NAE1	Q13564	CHEMBL2016431	Unclassified protein	0.100579	0 / 1
Carbonic anhydrase IV	CA4	P22748	CHEMBL3729	Lyase	0.100579	14 / 10
Arachidonate 12-lipoxygenase	ALOX12	P18054	CHEMBL3687	Enzyme	0.100579	2 / 6
Vascular endothelial growth factor receptor 2	KDR	P35968	CHEMBL279	Kinase	0.100579	160 / 3
Serine/threonine-protein kinase Chk1	CHEK1	O14757	CHEMBL4630	Kinase	0.100579	125 / 0
Serine/threonine-protein kinase WEE1	WEE1	P30291	CHEMBL5491	Kinase	0.100579	92 / 0
Protein-tyrosine phosphatase 1B	PTPN1	P18031	CHEMBL335	Phosphatase	0.100579	27 / 14
Neuronal acetylcholine receptor protein alpha-7 subunit	CHRNA7	P36544	CHEMBL2492	Ligand-gated ion channel	0.100579	13 / 0
PI3-kinase p85-alpha subunit	PIK3R1	P27986	CHEMBL2506	Enzyme	0.100579	1 / 1
Inhibitor of nuclear factor kappa B kinase beta subunit	IKBKB	O14920	CHEMBL1991	Kinase	0.100579	22 / 1
MAP kinase ERK1	MAPK3	P27361	CHEMBL3385	Kinase	0.100579	7 / 1
ALK tyrosine kinase receptor	ALK	Q9UM73	CHEMBL4247	Kinase	0.100579	10 / 3
G-protein coupled receptor 35	GPR35	Q9HC97	CHEMBL1293267	Family A G protein-coupled receptor	0.100579	0 / 5
DNA-3-methyladenine glycosylase	MPG	P29372	CHEMBL3396943	Enzyme	0.100579	0 / 1
G protein-coupled receptor kinase 6	GRK6	P43250	CHEMBL6144	Kinase	0.100579	1 / 4
Ezrin	EZR	P15311	CHEMBL1932896	Unclassified protein	0.100579	3 / 0
Cystic fibrosis transmembrane conductance regulator	CFTR	P13569	CHEMBL4051	Other ion channel	0.100579	3 / 1
Cyclin-dependent kinase 4	CDK4	P11802	CHEMBL331	Kinase	0.100579	33 / 0
Phospholipase A2 group IIA	PLA2G2A	P14555	CHEMBL3474	Enzyme	0.100579	5 / 2
Plasminogen	PLG	P00747	CHEMBL1801	Protease	0.100579	2 / 3
Tyrosine-protein kinase SRC	SRC	P12931	CHEMBL267	Kinase	0.100579	65 / 4
Matrix metalloproteinase 13	MMP13	P45452	CHEMBL280	Protease	0.100579	244 / 1
Histone deacetylase 5	HDAC5	Q9UQL6	CHEMBL2563	Eraser	0.100579	19 / 0
Death-associated protein kinase 1	DAPK1	P53355	CHEMBL2558	Kinase	0.100579	1 / 2
MAP kinase ERK2	MAPK1	P28482	CHEMBL4040	Kinase	0.100579	54 / 1
Matrix metalloproteinase 3	MMP3	P08254	CHEMBL283	Protease	0.100579	211 / 1

## Sheet: Table2. Disease Targets
Gene Symbol	Description	Category	Uniprot ID	Gifts	GC Id	Relevance score	GeneCards Link
INS	Insulin	Protein Coding	P01308	56	GC11M002159	117.582	https://www.genecards.org/cgi-bin/carddisp.pl?gene=INS
GCK	Glucokinase	Protein Coding	P35557	58	GC07M045340	81.0901	https://www.genecards.org/cgi-bin/carddisp.pl?gene=GCK
IL6	Interleukin 6	Protein Coding	P05231	60	GC07P022725	79.341	https://www.genecards.org/cgi-bin/carddisp.pl?gene=IL6
KCNJ11	Potassium Inwardly Rectifying Channel Subfamily J Member 11	Protein Coding	Q14654	54	GC11M017948	77.4088	https://www.genecards.org/cgi-bin/carddisp.pl?gene=KCNJ11
HNF1A	HNF1 Homeobox A	Protein Coding	P20823	55	GC12P120978	75.6954	https://www.genecards.org/cgi-bin/carddisp.pl?gene=HNF1A
ABCC8	ATP Binding Cassette Subfamily C Member 8	Protein Coding	Q09428	54	GC11M017392	70.4599	https://www.genecards.org/cgi-bin/carddisp.pl?gene=ABCC8
HNF4A	Hepatocyte Nuclear Factor 4 Alpha	Protein Coding	P41235	58	GC20P044355	65.164	https://www.genecards.org/cgi-bin/carddisp.pl?gene=HNF4A
PPARG	Peroxisome Proliferator Activated Receptor Gamma	Protein Coding	P37231	61	GC03P012287	64.7573	https://www.genecards.org/cgi-bin/carddisp.pl?gene=PPARG
WFS1	Wolframin ER Transmembrane Glycoprotein	Protein Coding	O76024	54	GC04P006269	61.0084	https://www.genecards.org/cgi-bin/carddisp.pl?gene=WFS1
PDX1	Pancreatic And Duodenal Homeobox 1	Protein Coding	P52945	54	GC13P027921	59.7857	https://www.genecards.org/cgi-bin/carddisp.pl?gene=PDX1
HNF1B	HNF1 Homeobox B	Protein Coding	P35680	52	GC17M037686	58.2371	https://www.genecards.org/cgi-bin/carddisp.pl?gene=HNF1B
TNF	Tumor Necrosis Factor	Protein Coding	P01375	61	GC06P134820	56.8992	https://www.genecards.org/cgi-bin/carddisp.pl?gene=TNF
ACE	Angiotensin I Converting Enzyme	Protein Coding	P12821	60	GC17P063477	56.2167	https://www.genecards.org/cgi-bin/carddisp.pl?gene=ACE
TCF7L2	Transcription Factor 7 Like 2	Protein Coding	Q9NQB0	54	GC10P112950	55.5447	https://www.genecards.org/cgi-bin/carddisp.pl?gene=TCF7L2
INSR	Insulin Receptor	Protein Coding	P06213	62	GC19M007112	52.068	https://www.genecards.org/cgi-bin/carddisp.pl?gene=INSR
NEUROD1	Neuronal Differentiation 1	Protein Coding	Q13562	52	GC02M181673	49.1368	https://www.genecards.org/cgi-bin/carddisp.pl?gene=NEUROD1
IRS1	Insulin Receptor Substrate 1	Protein Coding	P35568	56	GC02M226731	48.5645	https://www.genecards.org/cgi-bin/carddisp.pl?gene=IRS1
PTPN22	Protein Tyrosine Phosphatase Non-Receptor Type 22	Protein Coding	Q9Y2R2	55	GC01M113813	47.6331	https://www.genecards.org/cgi-bin/carddisp.pl?gene=PTPN22
PAX4	Paired Box 4	Protein Coding	O43316	50	GC07M127610	47.5296	https://www.genecards.org/cgi-bin/carddisp.pl?gene=PAX4
VEGFA	Vascular Endothelial Growth Factor A	Protein Coding	P15692	57	GC06P043770	47.3447	https://www.genecards.org/cgi-bin/carddisp.pl?gene=VEGFA
SLC30A8	Solute Carrier Family 30 Member 8	Protein Coding	Q8IWU4	50	GC08P116950	46.444	https://www.genecards.org/cgi-bin/carddisp.pl?gene=SLC30A8
CTLA4	Cytotoxic T-Lymphocyte Associated Protein 4	Protein Coding	P16410	57	GC02P203866	46.3349	https://www.genecards.org/cgi-bin/carddisp.pl?gene=CTLA4
HLA-DRB1	Major Histocompatibility Complex, Class II, DR Beta 1	Protein Coding	P01911	55	GC06M093834	45.9763	https://www.genecards.org/cgi-bin/carddisp.pl?gene=HLA-DRB1
CDKAL1	CDK5 Regulatory Subunit Associated Protein 1 Like 1	Protein Coding	Q5VV42	49	GC06P020534	45.2828	https://www.genecards.org/cgi-bin/carddisp.pl?gene=CDKAL1
RETN	Resistin	Protein Coding	Q9HD89	51	GC19P007669	45.1294	https://www.genecards.org/cgi-bin/carddisp.pl?gene=RETN
ADIPOQ	Adiponectin, C1Q And Collagen Domain Containing	Protein Coding	Q15848	55	GC03P186842	44.4197	https://www.genecards.org/cgi-bin/carddisp.pl?gene=ADIPOQ
ALB	Albumin	Protein Coding	P02768	58	GC04P073397	44.169	https://www.genecards.org/cgi-bin/carddisp.pl?gene=ALB
IL10	Interleukin 10	Protein Coding	P22301	56	GC01M206767	43.7277	https://www.genecards.org/cgi-bin/carddisp.pl?gene=IL10
PVT1	Pvt1 Oncogene	RNA Gene		32	GC08P128109	43.2604	https://www.genecards.org/cgi-bin/carddisp.pl?gene=PVT1
FOXP3	Forkhead Box P3	Protein Coding	Q9BZS1	56	GC0XM049250	42.4873	https://www.genecards.org/cgi-bin/carddisp.pl?gene=FOXP3
IL1B	Interleukin 1 Beta	Protein Coding	P01584	56	GC02M112829	41.7616	https://www.genecards.org/cgi-bin/carddisp.pl?gene=IL1B
ENPP1	Ectonucleotide Pyrophosphatase/Phosphodiesterase 1	Protein Coding	P22413	58	GC06P131808	41.6844	https://www.genecards.org/cgi-bin/carddisp.pl?gene=ENPP1
SLC2A4	Solute Carrier Family 2 Member 4	Protein Coding	P14672	55	GC17P111162	40.4997	https://www.genecards.org/cgi-bin/carddisp.pl?gene=SLC2A4
HLA-DQB1	Major Histocompatibility Complex, Class II, DQ Beta 1	Protein Coding	P01920	52	GC06M093843	40.1762	https://www.genecards.org/cgi-bin/carddisp.pl?gene=HLA-DQB1
CDKN2B-AS1	CDKN2B Antisense RNA 1	RNA Gene		31	GC09P021994	40.1593	https://www.genecards.org/cgi-bin/carddisp.pl?gene=CDKN2B-AS1
CRP	C-Reactive Protein	Protein Coding	P02741	54	GC01M161311	39.9428	https://www.genecards.org/cgi-bin/carddisp.pl?gene=CRP
H19	H19 Imprinted Maternally Expressed Transcript	RNA Gene		34	GC11M001995	39.8032	https://www.genecards.org/cgi-bin/carddisp.pl?gene=H19
AVPR2	Arginine Vasopressin Receptor 2	Protein Coding	P30518	54	GC0XP153902	39.2676	https://www.genecards.org/cgi-bin/carddisp.pl?gene=AVPR2
MEG3	Maternally Expressed 3	RNA Gene		34	GC14P116735	39.2003	https://www.genecards.org/cgi-bin/carddisp.pl?gene=MEG3
TGFB1	Transforming Growth Factor Beta 1	Protein Coding	P01137	61	GC19M041301	38.2639	https://www.genecards.org/cgi-bin/carddisp.pl?gene=TGFB1
IRS2	Insulin Receptor Substrate 2	Protein Coding	Q9Y4H2	54	GC13M109752	38.0756	https://www.genecards.org/cgi-bin/carddisp.pl?gene=IRS2
IL1RN	Interleukin 1 Receptor Antagonist	Protein Coding	P18510	59	GC02P143688	38.0024	https://www.genecards.org/cgi-bin/carddisp.pl?gene=IL1RN
MIR126	MicroRNA 126	RNA Gene		29	GC09P136670	37.8338	https://www.genecards.org/cgi-bin/carddisp.pl?gene=MIR126
AVP	Arginine Vasopressin	Protein Coding	P01185	54	GC20M003082	37.6248	https://www.genecards.org/cgi-bin/carddisp.pl?gene=AVP
INS-IGF2	INS-IGF2 Readthrough	Protein Coding	F8WCM5	35	GC11M011908	37.4435	https://www.genecards.org/cgi-bin/carddisp.pl?gene=INS-IGF2
PON1	Paraoxonase 1	Protein Coding	P27169	56	GC07M095297	37.147	https://www.genecards.org/cgi-bin/carddisp.pl?gene=PON1
NOD2	Nucleotide Binding Oligomerization Domain Containing 2	Protein Coding	Q9HC29	56	GC16P050693	36.4853	https://www.genecards.org/cgi-bin/carddisp.pl?gene=NOD2
GCG	Glucagon	Protein Coding	P01275	51	GC02M162142	36.1783	https://www.genecards.org/cgi-bin/carddisp.pl?gene=GCG
AQP2	Aquaporin 2	Protein Coding	P41181	55	GC12P049950	35.2266	https://www.genecards.org/cgi-bin/carddisp.pl?gene=AQP2
AKT2	AKT Serine/Threonine Kinase 2	Protein Coding	P31751	62	GC19M040230	35.0165	https://www.genecards.org/cgi-bin/carddisp.pl?gene=AKT2
MTNR1B	Melatonin Receptor 1B	Protein Coding	P49286	53	GC11P092969	34.7437	https://www.genecards.org/cgi-bin/carddisp.pl?gene=MTNR1B
MIR21	MicroRNA 21	RNA Gene		31	GC17P112757	34.6752	https://www.genecards.org/cgi-bin/carddisp.pl?gene=MIR21
HLA-DQA1	Major Histocompatibility Complex, Class II, DQ Alpha 1	Protein Coding	P01909	51	GC06P134852	34.1908	https://www.genecards.org/cgi-bin/carddisp.pl?gene=HLA-DQA1
HFE	Homeostatic Iron Regulator	Protein Coding	Q30201	54	GC06P026087	34.0161	https://www.genecards.org/cgi-bin/carddisp.pl?gene=HFE
TP53	Tumor Protein P53	Protein Coding	P04637	62	GC17M007661	33.8663	https://www.genecards.org/cgi-bin/carddisp.pl?gene=TP53
PTPN1	Protein Tyrosine Phosphatase Non-Receptor Type 1	Protein Coding	P18031	58	GC20P050510	33.7456	https://www.genecards.org/cgi-bin/carddisp.pl?gene=PTPN1
MIR29A	MicroRNA 29a	RNA Gene		29	GC07M130876	33.5606	https://www.genecards.org/cgi-bin/carddisp.pl?gene=MIR29A
IL2RA	Interleukin 2 Receptor Subunit Alpha	Protein Coding	P01589	59	GC10M006010	33.4977	https://www.genecards.org/cgi-bin/carddisp.pl?gene=IL2RA
LEP	Leptin	Protein Coding	P41159	55	GC07P128241	33.3479	https://www.genecards.org/cgi-bin/carddisp.pl?gene=LEP
CAT	Catalase	Protein Coding	P04040	60	GC11P034460	33.1434	https://www.genecards.org/cgi-bin/carddisp.pl?gene=CAT
IL6-AS1	IL6 Antisense RNA 1	RNA Gene		22	GC07M022867	33.0883	https://www.genecards.org/cgi-bin/carddisp.pl?gene=IL6-AS1
LOC126859963	BRD4-Independent Group 4 Enhancer GRCh37_chr7:22766269-22767468	Functional Element		9	GC07P022726	33.0883	https://www.genecards.org/cgi-bin/carddisp.pl?gene=LOC126859963
TLR4	Toll Like Receptor 4	Protein Coding	O00206	60	GC09P117704	33.068	https://www.genecards.org/cgi-bin/carddisp.pl?gene=TLR4
MIR125A	MicroRNA 125a	RNA Gene		29	GC19P113552	32.6278	https://www.genecards.org/cgi-bin/carddisp.pl?gene=MIR125A
WRN	WRN RecQ Like Helicase	Protein Coding	Q14191	56	GC08P031033	32.4352	https://www.genecards.org/cgi-bin/carddisp.pl?gene=WRN
GAS5	Growth Arrest Specific 5	RNA Gene		31	GC01M173947	32.3552	https://www.genecards.org/cgi-bin/carddisp.pl?gene=GAS5
CXCL8	C-X-C Motif Chemokine Ligand 8	Protein Coding	P10145	53	GC04P073740	31.9352	https://www.genecards.org/cgi-bin/carddisp.pl?gene=CXCL8
MTHFR	Methylenetetrahydrofolate Reductase	Protein Coding	P42898	56	GC01M011785	31.9264	https://www.genecards.org/cgi-bin/carddisp.pl?gene=MTHFR
SOCS1	Suppressor Of Cytokine Signaling 1	Protein Coding	O15524	54	GC16M020752	31.906	https://www.genecards.org/cgi-bin/carddisp.pl?gene=SOCS1
CAPN10	Calpain 10	Protein Coding	Q9HC96	49	GC02P240586	31.6421	https://www.genecards.org/cgi-bin/carddisp.pl?gene=CAPN10
SOD2	Superoxide Dismutase 2	Protein Coding	P04179	56	GC06M159669	31.2987	https://www.genecards.org/cgi-bin/carddisp.pl?gene=SOD2
STAT3	Signal Transducer And Activator Of Transcription 3	Protein Coding	P40763	62	GC17M042313	31.2956	https://www.genecards.org/cgi-bin/carddisp.pl?gene=STAT3
GCGR	Glucagon Receptor	Protein Coding	P47871	54	GC17P081804	30.97	https://www.genecards.org/cgi-bin/carddisp.pl?gene=GCGR
ICAM1	Intercellular Adhesion Molecule 1	Protein Coding	P05362	59	GC19P112296	30.8921	https://www.genecards.org/cgi-bin/carddisp.pl?gene=ICAM1
CDKN2A	Cyclin Dependent Kinase Inhibitor 2A	Protein Coding	Q8N726	60	GC09M021967	30.8084	https://www.genecards.org/cgi-bin/carddisp.pl?gene=CDKN2A
LMNA	Lamin A/C	Protein Coding	P02545	58	GC01P156082	30.7704	https://www.genecards.org/cgi-bin/carddisp.pl?gene=LMNA
KLF11	KLF Transcription Factor 11	Protein Coding	O14901	45	GC02P010112	30.2145	https://www.genecards.org/cgi-bin/carddisp.pl?gene=KLF11
IFNG	Interferon Gamma	Protein Coding	P01579	59	GC12M068154	29.7538	https://www.genecards.org/cgi-bin/carddisp.pl?gene=IFNG
AKR1B1	Aldo-Keto Reductase Family 1 Member B	Protein Coding	P15121	56	GC07M134442	29.66	https://www.genecards.org/cgi-bin/carddisp.pl?gene=AKR1B1
IGF1	Insulin Like Growth Factor 1	Protein Coding	P05019	57	GC12M102395	29.4379	https://www.genecards.org/cgi-bin/carddisp.pl?gene=IGF1
HLA-B	Major Histocompatibility Complex, Class I, B	Protein Coding	P01889	54	GC06M093738	29.2133	https://www.genecards.org/cgi-bin/carddisp.pl?gene=HLA-B
AGER	Advanced Glycosylation End-Product Specific Receptor	Protein Coding	Q15109	55	GC06M032180	29.2116	https://www.genecards.org/cgi-bin/carddisp.pl?gene=AGER
BLK	BLK Proto-Oncogene, Src Family Tyrosine Kinase	Protein Coding	P51451	58	GC08P011486	29.0408	https://www.genecards.org/cgi-bin/carddisp.pl?gene=BLK
SST	Somatostatin	Protein Coding	P61278	50	GC03M187668	28.9304	https://www.genecards.org/cgi-bin/carddisp.pl?gene=SST
CCL2	C-C Motif Chemokine Ligand 2	Protein Coding	P13500	58	GC17P034255	28.9117	https://www.genecards.org/cgi-bin/carddisp.pl?gene=CCL2
SERPINE1	Serpin Family E Member 1	Protein Coding	P05121	59	GC07P101127	28.8879	https://www.genecards.org/cgi-bin/carddisp.pl?gene=SERPINE1
APOE	Apolipoprotein E	Protein Coding	P02649	59	GC19P113251	28.7535	https://www.genecards.org/cgi-bin/carddisp.pl?gene=APOE
NOS3	Nitric Oxide Synthase 3	Protein Coding	P29474	59	GC07P158097	28.7133	https://www.genecards.org/cgi-bin/carddisp.pl?gene=NOS3
MAPK8IP1	Mitogen-Activated Protein Kinase 8 Interacting Protein 1	Protein Coding	Q9UQF2	53	GC11P047713	28.6939	https://www.genecards.org/cgi-bin/carddisp.pl?gene=MAPK8IP1
HMGA1	High Mobility Group AT-Hook 1	Protein Coding	P17096	55	GC06P134947	28.4464	https://www.genecards.org/cgi-bin/carddisp.pl?gene=HMGA1
EPO	Erythropoietin	Protein Coding	P01588	52	GC07P100720	28.4041	https://www.genecards.org/cgi-bin/carddisp.pl?gene=EPO
AKT1	AKT Serine/Threonine Kinase 1	Protein Coding	P31749	62	GC14M104769	28.3139	https://www.genecards.org/cgi-bin/carddisp.pl?gene=AKT1
MIR29C	MicroRNA 29c	RNA Gene		25	GC01M207832	28.0967	https://www.genecards.org/cgi-bin/carddisp.pl?gene=MIR29C
MIR155	MicroRNA 155	RNA Gene		29	GC21P025573	28.0129	https://www.genecards.org/cgi-bin/carddisp.pl?gene=MIR155
IAPP	Islet Amyloid Polypeptide	Protein Coding	P10997	49	GC12P021354	27.8728	https://www.genecards.org/cgi-bin/carddisp.pl?gene=IAPP
MALAT1	Metastasis Associated Lung Adenocarcinoma Transcript 1	RNA Gene		32	GC11P089089	27.466	https://www.genecards.org/cgi-bin/carddisp.pl?gene=MALAT1
GAST	Gastrin	Protein Coding	P01350	48	GC17P041712	27.3331	https://www.genecards.org/cgi-bin/carddisp.pl?gene=GAST
RFX6	Regulatory Factor X6	Protein Coding	Q8HWS3	46	GC06P116877	26.7338	https://www.genecards.org/cgi-bin/carddisp.pl?gene=RFX6
IL2	Interleukin 2	Protein Coding	P60568	55	GC04M122451	26.7074	https://www.genecards.org/cgi-bin/carddisp.pl?gene=IL2
MPO	Myeloperoxidase	Protein Coding	P05164	61	GC17M058269	26.3343	https://www.genecards.org/cgi-bin/carddisp.pl?gene=MPO
GPD2	Glycerol-3-Phosphate Dehydrogenase 2	Protein Coding	P43304	55	GC02P156408	26.3196	https://www.genecards.org/cgi-bin/carddisp.pl?gene=GPD2
PTGS2	Prostaglandin-Endoperoxide Synthase 2	Protein Coding	P35354	58	GC01M186671	26.0297	https://www.genecards.org/cgi-bin/carddisp.pl?gene=PTGS2
GAD2	Glutamate Decarboxylase 2	Protein Coding	Q05329	53	GC10P026216	25.7048	https://www.genecards.org/cgi-bin/carddisp.pl?gene=GAD2
PTF1A	Pancreas Associated Transcription Factor 1a	Protein Coding	Q7RTS3	50	GC10P023194	25.5701	https://www.genecards.org/cgi-bin/carddisp.pl?gene=PTF1A
DPP4	Dipeptidyl Peptidase 4	Protein Coding	P27487	58	GC02M161992	25.528	https://www.genecards.org/cgi-bin/carddisp.pl?gene=DPP4
SUMO4	Small Ubiquitin Like Modifier 4	Protein Coding	Q6EEV6	46	GC06P149401	25.4717	https://www.genecards.org/cgi-bin/carddisp.pl?gene=SUMO4
GHRL	Ghrelin And Obestatin Prepropeptide	Protein Coding	Q9UBU3	50	GC03M010285	25.4504	https://www.genecards.org/cgi-bin/carddisp.pl?gene=GHRL
ZFP57	ZFP57 Zinc Finger Protein	Protein Coding	Q9NU63	47	GC06M029672	25.4299	https://www.genecards.org/cgi-bin/carddisp.pl?gene=ZFP57
IL4	Interleukin 4	Protein Coding	P05112	55	GC05P132673	25.3778	https://www.genecards.org/cgi-bin/carddisp.pl?gene=IL4
APOB	Apolipoprotein B	Protein Coding	P04114	55	GC02M020956	25.3468	https://www.genecards.org/cgi-bin/carddisp.pl?gene=APOB
SLC11A1	Solute Carrier Family 11 Member 1	Protein Coding	P49279	55	GC02P218382	25.1206	https://www.genecards.org/cgi-bin/carddisp.pl?gene=SLC11A1
APPL1	Adaptor Protein, Phosphotyrosine Interacting With PH Domain And Leucine Zipper 1	Protein Coding	Q9UKG1	52	GC03P057227	25.0705	https://www.genecards.org/cgi-bin/carddisp.pl?gene=APPL1
CISD2	CDGSH Iron Sulfur Domain 2	Protein Coding	Q8N5K1	49	GC04P102868	25.0615	https://www.genecards.org/cgi-bin/carddisp.pl?gene=CISD2
OAS1	2'-5'-Oligoadenylate Synthetase 1	Protein Coding	P00973	53	GC12P113005	25.0226	https://www.genecards.org/cgi-bin/carddisp.pl?gene=OAS1
MMP9	Matrix Metallopeptidase 9	Protein Coding	P14780	62	GC20P046008	24.9051	https://www.genecards.org/cgi-bin/carddisp.pl?gene=MMP9
VDR	Vitamin D Receptor	Protein Coding	P11473	57	GC12M047841	24.891	https://www.genecards.org/cgi-bin/carddisp.pl?gene=VDR
FGF2	Fibroblast Growth Factor 2	Protein Coding	P09038	54	GC04P122826	24.8752	https://www.genecards.org/cgi-bin/carddisp.pl?gene=FGF2
SPINK1	Serine Peptidase Inhibitor Kazal Type 1	Protein Coding	P00995	51	GC05M147825	24.7623	https://www.genecards.org/cgi-bin/carddisp.pl?gene=SPINK1
NOS2	Nitric Oxide Synthase 2	Protein Coding	P35228	58	GC17M027756	24.689	https://www.genecards.org/cgi-bin/carddisp.pl?gene=NOS2
ITPR3	Inositol 1,4,5-Trisphosphate Receptor Type 3	Protein Coding	Q14573	55	GC06P033620	24.6407	https://www.genecards.org/cgi-bin/carddisp.pl?gene=ITPR3
IL23R	Interleukin 23 Receptor	Protein Coding	Q5VWK5	53	GC01P067138	24.5917	https://www.genecards.org/cgi-bin/carddisp.pl?gene=IL23R
LPL	Lipoprotein Lipase	Protein Coding	P06858	59	GC08P019901	24.571	https://www.genecards.org/cgi-bin/carddisp.pl?gene=LPL
IFIH1	Interferon Induced With Helicase C Domain 1	Protein Coding	Q9BYX4	57	GC02M162267	24.4725	https://www.genecards.org/cgi-bin/carddisp.pl?gene=IFIH1
CTNNB1	Catenin Beta 1	Protein Coding	P35222	62	GC03P041194	24.3761	https://www.genecards.org/cgi-bin/carddisp.pl?gene=CTNNB1
GLIS3	GLIS Family Zinc Finger 3	Protein Coding	Q8NEA6	46	GC09M003816	24.3729	https://www.genecards.org/cgi-bin/carddisp.pl?gene=GLIS3
MEN1	Menin 1	Protein Coding	O00255	54	GC11M064803	24.304	https://www.genecards.org/cgi-bin/carddisp.pl?gene=MEN1
SLC19A2	Solute Carrier Family 19 Member 2	Protein Coding	O60779	54	GC01M169463	24.2521	https://www.genecards.org/cgi-bin/carddisp.pl?gene=SLC19A2
MIR34A	MicroRNA 34a	RNA Gene		29	GC01M014460	24.1607	https://www.genecards.org/cgi-bin/carddisp.pl?gene=MIR34A
CDKN2B	Cyclin Dependent Kinase Inhibitor 2B	Protein Coding	P42772	54	GC09M022002	24.055	https://www.genecards.org/cgi-bin/carddisp.pl?gene=CDKN2B
FTO	FTO Alpha-Ketoglutarate Dependent Dioxygenase	Protein Coding	Q9C0B1	55	GC16P082352	23.9417	https://www.genecards.org/cgi-bin/carddisp.pl?gene=FTO
PTPRN	Protein Tyrosine Phosphatase Receptor Type N	Protein Coding	Q16849	53	GC02M219289	23.9412	https://www.genecards.org/cgi-bin/carddisp.pl?gene=PTPRN
IL18	Interleukin 18	Protein Coding	Q14116	53	GC11M112143	23.8091	https://www.genecards.org/cgi-bin/carddisp.pl?gene=IL18
AGT	Angiotensinogen	Protein Coding	P01019	58	GC01M230690	23.7505	https://www.genecards.org/cgi-bin/carddisp.pl?gene=AGT
MIR17	MicroRNA 17	RNA Gene		26	GC13P091350	23.719	https://www.genecards.org/cgi-bin/carddisp.pl?gene=MIR17
MIR192	MicroRNA 192	RNA Gene		29	GC11M064891	23.3723	https://www.genecards.org/cgi-bin/carddisp.pl?gene=MIR192
IL17A	Interleukin 17A	Protein Coding	Q16552	52	GC06P052186	23.2192	https://www.genecards.org/cgi-bin/carddisp.pl?gene=IL17A
AP4B1-AS1	AP4B1 Antisense RNA 1	RNA Gene		23	GC01P113831	23.1913	https://www.genecards.org/cgi-bin/carddisp.pl?gene=AP4B1-AS1
CCR5	C-C Motif Chemokine Receptor 5	Protein Coding	P51681	56	GC03P057395	23.1545	https://www.genecards.org/cgi-bin/carddisp.pl?gene=CCR5
NFKB1	Nuclear Factor Kappa B Subunit 1	Protein Coding	P19838	61	GC04P102501	23.1366	https://www.genecards.org/cgi-bin/carddisp.pl?gene=NFKB1
LTA	Lymphotoxin Alpha	Protein Coding	P01374	52	GC06P134818	23.1159	https://www.genecards.org/cgi-bin/carddisp.pl?gene=LTA
MIR145	MicroRNA 145	RNA Gene		30	GC05P149430	23.0455	https://www.genecards.org/cgi-bin/carddisp.pl?gene=MIR145
AQP5-AS1	AQP5 And AQP2 Antisense RNA 2	RNA Gene	A0A7L8Y648	20	GC12M049949	22.9966	https://www.genecards.org/cgi-bin/carddisp.pl?gene=AQP5-AS1
CP	Ceruloplasmin	Protein Coding	P00450	57	GC03M149162	22.8558	https://www.genecards.org/cgi-bin/carddisp.pl?gene=CP
LINC01370	Long Intergenic Non-Protein Coding RNA 1370	RNA Gene		18	GC20P041170	22.7952	https://www.genecards.org/cgi-bin/carddisp.pl?gene=LINC01370
PIK3CA	Phosphatidylinositol-4,5-Bisphosphate 3-Kinase Catalytic Subunit Alpha	Protein Coding	P42336	61	GC03P179148	22.7815	https://www.genecards.org/cgi-bin/carddisp.pl?gene=PIK3CA
TLR2	Toll Like Receptor 2	Protein Coding	O60603	61	GC04P153684	22.7797	https://www.genecards.org/cgi-bin/carddisp.pl?gene=TLR2
FAS	Fas Cell Surface Death Receptor	Protein Coding	P25445	59	GC10P109381	22.6965	https://www.genecards.org/cgi-bin/carddisp.pl?gene=FAS
SOD1	Superoxide Dismutase 1	Protein Coding	P00441	61	GC21P031659	22.599	https://www.genecards.org/cgi-bin/carddisp.pl?gene=SOD1
APOA1	Apolipoprotein A1	Protein Coding	P02647	59	GC11M116835	22.585	https://www.genecards.org/cgi-bin/carddisp.pl?gene=APOA1
RBPJ	Recombination Signal Binding Protein For Immunoglobulin Kappa J Region	Protein Coding	Q06330	55	GC04P026105	22.4805	https://www.genecards.org/cgi-bin/carddisp.pl?gene=RBPJ
TUG1	Taurine Up-Regulated 1	Protein Coding	A0A6I8PU40	32	GC22P030969	22.474	https://www.genecards.org/cgi-bin/carddisp.pl?gene=TUG1
MIR140	MicroRNA 140	RNA Gene		31	GC16P083017	22.4399	https://www.genecards.org/cgi-bin/carddisp.pl?gene=MIR140
CYP2C19	Cytochrome P450 Family 2 Subfamily C Member 19	Protein Coding	P33261	53	GC10P094762	22.2683	https://www.genecards.org/cgi-bin/carddisp.pl?gene=CYP2C19
VCAM1	Vascular Cell Adhesion Molecule 1	Protein Coding	P19320	55	GC01P100719	22.2434	https://www.genecards.org/cgi-bin/carddisp.pl?gene=VCAM1
HP	Haptoglobin	Protein Coding	P00738	54	GC16P083106	22.2298	https://www.genecards.org/cgi-bin/carddisp.pl?gene=HP
LEPR	Leptin Receptor	Protein Coding	P48357	59	GC01P065438	22.166	https://www.genecards.org/cgi-bin/carddisp.pl?gene=LEPR
PIK3R1	Phosphoinositide-3-Kinase Regulatory Subunit 1	Protein Coding	P27986	60	GC05P068215	22.1427	https://www.genecards.org/cgi-bin/carddisp.pl?gene=PIK3R1
RBP4	Retinol Binding Protein 4	Protein Coding	P02753	54	GC10M093591	22.0265	https://www.genecards.org/cgi-bin/carddisp.pl?gene=RBP4
MIR206	MicroRNA 206	RNA Gene		27	GC06P052144	21.9645	https://www.genecards.org/cgi-bin/carddisp.pl?gene=MIR206
KCNQ1	Potassium Voltage-Gated Channel Subfamily Q Member 1	Protein Coding	P51787	58	GC11P002444	21.9365	https://www.genecards.org/cgi-bin/carddisp.pl?gene=KCNQ1
IGF2-AS	IGF2 Antisense RNA	RNA Gene	Q6U949	34	GC11P002140	21.8035	https://www.genecards.org/cgi-bin/carddisp.pl?gene=IGF2-AS
EIF2AK3	Eukaryotic Translation Initiation Factor 2 Alpha Kinase 3	Protein Coding	Q9NZJ5	58	GC02M088556	21.7604	https://www.genecards.org/cgi-bin/carddisp.pl?gene=EIF2AK3
GLP1R	Glucagon Like Peptide 1 Receptor	Protein Coding	P43220	55	GC06P039048	21.5506	https://www.genecards.org/cgi-bin/carddisp.pl?gene=GLP1R
VWF	Von Willebrand Factor	Protein Coding	P04275	56	GC12M029229	21.4456	https://www.genecards.org/cgi-bin/carddisp.pl?gene=VWF
HHEX	Hematopoietically Expressed Homeobox	Protein Coding	Q03014	49	GC10P092689	21.3828	https://www.genecards.org/cgi-bin/carddisp.pl?gene=HHEX
SELE	Selectin E	Protein Coding	P16581	53	GC01M169722	21.3758	https://www.genecards.org/cgi-bin/carddisp.pl?gene=SELE
EDN1	Endothelin 1	Protein Coding	P05305	58	GC06P012236	21.1588	https://www.genecards.org/cgi-bin/carddisp.pl?gene=EDN1
GAD1	Glutamate Decarboxylase 1	Protein Coding	Q99259	59	GC02P170813	21.0455	https://www.genecards.org/cgi-bin/carddisp.pl?gene=GAD1
POMC	Proopiomelanocortin	Protein Coding	P01189	56	GC02M025160	20.9109	https://www.genecards.org/cgi-bin/carddisp.pl?gene=POMC
BMP6	Bone Morphogenetic Protein 6	Protein Coding	P22004	53	GC06P007726	20.7258	https://www.genecards.org/cgi-bin/carddisp.pl?gene=BMP6
MIR146A	MicroRNA 146a	RNA Gene		29	GC05P160485	20.6039	https://www.genecards.org/cgi-bin/carddisp.pl?gene=MIR146A
AGTR1	Angiotensin II Receptor Type 1	Protein Coding	P30556	60	GC03P148697	20.5706	https://www.genecards.org/cgi-bin/carddisp.pl?gene=AGTR1
IER3IP1	Immediate Early Response 3 Interacting Protein 1	Protein Coding	Q9Y5U9	43	GC18M047152	20.5547	https://www.genecards.org/cgi-bin/carddisp.pl?gene=IER3IP1
NFE2L2	NFE2 Like BZIP Transcription Factor 2	Protein Coding	Q16236	60	GC02M177227	20.5447	https://www.genecards.org/cgi-bin/carddisp.pl?gene=NFE2L2
IGF2	Insulin Like Growth Factor 2	Protein Coding	P01344	58	GC11M011904	20.4356	https://www.genecards.org/cgi-bin/carddisp.pl?gene=IGF2
NLRP3	NLR Family Pyrin Domain Containing 3	Protein Coding	Q96P20	57	GC01P247416	20.2524	https://www.genecards.org/cgi-bin/carddisp.pl?gene=NLRP3
TNFRSF1A	TNF Receptor Superfamily Member 1A	Protein Coding	P19438	59	GC12M006328	20.1839	https://www.genecards.org/cgi-bin/carddisp.pl?gene=TNFRSF1A
MIR30E	MicroRNA 30e	RNA Gene		30	GC01P040754	20.0372	https://www.genecards.org/cgi-bin/carddisp.pl?gene=MIR30E
BDNF-AS	BDNF Antisense RNA	RNA Gene		29	GC11P027466	19.9383	https://www.genecards.org/cgi-bin/carddisp.pl?gene=BDNF-AS
GPT	Glutamic--Pyruvic Transaminase	Protein Coding	P24298	51	GC08P144502	19.9077	https://www.genecards.org/cgi-bin/carddisp.pl?gene=GPT
MIAT	Myocardial Infarction Associated Transcript	RNA Gene		32	GC22P026646	19.8612	https://www.genecards.org/cgi-bin/carddisp.pl?gene=MIAT
BRAF	B-Raf Proto-Oncogene, Serine/Threonine Kinase	Protein Coding	P15056	62	GC07M140773	19.7869	https://www.genecards.org/cgi-bin/carddisp.pl?gene=BRAF
MT-ND1	Mitochondrially Encoded NADH:Ubiquinone Oxidoreductase Core Subunit 1	Protein Coding	P03886	40	GCMTP003309	19.7287	https://www.genecards.org/cgi-bin/carddisp.pl?gene=MT-ND1
HLA-A	Major Histocompatibility Complex, Class I, A	Protein Coding	P04439	54	GC06P134779	19.6327	https://www.genecards.org/cgi-bin/carddisp.pl?gene=HLA-A
PPARA	Peroxisome Proliferator Activated Receptor Alpha	Protein Coding	Q07869	53	GC22P046150	19.6259	https://www.genecards.org/cgi-bin/carddisp.pl?gene=PPARA
UCP2	Uncoupling Protein 2	Protein Coding	P55851	55	GC11M073974	19.6114	https://www.genecards.org/cgi-bin/carddisp.pl?gene=UCP2
IL1A	Interleukin 1 Alpha	Protein Coding	P01583	54	GC02M112773	19.5425	https://www.genecards.org/cgi-bin/carddisp.pl?gene=IL1A
ATM	ATM Serine/Threonine Kinase	Protein Coding	Q13315	61	GC11P108223	19.4735	https://www.genecards.org/cgi-bin/carddisp.pl?gene=ATM
HMOX1	Heme Oxygenase 1	Protein Coding	P09601	61	GC22P035380	19.4381	https://www.genecards.org/cgi-bin/carddisp.pl?gene=HMOX1
EGF	Epidermal Growth Factor	Protein Coding	P01133	60	GC04P109912	19.4332	https://www.genecards.org/cgi-bin/carddisp.pl?gene=EGF
LINC01672	Long Intergenic Non-Protein Coding RNA 1672	RNA Gene		19	GC01P020797	19.4089	https://www.genecards.org/cgi-bin/carddisp.pl?gene=LINC01672
SOD2-OT1	SOD2 Overlapping Transcript 1	RNA Gene		18	GC06M159772	19.2652	https://www.genecards.org/cgi-bin/carddisp.pl?gene=SOD2-OT1
NGF	Nerve Growth Factor	Protein Coding	P01138	60	GC01M115285	19.1963	https://www.genecards.org/cgi-bin/carddisp.pl?gene=NGF
ABCB1	ATP Binding Cassette Subfamily B Member 1	Protein Coding	P08183	60	GC07M087504	19.1865	https://www.genecards.org/cgi-bin/carddisp.pl?gene=ABCB1
MIR26B	MicroRNA 26b	RNA Gene		29	GC02P218402	19.1404	https://www.genecards.org/cgi-bin/carddisp.pl?gene=MIR26B
GCKR	Glucokinase Regulator	Protein Coding	Q14397	48	GC02P027496	19.089	https://www.genecards.org/cgi-bin/carddisp.pl?gene=GCKR
MIR199A1	MicroRNA 199a-1	RNA Gene		26	GC19M010817	19.0389	https://www.genecards.org/cgi-bin/carddisp.pl?gene=MIR199A1
F2	Coagulation Factor II, Thrombin	Protein Coding	P00734	59	GC11P047736	18.947	https://www.genecards.org/cgi-bin/carddisp.pl?gene=F2
PLA2G4A	Phospholipase A2 Group IVA	Protein Coding	P47712	56	GC01P186798	18.8975	https://www.genecards.org/cgi-bin/carddisp.pl?gene=PLA2G4A
MIR223	MicroRNA 223	RNA Gene		29	GC0XP066018	18.858	https://www.genecards.org/cgi-bin/carddisp.pl?gene=MIR223
PLAT	Plasminogen Activator, Tissue Type	Protein Coding	P00750	58	GC08M042174	18.7964	https://www.genecards.org/cgi-bin/carddisp.pl?gene=PLAT
CYP3A4	Cytochrome P450 Family 3 Subfamily A Member 4	Protein Coding	P08684	56	GC07M100029	18.7806	https://www.genecards.org/cgi-bin/carddisp.pl?gene=CYP3A4
JAZF1	JAZF Zinc Finger 1	Protein Coding	Q86VZ6	47	GC07M027830	18.7405	https://www.genecards.org/cgi-bin/carddisp.pl?gene=JAZF1
CBS	Cystathionine Beta-Synthase	Protein Coding	P35520	60	GC21M043053	18.7389	https://www.genecards.org/cgi-bin/carddisp.pl?gene=CBS
BDNF	Brain Derived Neurotrophic Factor	Protein Coding	P23560	58	GC11M027654	18.5527	https://www.genecards.org/cgi-bin/carddisp.pl?gene=BDNF
HRH2	Histamine Receptor H2	Protein Coding	P25021	52	GC05P175659	18.5356	https://www.genecards.org/cgi-bin/carddisp.pl?gene=HRH2
GNAS	GNAS Complex Locus	Protein Coding	P84996	59	GC20P058839	18.4267	https://www.genecards.org/cgi-bin/carddisp.pl?gene=GNAS
STAT1	Signal Transducer And Activator Of Transcription 1	Protein Coding	P42224	61	GC02M190908	18.3656	https://www.genecards.org/cgi-bin/carddisp.pl?gene=STAT1
ELANE	Elastase, Neutrophil Expressed	Protein Coding	P08246	60	GC19P111819	18.3172	https://www.genecards.org/cgi-bin/carddisp.pl?gene=ELANE
CD36	CD36 Molecule (CD36 Blood Group)	Protein Coding	P16671	59	GC07P080369	18.2999	https://www.genecards.org/cgi-bin/carddisp.pl?gene=CD36
SELP	Selectin P	Protein Coding	P16109	54	GC01M169558	18.2979	https://www.genecards.org/cgi-bin/carddisp.pl?gene=SELP
AIRE	Autoimmune Regulator	Protein Coding	O43918	53	GC21P044285	18.1391	https://www.genecards.org/cgi-bin/carddisp.pl?gene=AIRE
CAV1	Caveolin 1	Protein Coding	Q03135	57	GC07P116524	18.1241	https://www.genecards.org/cgi-bin/carddisp.pl?gene=CAV1
PPARGC1A	PPARG Coactivator 1 Alpha	Protein Coding	Q9UBK2	55	GC04M023755	18.0951	https://www.genecards.org/cgi-bin/carddisp.pl?gene=PPARGC1A
C4A	Complement C4A (Chido/Rodgers Blood Group)	Protein Coding	P0C0L4	52	GC06P134843	18.0825	https://www.genecards.org/cgi-bin/carddisp.pl?gene=C4A
MMP1	Matrix Metallopeptidase 1	Protein Coding	P03956	59	GC11M126178	18.077	https://www.genecards.org/cgi-bin/carddisp.pl?gene=MMP1
B2M	Beta-2-Microglobulin	Protein Coding	P61769	59	GC15P044711	18.0666	https://www.genecards.org/cgi-bin/carddisp.pl?gene=B2M
GATA6	GATA Binding Protein 6	Protein Coding	Q92908	55	GC18P022169	18.0456	https://www.genecards.org/cgi-bin/carddisp.pl?gene=GATA6
HGF	Hepatocyte Growth Factor	Protein Coding	P14210	60	GC07M081699	18.0444	https://www.genecards.org/cgi-bin/carddisp.pl?gene=HGF
TNDM	Diabetes Mellitus, Transient Neonatal	Uncategorized		8	GC06U990155	17.9734	https://www.genecards.org/cgi-bin/carddisp.pl?gene=TNDM
DNAJC3	DnaJ Heat Shock Protein Family (Hsp40) Member C3	Protein Coding	Q13217	49	GC13P095677	17.9652	https://www.genecards.org/cgi-bin/carddisp.pl?gene=DNAJC3
HSPA4	Heat Shock Protein Family A (Hsp70) Member 4	Protein Coding	P34932	52	GC05P133062	17.943	https://www.genecards.org/cgi-bin/carddisp.pl?gene=HSPA4
MMP2	Matrix Metallopeptidase 2	Protein Coding	P08253	61	GC16P082389	17.9344	https://www.genecards.org/cgi-bin/carddisp.pl?gene=MMP2
MIR375	MicroRNA 375	RNA Gene		27	GC02M219001	17.8762	https://www.genecards.org/cgi-bin/carddisp.pl?gene=MIR375
CCK	Cholecystokinin	Protein Coding	P06307	51	GC03M042274	17.8741	https://www.genecards.org/cgi-bin/carddisp.pl?gene=CCK
IGF1R	Insulin Like Growth Factor 1 Receptor	Protein Coding	P08069	63	GC15P098648	17.7976	https://www.genecards.org/cgi-bin/carddisp.pl?gene=IGF1R
CERNA3	Competing Endogenous LncRNA 3 For MiR-645	RNA Gene		19	GC08P056323	17.7798	https://www.genecards.org/cgi-bin/carddisp.pl?gene=CERNA3
SCT	Secretin	Protein Coding	P09683	42	GC11M000626	17.6862	https://www.genecards.org/cgi-bin/carddisp.pl?gene=SCT
HIF1A	Hypoxia Inducible Factor 1 Subunit Alpha	Protein Coding	Q16665	57	GC14P061695	17.676	https://www.genecards.org/cgi-bin/carddisp.pl?gene=HIF1A
TTR	Transthyretin	Protein Coding	P02766	57	GC18P031557	17.6636	https://www.genecards.org/cgi-bin/carddisp.pl?gene=TTR
MIR122	MicroRNA 122	RNA Gene		29	GC18P058451	17.6279	https://www.genecards.org/cgi-bin/carddisp.pl?gene=MIR122
IFNG-AS1	IFNG Antisense RNA 1	RNA Gene		26	GC12P067989	17.5901	https://www.genecards.org/cgi-bin/carddisp.pl?gene=IFNG-AS1
CXCL10	C-X-C Motif Chemokine Ligand 10	Protein Coding	P02778	53	GC04M076021	17.5429	https://www.genecards.org/cgi-bin/carddisp.pl?gene=CXCL10
F5	Coagulation Factor V	Protein Coding	P12259	56	GC01M169511	17.5397	https://www.genecards.org/cgi-bin/carddisp.pl?gene=F5
CFTR	CF Transmembrane Conductance Regulator	Protein Coding	P13569	61	GC07P117287	17.5186	https://www.genecards.org/cgi-bin/carddisp.pl?gene=CFTR
G6PD	Glucose-6-Phosphate Dehydrogenase	Protein Coding	P11413	59	GC0XM154598	17.4834	https://www.genecards.org/cgi-bin/carddisp.pl?gene=G6PD
IGFBP1	Insulin Like Growth Factor Binding Protein 1	Protein Coding	P08833	52	GC07P049577	17.472	https://www.genecards.org/cgi-bin/carddisp.pl?gene=IGFBP1
IGFBP3	Insulin Like Growth Factor Binding Protein 3	Protein Coding	P17936	55	GC07M045912	17.4542	https://www.genecards.org/cgi-bin/carddisp.pl?gene=IGFBP3
FASLG	Fas Ligand	Protein Coding	P48023	57	GC01P172659	17.4288	https://www.genecards.org/cgi-bin/carddisp.pl?gene=FASLG
S100A8	S100 Calcium Binding Protein A8	Protein Coding	P05109	51	GC01M160881	17.4015	https://www.genecards.org/cgi-bin/carddisp.pl?gene=S100A8
SLC5A2	Solute Carrier Family 5 Member 2	Protein Coding	P31639	56	GC16P081737	17.3796	https://www.genecards.org/cgi-bin/carddisp.pl?gene=SLC5A2
SHBG	Sex Hormone Binding Globulin	Protein Coding	P04278	51	GC17P007613	17.2705	https://www.genecards.org/cgi-bin/carddisp.pl?gene=SHBG
REN	Renin	Protein Coding	P00797	58	GC01M204154	17.2665	https://www.genecards.org/cgi-bin/carddisp.pl?gene=REN
PCSK1	Proprotein Convertase Subtilisin/Kexin Type 1	Protein Coding	P29120	59	GC05M096391	17.2419	https://www.genecards.org/cgi-bin/carddisp.pl?gene=PCSK1
BGLAP	Bone Gamma-Carboxyglutamate Protein	Protein Coding	P02818	49	GC01P156242	17.2339	https://www.genecards.org/cgi-bin/carddisp.pl?gene=BGLAP
IL12B	Interleukin 12B	Protein Coding	P29460	54	GC05M159314	17.1963	https://www.genecards.org/cgi-bin/carddisp.pl?gene=IL12B
F3	Coagulation Factor III, Tissue Factor	Protein Coding	P13726	54	GC01M094873	17.1833	https://www.genecards.org/cgi-bin/carddisp.pl?gene=F3
MIR216A	MicroRNA 216a	RNA Gene		27	GC02M055988	17.0978	https://www.genecards.org/cgi-bin/carddisp.pl?gene=MIR216A
MIF	Macrophage Migration Inhibitory Factor	Protein Coding	P14174	56	GC22P023894	17.0777	https://www.genecards.org/cgi-bin/carddisp.pl?gene=MIF
TF	Transferrin	Protein Coding	P02787	59	GC03P139072	17.0627	https://www.genecards.org/cgi-bin/carddisp.pl?gene=TF
NR3C1	Nuclear Receptor Subfamily 3 Group C Member 1	Protein Coding	P04150	58	GC05M143277	17.0426	https://www.genecards.org/cgi-bin/carddisp.pl?gene=NR3C1
MIR146B	MicroRNA 146b	RNA Gene		29	GC10P102436	16.9865	https://www.genecards.org/cgi-bin/carddisp.pl?gene=MIR146B
TNFRSF11B	TNF Receptor Superfamily Member 11b	Protein Coding	O00300	56	GC08M118923	16.9116	https://www.genecards.org/cgi-bin/carddisp.pl?gene=TNFRSF11B
FLT1	Fms Related Receptor Tyrosine Kinase 1	Protein Coding	P17948	59	GC13M028300	16.8671	https://www.genecards.org/cgi-bin/carddisp.pl?gene=FLT1
PTEN	Phosphatase And Tensin Homolog	Protein Coding	P60484	61	GC10P109367	16.8474	https://www.genecards.org/cgi-bin/carddisp.pl?gene=PTEN
MIR210	MicroRNA 210	RNA Gene		28	GC11M011821	16.8384	https://www.genecards.org/cgi-bin/carddisp.pl?gene=MIR210
SIRT1	Sirtuin 1	Protein Coding	Q96EB6	58	GC10P067884	16.8249	https://www.genecards.org/cgi-bin/carddisp.pl?gene=SIRT1
EGFR	Epidermal Growth Factor Receptor	Protein Coding	P00533	63	GC07P055019	16.8229	https://www.genecards.org/cgi-bin/carddisp.pl?gene=EGFR
CD4	CD4 Molecule	Protein Coding	P01730	59	GC12P006786	16.8051	https://www.genecards.org/cgi-bin/carddisp.pl?gene=CD4
GSR	Glutathione-Disulfide Reductase	Protein Coding	P00390	59	GC08M030678	16.8041	https://www.genecards.org/cgi-bin/carddisp.pl?gene=GSR
MIR27A	MicroRNA 27a	RNA Gene		30	GC19M092209	16.7876	https://www.genecards.org/cgi-bin/carddisp.pl?gene=MIR27A
PTGS1	Prostaglandin-Endoperoxide Synthase 1	Protein Coding	P23219	55	GC09P122370	16.7803	https://www.genecards.org/cgi-bin/carddisp.pl?gene=PTGS1
HBA1	Hemoglobin Subunit Alpha 1	Protein Coding	P69905	51	GC16P080149	16.7167	https://www.genecards.org/cgi-bin/carddisp.pl?gene=HBA1
NAMPT	Nicotinamide Phosphoribosyltransferase	Protein Coding	P43490	55	GC07M106248	16.7152	https://www.genecards.org/cgi-bin/carddisp.pl?gene=NAMPT
GGT1	Gamma-Glutamyltransferase 1	Protein Coding	P19440	58	GC22P024583	16.6687	https://www.genecards.org/cgi-bin/carddisp.pl?gene=GGT1
IL13	Interleukin 13	Protein Coding	P35225	53	GC05P132656	16.6515	https://www.genecards.org/cgi-bin/carddisp.pl?gene=IL13
MBL2	Mannose Binding Lectin 2	Protein Coding	P11226	55	GC10M052760	16.6317	https://www.genecards.org/cgi-bin/carddisp.pl?gene=MBL2
SMAD4	SMAD Family Member 4	Protein Coding	Q13485	61	GC18P051028	16.6228	https://www.genecards.org/cgi-bin/carddisp.pl?gene=SMAD4
LCN2	Lipocalin 2	Protein Coding	P80188	54	GC09P128149	16.4953	https://www.genecards.org/cgi-bin/carddisp.pl?gene=LCN2
GPR35	G Protein-Coupled Receptor 35	Protein Coding	Q9HC97	51	GC02P240605	16.4814	https://www.genecards.org/cgi-bin/carddisp.pl?gene=GPR35
PDGFB	Platelet Derived Growth Factor Subunit B	Protein Coding	P01127	60	GC22M077951	16.4319	https://www.genecards.org/cgi-bin/carddisp.pl?gene=PDGFB
IDE	Insulin Degrading Enzyme	Protein Coding	P14735	57	GC10M092451	16.4021	https://www.genecards.org/cgi-bin/carddisp.pl?gene=IDE
PRL	Prolactin	Protein Coding	P01236	53	GC06M022287	16.3814	https://www.genecards.org/cgi-bin/carddisp.pl?gene=PRL
CCN2	Cellular Communication Network Factor 2	Protein Coding	P29279	54	GC06M131948	16.3274	https://www.genecards.org/cgi-bin/carddisp.pl?gene=CCN2
CD40LG	CD40 Ligand	Protein Coding	P29965	59	GC0XP136649	16.2882	https://www.genecards.org/cgi-bin/carddisp.pl?gene=CD40LG
MEFV	MEFV Innate Immunity Regulator, Pyrin	Protein Coding	O15553	53	GC16M020459	16.2565	https://www.genecards.org/cgi-bin/carddisp.pl?gene=MEFV
SLC2A1	Solute Carrier Family 2 Member 1	Protein Coding	P11166	62	GC01M042925	16.2347	https://www.genecards.org/cgi-bin/carddisp.pl?gene=SLC2A1
PLG	Plasminogen	Protein Coding	P00747	58	GC06P160702	16.2242	https://www.genecards.org/cgi-bin/carddisp.pl?gene=PLG
PDCD1	Programmed Cell Death 1	Protein Coding	Q15116	56	GC02M241849	16.1842	https://www.genecards.org/cgi-bin/carddisp.pl?gene=PDCD1
JAK2	Janus Kinase 2	Protein Coding	O60674	62	GC09P004985	16.0737	https://www.genecards.org/cgi-bin/carddisp.pl?gene=JAK2
MICA	MHC Class I Polypeptide-Related Sequence A	Protein Coding	Q29983	47	GC06P031399	16.068	https://www.genecards.org/cgi-bin/carddisp.pl?gene=MICA
THBD	Thrombomodulin	Protein Coding	P07204	55	GC20M023026	16.0309	https://www.genecards.org/cgi-bin/carddisp.pl?gene=THBD
ADA2	Adenosine Deaminase 2	Protein Coding	Q9NZK5	50	GC22M017316	16.0265	https://www.genecards.org/cgi-bin/carddisp.pl?gene=ADA2
TIMP1	TIMP Metallopeptidase Inhibitor 1	Protein Coding	P01033	54	GC0XP057483	15.9693	https://www.genecards.org/cgi-bin/carddisp.pl?gene=TIMP1
IL1R1	Interleukin 1 Receptor Type 1	Protein Coding	P14778	56	GC02P102136	15.9195	https://www.genecards.org/cgi-bin/carddisp.pl?gene=IL1R1
GSTM1	Glutathione S-Transferase Mu 1	Protein Coding	P09488	51	GC01P109687	15.9168	https://www.genecards.org/cgi-bin/carddisp.pl?gene=GSTM1
TAP2	Transporter 2, ATP Binding Cassette Subfamily B Member	Protein Coding	Q03519	53	GC06M032821	15.9154	https://www.genecards.org/cgi-bin/carddisp.pl?gene=TAP2
G6PC1	Glucose-6-Phosphatase Catalytic Subunit 1	Protein Coding	P35575	52	GC17P113706	15.8977	https://www.genecards.org/cgi-bin/carddisp.pl?gene=G6PC1
MIR20A	MicroRNA 20a	RNA Gene		27	GC13P091681	15.886	https://www.genecards.org/cgi-bin/carddisp.pl?gene=MIR20A
STAT4	Signal Transducer And Activator Of Transcription 4	Protein Coding	Q14765	55	GC02M191029	15.8355	https://www.genecards.org/cgi-bin/carddisp.pl?gene=STAT4
MIR197	MicroRNA 197	RNA Gene		26	GC01P109598	15.8097	https://www.genecards.org/cgi-bin/carddisp.pl?gene=MIR197
DNAH8	Dynein Axonemal Heavy Chain 8	Protein Coding	Q96JB1	47	GC06P135004	15.7667	https://www.genecards.org/cgi-bin/carddisp.pl?gene=DNAH8
ESR1	Estrogen Receptor 1	Protein Coding	P03372	62	GC06P151656	15.7492	https://www.genecards.org/cgi-bin/carddisp.pl?gene=ESR1
HLA-DPB1	Major Histocompatibility Complex, Class II, DP Beta 1	Protein Coding	P04440	53	GC06P134859	15.7346	https://www.genecards.org/cgi-bin/carddisp.pl?gene=HLA-DPB1
TNFAIP3	TNF Alpha Induced Protein 3	Protein Coding	P21580	57	GC06P137866	15.7305	https://www.genecards.org/cgi-bin/carddisp.pl?gene=TNFAIP3
MIR221	MicroRNA 221	RNA Gene		27	GC0XM045746	15.7059	https://www.genecards.org/cgi-bin/carddisp.pl?gene=MIR221
SERPINC1	Serpin Family C Member 1	Protein Coding	P01008	59	GC01M174949	15.638	https://www.genecards.org/cgi-bin/carddisp.pl?gene=SERPINC1
TNFRSF1B	TNF Receptor Superfamily Member 1B	Protein Coding	P20333	57	GC01P040409	15.6357	https://www.genecards.org/cgi-bin/carddisp.pl?gene=TNFRSF1B
MIR142	MicroRNA 142	RNA Gene		29	GC17M058331	15.6248	https://www.genecards.org/cgi-bin/carddisp.pl?gene=MIR142
CETP	Cholesteryl Ester Transfer Protein	Protein Coding	P11597	55	GC16P056961	15.6164	https://www.genecards.org/cgi-bin/carddisp.pl?gene=CETP
FOS	Fos Proto-Oncogene, AP-1 Transcription Factor Subunit	Protein Coding	P01100	59	GC14P075278	15.5378	https://www.genecards.org/cgi-bin/carddisp.pl?gene=FOS
NPPB	Natriuretic Peptide B	Protein Coding	P16860	52	GC01M014525	15.5234	https://www.genecards.org/cgi-bin/carddisp.pl?gene=NPPB
TERT	Telomerase Reverse Transcriptase	Protein Coding	O14746	60	GC05M001253	15.4817	https://www.genecards.org/cgi-bin/carddisp.pl?gene=TERT
GH1	Growth Hormone 1	Protein Coding	P01241	52	GC17M063917	15.4771	https://www.genecards.org/cgi-bin/carddisp.pl?gene=GH1
MIR143	MicroRNA 143	RNA Gene		31	GC05P152355	15.4383	https://www.genecards.org/cgi-bin/carddisp.pl?gene=MIR143
CYP2C9	Cytochrome P450 Family 2 Subfamily C Member 9	Protein Coding	P11712	55	GC10P094938	15.4089	https://www.genecards.org/cgi-bin/carddisp.pl?gene=CYP2C9
RELA	RELA Proto-Oncogene, NF-KB Subunit	Protein Coding	Q04206	60	GC11M065653	15.3941	https://www.genecards.org/cgi-bin/carddisp.pl?gene=RELA
NAGLU	N-Acetyl-Alpha-Glucosaminidase	Protein Coding	P54802	52	GC17P112331	15.3855	https://www.genecards.org/cgi-bin/carddisp.pl?gene=NAGLU
MIR132	MicroRNA 132	RNA Gene		29	GC17M002049	15.3649	https://www.genecards.org/cgi-bin/carddisp.pl?gene=MIR132
POLR1C	RNA Polymerase I And III Subunit C	Protein Coding	O15160	53	GC06P135045	15.3415	https://www.genecards.org/cgi-bin/carddisp.pl?gene=POLR1C
BTNL2	Butyrophilin Like 2	Protein Coding	Q9UIR0	48	GC06M032393	15.3363	https://www.genecards.org/cgi-bin/carddisp.pl?gene=BTNL2
MIR200B	MicroRNA 200b	RNA Gene		28	GC01P001167	15.3156	https://www.genecards.org/cgi-bin/carddisp.pl?gene=MIR200B
MST1	Macrophage Stimulating 1	Protein Coding	P26927	53	GC03M049683	15.2826	https://www.genecards.org/cgi-bin/carddisp.pl?gene=MST1
MTOR	Mechanistic Target Of Rapamycin Kinase	Protein Coding	P42345	64	GC01M011106	15.2348	https://www.genecards.org/cgi-bin/carddisp.pl?gene=MTOR
MAPK1	Mitogen-Activated Protein Kinase 1	Protein Coding	P28482	61	GC22M021759	15.223	https://www.genecards.org/cgi-bin/carddisp.pl?gene=MAPK1
SOCS3	Suppressor Of Cytokine Signaling 3	Protein Coding	O14543	52	GC17M078356	15.2195	https://www.genecards.org/cgi-bin/carddisp.pl?gene=SOCS3
PRKCB	Protein Kinase C Beta	Protein Coding	P05771	58	GC16P081181	15.1458	https://www.genecards.org/cgi-bin/carddisp.pl?gene=PRKCB
ICA1	Islet Cell Autoantigen 1	Protein Coding	Q05084	49	GC07M009372	15.0918	https://www.genecards.org/cgi-bin/carddisp.pl?gene=ICA1
CALCA	Calcitonin Related Polypeptide Alpha	Protein Coding	P06881	52	GC11M014966	15.0785	https://www.genecards.org/cgi-bin/carddisp.pl?gene=CALCA
MMP3	Matrix Metallopeptidase 3	Protein Coding	P08254	59	GC11M102835	15.0618	https://www.genecards.org/cgi-bin/carddisp.pl?gene=MMP3
LEPQTL1	Leptin, Serum Levels Of	Genetic Locus		10	GC02U903086	15.0611	https://www.genecards.org/cgi-bin/carddisp.pl?gene=LEPQTL1
APOC3	Apolipoprotein C3	Protein Coding	P02656	54	GC11P116829	15.0573	https://www.genecards.org/cgi-bin/carddisp.pl?gene=APOC3
GHR	Growth Hormone Receptor	Protein Coding	P10912	55	GC05P042429	15.0376	https://www.genecards.org/cgi-bin/carddisp.pl?gene=GHR
MIR15A	MicroRNA 15a	RNA Gene		23	GC13M050049	14.9812	https://www.genecards.org/cgi-bin/carddisp.pl?gene=MIR15A
MIR195	MicroRNA 195	RNA Gene		26	GC17M074818	14.9746	https://www.genecards.org/cgi-bin/carddisp.pl?gene=MIR195
LTF	Lactotransferrin	Protein Coding	P02788	54	GC03M046435	14.9655	https://www.genecards.org/cgi-bin/carddisp.pl?gene=LTF
KCNQ1OT1	KCNQ1 Opposite Strand/Antisense Transcript 1	RNA Gene		34	GC11M011926	14.9518	https://www.genecards.org/cgi-bin/carddisp.pl?gene=KCNQ1OT1
TAP1	Transporter 1, ATP Binding Cassette Subfamily B Member	Protein Coding	Q03518	56	GC06M093850	14.9118	https://www.genecards.org/cgi-bin/carddisp.pl?gene=TAP1
PTPN2	Protein Tyrosine Phosphatase Non-Receptor Type 2	Protein Coding	P17706	55	GC18M033992	14.9085	https://www.genecards.org/cgi-bin/carddisp.pl?gene=PTPN2
PIK3CG	Phosphatidylinositol-4,5-Bisphosphate 3-Kinase Catalytic Subunit Gamma	Protein Coding	P48736	58	GC07P106865	14.8935	https://www.genecards.org/cgi-bin/carddisp.pl?gene=PIK3CG
NEAT1	Nuclear Paraspeckle Assembly Transcript 1	RNA Gene		32	GC11P089078	14.8183	https://www.genecards.org/cgi-bin/carddisp.pl?gene=NEAT1
HAMP	Hepcidin Antimicrobial Peptide	Protein Coding	P81172	52	GC19P112928	14.8012	https://www.genecards.org/cgi-bin/carddisp.pl?gene=HAMP
MIR214	MicroRNA 214	RNA Gene		29	GC01M172234	14.7698	https://www.genecards.org/cgi-bin/carddisp.pl?gene=MIR214
IL10RA	Interleukin 10 Receptor Subunit Alpha	Protein Coding	Q13651	53	GC11P117993	14.7543	https://www.genecards.org/cgi-bin/carddisp.pl?gene=IL10RA
G6PC2	Glucose-6-Phosphatase Catalytic Subunit 2	Protein Coding	Q9NQR9	46	GC02P168901	14.723	https://www.genecards.org/cgi-bin/carddisp.pl?gene=G6PC2
SPP1	Secreted Phosphoprotein 1	Protein Coding	P10451	54	GC04P087975	14.7073	https://www.genecards.org/cgi-bin/carddisp.pl?gene=SPP1
BMP2	Bone Morphogenetic Protein 2	Protein Coding	P12643	55	GC20P006767	14.6782	https://www.genecards.org/cgi-bin/carddisp.pl?gene=BMP2
MIR148A	MicroRNA 148a	RNA Gene		27	GC07M025950	14.6742	https://www.genecards.org/cgi-bin/carddisp.pl?gene=MIR148A
MIR22	MicroRNA 22	RNA Gene		29	GC17M001713	14.6248	https://www.genecards.org/cgi-bin/carddisp.pl?gene=MIR22
BCL2	BCL2 Apoptosis Regulator	Protein Coding	P10415	59	GC18M063123	14.6238	https://www.genecards.org/cgi-bin/carddisp.pl?gene=BCL2
MEG8	Maternally Expressed 8, Small Nucleolar RNA Host Gene	RNA Gene		26	GC14P116736	14.6202	https://www.genecards.org/cgi-bin/carddisp.pl?gene=MEG8
CYBA	Cytochrome B-245 Alpha Chain	Protein Coding	P13498	55	GC16M088643	14.6112	https://www.genecards.org/cgi-bin/carddisp.pl?gene=CYBA
AOC3	Amine Oxidase Copper Containing 3	Protein Coding	Q16853	54	GC17P042851	14.6093	https://www.genecards.org/cgi-bin/carddisp.pl?gene=AOC3
MIR200C	MicroRNA 200c	RNA Gene		29	GC12P038995	14.5794	https://www.genecards.org/cgi-bin/carddisp.pl?gene=MIR200C
HSPD1	Heat Shock Protein Family D (Hsp60) Member 1	Protein Coding	P10809	58	GC02M197486	14.5145	https://www.genecards.org/cgi-bin/carddisp.pl?gene=HSPD1
NPPA	Natriuretic Peptide A	Protein Coding	P01160	53	GC01M014524	14.5081	https://www.genecards.org/cgi-bin/carddisp.pl?gene=NPPA
IRF5	Interferon Regulatory Factor 5	Protein Coding	Q13568	55	GC07P128937	14.5	https://www.genecards.org/cgi-bin/carddisp.pl?gene=IRF5
CCL5	C-C Motif Chemokine Ligand 5	Protein Coding	P13501	52	GC17M035871	14.4881	https://www.genecards.org/cgi-bin/carddisp.pl?gene=CCL5
HBB	Hemoglobin Subunit Beta	Protein Coding	P68871	54	GC11M012029	14.4831	https://www.genecards.org/cgi-bin/carddisp.pl?gene=HBB
FABP2	Fatty Acid Binding Protein 2	Protein Coding	P12104	50	GC04M119317	14.4544	https://www.genecards.org/cgi-bin/carddisp.pl?gene=FABP2
SERPINF1	Serpin Family F Member 1	Protein Coding	P36955	54	GC17P110885	14.4379	https://www.genecards.org/cgi-bin/carddisp.pl?gene=SERPINF1
MLN	Motilin	Protein Coding	P12872	43	GC06M033794	14.4303	https://www.genecards.org/cgi-bin/carddisp.pl?gene=MLN
ITGAM	Integrin Subunit Alpha M	Protein Coding	P11215	56	GC16P081706	14.3977	https://www.genecards.org/cgi-bin/carddisp.pl?gene=ITGAM
KRAS	KRAS Proto-Oncogene, GTPase	Protein Coding	P01116	61	GC12M029682	14.3786	https://www.genecards.org/cgi-bin/carddisp.pl?gene=KRAS
IL6R	Interleukin 6 Receptor	Protein Coding	P08887	59	GC01P154405	14.3657	https://www.genecards.org/cgi-bin/carddisp.pl?gene=IL6R
MIR483	MicroRNA 483	RNA Gene		27	GC11M011909	14.3616	https://www.genecards.org/cgi-bin/carddisp.pl?gene=MIR483
NPY	Neuropeptide Y	Protein Coding	P01303	53	GC07P024290	14.3297	https://www.genecards.org/cgi-bin/carddisp.pl?gene=NPY
ABCA1	ATP Binding Cassette Subfamily A Member 1	Protein Coding	O95477	58	GC09M104781	14.3209	https://www.genecards.org/cgi-bin/carddisp.pl?gene=ABCA1
CXCL12	C-X-C Motif Chemokine Ligand 12	Protein Coding	P48061	54	GC10M044370	14.3023	https://www.genecards.org/cgi-bin/carddisp.pl?gene=CXCL12
ACE2	Angiotensin Converting Enzyme 2	Protein Coding	Q9BYF1	58	GC0XM015494	14.2994	https://www.genecards.org/cgi-bin/carddisp.pl?gene=ACE2
MIR424	MicroRNA 424	RNA Gene		26	GC0XM134753	14.2886	https://www.genecards.org/cgi-bin/carddisp.pl?gene=MIR424
MIR200A	MicroRNA 200a	RNA Gene		27	GC01P020464	14.2773	https://www.genecards.org/cgi-bin/carddisp.pl?gene=MIR200A
PGF	Placental Growth Factor	Protein Coding	P49763	53	GC14M074941	14.2344	https://www.genecards.org/cgi-bin/carddisp.pl?gene=PGF
TAC1	Tachykinin Precursor 1	Protein Coding	P20366	50	GC07P097734	14.2163	https://www.genecards.org/cgi-bin/carddisp.pl?gene=TAC1
MIR24-1	MicroRNA 24-1	RNA Gene		25	GC09P095086	14.2044	https://www.genecards.org/cgi-bin/carddisp.pl?gene=MIR24-1
HMGCR	3-Hydroxy-3-Methylglutaryl-CoA Reductase	Protein Coding	P04035	56	GC05P075336	14.1952	https://www.genecards.org/cgi-bin/carddisp.pl?gene=HMGCR
IL5	Interleukin 5	Protein Coding	P05113	54	GC05M132541	14.1746	https://www.genecards.org/cgi-bin/carddisp.pl?gene=IL5
RARRES2	Retinoic Acid Receptor Responder 2	Protein Coding	Q99969	48	GC07M150333	14.1351	https://www.genecards.org/cgi-bin/carddisp.pl?gene=RARRES2
PALB2	Partner And Localizer Of BRCA2	Protein Coding	Q86YC2	53	GC16M023603	14.1169	https://www.genecards.org/cgi-bin/carddisp.pl?gene=PALB2
PRTN3	Proteinase 3	Protein Coding	P24158	54	GC19P000840	14.0873	https://www.genecards.org/cgi-bin/carddisp.pl?gene=PRTN3
CASP3	Caspase 3	Protein Coding	P42574	58	GC04M184627	14.0856	https://www.genecards.org/cgi-bin/carddisp.pl?gene=CASP3
FOXC2	Forkhead Box C2	Protein Coding	Q99958	53	GC16P094764	14.0675	https://www.genecards.org/cgi-bin/carddisp.pl?gene=FOXC2
MIR31	MicroRNA 31	RNA Gene		27	GC09M022147	14.0346	https://www.genecards.org/cgi-bin/carddisp.pl?gene=MIR31
MIR30A	MicroRNA 30a	RNA Gene		26	GC06M071403	14.0209	https://www.genecards.org/cgi-bin/carddisp.pl?gene=MIR30A
CYP2D6	Cytochrome P450 Family 2 Subfamily D Member 6	Protein Coding	P10635	56	GC22M042126	14.0193	https://www.genecards.org/cgi-bin/carddisp.pl?gene=CYP2D6
EP300	E1A Binding Protein P300	Protein Coding	Q09472	61	GC22P070686	14.0187	https://www.genecards.org/cgi-bin/carddisp.pl?gene=EP300
APC	APC Regulator Of WNT Signaling Pathway	Protein Coding	P25054	58	GC05P112707	13.9858	https://www.genecards.org/cgi-bin/carddisp.pl?gene=APC
CCL11	C-C Motif Chemokine Ligand 11	Protein Coding	P51671	54	GC17P034285	13.9828	https://www.genecards.org/cgi-bin/carddisp.pl?gene=CCL11
ACP1	Acid Phosphatase 1	Protein Coding	P24666	52	GC02P000841	13.9827	https://www.genecards.org/cgi-bin/carddisp.pl?gene=ACP1
CST3	Cystatin C	Protein Coding	P01034	53	GC20M023930	13.9609	https://www.genecards.org/cgi-bin/carddisp.pl?gene=CST3
MIR150	MicroRNA 150	RNA Gene		29	GC19M049500	13.9532	https://www.genecards.org/cgi-bin/carddisp.pl?gene=MIR150
PCBD1	Pterin-4 Alpha-Carbinolamine Dehydratase 1	Protein Coding	P61457	53	GC10M070882	13.8929	https://www.genecards.org/cgi-bin/carddisp.pl?gene=PCBD1
HLA-C	Major Histocompatibility Complex, Class I, C	Protein Coding	P10321	53	GC06M093737	13.8714	https://www.genecards.org/cgi-bin/carddisp.pl?gene=HLA-C
SNHG6	Small Nucleolar RNA Host Gene 6	RNA Gene		26	GC08M066921	13.838	https://www.genecards.org/cgi-bin/carddisp.pl?gene=SNHG6
LPA	Lipoprotein(A)	Protein Coding	P08519	50	GC06M160531	13.8156	https://www.genecards.org/cgi-bin/carddisp.pl?gene=LPA
CD40	CD40 Molecule	Protein Coding	P25942	59	GC20P046118	13.7492	https://www.genecards.org/cgi-bin/carddisp.pl?gene=CD40
GIP	Gastric Inhibitory Polypeptide	Protein Coding	P09681	46	GC17M048958	13.7358	https://www.genecards.org/cgi-bin/carddisp.pl?gene=GIP
CASR	Calcium Sensing Receptor	Protein Coding	P41180	60	GC03P122183	13.7306	https://www.genecards.org/cgi-bin/carddisp.pl?gene=CASR
SELL	Selectin L	Protein Coding	P14151	52	GC01M169690	13.728	https://www.genecards.org/cgi-bin/carddisp.pl?gene=SELL
ADRB2	Adrenoceptor Beta 2	Protein Coding	P07550	57	GC05P152320	13.7008	https://www.genecards.org/cgi-bin/carddisp.pl?gene=ADRB2
STK11	Serine/Threonine Kinase 11	Protein Coding	Q15831	59	GC19P001177	13.6991	https://www.genecards.org/cgi-bin/carddisp.pl?gene=STK11
ST3GAL4	ST3 Beta-Galactoside Alpha-2,3-Sialyltransferase 4	Protein Coding	Q11206	51	GC11P126355	13.6935	https://www.genecards.org/cgi-bin/carddisp.pl?gene=ST3GAL4
XDH	Xanthine Dehydrogenase	Protein Coding	P47989	56	GC02M031334	13.6867	https://www.genecards.org/cgi-bin/carddisp.pl?gene=XDH
IGFBP2	Insulin Like Growth Factor Binding Protein 2	Protein Coding	P18065	53	GC02P216632	13.6761	https://www.genecards.org/cgi-bin/carddisp.pl?gene=IGFBP2
MIRLET7D	MicroRNA Let-7d	RNA Gene		29	GC09P094178	13.6706	https://www.genecards.org/cgi-bin/carddisp.pl?gene=MIRLET7D
YIPF5	Yip1 Domain Family Member 5	Protein Coding	Q969M3	46	GC05M144158	13.6673	https://www.genecards.org/cgi-bin/carddisp.pl?gene=YIPF5
MIR139	MicroRNA 139	RNA Gene		28	GC11M072615	13.6645	https://www.genecards.org/cgi-bin/carddisp.pl?gene=MIR139
MSR1	Macrophage Scavenger Receptor 1	Protein Coding	P21757	54	GC08M016107	13.6637	https://www.genecards.org/cgi-bin/carddisp.pl?gene=MSR1
PLA2G7	Phospholipase A2 Group VII	Protein Coding	Q13093	59	GC06M046704	13.629	https://www.genecards.org/cgi-bin/carddisp.pl?gene=PLA2G7
MAPK14	Mitogen-Activated Protein Kinase 14	Protein Coding	Q16539	60	GC06P134977	13.6243	https://www.genecards.org/cgi-bin/carddisp.pl?gene=MAPK14
CDC123	Cell Division Cycle 123	Protein Coding	O75794	45	GC10P012195	13.6154	https://www.genecards.org/cgi-bin/carddisp.pl?gene=CDC123
MAPK8	Mitogen-Activated Protein Kinase 8	Protein Coding	P45983	58	GC10P048306	13.6019	https://www.genecards.org/cgi-bin/carddisp.pl?gene=MAPK8
ATG16L1	Autophagy Related 16 Like 1	Protein Coding	Q676U5	51	GC02P233280	13.6004	https://www.genecards.org/cgi-bin/carddisp.pl?gene=ATG16L1
KNG1	Kininogen 1	Protein Coding	P01042	56	GC03P186717	13.592	https://www.genecards.org/cgi-bin/carddisp.pl?gene=KNG1
IL12A	Interleukin 12A	Protein Coding	P29459	52	GC03P159988	13.5621	https://www.genecards.org/cgi-bin/carddisp.pl?gene=IL12A
MLXIPL	MLX Interacting Protein Like	Protein Coding	Q9NP71	52	GC07M073593	13.5526	https://www.genecards.org/cgi-bin/carddisp.pl?gene=MLXIPL
MIR23A	MicroRNA 23a	RNA Gene		28	GC19M092210	13.5424	https://www.genecards.org/cgi-bin/carddisp.pl?gene=MIR23A
CAVIN1	Caveolae Associated Protein 1	Protein Coding	Q6NZI2	51	GC17M077716	13.5404	https://www.genecards.org/cgi-bin/carddisp.pl?gene=CAVIN1
CHGA	Chromogranin A	Protein Coding	P10645	53	GC14P092990	13.5191	https://www.genecards.org/cgi-bin/carddisp.pl?gene=CHGA
PARP1	Poly(ADP-Ribose) Polymerase 1	Protein Coding	P09874	59	GC01M226360	13.5055	https://www.genecards.org/cgi-bin/carddisp.pl?gene=PARP1
MIR99A	MicroRNA 99a	RNA Gene		28	GC21P016539	13.4708	https://www.genecards.org/cgi-bin/carddisp.pl?gene=MIR99A
SREBF1	Sterol Regulatory Element Binding Transcription Factor 1	Protein Coding	P36956	58	GC17M017810	13.463	https://www.genecards.org/cgi-bin/carddisp.pl?gene=SREBF1
PGR-AS1	PGR Antisense RNA 1	RNA Gene		18	GC11P101131	13.4589	https://www.genecards.org/cgi-bin/carddisp.pl?gene=PGR-AS1
TMX2-CTNND1	TMX2-CTNND1 Readthrough (NMD Candidate)	RNA Gene		23	GC11P057712	13.4549	https://www.genecards.org/cgi-bin/carddisp.pl?gene=TMX2-CTNND1
AHSG	Alpha 2-HS Glycoprotein	Protein Coding	P02765	53	GC03P186658	13.4269	https://www.genecards.org/cgi-bin/carddisp.pl?gene=AHSG
IL22	Interleukin 22	Protein Coding	Q9GZX6	51	GC12M068248	13.4137	https://www.genecards.org/cgi-bin/carddisp.pl?gene=IL22
LDLR	Low Density Lipoprotein Receptor	Protein Coding	P01130	60	GC19P112317	13.356	https://www.genecards.org/cgi-bin/carddisp.pl?gene=LDLR
MIR181A2	MicroRNA 181a-2	RNA Gene		27	GC09P124692	13.2987	https://www.genecards.org/cgi-bin/carddisp.pl?gene=MIR181A2
NR1H2	Nuclear Receptor Subfamily 1 Group H Member 2	Protein Coding	P55055	54	GC19P050329	13.2082	https://www.genecards.org/cgi-bin/carddisp.pl?gene=NR1H2
MIR191	MicroRNA 191	RNA Gene		29	GC03M053710	13.195	https://www.genecards.org/cgi-bin/carddisp.pl?gene=MIR191
FCGR2A	Fc Gamma Receptor IIa	Protein Coding	P12318	56	GC01P161505	13.1944	https://www.genecards.org/cgi-bin/carddisp.pl?gene=FCGR2A
HRAS	HRas Proto-Oncogene, GTPase	Protein Coding	P01112	61	GC11M011817	13.1679	https://www.genecards.org/cgi-bin/carddisp.pl?gene=HRAS
NOTCH2	Notch Receptor 2	Protein Coding	Q04721	59	GC01M119911	13.1436	https://www.genecards.org/cgi-bin/carddisp.pl?gene=NOTCH2
PON2	Paraoxonase 2	Protein Coding	Q15165	52	GC07M095404	13.1408	https://www.genecards.org/cgi-bin/carddisp.pl?gene=PON2
MIR204	MicroRNA 204	RNA Gene		30	GC09M070809	13.131	https://www.genecards.org/cgi-bin/carddisp.pl?gene=MIR204
MIR27B	MicroRNA 27b	RNA Gene		28	GC09P100480	13.1218	https://www.genecards.org/cgi-bin/carddisp.pl?gene=MIR27B
MTTP	Microsomal Triglyceride Transfer Protein	Protein Coding	P55157	53	GC04P099563	13.0676	https://www.genecards.org/cgi-bin/carddisp.pl?gene=MTTP
GSTP1	Glutathione S-Transferase Pi 1	Protein Coding	P09211	59	GC11P067583	13.0647	https://www.genecards.org/cgi-bin/carddisp.pl?gene=GSTP1
ITLN1	Intelectin 1	Protein Coding	Q8WWA0	47	GC01M160876	13.0289	https://www.genecards.org/cgi-bin/carddisp.pl?gene=ITLN1
LINC02605	Long Intergenic Non-Protein Coding RNA 2605	RNA Gene		18	GC08P078838	13.0268	https://www.genecards.org/cgi-bin/carddisp.pl?gene=LINC02605
SLC12A3	Solute Carrier Family 12 Member 3	Protein Coding	P55017	56	GC16P056865	12.9368	https://www.genecards.org/cgi-bin/carddisp.pl?gene=SLC12A3
H6PD	Hexose-6-Phosphate Dehydrogenase/Glucose 1-Dehydrogenase	Protein Coding	O95479	53	GC01P009234	12.9077	https://www.genecards.org/cgi-bin/carddisp.pl?gene=H6PD
SERPINA1	Serpin Family A Member 1	Protein Coding	P01009	58	GC14M094376	12.8976	https://www.genecards.org/cgi-bin/carddisp.pl?gene=SERPINA1
SLC22A5	Solute Carrier Family 22 Member 5	Protein Coding	O76082	55	GC05P132369	12.8827	https://www.genecards.org/cgi-bin/carddisp.pl?gene=SLC22A5
FOXO1	Forkhead Box O1	Protein Coding	Q12778	60	GC13M040555	12.8775	https://www.genecards.org/cgi-bin/carddisp.pl?gene=FOXO1
CSF2	Colony Stimulating Factor 2	Protein Coding	P04141	54	GC05P132073	12.8702	https://www.genecards.org/cgi-bin/carddisp.pl?gene=CSF2
MAP2K1	Mitogen-Activated Protein Kinase Kinase 1	Protein Coding	Q02750	63	GC15P066386	12.8573	https://www.genecards.org/cgi-bin/carddisp.pl?gene=MAP2K1
MIR93	MicroRNA 93	RNA Gene		28	GC07M105252	12.8425	https://www.genecards.org/cgi-bin/carddisp.pl?gene=MIR93
SMAD3	SMAD Family Member 3	Protein Coding	P84022	61	GC15P067063	12.8292	https://www.genecards.org/cgi-bin/carddisp.pl?gene=SMAD3
SOD3	Superoxide Dismutase 3	Protein Coding	P08294	52	GC04P025034	12.8003	https://www.genecards.org/cgi-bin/carddisp.pl?gene=SOD3
GNAS-AS1	GNAS Antisense RNA 1	RNA Gene		29	GC20M058811	12.7883	https://www.genecards.org/cgi-bin/carddisp.pl?gene=GNAS-AS1
MIR222	MicroRNA 222	RNA Gene		27	GC0XM045747	12.7841	https://www.genecards.org/cgi-bin/carddisp.pl?gene=MIR222
MIR423	MicroRNA 423	RNA Gene		26	GC17P030117	12.766	https://www.genecards.org/cgi-bin/carddisp.pl?gene=MIR423
HMGB1	High Mobility Group Box 1	Protein Coding	P09429	57	GC13M030456	12.7559	https://www.genecards.org/cgi-bin/carddisp.pl?gene=HMGB1
MIR217	MicroRNA 217	RNA Gene		24	GC02M055982	12.7516	https://www.genecards.org/cgi-bin/carddisp.pl?gene=MIR217
IL15	Interleukin 15	Protein Coding	P40933	52	GC04P141636	12.7206	https://www.genecards.org/cgi-bin/carddisp.pl?gene=IL15
MLKL	Mixed Lineage Kinase Domain Like Pseudokinase	Protein Coding	Q8NB16	51	GC16M074829	12.696	https://www.genecards.org/cgi-bin/carddisp.pl?gene=MLKL
MET	MET Proto-Oncogene, Receptor Tyrosine Kinase	Protein Coding	P08581	63	GC07P116672	12.6809	https://www.genecards.org/cgi-bin/carddisp.pl?gene=MET
FABP4	Fatty Acid Binding Protein 4	Protein Coding	P15090	51	GC08M081478	12.6668	https://www.genecards.org/cgi-bin/carddisp.pl?gene=FABP4
SORD	Sorbitol Dehydrogenase	Protein Coding	Q00796	56	GC15P045023	12.6473	https://www.genecards.org/cgi-bin/carddisp.pl?gene=SORD
HJV	Hemojuvelin BMP Co-Receptor	Protein Coding	Q6ZVN8	52	GC01M160501	12.6457	https://www.genecards.org/cgi-bin/carddisp.pl?gene=HJV
CLEC16A	C-Type Lectin Domain Containing 16A	Protein Coding	Q2KHT3	46	GC16P010944	12.6307	https://www.genecards.org/cgi-bin/carddisp.pl?gene=CLEC16A
PSTPIP1	Proline-Serine-Threonine Phosphatase Interacting Protein 1	Protein Coding	O43586	53	GC15P076993	12.6262	https://www.genecards.org/cgi-bin/carddisp.pl?gene=PSTPIP1
FOXA2	Forkhead Box A2	Protein Coding	Q9Y261	55	GC20M022581	12.61	https://www.genecards.org/cgi-bin/carddisp.pl?gene=FOXA2
CD8A	CD8 Subunit Alpha	Protein Coding	P01732	56	GC02M086784	12.5953	https://www.genecards.org/cgi-bin/carddisp.pl?gene=CD8A
CCR1	C-C Motif Chemokine Receptor 1	Protein Coding	P32246	52	GC03M046218	12.5891	https://www.genecards.org/cgi-bin/carddisp.pl?gene=CCR1
BAX	BCL2 Associated X, Apoptosis Regulator	Protein Coding	Q07812	60	GC19P048954	12.5888	https://www.genecards.org/cgi-bin/carddisp.pl?gene=BAX
HSD11B1	Hydroxysteroid 11-Beta Dehydrogenase 1	Protein Coding	P28845	59	GC01P209686	12.5885	https://www.genecards.org/cgi-bin/carddisp.pl?gene=HSD11B1
CNR1	Cannabinoid Receptor 1	Protein Coding	P21554	55	GC06M088139	12.565	https://www.genecards.org/cgi-bin/carddisp.pl?gene=CNR1
CSF3	Colony Stimulating Factor 3	Protein Coding	P09919	50	GC17P040015	12.5631	https://www.genecards.org/cgi-bin/carddisp.pl?gene=CSF3
TPO	Thyroid Peroxidase	Protein Coding	P07202	56	GC02P001374	12.5628	https://www.genecards.org/cgi-bin/carddisp.pl?gene=TPO
MIR18A	MicroRNA 18a	RNA Gene		26	GC13P091683	12.5279	https://www.genecards.org/cgi-bin/carddisp.pl?gene=MIR18A
SGK1	Serum/Glucocorticoid Regulated Kinase 1	Protein Coding	O00141	58	GC06M134169	12.5132	https://www.genecards.org/cgi-bin/carddisp.pl?gene=SGK1
SLC17A5	Solute Carrier Family 17 Member 5	Protein Coding	Q9NRA2	54	GC06M073593	12.5118	https://www.genecards.org/cgi-bin/carddisp.pl?gene=SLC17A5
SMAD5-AS1	SMAD5 Antisense RNA 1	RNA Gene	Q9Y6J3	29	GC05M136129	12.4954	https://www.genecards.org/cgi-bin/carddisp.pl?gene=SMAD5-AS1
GSTT1	Glutathione S-Transferase Theta 1	Protein Coding	P30711	41	GC22Mi00270	12.4705	https://www.genecards.org/cgi-bin/carddisp.pl?gene=GSTT1
PCSK9	Proprotein Convertase Subtilisin/Kexin Type 9	Protein Coding	Q8NBP7	59	GC01P055039	12.4598	https://www.genecards.org/cgi-bin/carddisp.pl?gene=PCSK9
ADM	Adrenomedullin	Protein Coding	P35318	54	GC11P011175	12.4422	https://www.genecards.org/cgi-bin/carddisp.pl?gene=ADM
CD79A	CD79a Molecule	Protein Coding	P11912	56	GC19P041877	12.4293	https://www.genecards.org/cgi-bin/carddisp.pl?gene=CD79A
GSK3B	Glycogen Synthase Kinase 3 Beta	Protein Coding	P49841	59	GC03M119821	12.4159	https://www.genecards.org/cgi-bin/carddisp.pl?gene=GSK3B
MIR25	MicroRNA 25	RNA Gene		27	GC07M100093	12.4154	https://www.genecards.org/cgi-bin/carddisp.pl?gene=MIR25
IFNGR1	Interferon Gamma Receptor 1	Protein Coding	P15260	60	GC06M137197	12.4148	https://www.genecards.org/cgi-bin/carddisp.pl?gene=IFNGR1
CREBBP	CREB Binding Protein	Protein Coding	Q92793	62	GC16M020489	12.3636	https://www.genecards.org/cgi-bin/carddisp.pl?gene=CREBBP
CD274	CD274 Molecule	Protein Coding	Q9NZQ7	54	GC09P005450	12.3608	https://www.genecards.org/cgi-bin/carddisp.pl?gene=CD274
C3	Complement C3	Protein Coding	P01024	58	GC19M006677	12.3359	https://www.genecards.org/cgi-bin/carddisp.pl?gene=C3
PEPD	Peptidase D	Protein Coding	P12955	54	GC19M033386	12.3194	https://www.genecards.org/cgi-bin/carddisp.pl?gene=PEPD
SCN9A	Sodium Voltage-Gated Channel Alpha Subunit 9	Protein Coding	Q15858	56	GC02M166195	12.3123	https://www.genecards.org/cgi-bin/carddisp.pl?gene=SCN9A
ALDH2	Aldehyde Dehydrogenase 2 Family Member	Protein Coding	P05091	59	GC12P111766	12.3103	https://www.genecards.org/cgi-bin/carddisp.pl?gene=ALDH2
CDKN1C	Cyclin Dependent Kinase Inhibitor 1C	Protein Coding	P49918	53	GC11M011929	12.2899	https://www.genecards.org/cgi-bin/carddisp.pl?gene=CDKN1C
XIST	X Inactive Specific Transcript	RNA Gene		31	GC0XM073820	12.288	https://www.genecards.org/cgi-bin/carddisp.pl?gene=XIST
ANGPTL4	Angiopoietin Like 4	Protein Coding	Q9BY76	53	GC19P008363	12.243	https://www.genecards.org/cgi-bin/carddisp.pl?gene=ANGPTL4
CDH1	Cadherin 1	Protein Coding	P12830	58	GC16P068737	12.2147	https://www.genecards.org/cgi-bin/carddisp.pl?gene=CDH1
NTRK1	Neurotrophic Receptor Tyrosine Kinase 1	Protein Coding	P04629	58	GC01P156815	12.2101	https://www.genecards.org/cgi-bin/carddisp.pl?gene=NTRK1
PRKAA1	Protein Kinase AMP-Activated Catalytic Subunit Alpha 1	Protein Coding	Q13131	55	GC05M040759	12.2055	https://www.genecards.org/cgi-bin/carddisp.pl?gene=PRKAA1
MIR377	MicroRNA 377	RNA Gene		26	GC14P116756	12.1837	https://www.genecards.org/cgi-bin/carddisp.pl?gene=MIR377
PYY	Peptide YY	Protein Coding	P10082	50	GC17M043952	12.1762	https://www.genecards.org/cgi-bin/carddisp.pl?gene=PYY
KCNJ5	Potassium Inwardly Rectifying Channel Subfamily J Member 5	Protein Coding	P48544	56	GC11P128891	12.1575	https://www.genecards.org/cgi-bin/carddisp.pl?gene=KCNJ5
KDR	Kinase Insert Domain Receptor	Protein Coding	P35968	62	GC04M055078	12.1544	https://www.genecards.org/cgi-bin/carddisp.pl?gene=KDR
MIR130A	MicroRNA 130a	RNA Gene		29	GC11P057641	12.1479	https://www.genecards.org/cgi-bin/carddisp.pl?gene=MIR130A
PTPRC	Protein Tyrosine Phosphatase Receptor Type C	Protein Coding	P08575	61	GC01P198607	12.1184	https://www.genecards.org/cgi-bin/carddisp.pl?gene=PTPRC
PNPLA3	Patatin Like Phospholipase Domain Containing 3	Protein Coding	Q9NST1	51	GC22P043923	12.1043	https://www.genecards.org/cgi-bin/carddisp.pl?gene=PNPLA3
IL21	Interleukin 21	Protein Coding	Q9HBE4	53	GC04M122612	12.0948	https://www.genecards.org/cgi-bin/carddisp.pl?gene=IL21
MLH1	MutL Homolog 1	Protein Coding	P40692	58	GC03P036993	12.0839	https://www.genecards.org/cgi-bin/carddisp.pl?gene=MLH1
ELN	Elastin	Protein Coding	P15502	52	GC07P074027	12.0498	https://www.genecards.org/cgi-bin/carddisp.pl?gene=ELN
CASC15	Cancer Susceptibility 15	RNA Gene		24	GC06P021684	12.0297	https://www.genecards.org/cgi-bin/carddisp.pl?gene=CASC15
GIPR	Gastric Inhibitory Polypeptide Receptor	Protein Coding	P48546	52	GC19P045668	12.0294	https://www.genecards.org/cgi-bin/carddisp.pl?gene=GIPR
GPX1	Glutathione Peroxidase 1	Protein Coding	P07203	51	GC03M053731	12.0191	https://www.genecards.org/cgi-bin/carddisp.pl?gene=GPX1
AR	Androgen Receptor	Protein Coding	P10275	60	GC0XP067544	12.0189	https://www.genecards.org/cgi-bin/carddisp.pl?gene=AR
TCF4	Transcription Factor 4	Protein Coding	P15884	56	GC18M055222	11.9815	https://www.genecards.org/cgi-bin/carddisp.pl?gene=TCF4
TXNIP	Thioredoxin Interacting Protein	Protein Coding	Q9H3M7	47	GC01M145992	11.9492	https://www.genecards.org/cgi-bin/carddisp.pl?gene=TXNIP
GATA3	GATA Binding Protein 3	Protein Coding	P23771	58	GC10P008045	11.9343	https://www.genecards.org/cgi-bin/carddisp.pl?gene=GATA3
CDKN1A	Cyclin Dependent Kinase Inhibitor 1A	Protein Coding	P38936	58	GC06P134985	11.9088	https://www.genecards.org/cgi-bin/carddisp.pl?gene=CDKN1A
PTH	Parathyroid Hormone	Protein Coding	P01270	54	GC11M013492	11.9068	https://www.genecards.org/cgi-bin/carddisp.pl?gene=PTH
GAPDH	Glyceraldehyde-3-Phosphate Dehydrogenase	Protein Coding	P04406	59	GC12P038965	11.9067	https://www.genecards.org/cgi-bin/carddisp.pl?gene=GAPDH
ITGB2	Integrin Subunit Beta 2	Protein Coding	P05107	59	GC21M044885	11.874	https://www.genecards.org/cgi-bin/carddisp.pl?gene=ITGB2
CASP1	Caspase 1	Protein Coding	P29466	58	GC11M105025	11.8735	https://www.genecards.org/cgi-bin/carddisp.pl?gene=CASP1
COG2	Component Of Oligomeric Golgi Complex 2	Protein Coding	Q14746	48	GC01P230642	11.8681	https://www.genecards.org/cgi-bin/carddisp.pl?gene=COG2
TFR2	Transferrin Receptor 2	Protein Coding	Q9UP52	53	GC07M100620	11.8645	https://www.genecards.org/cgi-bin/carddisp.pl?gene=TFR2
ATP4A	ATPase H+/K+ Transporting Subunit Alpha	Protein Coding	P20648	49	GC19M093513	11.8555	https://www.genecards.org/cgi-bin/carddisp.pl?gene=ATP4A
LGALS3	Galectin 3	Protein Coding	P17931	53	GC14P055124	11.8476	https://www.genecards.org/cgi-bin/carddisp.pl?gene=LGALS3
MIR125B1	MicroRNA 125b-1	RNA Gene		29	GC11M126625	11.8268	https://www.genecards.org/cgi-bin/carddisp.pl?gene=MIR125B1
MIR15B	MicroRNA 15b	RNA Gene		27	GC03P160404	11.8113	https://www.genecards.org/cgi-bin/carddisp.pl?gene=MIR15B
ANGPT2	Angiopoietin 2	Protein Coding	O15123	58	GC08M006499	11.7845	https://www.genecards.org/cgi-bin/carddisp.pl?gene=ANGPT2
CTRC	Chymotrypsin C	Protein Coding	Q99895	53	GC01P015438	11.7801	https://www.genecards.org/cgi-bin/carddisp.pl?gene=CTRC
CYP2E1	Cytochrome P450 Family 2 Subfamily E Member 1	Protein Coding	P05181	55	GC10P133520	11.7792	https://www.genecards.org/cgi-bin/carddisp.pl?gene=CYP2E1
SLC22A4	Solute Carrier Family 22 Member 4	Protein Coding	Q9H015	53	GC05P132294	11.7737	https://www.genecards.org/cgi-bin/carddisp.pl?gene=SLC22A4
PIK3CB	Phosphatidylinositol-4,5-Bisphosphate 3-Kinase Catalytic Subunit Beta	Protein Coding	P42338	56	GC03M138652	11.7572	https://www.genecards.org/cgi-bin/carddisp.pl?gene=PIK3CB
MIR378A	MicroRNA 378a	RNA Gene		29	GC05P149732	11.7528	https://www.genecards.org/cgi-bin/carddisp.pl?gene=MIR378A
MIR34C	MicroRNA 34c	RNA Gene		29	GC11P112480	11.7422	https://www.genecards.org/cgi-bin/carddisp.pl?gene=MIR34C
PPY	Pancreatic Polypeptide	Protein Coding	P01298	48	GC17M043940	11.7259	https://www.genecards.org/cgi-bin/carddisp.pl?gene=PPY
CD14	CD14 Molecule	Protein Coding	P08571	54	GC05M140631	11.7109	https://www.genecards.org/cgi-bin/carddisp.pl?gene=CD14
ADA	Adenosine Deaminase	Protein Coding	P00813	60	GC20M044620	11.7041	https://www.genecards.org/cgi-bin/carddisp.pl?gene=ADA
TH	Tyrosine Hydroxylase	Protein Coding	P07101	59	GC11M002163	11.655	https://www.genecards.org/cgi-bin/carddisp.pl?gene=TH
CREB1	CAMP Responsive Element Binding Protein 1	Protein Coding	P16220	59	GC02P207529	11.62	https://www.genecards.org/cgi-bin/carddisp.pl?gene=CREB1
SH2B3	SH2B Adaptor Protein 3	Protein Coding	Q9UQQ2	55	GC12P111405	11.6106	https://www.genecards.org/cgi-bin/carddisp.pl?gene=SH2B3
AGTR2	Angiotensin II Receptor Type 2	Protein Coding	P50052	52	GC0XP116170	11.5939	https://www.genecards.org/cgi-bin/carddisp.pl?gene=AGTR2
NCF1	Neutrophil Cytosolic Factor 1	Protein Coding	P14598	55	GC07P086277	11.5842	https://www.genecards.org/cgi-bin/carddisp.pl?gene=NCF1
PCK2	Phosphoenolpyruvate Carboxykinase 2, Mitochondrial	Protein Coding	Q16822	54	GC14P024094	11.5743	https://www.genecards.org/cgi-bin/carddisp.pl?gene=PCK2
IRGM	Immunity Related GTPase M	Protein Coding	A1A4Y4	44	GC05P150846	11.5635	https://www.genecards.org/cgi-bin/carddisp.pl?gene=IRGM
SLC9B1	Solute Carrier Family 9 Member B1	Protein Coding	Q4ZJI4	43	GC04M102885	11.5341	https://www.genecards.org/cgi-bin/carddisp.pl?gene=SLC9B1
PTPN11	Protein Tyrosine Phosphatase Non-Receptor Type 11	Protein Coding	Q06124	62	GC12P112418	11.5197	https://www.genecards.org/cgi-bin/carddisp.pl?gene=PTPN11
THADA	THADA Armadillo Repeat Containing	Protein Coding	Q6YHU6	45	GC02M043233	11.5183	https://www.genecards.org/cgi-bin/carddisp.pl?gene=THADA
CXCL1	C-X-C Motif Chemokine Ligand 1	Protein Coding	P09341	52	GC04P073869	11.475	https://www.genecards.org/cgi-bin/carddisp.pl?gene=CXCL1
ZMPSTE24	Zinc Metallopeptidase STE24	Protein Coding	O75844	48	GC01P040258	11.4711	https://www.genecards.org/cgi-bin/carddisp.pl?gene=ZMPSTE24
FN1	Fibronectin 1	Protein Coding	P02751	59	GC02M215360	11.4557	https://www.genecards.org/cgi-bin/carddisp.pl?gene=FN1
MIR182	MicroRNA 182	RNA Gene		28	GC07M129770	11.4383	https://www.genecards.org/cgi-bin/carddisp.pl?gene=MIR182
LINC-ROR	Long Intergenic Non-Protein Coding RNA, Regulator Of Reprogramming	RNA Gene		23	GC18M057054	11.4346	https://www.genecards.org/cgi-bin/carddisp.pl?gene=LINC-ROR
UMOD	Uromodulin	Protein Coding	P07911	51	GC16M021309	11.4244	https://www.genecards.org/cgi-bin/carddisp.pl?gene=UMOD
TKT	Transketolase	Protein Coding	P29401	55	GC03M053224	11.4165	https://www.genecards.org/cgi-bin/carddisp.pl?gene=TKT
APOA4	Apolipoprotein A4	Protein Coding	P06727	50	GC11M116820	11.4074	https://www.genecards.org/cgi-bin/carddisp.pl?gene=APOA4
MIR33A	MicroRNA 33a	RNA Gene		26	GC22P041900	11.4056	https://www.genecards.org/cgi-bin/carddisp.pl?gene=MIR33A
UTS2	Urotensin 2	Protein Coding	O95399	48	GC01M007843	11.404	https://www.genecards.org/cgi-bin/carddisp.pl?gene=UTS2
HLA-DRA	Major Histocompatibility Complex, Class II, DR Alpha	Protein Coding	P01903	53	GC06P032439	11.4026	https://www.genecards.org/cgi-bin/carddisp.pl?gene=HLA-DRA
ATF6	Activating Transcription Factor 6	Protein Coding	P18850	57	GC01P161766	11.4025	https://www.genecards.org/cgi-bin/carddisp.pl?gene=ATF6
LRP5	LDL Receptor Related Protein 5	Protein Coding	O75197	58	GC11P068298	11.4005	https://www.genecards.org/cgi-bin/carddisp.pl?gene=LRP5
ATL1	Atlastin GTPase 1	Protein Coding	Q8WXF7	50	GC14P050532	11.3965	https://www.genecards.org/cgi-bin/carddisp.pl?gene=ATL1
ISL1	ISL LIM Homeobox 1	Protein Coding	P61371	53	GC05P051383	11.3717	https://www.genecards.org/cgi-bin/carddisp.pl?gene=ISL1
WNK1	WNK Lysine Deficient Protein Kinase 1	Protein Coding	Q9H4A3	56	GC12P000763	11.3716	https://www.genecards.org/cgi-bin/carddisp.pl?gene=WNK1
AMBP	Alpha-1-Microglobulin/Bikunin Precursor	Protein Coding	P02760	52	GC09M114060	11.3631	https://www.genecards.org/cgi-bin/carddisp.pl?gene=AMBP
GRP	Gastrin Releasing Peptide	Protein Coding	P07492	50	GC18P059220	11.3304	https://www.genecards.org/cgi-bin/carddisp.pl?gene=GRP
PLTP	Phospholipid Transfer Protein	Protein Coding	P55058	53	GC20M045898	11.3109	https://www.genecards.org/cgi-bin/carddisp.pl?gene=PLTP
TNFSF15	TNF Superfamily Member 15	Protein Coding	O95150	52	GC09M114784	11.2969	https://www.genecards.org/cgi-bin/carddisp.pl?gene=TNFSF15
TP63	Tumor Protein P63	Protein Coding	Q9H3D4	55	GC03P189598	11.2965	https://www.genecards.org/cgi-bin/carddisp.pl?gene=TP63
JUN	Jun Proto-Oncogene, AP-1 Transcription Factor Subunit	Protein Coding	P05412	58	GC01M058780	11.2964	https://www.genecards.org/cgi-bin/carddisp.pl?gene=JUN
HSD11B2	Hydroxysteroid 11-Beta Dehydrogenase 2	Protein Coding	P80365	54	GC16P082836	11.2867	https://www.genecards.org/cgi-bin/carddisp.pl?gene=HSD11B2
APOH	Apolipoprotein H	Protein Coding	P02749	53	GC17M066212	11.2641	https://www.genecards.org/cgi-bin/carddisp.pl?gene=APOH
PTCH1	Patched 1	Protein Coding	Q13635	60	GC09M095442	11.2531	https://www.genecards.org/cgi-bin/carddisp.pl?gene=PTCH1
MIR23B	MicroRNA 23b	RNA Gene		27	GC09P095085	11.225	https://www.genecards.org/cgi-bin/carddisp.pl?gene=MIR23B
MGAM	Maltase-Glucoamylase	Protein Coding	O43451	52	GC07P159421	11.214	https://www.genecards.org/cgi-bin/carddisp.pl?gene=MGAM
PPARD	Peroxisome Proliferator Activated Receptor Delta	Protein Coding	Q03181	54	GC06P134964	11.2083	https://www.genecards.org/cgi-bin/carddisp.pl?gene=PPARD
NFKBIA	NFKB Inhibitor Alpha	Protein Coding	P25963	59	GC14M035401	11.1941	https://www.genecards.org/cgi-bin/carddisp.pl?gene=NFKBIA
MMP8	Matrix Metallopeptidase 8	Protein Coding	P22894	56	GC11M126172	11.1913	https://www.genecards.org/cgi-bin/carddisp.pl?gene=MMP8
MIR100	MicroRNA 100	RNA Gene		28	GC11M122152	11.1773	https://www.genecards.org/cgi-bin/carddisp.pl?gene=MIR100
BBS1	Bardet-Biedl Syndrome 1	Protein Coding	Q8NFJ9	48	GC11P089185	11.1701	https://www.genecards.org/cgi-bin/carddisp.pl?gene=BBS1
APLN	Apelin	Protein Coding	Q9ULZ1	45	GC0XM129645	11.1605	https://www.genecards.org/cgi-bin/carddisp.pl?gene=APLN
PSMB8	Proteasome 20S Subunit Beta 8	Protein Coding	P28062	59	GC06M032840	11.1557	https://www.genecards.org/cgi-bin/carddisp.pl?gene=PSMB8
GNB3	G Protein Subunit Beta 3	Protein Coding	P16520	55	GC12P006839	11.1488	https://www.genecards.org/cgi-bin/carddisp.pl?gene=GNB3
ACHE	Acetylcholinesterase (Yt Blood Group)	Protein Coding	P22303	56	GC07M100889	11.1269	https://www.genecards.org/cgi-bin/carddisp.pl?gene=ACHE
CSF1	Colony Stimulating Factor 1	Protein Coding	P09603	53	GC01P109911	11.124	https://www.genecards.org/cgi-bin/carddisp.pl?gene=CSF1
MIR9-1	MicroRNA 9-1	RNA Gene		27	GC01M156420	11.124	https://www.genecards.org/cgi-bin/carddisp.pl?gene=MIR9-1
KRT18	Keratin 18	Protein Coding	P05783	58	GC12P052948	11.1052	https://www.genecards.org/cgi-bin/carddisp.pl?gene=KRT18
FBN1	Fibrillin 1	Protein Coding	P35555	56	GC15M048408	11.0932	https://www.genecards.org/cgi-bin/carddisp.pl?gene=FBN1
MIR193A	MicroRNA 193a	RNA Gene		27	GC17P031559	11.0834	https://www.genecards.org/cgi-bin/carddisp.pl?gene=MIR193A
LCAT	Lecithin-Cholesterol Acyltransferase	Protein Coding	P04180	56	GC16M067939	11.0687	https://www.genecards.org/cgi-bin/carddisp.pl?gene=LCAT
CCKAR	Cholecystokinin A Receptor	Protein Coding	P32238	54	GC04M026483	11.052	https://www.genecards.org/cgi-bin/carddisp.pl?gene=CCKAR
CYP27B1	Cytochrome P450 Family 27 Subfamily B Member 1	Protein Coding	O15528	55	GC12M059355	11.0513	https://www.genecards.org/cgi-bin/carddisp.pl?gene=CYP27B1
SHH	Sonic Hedgehog Signaling Molecule	Protein Coding	Q15465	59	GC07M155799	11.0475	https://www.genecards.org/cgi-bin/carddisp.pl?gene=SHH
CDKN3	Cyclin Dependent Kinase Inhibitor 3	Protein Coding	Q16667	51	GC14P054398	11.035	https://www.genecards.org/cgi-bin/carddisp.pl?gene=CDKN3
POLD1	DNA Polymerase Delta 1, Catalytic Subunit	Protein Coding	P28340	54	GC19P113486	11.025	https://www.genecards.org/cgi-bin/carddisp.pl?gene=POLD1
FXN	Frataxin	Protein Coding	Q16595	55	GC09P069035	11.0183	https://www.genecards.org/cgi-bin/carddisp.pl?gene=FXN
ANXA5	Annexin A5	Protein Coding	P08758	56	GC04M121667	11.0122	https://www.genecards.org/cgi-bin/carddisp.pl?gene=ANXA5
IL37	Interleukin 37	Protein Coding	Q9NZH6	48	GC02P143683	10.9946	https://www.genecards.org/cgi-bin/carddisp.pl?gene=IL37
MIR106B	MicroRNA 106b	RNA Gene		29	GC07M105256	10.9535	https://www.genecards.org/cgi-bin/carddisp.pl?gene=MIR106B
GFPT1	Glutamine--Fructose-6-Phosphate Transaminase 1	Protein Coding	Q06210	55	GC02M069319	10.9502	https://www.genecards.org/cgi-bin/carddisp.pl?gene=GFPT1
MIR181A1	MicroRNA 181a-1	RNA Gene		26	GC01M198860	10.9389	https://www.genecards.org/cgi-bin/carddisp.pl?gene=MIR181A1
CYP19A1	Cytochrome P450 Family 19 Subfamily A Member 1	Protein Coding	P11511	56	GC15M051208	10.9384	https://www.genecards.org/cgi-bin/carddisp.pl?gene=CYP19A1
FGFR1	Fibroblast Growth Factor Receptor 1	Protein Coding	P11362	63	GC08M038400	10.9376	https://www.genecards.org/cgi-bin/carddisp.pl?gene=FGFR1
NR1H4	Nuclear Receptor Subfamily 1 Group H Member 4	Protein Coding	Q96RI1	56	GC12P100473	10.9215	https://www.genecards.org/cgi-bin/carddisp.pl?gene=NR1H4
FAM167A	Family With Sequence Similarity 167 Member A	Protein Coding	Q96KS9	45	GC08M011421	10.9108	https://www.genecards.org/cgi-bin/carddisp.pl?gene=FAM167A
MIRLET7A1	MicroRNA Let-7a-1	RNA Gene		29	GC09P094175	10.9032	https://www.genecards.org/cgi-bin/carddisp.pl?gene=MIRLET7A1
TNFSF11	TNF Superfamily Member 11	Protein Coding	O14788	58	GC13P042562	10.894	https://www.genecards.org/cgi-bin/carddisp.pl?gene=TNFSF11
MUC2	Mucin 2, Oligomeric Mucus/Gel-Forming	Protein Coding	Q02817	48	GC11P001074	10.8755	https://www.genecards.org/cgi-bin/carddisp.pl?gene=MUC2
BLM	BLM RecQ Like Helicase	Protein Coding	P54132	58	GC15P090717	10.8705	https://www.genecards.org/cgi-bin/carddisp.pl?gene=BLM
PLA2G2A	Phospholipase A2 Group IIA	Protein Coding	P14555	55	GC01M019975	10.854	https://www.genecards.org/cgi-bin/carddisp.pl?gene=PLA2G2A
APOA2	Apolipoprotein A2	Protein Coding	P02652	53	GC01M161222	10.8295	https://www.genecards.org/cgi-bin/carddisp.pl?gene=APOA2
MIR124-1HG	MIR124-1 Host Gene	RNA Gene		22	GC08M010459	10.8255	https://www.genecards.org/cgi-bin/carddisp.pl?gene=MIR124-1HG
FCGR3B	Fc Gamma Receptor IIIb	Protein Coding	O75015	52	GC01M161623	10.7949	https://www.genecards.org/cgi-bin/carddisp.pl?gene=FCGR3B
MIR127	MicroRNA 127	RNA Gene		28	GC14P115744	10.7855	https://www.genecards.org/cgi-bin/carddisp.pl?gene=MIR127
GC	GC Vitamin D Binding Protein	Protein Coding	P02774	53	GC04M071741	10.7506	https://www.genecards.org/cgi-bin/carddisp.pl?gene=GC
SERPINA12	Serpin Family A Member 12	Protein Coding	Q8IW75	48	GC14M094487	10.7386	https://www.genecards.org/cgi-bin/carddisp.pl?gene=SERPINA12
IL10RB	Interleukin 10 Receptor Subunit Beta	Protein Coding	Q08334	53	GC21P033266	10.7121	https://www.genecards.org/cgi-bin/carddisp.pl?gene=IL10RB
TEK	TEK Receptor Tyrosine Kinase	Protein Coding	Q02763	60	GC09P027109	10.7073	https://www.genecards.org/cgi-bin/carddisp.pl?gene=TEK
MIR10B	MicroRNA 10b	RNA Gene		29	GC02P176150	10.7004	https://www.genecards.org/cgi-bin/carddisp.pl?gene=MIR10B
FADS1	Fatty Acid Desaturase 1	Protein Coding	O60427	51	GC11M061799	10.6847	https://www.genecards.org/cgi-bin/carddisp.pl?gene=FADS1
MIR494	MicroRNA 494	RNA Gene		24	GC14P116771	10.6841	https://www.genecards.org/cgi-bin/carddisp.pl?gene=MIR494
SOX13	SRY-Box Transcription Factor 13	Protein Coding	Q9UN79	45	GC01P204074	10.6748	https://www.genecards.org/cgi-bin/carddisp.pl?gene=SOX13
PRKACA	Protein Kinase CAMP-Activated Catalytic Subunit Alpha	Protein Coding	P17612	61	GC19M092217	10.6738	https://www.genecards.org/cgi-bin/carddisp.pl?gene=PRKACA
FOXM1	Forkhead Box M1	Protein Coding	Q08050	52	GC12M002857	10.6593	https://www.genecards.org/cgi-bin/carddisp.pl?gene=FOXM1
CYP1A2	Cytochrome P450 Family 1 Subfamily A Member 2	Protein Coding	P05177	54	GC15P074748	10.6388	https://www.genecards.org/cgi-bin/carddisp.pl?gene=CYP1A2
ERBB2	Erb-B2 Receptor Tyrosine Kinase 2	Protein Coding	P04626	63	GC17P039687	10.6373	https://www.genecards.org/cgi-bin/carddisp.pl?gene=ERBB2
TG	Thyroglobulin	Protein Coding	P01266	53	GC08P132866	10.6369	https://www.genecards.org/cgi-bin/carddisp.pl?gene=TG
CD28	CD28 Molecule	Protein Coding	P10747	56	GC02P203706	10.6311	https://www.genecards.org/cgi-bin/carddisp.pl?gene=CD28
ERAP1	Endoplasmic Reticulum Aminopeptidase 1	Protein Coding	Q9NZ08	53	GC05M096760	10.621	https://www.genecards.org/cgi-bin/carddisp.pl?gene=ERAP1
RAC1	Rac Family Small GTPase 1	Protein Coding	P63000	58	GC07P011586	10.6195	https://www.genecards.org/cgi-bin/carddisp.pl?gene=RAC1
GAL	Galanin And GMAP Prepropeptide	Protein Coding	P22466	54	GC11P089308	10.6181	https://www.genecards.org/cgi-bin/carddisp.pl?gene=GAL
MIR98	MicroRNA 98	RNA Gene		26	GC0XM053782	10.6174	https://www.genecards.org/cgi-bin/carddisp.pl?gene=MIR98
USF1	Upstream Transcription Factor 1	Protein Coding	P22415	53	GC01M161039	10.6164	https://www.genecards.org/cgi-bin/carddisp.pl?gene=USF1
GYS1	Glycogen Synthase 1	Protein Coding	P13807	58	GC19M093064	10.6145	https://www.genecards.org/cgi-bin/carddisp.pl?gene=GYS1
SRC	SRC Proto-Oncogene, Non-Receptor Tyrosine Kinase	Protein Coding	P12931	60	GC20P037344	10.6022	https://www.genecards.org/cgi-bin/carddisp.pl?gene=SRC
TGFBI	Transforming Growth Factor Beta Induced	Protein Coding	Q15582	54	GC05P136027	10.5966	https://www.genecards.org/cgi-bin/carddisp.pl?gene=TGFBI
HOTAIR	HOX Transcript Antisense RNA	RNA Gene		31	GC12M053962	10.581	https://www.genecards.org/cgi-bin/carddisp.pl?gene=HOTAIR
CCND1	Cyclin D1	Protein Coding	P24385	62	GC11P069641	10.5773	https://www.genecards.org/cgi-bin/carddisp.pl?gene=CCND1
GDF15	Growth Differentiation Factor 15	Protein Coding	Q99988	52	GC19P112633	10.571	https://www.genecards.org/cgi-bin/carddisp.pl?gene=GDF15
MVK	Mevalonate Kinase	Protein Coding	Q03426	55	GC12P109573	10.5596	https://www.genecards.org/cgi-bin/carddisp.pl?gene=MVK
CCL3	C-C Motif Chemokine Ligand 3	Protein Coding	P10147	50	GC17M036088	10.557	https://www.genecards.org/cgi-bin/carddisp.pl?gene=CCL3
SI	Sucrase-Isomaltase	Protein Coding	P14410	54	GC03M164978	10.5169	https://www.genecards.org/cgi-bin/carddisp.pl?gene=SI
CDKN1B	Cyclin Dependent Kinase Inhibitor 1B	Protein Coding	P46527	57	GC12P039206	10.5146	https://www.genecards.org/cgi-bin/carddisp.pl?gene=CDKN1B
MT-CO1	Mitochondrially Encoded Cytochrome C Oxidase I	Protein Coding	P00395	41	GCMTP005906	10.5103	https://www.genecards.org/cgi-bin/carddisp.pl?gene=MT-CO1
TGIF1	TGFB Induced Factor Homeobox 1	Protein Coding	Q15583	55	GC18P003411	10.4995	https://www.genecards.org/cgi-bin/carddisp.pl?gene=TGIF1
ANGPT1	Angiopoietin 1	Protein Coding	Q15389	54	GC08M107246	10.4879	https://www.genecards.org/cgi-bin/carddisp.pl?gene=ANGPT1
MIR215	MicroRNA 215	RNA Gene		26	GC01M220117	10.4856	https://www.genecards.org/cgi-bin/carddisp.pl?gene=MIR215
MIR30B	MicroRNA 30b	RNA Gene		29	GC08M134800	10.4829	https://www.genecards.org/cgi-bin/carddisp.pl?gene=MIR30B
MIR451A	MicroRNA 451a	RNA Gene		25	GC17M028861	10.4808	https://www.genecards.org/cgi-bin/carddisp.pl?gene=MIR451A
BCO1	Beta-Carotene Oxygenase 1	Protein Coding	Q9HAY6	45	GC16P081238	10.4701	https://www.genecards.org/cgi-bin/carddisp.pl?gene=BCO1
MANF	Mesencephalic Astrocyte Derived Neurotrophic Factor	Protein Coding	P55145	48	GC03P051385	10.465	https://www.genecards.org/cgi-bin/carddisp.pl?gene=MANF
TIMP2	TIMP Metallopeptidase Inhibitor 2	Protein Coding	P16035	50	GC17M078852	10.4592	https://www.genecards.org/cgi-bin/carddisp.pl?gene=TIMP2
MIR342	MicroRNA 342	RNA Gene		27	GC14P100109	10.4308	https://www.genecards.org/cgi-bin/carddisp.pl?gene=MIR342
TYK2	Tyrosine Kinase 2	Protein Coding	P29597	61	GC19M010350	10.411	https://www.genecards.org/cgi-bin/carddisp.pl?gene=TYK2
IKBKB	Inhibitor Of Nuclear Factor Kappa B Kinase Subunit Beta	Protein Coding	O14920	62	GC08P042271	10.405	https://www.genecards.org/cgi-bin/carddisp.pl?gene=IKBKB
MIR183	MicroRNA 183	RNA Gene		26	GC07M129882	10.3957	https://www.genecards.org/cgi-bin/carddisp.pl?gene=MIR183
STX1A	Syntaxin 1A	Protein Coding	Q16623	56	GC07M074496	10.3857	https://www.genecards.org/cgi-bin/carddisp.pl?gene=STX1A
MIRLET7C	MicroRNA Let-7c	RNA Gene		29	GC21P018103	10.3843	https://www.genecards.org/cgi-bin/carddisp.pl?gene=MIRLET7C
ESR2	Estrogen Receptor 2	Protein Coding	Q92731	58	GC14M064084	10.3822	https://www.genecards.org/cgi-bin/carddisp.pl?gene=ESR2
HSPA5	Heat Shock Protein Family A (Hsp70) Member 5	Protein Coding	P11021	58	GC09M125234	10.3809	https://www.genecards.org/cgi-bin/carddisp.pl?gene=HSPA5
PRSS1	Serine Protease 1	Protein Coding	P07477	52	GC07P157883	10.3726	https://www.genecards.org/cgi-bin/carddisp.pl?gene=PRSS1
XBP1	X-Box Binding Protein 1	Protein Coding	P17861	55	GC22M028794	10.3586	https://www.genecards.org/cgi-bin/carddisp.pl?gene=XBP1
ENG	Endoglin	Protein Coding	P17813	56	GC09M127815	10.3552	https://www.genecards.org/cgi-bin/carddisp.pl?gene=ENG
GPX3	Glutathione Peroxidase 3	Protein Coding	P22352	50	GC05P152433	10.3461	https://www.genecards.org/cgi-bin/carddisp.pl?gene=GPX3
MIR10A	MicroRNA 10a	RNA Gene		27	GC17M048579	10.3379	https://www.genecards.org/cgi-bin/carddisp.pl?gene=MIR10A
KL	Klotho	Protein Coding	Q9UEF7	56	GC13P033016	10.3326	https://www.genecards.org/cgi-bin/carddisp.pl?gene=KL
MIR130B	MicroRNA 130b	RNA Gene		26	GC22P074773	10.3068	https://www.genecards.org/cgi-bin/carddisp.pl?gene=MIR130B
FGFR2	Fibroblast Growth Factor Receptor 2	Protein Coding	P21802	64	GC10M121478	10.2994	https://www.genecards.org/cgi-bin/carddisp.pl?gene=FGFR2
IDDM15	Insulin Dependent Diabetes Mellitus 15	Genetic Locus		5	GC06U990067	10.2893	https://www.genecards.org/cgi-bin/carddisp.pl?gene=IDDM15
RHO	Rhodopsin	Protein Coding	P08100	56	GC03P139009	10.2742	https://www.genecards.org/cgi-bin/carddisp.pl?gene=RHO
MIR203A	MicroRNA 203a	RNA Gene		27	GC14P115816	10.2605	https://www.genecards.org/cgi-bin/carddisp.pl?gene=MIR203A
PMM2	Phosphomannomutase 2	Protein Coding	O15305	55	GC16P008788	10.2536	https://www.genecards.org/cgi-bin/carddisp.pl?gene=PMM2
IL23A	Interleukin 23 Subunit Alpha	Protein Coding	Q9NPF7	48	GC12P060632	10.2534	https://www.genecards.org/cgi-bin/carddisp.pl?gene=IL23A
TREX1	Three Prime Repair Exonuclease 1	Protein Coding	Q9NSU2	51	GC03P057594	10.2516	https://www.genecards.org/cgi-bin/carddisp.pl?gene=TREX1
SLC5A1	Solute Carrier Family 5 Member 1	Protein Coding	P13866	55	GC22P032043	10.2507	https://www.genecards.org/cgi-bin/carddisp.pl?gene=SLC5A1
S100A9	S100 Calcium Binding Protein A9	Protein Coding	P06702	53	GC01P153357	10.2323	https://www.genecards.org/cgi-bin/carddisp.pl?gene=S100A9
TFF1	Trefoil Factor 1	Protein Coding	P04155	52	GC21M042362	10.2236	https://www.genecards.org/cgi-bin/carddisp.pl?gene=TFF1
LGR5	Leucine Rich Repeat Containing G Protein-Coupled Receptor 5	Protein Coding	O75473	52	GC12P071439	10.2176	https://www.genecards.org/cgi-bin/carddisp.pl?gene=LGR5
MIR144	MicroRNA 144	RNA Gene		25	GC17M076393	10.213	https://www.genecards.org/cgi-bin/carddisp.pl?gene=MIR144
MT-ND4	Mitochondrially Encoded NADH:Ubiquinone Oxidoreductase Core Subunit 4	Protein Coding	P03905	40	GCMTP010762	10.2119	https://www.genecards.org/cgi-bin/carddisp.pl?gene=MT-ND4
SPTLC1	Serine Palmitoyltransferase Long Chain Base Subunit 1	Protein Coding	O15269	54	GC09M109404	10.2079	https://www.genecards.org/cgi-bin/carddisp.pl?gene=SPTLC1
MIRLET7G	MicroRNA Let-7g	RNA Gene		26	GC03M052268	10.189	https://www.genecards.org/cgi-bin/carddisp.pl?gene=MIRLET7G
SMAD7	SMAD Family Member 7	Protein Coding	O15105	53	GC18M048919	10.1809	https://www.genecards.org/cgi-bin/carddisp.pl?gene=SMAD7
NAT2	N-Acetyltransferase 2	Protein Coding	P11245	51	GC08P018391	10.1748	https://www.genecards.org/cgi-bin/carddisp.pl?gene=NAT2
GLI2	GLI Family Zinc Finger 2	Protein Coding	P10070	58	GC02P120735	10.1301	https://www.genecards.org/cgi-bin/carddisp.pl?gene=GLI2
BRCA2	BRCA2 DNA Repair Associated	Protein Coding	P51587	56	GC13P032315	10.1287	https://www.genecards.org/cgi-bin/carddisp.pl?gene=BRCA2
PSMB9	Proteasome 20S Subunit Beta 9	Protein Coding	P28065	55	GC06P134855	10.1157	https://www.genecards.org/cgi-bin/carddisp.pl?gene=PSMB9
FGF23	Fibroblast Growth Factor 23	Protein Coding	Q9GZV9	55	GC12M004368	10.1152	https://www.genecards.org/cgi-bin/carddisp.pl?gene=FGF23
MIRLET7B	MicroRNA Let-7b	RNA Gene		27	GC22P070828	10.1108	https://www.genecards.org/cgi-bin/carddisp.pl?gene=MIRLET7B
SERPINF2	Serpin Family F Member 2	Protein Coding	P08697	54	GC17P001742	10.0715	https://www.genecards.org/cgi-bin/carddisp.pl?gene=SERPINF2
UCN	Urocortin	Protein Coding	P55089	46	GC02M027308	10.0704	https://www.genecards.org/cgi-bin/carddisp.pl?gene=UCN
THBS1	Thrombospondin 1	Protein Coding	P07996	54	GC15P039581	10.0704	https://www.genecards.org/cgi-bin/carddisp.pl?gene=THBS1
SLC40A1	Solute Carrier Family 40 Member 1	Protein Coding	Q9NP59	56	GC02M189560	10.0703	https://www.genecards.org/cgi-bin/carddisp.pl?gene=SLC40A1
FREM2	FRAS1 Related Extracellular Matrix 2	Protein Coding	Q5SZK8	46	GC13P038687	10.065	https://www.genecards.org/cgi-bin/carddisp.pl?gene=FREM2
PIK3CD	Phosphatidylinositol-4,5-Bisphosphate 3-Kinase Catalytic Subunit Delta	Protein Coding	O00329	61	GC01P039534	10.0551	https://www.genecards.org/cgi-bin/carddisp.pl?gene=PIK3CD
MIR338	MicroRNA 338	RNA Gene		25	GC17M083631	10.0332	https://www.genecards.org/cgi-bin/carddisp.pl?gene=MIR338
MIRLET7I	MicroRNA Let-7i	RNA Gene		28	GC12P062690	10.017	https://www.genecards.org/cgi-bin/carddisp.pl?gene=MIRLET7I
SLC2A3	Solute Carrier Family 2 Member 3	Protein Coding	P11169	56	GC12M007919	10.0095	https://www.genecards.org/cgi-bin/carddisp.pl?gene=SLC2A3
PRKCD	Protein Kinase C Delta	Protein Coding	Q05655	60	GC03P053156	10.0042	https://www.genecards.org/cgi-bin/carddisp.pl?gene=PRKCD
SHC1	SHC Adaptor Protein 1	Protein Coding	P29353	53	GC01M154962	10.0008	https://www.genecards.org/cgi-bin/carddisp.pl?gene=SHC1
LOC126805877	MED14-Independent Group 3 Enhancer GRCh37_chr1:156099693-156100892	Functional Element		10	GC01P164644	9.99216	https://www.genecards.org/cgi-bin/carddisp.pl?gene=LOC126805877
CYP21A2	Cytochrome P450 Family 21 Subfamily A Member 2	Protein Coding	P08686	52	GC06P134844	9.98575	https://www.genecards.org/cgi-bin/carddisp.pl?gene=CYP21A2
F8	Coagulation Factor VIII	Protein Coding	P00451	56	GC0XM154835	9.98507	https://www.genecards.org/cgi-bin/carddisp.pl?gene=F8
IL18R1	Interleukin 18 Receptor 1	Protein Coding	Q13478	52	GC02P102311	9.98069	https://www.genecards.org/cgi-bin/carddisp.pl?gene=IL18R1
CCR3	C-C Motif Chemokine Receptor 3	Protein Coding	P51677	54	GC03P057390	9.97323	https://www.genecards.org/cgi-bin/carddisp.pl?gene=CCR3
CARD9	Caspase Recruitment Domain Family Member 9	Protein Coding	Q9H257	54	GC09M136364	9.9686	https://www.genecards.org/cgi-bin/carddisp.pl?gene=CARD9
SMO	Smoothened, Frizzled Class Receptor	Protein Coding	Q99835	60	GC07P136199	9.94047	https://www.genecards.org/cgi-bin/carddisp.pl?gene=SMO
BBS2	Bardet-Biedl Syndrome 2	Protein Coding	Q9BXC9	50	GC16M056467	9.92709	https://www.genecards.org/cgi-bin/carddisp.pl?gene=BBS2
SLC22A2	Solute Carrier Family 22 Member 2	Protein Coding	O15244	52	GC06M160222	9.88279	https://www.genecards.org/cgi-bin/carddisp.pl?gene=SLC22A2
RPS6KB1	Ribosomal Protein S6 Kinase B1	Protein Coding	P23443	59	GC17P059893	9.8664	https://www.genecards.org/cgi-bin/carddisp.pl?gene=RPS6KB1
BCHE	Butyrylcholinesterase	Protein Coding	P06276	59	GC03M165772	9.85475	https://www.genecards.org/cgi-bin/carddisp.pl?gene=BCHE
PRKAB1	Protein Kinase AMP-Activated Non-Catalytic Subunit Beta 1	Protein Coding	Q9Y478	56	GC12P119667	9.84773	https://www.genecards.org/cgi-bin/carddisp.pl?gene=PRKAB1
CTSB	Cathepsin B	Protein Coding	P07858	60	GC08M011842	9.84763	https://www.genecards.org/cgi-bin/carddisp.pl?gene=CTSB
LNPEP	Leucyl And Cystinyl Aminopeptidase	Protein Coding	Q9UIQ6	54	GC05P096935	9.84075	https://www.genecards.org/cgi-bin/carddisp.pl?gene=LNPEP
IRAK1	Interleukin 1 Receptor Associated Kinase 1	Protein Coding	P51617	58	GC0XM154010	9.83452	https://www.genecards.org/cgi-bin/carddisp.pl?gene=IRAK1
ITGA2	Integrin Subunit Alpha 2	Protein Coding	P17301	55	GC05P052989	9.82843	https://www.genecards.org/cgi-bin/carddisp.pl?gene=ITGA2
TLR9	Toll Like Receptor 9	Protein Coding	Q9NR96	54	GC03M053878	9.82714	https://www.genecards.org/cgi-bin/carddisp.pl?gene=TLR9
MIR486-1	MicroRNA 486-1	RNA Gene		26	GC08M041660	9.82591	https://www.genecards.org/cgi-bin/carddisp.pl?gene=MIR486-1
RHOA	Ras Homolog Family Member A	Protein Coding	P61586	59	GC03M049359	9.806	https://www.genecards.org/cgi-bin/carddisp.pl?gene=RHOA
NUDT6	Nudix Hydrolase 6	Protein Coding	P53370	46	GC04M122888	9.80043	https://www.genecards.org/cgi-bin/carddisp.pl?gene=NUDT6
MIR409	MicroRNA 409	RNA Gene		26	GC14P116762	9.79629	https://www.genecards.org/cgi-bin/carddisp.pl?gene=MIR409
AQP7	Aquaporin 7	Protein Coding	O14520	51	GC09M033384	9.78352	https://www.genecards.org/cgi-bin/carddisp.pl?gene=AQP7
FGB	Fibrinogen Beta Chain	Protein Coding	P02675	55	GC04P154685	9.77853	https://www.genecards.org/cgi-bin/carddisp.pl?gene=FGB
PWAR1	Prader Willi/Angelman Region RNA 1	RNA Gene		22	GC15P025135	9.72727	https://www.genecards.org/cgi-bin/carddisp.pl?gene=PWAR1
CHI3L1	Chitinase 3 Like 1	Protein Coding	P36222	54	GC01M203148	9.72358	https://www.genecards.org/cgi-bin/carddisp.pl?gene=CHI3L1
PTX3	Pentraxin 3	Protein Coding	P26022	51	GC03P157436	9.70866	https://www.genecards.org/cgi-bin/carddisp.pl?gene=PTX3
TLR5	Toll Like Receptor 5	Protein Coding	O60602	55	GC01M223109	9.70114	https://www.genecards.org/cgi-bin/carddisp.pl?gene=TLR5
MIR296	MicroRNA 296	RNA Gene		25	GC20M058817	9.69592	https://www.genecards.org/cgi-bin/carddisp.pl?gene=MIR296
IL7R	Interleukin 7 Receptor	Protein Coding	P16871	55	GC05P035852	9.69486	https://www.genecards.org/cgi-bin/carddisp.pl?gene=IL7R
IGF2R	Insulin Like Growth Factor 2 Receptor	Protein Coding	P11717	56	GC06P159969	9.69179	https://www.genecards.org/cgi-bin/carddisp.pl?gene=IGF2R
PTPN3	Protein Tyrosine Phosphatase Non-Receptor Type 3	Protein Coding	P26045	51	GC09M109375	9.68109	https://www.genecards.org/cgi-bin/carddisp.pl?gene=PTPN3
MIR320A	MicroRNA 320a	RNA Gene		29	GC08M022306	9.65984	https://www.genecards.org/cgi-bin/carddisp.pl?gene=MIR320A
MIR224	MicroRNA 224	RNA Gene		24	GC0XM151958	9.65944	https://www.genecards.org/cgi-bin/carddisp.pl?gene=MIR224
FGFR3	Fibroblast Growth Factor Receptor 3	Protein Coding	P22607	63	GC04P003985	9.62816	https://www.genecards.org/cgi-bin/carddisp.pl?gene=FGFR3
FASN	Fatty Acid Synthase	Protein Coding	P49327	58	GC17M082078	9.62705	https://www.genecards.org/cgi-bin/carddisp.pl?gene=FASN
TNFRSF25	TNF Receptor Superfamily Member 25	Protein Coding	Q93038	51	GC01M006460	9.62403	https://www.genecards.org/cgi-bin/carddisp.pl?gene=TNFRSF25
MIR19B1	MicroRNA 19b-1	RNA Gene		24	GC13P091678	9.61889	https://www.genecards.org/cgi-bin/carddisp.pl?gene=MIR19B1
LRBA	LPS Responsive Beige-Like Anchor Protein	Protein Coding	P50851	49	GC04M150264	9.61672	https://www.genecards.org/cgi-bin/carddisp.pl?gene=LRBA
GJB2	Gap Junction Protein Beta 2	Protein Coding	P29033	54	GC13M020187	9.5989	https://www.genecards.org/cgi-bin/carddisp.pl?gene=GJB2
MYO9B	Myosin IXB	Protein Coding	Q13459	53	GC19P112605	9.5915	https://www.genecards.org/cgi-bin/carddisp.pl?gene=MYO9B
NR0B2	Nuclear Receptor Subfamily 0 Group B Member 2	Protein Coding	Q15466	49	GC01M031090	9.58568	https://www.genecards.org/cgi-bin/carddisp.pl?gene=NR0B2
GJA1	Gap Junction Protein Alpha 1	Protein Coding	P17302	59	GC06P136245	9.58153	https://www.genecards.org/cgi-bin/carddisp.pl?gene=GJA1
TFF2	Trefoil Factor 2	Protein Coding	Q03403	48	GC21M042346	9.53835	https://www.genecards.org/cgi-bin/carddisp.pl?gene=TFF2
TRB	T Cell Receptor Beta Locus	Protein Coding	P0DSE2	28	GC07P159548	9.53826	https://www.genecards.org/cgi-bin/carddisp.pl?gene=TRB
NOS1	Nitric Oxide Synthase 1	Protein Coding	P29475	58	GC12M117208	9.53702	https://www.genecards.org/cgi-bin/carddisp.pl?gene=NOS1
SLC30A10	Solute Carrier Family 30 Member 10	Protein Coding	Q6XR72	50	GC01M219685	9.53193	https://www.genecards.org/cgi-bin/carddisp.pl?gene=SLC30A10
PRKCA	Protein Kinase C Alpha	Protein Coding	P17252	59	GC17P066302	9.52585	https://www.genecards.org/cgi-bin/carddisp.pl?gene=PRKCA
CD44	CD44 Molecule (IN Blood Group)	Protein Coding	P16070	57	GC11P035139	9.52549	https://www.genecards.org/cgi-bin/carddisp.pl?gene=CD44
CD38	CD38 Molecule	Protein Coding	P28907	55	GC04P024672	9.51199	https://www.genecards.org/cgi-bin/carddisp.pl?gene=CD38
REG1A	Regenerating Family Member 1 Alpha	Protein Coding	P05451	49	GC02P079120	9.50894	https://www.genecards.org/cgi-bin/carddisp.pl?gene=REG1A
GPBAR1	G Protein-Coupled Bile Acid Receptor 1	Protein Coding	Q8TDU6	48	GC02P218259	9.49144	https://www.genecards.org/cgi-bin/carddisp.pl?gene=GPBAR1
SLC9A3	Solute Carrier Family 9 Member A3	Protein Coding	P48764	56	GC05M000472	9.48833	https://www.genecards.org/cgi-bin/carddisp.pl?gene=SLC9A3
SAG	S-Antigen Visual Arrestin	Protein Coding	P10523	54	GC02P233542	9.48273	https://www.genecards.org/cgi-bin/carddisp.pl?gene=SAG
CD163	CD163 Molecule	Protein Coding	Q86VB7	53	GC12M029352	9.47948	https://www.genecards.org/cgi-bin/carddisp.pl?gene=CD163
TPMT	Thiopurine S-Methyltransferase	Protein Coding	P51580	55	GC06M018128	9.46582	https://www.genecards.org/cgi-bin/carddisp.pl?gene=TPMT
TFRC	Transferrin Receptor	Protein Coding	P02786	59	GC03M196303	9.45001	https://www.genecards.org/cgi-bin/carddisp.pl?gene=TFRC
EDNRA	Endothelin Receptor Type A	Protein Coding	P25101	58	GC04P147480	9.44481	https://www.genecards.org/cgi-bin/carddisp.pl?gene=EDNRA
PCNA	Proliferating Cell Nuclear Antigen	Protein Coding	P12004	59	GC20M005114	9.43268	https://www.genecards.org/cgi-bin/carddisp.pl?gene=PCNA
PF4	Platelet Factor 4	Protein Coding	P02776	50	GC04M073980	9.41172	https://www.genecards.org/cgi-bin/carddisp.pl?gene=PF4
RETREG1	Reticulophagy Regulator 1	Protein Coding	Q9H6L5	47	GC05M016574	9.40211	https://www.genecards.org/cgi-bin/carddisp.pl?gene=RETREG1
MSH2	MutS Homolog 2	Protein Coding	P43246	57	GC02P047403	9.34995	https://www.genecards.org/cgi-bin/carddisp.pl?gene=MSH2
F7	Coagulation Factor VII	Protein Coding	P08709	56	GC13P113105	9.33886	https://www.genecards.org/cgi-bin/carddisp.pl?gene=F7
MIR205	MicroRNA 205	RNA Gene		26	GC01P209432	9.33738	https://www.genecards.org/cgi-bin/carddisp.pl?gene=MIR205
MIR16-1	MicroRNA 16-1	RNA Gene		26	GC13M050048	9.33645	https://www.genecards.org/cgi-bin/carddisp.pl?gene=MIR16-1
EXT2	Exostosin Glycosyltransferase 2	Protein Coding	Q93063	53	GC11P044095	9.33419	https://www.genecards.org/cgi-bin/carddisp.pl?gene=EXT2
MT-ND5	Mitochondrially Encoded NADH:Ubiquinone Oxidoreductase Core Subunit 5	Protein Coding	P03915	41	GCMTP012339	9.33401	https://www.genecards.org/cgi-bin/carddisp.pl?gene=MT-ND5
OXT	Oxytocin/Neurophysin I Prepropeptide	Protein Coding	P01178	47	GC20P008141	9.33041	https://www.genecards.org/cgi-bin/carddisp.pl?gene=OXT
VPS13B	Vacuolar Protein Sorting 13 Homolog B	Protein Coding	Q7Z7G8	50	GC08P099049	9.32778	https://www.genecards.org/cgi-bin/carddisp.pl?gene=VPS13B
IFNA1	Interferon Alpha 1	Protein Coding	P01562	48	GC09P021770	9.31191	https://www.genecards.org/cgi-bin/carddisp.pl?gene=IFNA1
PRKCQ	Protein Kinase C Theta	Protein Coding	Q04759	57	GC10M006940	9.30984	https://www.genecards.org/cgi-bin/carddisp.pl?gene=PRKCQ
ETS1	ETS Proto-Oncogene 1, Transcription Factor	Protein Coding	P14921	56	GC11M128458	9.30443	https://www.genecards.org/cgi-bin/carddisp.pl?gene=ETS1
NOD1	Nucleotide Binding Oligomerization Domain Containing 1	Protein Coding	Q9Y239	51	GC07M030424	9.29583	https://www.genecards.org/cgi-bin/carddisp.pl?gene=NOD1
KIF1A	Kinesin Family Member 1A	Protein Coding	Q12756	52	GC02M240713	9.29148	https://www.genecards.org/cgi-bin/carddisp.pl?gene=KIF1A
CASC2	Cancer Susceptibility 2	RNA Gene	Q8IU53	32	GC10P118053	9.26509	https://www.genecards.org/cgi-bin/carddisp.pl?gene=CASC2
ALOX5	Arachidonate 5-Lipoxygenase	Protein Coding	P09917	57	GC10P045374	9.26469	https://www.genecards.org/cgi-bin/carddisp.pl?gene=ALOX5
CLCNKB	Chloride Voltage-Gated Channel Kb	Protein Coding	P51801	51	GC01P040859	9.24581	https://www.genecards.org/cgi-bin/carddisp.pl?gene=CLCNKB
GOT1	Glutamic-Oxaloacetic Transaminase 1	Protein Coding	P17174	53	GC10M099396	9.24564	https://www.genecards.org/cgi-bin/carddisp.pl?gene=GOT1
TIMP3	TIMP Metallopeptidase Inhibitor 3	Protein Coding	P35625	52	GC22P070427	9.23342	https://www.genecards.org/cgi-bin/carddisp.pl?gene=TIMP3
CNTF	Ciliary Neurotrophic Factor	Protein Coding	P26441	51	GC11P058622	9.23128	https://www.genecards.org/cgi-bin/carddisp.pl?gene=CNTF
SCD	Stearoyl-CoA Desaturase	Protein Coding	O00767	59	GC10P100347	9.22405	https://www.genecards.org/cgi-bin/carddisp.pl?gene=SCD
VIP	Vasoactive Intestinal Peptide	Protein Coding	P01282	53	GC06P152750	9.22309	https://www.genecards.org/cgi-bin/carddisp.pl?gene=VIP
KLRC4	Killer Cell Lectin Like Receptor C4	Protein Coding	O43908	44	GC12M029497	9.22063	https://www.genecards.org/cgi-bin/carddisp.pl?gene=KLRC4
NQO1	NAD(P)H Quinone Dehydrogenase 1	Protein Coding	P15559	56	GC16M069706	9.22014	https://www.genecards.org/cgi-bin/carddisp.pl?gene=NQO1
CYCS	Cytochrome C, Somatic	Protein Coding	P99999	57	GC07M025118	9.20858	https://www.genecards.org/cgi-bin/carddisp.pl?gene=CYCS
MIR339	MicroRNA 339	RNA Gene		27	GC07M001022	9.2019	https://www.genecards.org/cgi-bin/carddisp.pl?gene=MIR339
TLR8	Toll Like Receptor 8	Protein Coding	Q9NR97	58	GC0XP012924	9.19414	https://www.genecards.org/cgi-bin/carddisp.pl?gene=TLR8
DNMT1	DNA Methyltransferase 1	Protein Coding	P26358	61	GC19M010133	9.19383	https://www.genecards.org/cgi-bin/carddisp.pl?gene=DNMT1
HSPA8	Heat Shock Protein Family A (Hsp70) Member 8	Protein Coding	P11142	58	GC11M123057	9.17227	https://www.genecards.org/cgi-bin/carddisp.pl?gene=HSPA8
G6PC3	Glucose-6-Phosphatase Catalytic Subunit 3	Protein Coding	Q9BUM1	50	GC17P044070	9.15056	https://www.genecards.org/cgi-bin/carddisp.pl?gene=G6PC3
HLA-DMA	Major Histocompatibility Complex, Class II, DM Alpha	Protein Coding	P28067	48	GC06M093855	9.14654	https://www.genecards.org/cgi-bin/carddisp.pl?gene=HLA-DMA
MMP14	Matrix Metallopeptidase 14	Protein Coding	P50281	59	GC14P045941	9.14541	https://www.genecards.org/cgi-bin/carddisp.pl?gene=MMP14
NTS	Neurotensin	Protein Coding	P30990	50	GC12P085876	9.1353	https://www.genecards.org/cgi-bin/carddisp.pl?gene=NTS
FABP1	Fatty Acid Binding Protein 1	Protein Coding	P07148	52	GC02M088122	9.12774	https://www.genecards.org/cgi-bin/carddisp.pl?gene=FABP1
MAPK3	Mitogen-Activated Protein Kinase 3	Protein Coding	P27361	58	GC16M044057	9.11483	https://www.genecards.org/cgi-bin/carddisp.pl?gene=MAPK3
ERN1	Endoplasmic Reticulum To Nucleus Signaling 1	Protein Coding	O75460	56	GC17M064039	9.05784	https://www.genecards.org/cgi-bin/carddisp.pl?gene=ERN1
HK2	Hexokinase 2	Protein Coding	P52789	55	GC02P074947	9.04037	https://www.genecards.org/cgi-bin/carddisp.pl?gene=HK2
HSP90AA1	Heat Shock Protein 90 Alpha Family Class A Member 1	Protein Coding	P07900	60	GC14M102080	9.03708	https://www.genecards.org/cgi-bin/carddisp.pl?gene=HSP90AA1
NR3C2	Nuclear Receptor Subfamily 3 Group C Member 2	Protein Coding	P08235	55	GC04M148078	8.9903	https://www.genecards.org/cgi-bin/carddisp.pl?gene=NR3C2
ACACA	Acetyl-CoA Carboxylase Alpha	Protein Coding	Q13085	58	GC17M037084	8.98916	https://www.genecards.org/cgi-bin/carddisp.pl?gene=ACACA
PDP1	Pyruvate Dehydrogenase Phosphatase Catalytic Subunit 1	Protein Coding	Q9P0J1	56	GC08P093857	8.98004	https://www.genecards.org/cgi-bin/carddisp.pl?gene=PDP1
MIRLET7E	MicroRNA Let-7e	RNA Gene		26	GC19P113551	8.97994	https://www.genecards.org/cgi-bin/carddisp.pl?gene=MIRLET7E
BRCA1	BRCA1 DNA Repair Associated	Protein Coding	P38398	59	GC17M043044	8.97817	https://www.genecards.org/cgi-bin/carddisp.pl?gene=BRCA1
DRD2	Dopamine Receptor D2	Protein Coding	P14416	58	GC11M113409	8.96964	https://www.genecards.org/cgi-bin/carddisp.pl?gene=DRD2
CRH	Corticotropin Releasing Hormone	Protein Coding	P06850	52	GC08M066176	8.94323	https://www.genecards.org/cgi-bin/carddisp.pl?gene=CRH
ADRA2A	Adrenoceptor Alpha 2A	Protein Coding	P08913	55	GC10P111077	8.93004	https://www.genecards.org/cgi-bin/carddisp.pl?gene=ADRA2A
S100A12	S100 Calcium Binding Protein A12	Protein Coding	P80511	47	GC01M153373	8.92646	https://www.genecards.org/cgi-bin/carddisp.pl?gene=S100A12
MIR181C	MicroRNA 181c	RNA Gene		27	GC19P112499	8.91658	https://www.genecards.org/cgi-bin/carddisp.pl?gene=MIR181C
TLR7	Toll Like Receptor 7	Protein Coding	Q9NYK1	57	GC0XP012867	8.9148	https://www.genecards.org/cgi-bin/carddisp.pl?gene=TLR7
CHEK2	Checkpoint Kinase 2	Protein Coding	O96017	63	GC22M028687	8.8971	https://www.genecards.org/cgi-bin/carddisp.pl?gene=CHEK2
DNASE1	Deoxyribonuclease 1	Protein Coding	P24855	53	GC16P003611	8.89077	https://www.genecards.org/cgi-bin/carddisp.pl?gene=DNASE1
HNF1A-AS1	HNF1A Antisense RNA 1	RNA Gene		26	GC12M123604	8.88193	https://www.genecards.org/cgi-bin/carddisp.pl?gene=HNF1A-AS1
TGFA	Transforming Growth Factor Alpha	Protein Coding	P01135	54	GC02M070447	8.87685	https://www.genecards.org/cgi-bin/carddisp.pl?gene=TGFA
F13A1	Coagulation Factor XIII A Chain	Protein Coding	P00488	56	GC06M006144	8.87543	https://www.genecards.org/cgi-bin/carddisp.pl?gene=F13A1
MIR193B	MicroRNA 193b	RNA Gene		28	GC16P080722	8.85746	https://www.genecards.org/cgi-bin/carddisp.pl?gene=MIR193B
MIR335	MicroRNA 335	RNA Gene		27	GC07P130496	8.84801	https://www.genecards.org/cgi-bin/carddisp.pl?gene=MIR335
GZMB	Granzyme B	Protein Coding	P10144	56	GC14M024630	8.84442	https://www.genecards.org/cgi-bin/carddisp.pl?gene=GZMB
NRF1	Nuclear Respiratory Factor 1	Protein Coding	Q16656	53	GC07P129611	8.83038	https://www.genecards.org/cgi-bin/carddisp.pl?gene=NRF1
NRAS	NRAS Proto-Oncogene, GTPase	Protein Coding	P01111	59	GC01M114704	8.82487	https://www.genecards.org/cgi-bin/carddisp.pl?gene=NRAS
MIR532	MicroRNA 532	RNA Gene		24	GC0XP057619	8.81773	https://www.genecards.org/cgi-bin/carddisp.pl?gene=MIR532
MIR324	MicroRNA 324	RNA Gene		28	GC17M007223	8.79365	https://www.genecards.org/cgi-bin/carddisp.pl?gene=MIR324
AHR	Aryl Hydrocarbon Receptor	Protein Coding	P35869	55	GC07P016916	8.78213	https://www.genecards.org/cgi-bin/carddisp.pl?gene=AHR
CSN1S1	Casein Alpha S1	Protein Coding	P47710	45	GC04P070027	8.75563	https://www.genecards.org/cgi-bin/carddisp.pl?gene=CSN1S1
PTGER4	Prostaglandin E Receptor 4	Protein Coding	P35408	54	GC05P040679	8.7551	https://www.genecards.org/cgi-bin/carddisp.pl?gene=PTGER4
ATRIP	ATR Interacting Protein	Protein Coding	Q8WXE1	51	GC03P057588	8.74524	https://www.genecards.org/cgi-bin/carddisp.pl?gene=ATRIP
REL	REL Proto-Oncogene, NF-KB Subunit	Protein Coding	Q04864	55	GC02P060881	8.74329	https://www.genecards.org/cgi-bin/carddisp.pl?gene=REL
GPX2	Glutathione Peroxidase 2	Protein Coding	P18283	50	GC14M064939	8.74154	https://www.genecards.org/cgi-bin/carddisp.pl?gene=GPX2
CDK4	Cyclin Dependent Kinase 4	Protein Coding	P11802	62	GC12M059354	8.72681	https://www.genecards.org/cgi-bin/carddisp.pl?gene=CDK4
CCL20	C-C Motif Chemokine Ligand 20	Protein Coding	P78556	51	GC02P227846	8.72501	https://www.genecards.org/cgi-bin/carddisp.pl?gene=CCL20
SDHB	Succinate Dehydrogenase Complex Iron Sulfur Subunit B	Protein Coding	P21912	57	GC01M019222	8.72206	https://www.genecards.org/cgi-bin/carddisp.pl?gene=SDHB
MIR345	MicroRNA 345	RNA Gene		26	GC14P100307	8.69396	https://www.genecards.org/cgi-bin/carddisp.pl?gene=MIR345
CD34	CD34 Molecule	Protein Coding	P28906	54	GC01M207880	8.68941	https://www.genecards.org/cgi-bin/carddisp.pl?gene=CD34
FGF8	Fibroblast Growth Factor 8	Protein Coding	P55075	57	GC10M101770	8.68346	https://www.genecards.org/cgi-bin/carddisp.pl?gene=FGF8
MIR675	MicroRNA 675	RNA Gene		25	GC11M011901	8.68143	https://www.genecards.org/cgi-bin/carddisp.pl?gene=MIR675
MIR199B	MicroRNA 199b	RNA Gene		27	GC09M128244	8.67701	https://www.genecards.org/cgi-bin/carddisp.pl?gene=MIR199B
HERC2	HECT And RLD Domain Containing E3 Ubiquitin Protein Ligase 2	Protein Coding	O95714	54	GC15M028111	8.67443	https://www.genecards.org/cgi-bin/carddisp.pl?gene=HERC2
S100B	S100 Calcium Binding Protein B	Protein Coding	P04271	53	GC21M053599	8.65917	https://www.genecards.org/cgi-bin/carddisp.pl?gene=S100B
TGFBR2	Transforming Growth Factor Beta Receptor 2	Protein Coding	P37173	61	GC03P030623	8.65739	https://www.genecards.org/cgi-bin/carddisp.pl?gene=TGFBR2
NOX4	NADPH Oxidase 4	Protein Coding	Q9NPH5	51	GC11M089324	8.65285	https://www.genecards.org/cgi-bin/carddisp.pl?gene=NOX4
CASP8	Caspase 8	Protein Coding	Q14790	61	GC02P201233	8.64748	https://www.genecards.org/cgi-bin/carddisp.pl?gene=CASP8
IL2RB	Interleukin 2 Receptor Subunit Beta	Protein Coding	P14784	59	GC22M077093	8.64254	https://www.genecards.org/cgi-bin/carddisp.pl?gene=IL2RB
FGF7	Fibroblast Growth Factor 7	Protein Coding	P21781	52	GC15P049423	8.63854	https://www.genecards.org/cgi-bin/carddisp.pl?gene=FGF7
POLG	DNA Polymerase Gamma, Catalytic Subunit	Protein Coding	P54098	56	GC15M148631	8.63406	https://www.genecards.org/cgi-bin/carddisp.pl?gene=POLG
MIR96	MicroRNA 96	RNA Gene		27	GC07M129774	8.62195	https://www.genecards.org/cgi-bin/carddisp.pl?gene=MIR96
MLNR	Motilin Receptor	Protein Coding	O43193	49	GC13P049220	8.6219	https://www.genecards.org/cgi-bin/carddisp.pl?gene=MLNR
MIR133B	MicroRNA 133b	RNA Gene		29	GC06P052148	8.59439	https://www.genecards.org/cgi-bin/carddisp.pl?gene=MIR133B
HLA-DPA1	Major Histocompatibility Complex, Class II, DP Alpha 1	Protein Coding	P20036	49	GC06M033064	8.59409	https://www.genecards.org/cgi-bin/carddisp.pl?gene=HLA-DPA1
MIR151A	MicroRNA 151a	RNA Gene		26	GC08M140928	8.58825	https://www.genecards.org/cgi-bin/carddisp.pl?gene=MIR151A
TRPV1	Transient Receptor Potential Cation Channel Subfamily V Member 1	Protein Coding	Q8NER1	56	GC17M003565	8.58036	https://www.genecards.org/cgi-bin/carddisp.pl?gene=TRPV1
SLC37A4	Solute Carrier Family 37 Member 4	Protein Coding	O43826	51	GC11M126542	8.57891	https://www.genecards.org/cgi-bin/carddisp.pl?gene=SLC37A4
COMT	Catechol-O-Methyltransferase	Protein Coding	P21964	60	GC22P019941	8.57592	https://www.genecards.org/cgi-bin/carddisp.pl?gene=COMT
CPT1A	Carnitine Palmitoyltransferase 1A	Protein Coding	P50416	57	GC11M068754	8.5658	https://www.genecards.org/cgi-bin/carddisp.pl?gene=CPT1A
MIR590	MicroRNA 590	RNA Gene		27	GC07P074191	8.5562	https://www.genecards.org/cgi-bin/carddisp.pl?gene=MIR590
MIR19A	MicroRNA 19a	RNA Gene		27	GC13P091677	8.55302	https://www.genecards.org/cgi-bin/carddisp.pl?gene=MIR19A
SPTLC2	Serine Palmitoyltransferase Long Chain Base Subunit 2	Protein Coding	O15270	55	GC14M077505	8.55207	https://www.genecards.org/cgi-bin/carddisp.pl?gene=SPTLC2
MIR455	MicroRNA 455	RNA Gene		27	GC09P114209	8.5479	https://www.genecards.org/cgi-bin/carddisp.pl?gene=MIR455
PIK3C2A	Phosphatidylinositol-4-Phosphate 3-Kinase Catalytic Subunit Type 2 Alpha	Protein Coding	O00443	55	GC11M017940	8.53659	https://www.genecards.org/cgi-bin/carddisp.pl?gene=PIK3C2A
MIR330	MicroRNA 330	RNA Gene		28	GC19M092938	8.53215	https://www.genecards.org/cgi-bin/carddisp.pl?gene=MIR330
PDGFRB	Platelet Derived Growth Factor Receptor Beta	Protein Coding	P09619	62	GC05M150113	8.52988	https://www.genecards.org/cgi-bin/carddisp.pl?gene=PDGFRB
CD59	CD59 Molecule (CD59 Blood Group)	Protein Coding	P13987	55	GC11M033717	8.49841	https://www.genecards.org/cgi-bin/carddisp.pl?gene=CD59
MIR106A	MicroRNA 106a	RNA Gene		26	GC0XM134463	8.49424	https://www.genecards.org/cgi-bin/carddisp.pl?gene=MIR106A
IGFBP7	Insulin Like Growth Factor Binding Protein 7	Protein Coding	Q16270	54	GC04M057030	8.4901	https://www.genecards.org/cgi-bin/carddisp.pl?gene=IGFBP7
SLC9A1	Solute Carrier Family 9 Member A1	Protein Coding	P19634	58	GC01M031098	8.4868	https://www.genecards.org/cgi-bin/carddisp.pl?gene=SLC9A1
INPPL1	Inositol Polyphosphate Phosphatase Like 1	Protein Coding	O15357	56	GC11P072223	8.48466	https://www.genecards.org/cgi-bin/carddisp.pl?gene=INPPL1
MIR212	MicroRNA 212	RNA Gene		27	GC17M002050	8.48244	https://www.genecards.org/cgi-bin/carddisp.pl?gene=MIR212
CLU	Clusterin	Protein Coding	P10909	56	GC08M027596	8.48152	https://www.genecards.org/cgi-bin/carddisp.pl?gene=CLU
FCGR3A	Fc Gamma Receptor IIIa	Protein Coding	P08637	55	GC01M161541	8.4598	https://www.genecards.org/cgi-bin/carddisp.pl?gene=FCGR3A
TGFB2	Transforming Growth Factor Beta 2	Protein Coding	P61812	60	GC01P218345	8.44887	https://www.genecards.org/cgi-bin/carddisp.pl?gene=TGFB2
IL1RAP	Interleukin 1 Receptor Accessory Protein	Protein Coding	Q9NPH3	54	GC03P190514	8.4455	https://www.genecards.org/cgi-bin/carddisp.pl?gene=IL1RAP
HDAC9	Histone Deacetylase 9	Protein Coding	Q9UKV0	58	GC07P018086	8.38309	https://www.genecards.org/cgi-bin/carddisp.pl?gene=HDAC9
MIR141	MicroRNA 141	RNA Gene		29	GC12P038996	8.36273	https://www.genecards.org/cgi-bin/carddisp.pl?gene=MIR141
FMNL2	Formin Like 2	Protein Coding	Q96PY5	46	GC02P152335	8.35897	https://www.genecards.org/cgi-bin/carddisp.pl?gene=FMNL2
MIR196A1	MicroRNA 196a-1	RNA Gene		29	GC17M048632	8.35634	https://www.genecards.org/cgi-bin/carddisp.pl?gene=MIR196A1
CYP17A1	Cytochrome P450 Family 17 Subfamily A Member 1	Protein Coding	P05093	58	GC10M102830	8.34843	https://www.genecards.org/cgi-bin/carddisp.pl?gene=CYP17A1
STAT6	Signal Transducer And Activator Of Transcription 6	Protein Coding	P42226	59	GC12M057095	8.34065	https://www.genecards.org/cgi-bin/carddisp.pl?gene=STAT6
CS	Citrate Synthase	Protein Coding	O75390	54	GC12M056271	8.33917	https://www.genecards.org/cgi-bin/carddisp.pl?gene=CS
APOM	Apolipoprotein M	Protein Coding	O95445	47	GC06P134827	8.33661	https://www.genecards.org/cgi-bin/carddisp.pl?gene=APOM
HLA-DMB	Major Histocompatibility Complex, Class II, DM Beta	Protein Coding	P28068	48	GC06M032934	8.32417	https://www.genecards.org/cgi-bin/carddisp.pl?gene=HLA-DMB
KRT7	Keratin 7	Protein Coding	P08729	51	GC12P052232	8.31331	https://www.genecards.org/cgi-bin/carddisp.pl?gene=KRT7
DEFB4A	Defensin Beta 4A	Protein Coding	O15263	44	GC08P009676	8.30094	https://www.genecards.org/cgi-bin/carddisp.pl?gene=DEFB4A
KIR2DL1	Killer Cell Immunoglobulin Like Receptor, Two Ig Domains And Long Cytoplasmic Tail 1	Protein Coding	P43626	44	GC19P113694	8.30055	https://www.genecards.org/cgi-bin/carddisp.pl?gene=KIR2DL1
ERBB3	Erb-B2 Receptor Tyrosine Kinase 3	Protein Coding	P21860	63	GC12P060597	8.29011	https://www.genecards.org/cgi-bin/carddisp.pl?gene=ERBB3
KIR3DL1	Killer Cell Immunoglobulin Like Receptor, Three Ig Domains And Long Cytoplasmic Tail 1	Protein Coding	P43629	48	GC19P113697	8.28935	https://www.genecards.org/cgi-bin/carddisp.pl?gene=KIR3DL1
HOTTIP	HOXA Distal Transcript Antisense RNA	RNA Gene		29	GC07P027198	8.28929	https://www.genecards.org/cgi-bin/carddisp.pl?gene=HOTTIP
NKX6-1	NK6 Homeobox 1	Protein Coding	P78426	48	GC04M084491	8.28747	https://www.genecards.org/cgi-bin/carddisp.pl?gene=NKX6-1
LGALS1	Galectin 1	Protein Coding	P09382	52	GC22P037675	8.27974	https://www.genecards.org/cgi-bin/carddisp.pl?gene=LGALS1
HLA-DRB5	Major Histocompatibility Complex, Class II, DR Beta 5	Protein Coding	Q30154	48	GC06M093829	8.2732	https://www.genecards.org/cgi-bin/carddisp.pl?gene=HLA-DRB5
MT-CYB	Mitochondrially Encoded Cytochrome B	Protein Coding	P00156	40	GCMTP014749	8.26411	https://www.genecards.org/cgi-bin/carddisp.pl?gene=MT-CYB
TRIB3	Tribbles Pseudokinase 3	Protein Coding	Q96RU7	50	GC20P000365	8.25379	https://www.genecards.org/cgi-bin/carddisp.pl?gene=TRIB3
MICB	MHC Class I Polypeptide-Related Sequence B	Protein Coding	Q29980	49	GC06P134815	8.24098	https://www.genecards.org/cgi-bin/carddisp.pl?gene=MICB
PLAU	Plasminogen Activator, Urokinase	Protein Coding	P00749	60	GC10P073909	8.23524	https://www.genecards.org/cgi-bin/carddisp.pl?gene=PLAU
GPT2	Glutamic--Pyruvic Transaminase 2	Protein Coding	Q8TD30	54	GC16P082088	8.22392	https://www.genecards.org/cgi-bin/carddisp.pl?gene=GPT2
FGF10	Fibroblast Growth Factor 10	Protein Coding	O15520	56	GC05M044874	8.2142	https://www.genecards.org/cgi-bin/carddisp.pl?gene=FGF10
PDE5A	Phosphodiesterase 5A	Protein Coding	O76074	54	GC04M119494	8.19641	https://www.genecards.org/cgi-bin/carddisp.pl?gene=PDE5A
BBS4	Bardet-Biedl Syndrome 4	Protein Coding	Q96RK4	50	GC15P072686	8.18821	https://www.genecards.org/cgi-bin/carddisp.pl?gene=BBS4
MB	Myoglobin	Protein Coding	P02144	54	GC22M035606	8.18232	https://www.genecards.org/cgi-bin/carddisp.pl?gene=MB
MMP7	Matrix Metallopeptidase 7	Protein Coding	P09237	56	GC11M126171	8.16816	https://www.genecards.org/cgi-bin/carddisp.pl?gene=MMP7
RIPK1	Receptor Interacting Serine/Threonine Kinase 1	Protein Coding	Q13546	59	GC06P006449	8.16163	https://www.genecards.org/cgi-bin/carddisp.pl?gene=RIPK1
KIT	KIT Proto-Oncogene, Receptor Tyrosine Kinase	Protein Coding	P10721	62	GC04P054657	8.16045	https://www.genecards.org/cgi-bin/carddisp.pl?gene=KIT
KCNJ1	Potassium Inwardly Rectifying Channel Subfamily J Member 1	Protein Coding	P48048	56	GC11M128741	8.15233	https://www.genecards.org/cgi-bin/carddisp.pl?gene=KCNJ1
MIR107	MicroRNA 107	RNA Gene		27	GC10M089604	8.13966	https://www.genecards.org/cgi-bin/carddisp.pl?gene=MIR107
MPV17	Mitochondrial Inner Membrane Protein MPV17	Protein Coding	P39210	50	GC02M027309	8.12899	https://www.genecards.org/cgi-bin/carddisp.pl?gene=MPV17
ATL3	Atlastin GTPase 3	Protein Coding	Q6DD88	47	GC11M063624	8.1243	https://www.genecards.org/cgi-bin/carddisp.pl?gene=ATL3
HTR2A	5-Hydroxytryptamine Receptor 2A	Protein Coding	P28223	56	GC13M046831	8.11765	https://www.genecards.org/cgi-bin/carddisp.pl?gene=HTR2A
HLA-DQA2	Major Histocompatibility Complex, Class II, DQ Alpha 2	Protein Coding	P01906	46	GC06P032741	8.11145	https://www.genecards.org/cgi-bin/carddisp.pl?gene=HLA-DQA2
ITGAL	Integrin Subunit Alpha L	Protein Coding	P20701	55	GC16P030472	8.10481	https://www.genecards.org/cgi-bin/carddisp.pl?gene=ITGAL
GPX7	Glutathione Peroxidase 7	Protein Coding	Q96SL4	51	GC01P052602	8.08089	https://www.genecards.org/cgi-bin/carddisp.pl?gene=GPX7
MIR24-2	MicroRNA 24-2	RNA Gene		26	GC19M092208	8.07928	https://www.genecards.org/cgi-bin/carddisp.pl?gene=MIR24-2
NLRP1	NLR Family Pyrin Domain Containing 1	Protein Coding	Q9C000	52	GC17M005499	8.07255	https://www.genecards.org/cgi-bin/carddisp.pl?gene=NLRP1
PRRC2A	Proline Rich Coiled-Coil 2A	Protein Coding	P48634	43	GC06P134822	8.06895	https://www.genecards.org/cgi-bin/carddisp.pl?gene=PRRC2A
PRDM12	PR/SET Domain 12	Protein Coding	Q9H4Q4	44	GC09P130664	8.06603	https://www.genecards.org/cgi-bin/carddisp.pl?gene=PRDM12
ALOX12	Arachidonate 12-Lipoxygenase, 12S Type	Protein Coding	P18054	53	GC17P111131	8.06083	https://www.genecards.org/cgi-bin/carddisp.pl?gene=ALOX12
PAX6	Paired Box 6	Protein Coding	P26367	57	GC11M031784	8.04961	https://www.genecards.org/cgi-bin/carddisp.pl?gene=PAX6
CISH	Cytokine Inducible SH2 Containing Protein	Protein Coding	Q9NSE2	53	GC03M053819	8.04502	https://www.genecards.org/cgi-bin/carddisp.pl?gene=CISH
SERPINA6	Serpin Family A Member 6	Protein Coding	P08185	54	GC14M119770	8.03837	https://www.genecards.org/cgi-bin/carddisp.pl?gene=SERPINA6
SULT1A3	Sulfotransferase Family 1A Member 3	Protein Coding	P0DMM9	45	GC16P030199	8.03836	https://www.genecards.org/cgi-bin/carddisp.pl?gene=SULT1A3
OPRM1	Opioid Receptor Mu 1	Protein Coding	P35372	57	GC06P154267	8.0352	https://www.genecards.org/cgi-bin/carddisp.pl?gene=OPRM1
ELP1	Elongator Acetyltransferase Complex Subunit 1	Protein Coding	O95163	52	GC09M109845	8.0328	https://www.genecards.org/cgi-bin/carddisp.pl?gene=ELP1
IL17F	Interleukin 17F	Protein Coding	Q96PD4	51	GC06M094117	8.02912	https://www.genecards.org/cgi-bin/carddisp.pl?gene=IL17F
TLR3	Toll Like Receptor 3	Protein Coding	O15455	60	GC04P186059	8.01095	https://www.genecards.org/cgi-bin/carddisp.pl?gene=TLR3
TBX21	T-Box Transcription Factor 21	Protein Coding	Q9UL17	54	GC17P047733	8.0081	https://www.genecards.org/cgi-bin/carddisp.pl?gene=TBX21
TTC7A	Tetratricopeptide Repeat Domain 7A	Protein Coding	Q9ULT0	47	GC02P046919	8.00712	https://www.genecards.org/cgi-bin/carddisp.pl?gene=TTC7A
MIR149	MicroRNA 149	RNA Gene		30	GC02P240456	8.00095	https://www.genecards.org/cgi-bin/carddisp.pl?gene=MIR149
MTHFD1	Methylenetetrahydrofolate Dehydrogenase, Cyclohydrolase And Formyltetrahydrofolate Synthetase 1	Protein Coding	P11586	55	GC14P064388	7.98778	https://www.genecards.org/cgi-bin/carddisp.pl?gene=MTHFD1
NR1I2	Nuclear Receptor Subfamily 1 Group I Member 2	Protein Coding	O75469	52	GC03P119780	7.97844	https://www.genecards.org/cgi-bin/carddisp.pl?gene=NR1I2
PROX1	Prospero Homeobox 1	Protein Coding	Q92786	50	GC01P213983	7.97461	https://www.genecards.org/cgi-bin/carddisp.pl?gene=PROX1
TFAP2B	Transcription Factor AP-2 Beta	Protein Coding	Q92481	54	GC06P135127	7.9737	https://www.genecards.org/cgi-bin/carddisp.pl?gene=TFAP2B
BMP4	Bone Morphogenetic Protein 4	Protein Coding	P12644	58	GC14M053949	7.96787	https://www.genecards.org/cgi-bin/carddisp.pl?gene=BMP4
CTSG	Cathepsin G	Protein Coding	P08311	53	GC14M024573	7.96613	https://www.genecards.org/cgi-bin/carddisp.pl?gene=CTSG
PBX1	PBX Homeobox 1	Protein Coding	P40424	57	GC01P165730	7.93887	https://www.genecards.org/cgi-bin/carddisp.pl?gene=PBX1
TET2	Tet Methylcytosine Dioxygenase 2	Protein Coding	Q6N021	54	GC04P105145	7.9317	https://www.genecards.org/cgi-bin/carddisp.pl?gene=TET2
ITGB1	Integrin Subunit Beta 1	Protein Coding	P05556	58	GC10M035774	7.91621	https://www.genecards.org/cgi-bin/carddisp.pl?gene=ITGB1
SEMA4D	Semaphorin 4D	Protein Coding	Q92854	53	GC09M089360	7.91431	https://www.genecards.org/cgi-bin/carddisp.pl?gene=SEMA4D
GUSB	Glucuronidase Beta	Protein Coding	P08236	56	GC07M065960	7.91249	https://www.genecards.org/cgi-bin/carddisp.pl?gene=GUSB
RET	Ret Proto-Oncogene	Protein Coding	P07949	63	GC10P044403	7.90506	https://www.genecards.org/cgi-bin/carddisp.pl?gene=RET
HLA-G	Major Histocompatibility Complex, Class I, G	Protein Coding	P17693	53	GC06P134763	7.89552	https://www.genecards.org/cgi-bin/carddisp.pl?gene=HLA-G
TAGAP	T Cell Activation RhoGTPase Activating Protein	Protein Coding	Q8N103	46	GC06M159034	7.88654	https://www.genecards.org/cgi-bin/carddisp.pl?gene=TAGAP
NGFR	Nerve Growth Factor Receptor	Protein Coding	P08138	56	GC17P049495	7.88342	https://www.genecards.org/cgi-bin/carddisp.pl?gene=NGFR
LRP6	LDL Receptor Related Protein 6	Protein Coding	O75581	56	GC12M029527	7.88219	https://www.genecards.org/cgi-bin/carddisp.pl?gene=LRP6
IL12A-AS1	IL12A Antisense RNA 1	RNA Gene		22	GC03M159913	7.86809	https://www.genecards.org/cgi-bin/carddisp.pl?gene=IL12A-AS1
MKKS	MKKS Centrosomal Shuttling Protein	Protein Coding	Q9NPJ1	49	GC20M010490	7.8662	https://www.genecards.org/cgi-bin/carddisp.pl?gene=MKKS
MT-CO2	Mitochondrially Encoded Cytochrome C Oxidase II	Protein Coding	P00403	42	GCMTP007587	7.85978	https://www.genecards.org/cgi-bin/carddisp.pl?gene=MT-CO2
NR1H3	Nuclear Receptor Subfamily 1 Group H Member 3	Protein Coding	Q13133	55	GC11P047248	7.85877	https://www.genecards.org/cgi-bin/carddisp.pl?gene=NR1H3
CDH23	Cadherin Related 23	Protein Coding	Q9H251	54	GC10P071396	7.83276	https://www.genecards.org/cgi-bin/carddisp.pl?gene=CDH23
PLA2G6	Phospholipase A2 Group VI	Protein Coding	O60733	55	GC22M078732	7.82579	https://www.genecards.org/cgi-bin/carddisp.pl?gene=PLA2G6
ITGA4	Integrin Subunit Alpha 4	Protein Coding	P13612	57	GC02P181467	7.81364	https://www.genecards.org/cgi-bin/carddisp.pl?gene=ITGA4
IL4R	Interleukin 4 Receptor	Protein Coding	P24394	55	GC16P081249	7.81334	https://www.genecards.org/cgi-bin/carddisp.pl?gene=IL4R
CD86	CD86 Molecule	Protein Coding	P42081	53	GC03P122055	7.81009	https://www.genecards.org/cgi-bin/carddisp.pl?gene=CD86
BAZ1B	Bromodomain Adjacent To Zinc Finger Domain 1B	Protein Coding	Q9UIG0	49	GC07M073440	7.79957	https://www.genecards.org/cgi-bin/carddisp.pl?gene=BAZ1B
MIR148B	MicroRNA 148b	RNA Gene		28	GC12P054337	7.79049	https://www.genecards.org/cgi-bin/carddisp.pl?gene=MIR148B
RBP3	Retinol Binding Protein 3	Protein Coding	P10745	52	GC10P047348	7.78809	https://www.genecards.org/cgi-bin/carddisp.pl?gene=RBP3
LPXN	Leupaxin	Protein Coding	O60711	49	GC11M125088	7.78543	https://www.genecards.org/cgi-bin/carddisp.pl?gene=LPXN
CCAT1	Colon Cancer Associated Transcript 1	RNA Gene		22	GC08M127207	7.78469	https://www.genecards.org/cgi-bin/carddisp.pl?gene=CCAT1
BBS12	Bardet-Biedl Syndrome 12	Protein Coding	Q6ZW61	44	GC04P122702	7.77616	https://www.genecards.org/cgi-bin/carddisp.pl?gene=BBS12
ATF6B	Activating Transcription Factor 6 Beta	Protein Coding	Q99941	46	GC06M032115	7.75763	https://www.genecards.org/cgi-bin/carddisp.pl?gene=ATF6B
PECAM1	Platelet And Endothelial Cell Adhesion Molecule 1	Protein Coding	P16284	50	GC17M064319	7.75607	https://www.genecards.org/cgi-bin/carddisp.pl?gene=PECAM1
MIR128-1	MicroRNA 128-1	RNA Gene		26	GC02P135665	7.7525	https://www.genecards.org/cgi-bin/carddisp.pl?gene=MIR128-1
ABCG2	ATP Binding Cassette Subfamily G Member 2 (JR Blood Group)	Protein Coding	Q9UNQ0	59	GC04M088090	7.75246	https://www.genecards.org/cgi-bin/carddisp.pl?gene=ABCG2
VTN	Vitronectin	Protein Coding	P04004	53	GC17M076385	7.74868	https://www.genecards.org/cgi-bin/carddisp.pl?gene=VTN
LMNB2	Lamin B2	Protein Coding	Q03252	51	GC19M091759	7.74776	https://www.genecards.org/cgi-bin/carddisp.pl?gene=LMNB2
MUC5AC	Mucin 5AC, Oligomeric Mucus/Gel-Forming	Protein Coding	P98088	48	GC11P010637	7.74752	https://www.genecards.org/cgi-bin/carddisp.pl?gene=MUC5AC
CYTOR	Cytoskeleton Regulator RNA	RNA Gene		29	GC02P089243	7.74553	https://www.genecards.org/cgi-bin/carddisp.pl?gene=CYTOR
HSPB1	Heat Shock Protein Family B (Small) Member 1	Protein Coding	P04792	60	GC07P076302	7.72077	https://www.genecards.org/cgi-bin/carddisp.pl?gene=HSPB1
SLC22A1	Solute Carrier Family 22 Member 1	Protein Coding	O15245	52	GC06P160121	7.71598	https://www.genecards.org/cgi-bin/carddisp.pl?gene=SLC22A1
CD80	CD80 Molecule	Protein Coding	P33681	52	GC03M119524	7.70936	https://www.genecards.org/cgi-bin/carddisp.pl?gene=CD80
NORAD	Non-Coding RNA Activated By DNA Damage	RNA Gene		25	GC20M036462	7.69565	https://www.genecards.org/cgi-bin/carddisp.pl?gene=NORAD
HSPA1A	Heat Shock Protein Family A (Hsp70) Member 1A	Protein Coding	P0DMV8	55	GC06P134838	7.69385	https://www.genecards.org/cgi-bin/carddisp.pl?gene=HSPA1A
FURIN	Furin, Paired Basic Amino Acid Cleaving Enzyme	Protein Coding	P09958	56	GC15P090868	7.68716	https://www.genecards.org/cgi-bin/carddisp.pl?gene=FURIN
NF1	Neurofibromin 1	Protein Coding	P21359	56	GC17P031094	7.68407	https://www.genecards.org/cgi-bin/carddisp.pl?gene=NF1
SNRPN	Small Nuclear Ribonucleoprotein Polypeptide N	Protein Coding	P63162	53	GC15P024823	7.67538	https://www.genecards.org/cgi-bin/carddisp.pl?gene=SNRPN
MAPK10	Mitogen-Activated Protein Kinase 10	Protein Coding	P53779	55	GC04M085990	7.67268	https://www.genecards.org/cgi-bin/carddisp.pl?gene=MAPK10
ARAP1	ArfGAP With RhoGAP Domain, Ankyrin Repeat And PH Domain 1	Protein Coding	Q96P48	47	GC11M125661	7.67229	https://www.genecards.org/cgi-bin/carddisp.pl?gene=ARAP1
MT-TP	Mitochondrially Encoded TRNA-Pro (CCN)	RNA Gene		15	GCMTM015957	7.65236	https://www.genecards.org/cgi-bin/carddisp.pl?gene=MT-TP
CYP1A1	Cytochrome P450 Family 1 Subfamily A Member 1	Protein Coding	P04798	56	GC15M074719	7.65198	https://www.genecards.org/cgi-bin/carddisp.pl?gene=CYP1A1
MT-ATP6	Mitochondrially Encoded ATP Synthase Membrane Subunit 6	Protein Coding	P00846	41	GCMTP008531	7.64989	https://www.genecards.org/cgi-bin/carddisp.pl?gene=MT-ATP6
SOAT1	Sterol O-Acyltransferase 1	Protein Coding	P35610	53	GC01P179294	7.64613	https://www.genecards.org/cgi-bin/carddisp.pl?gene=SOAT1
IFT172	Intraflagellar Transport 172	Protein Coding	Q9UG01	49	GC02M028880	7.63882	https://www.genecards.org/cgi-bin/carddisp.pl?gene=IFT172
PKLR	Pyruvate Kinase L/R	Protein Coding	P30613	55	GC01M155289	7.63527	https://www.genecards.org/cgi-bin/carddisp.pl?gene=PKLR
IFNA2	Interferon Alpha 2	Protein Coding	P01563	52	GC09M021384	7.63272	https://www.genecards.org/cgi-bin/carddisp.pl?gene=IFNA2
PMS2	PMS1 Homolog 2, Mismatch Repair System Component	Protein Coding	P54278	58	GC07M005973	7.63086	https://www.genecards.org/cgi-bin/carddisp.pl?gene=PMS2
MAPT	Microtubule Associated Protein Tau	Protein Coding	P10636	59	GC17P045894	7.62962	https://www.genecards.org/cgi-bin/carddisp.pl?gene=MAPT
TERC	Telomerase RNA Component	RNA Gene		35	GC03M169765	7.60841	https://www.genecards.org/cgi-bin/carddisp.pl?gene=TERC
TFAP2A	Transcription Factor AP-2 Alpha	Protein Coding	P05549	55	GC06M010393	7.60606	https://www.genecards.org/cgi-bin/carddisp.pl?gene=TFAP2A
ATP12A	ATPase H+/K+ Transporting Non-Gastric Alpha2 Subunit	Protein Coding	P54707	51	GC13P024680	7.60302	https://www.genecards.org/cgi-bin/carddisp.pl?gene=ATP12A
SLC19A1	Solute Carrier Family 19 Member 1	Protein Coding	P41440	55	GC21M045493	7.5884	https://www.genecards.org/cgi-bin/carddisp.pl?gene=SLC19A1
NTF3	Neurotrophin 3	Protein Coding	P20783	53	GC12P038933	7.58526	https://www.genecards.org/cgi-bin/carddisp.pl?gene=NTF3
MIR26A1	MicroRNA 26a-1	RNA Gene		28	GC03P037969	7.5749	https://www.genecards.org/cgi-bin/carddisp.pl?gene=MIR26A1
SOX2	SRY-Box Transcription Factor 2	Protein Coding	P48431	55	GC03P181711	7.57469	https://www.genecards.org/cgi-bin/carddisp.pl?gene=SOX2
GTF2I	General Transcription Factor IIi	Protein Coding	P78347	48	GC07P086270	7.57076	https://www.genecards.org/cgi-bin/carddisp.pl?gene=GTF2I
MSH6	MutS Homolog 6	Protein Coding	P52701	58	GC02P047695	7.56089	https://www.genecards.org/cgi-bin/carddisp.pl?gene=MSH6
F2RL1	F2R Like Trypsin Receptor 1	Protein Coding	P55085	53	GC05P076818	7.55951	https://www.genecards.org/cgi-bin/carddisp.pl?gene=F2RL1
NOTCH3	Notch Receptor 3	Protein Coding	Q9UM47	60	GC19M015159	7.55948	https://www.genecards.org/cgi-bin/carddisp.pl?gene=NOTCH3
SREBF2	Sterol Regulatory Element Binding Transcription Factor 2	Protein Coding	Q12772	52	GC22P041833	7.55281	https://www.genecards.org/cgi-bin/carddisp.pl?gene=SREBF2
CX3CR1	C-X3-C Motif Chemokine Receptor 1	Protein Coding	P49238	53	GC03M039279	7.52884	https://www.genecards.org/cgi-bin/carddisp.pl?gene=CX3CR1
DST	Dystonin	Protein Coding	Q03001	51	GC06M056457	7.51835	https://www.genecards.org/cgi-bin/carddisp.pl?gene=DST
CLPS	Colipase	Protein Coding	P04118	47	GC06M093929	7.49592	https://www.genecards.org/cgi-bin/carddisp.pl?gene=CLPS
UBA2	Ubiquitin Like Modifier Activating Enzyme 2	Protein Coding	Q9UBT2	51	GC19P034428	7.48275	https://www.genecards.org/cgi-bin/carddisp.pl?gene=UBA2
PSCA	Prostate Stem Cell Antigen	Protein Coding	O43653	48	GC08P142670	7.48117	https://www.genecards.org/cgi-bin/carddisp.pl?gene=PSCA
XRCC1	X-Ray Repair Cross Complementing 1	Protein Coding	P18887	54	GC19M043543	7.47303	https://www.genecards.org/cgi-bin/carddisp.pl?gene=XRCC1
NOTCH1	Notch Receptor 1	Protein Coding	P46531	61	GC09M138715	7.46228	https://www.genecards.org/cgi-bin/carddisp.pl?gene=NOTCH1
KEAP1	Kelch Like ECH Associated Protein 1	Protein Coding	Q14145	56	GC19M010486	7.46163	https://www.genecards.org/cgi-bin/carddisp.pl?gene=KEAP1
EMSLR	E2F1 MRNA Stabilizing LncRNA	RNA Gene		19	GC07P106459	7.44907	https://www.genecards.org/cgi-bin/carddisp.pl?gene=EMSLR
COL1A1	Collagen Type I Alpha 1 Chain	Protein Coding	P02452	58	GC17M078201	7.44186	https://www.genecards.org/cgi-bin/carddisp.pl?gene=COL1A1
GBA1	Glucosylceramidase Beta 1	Protein Coding	P04062	58	GC01M161111	7.43644	https://www.genecards.org/cgi-bin/carddisp.pl?gene=GBA1
SAMHD1	SAM And HD Domain Containing Deoxynucleoside Triphosphate Triphosphohydrolase 1	Protein Coding	Q9Y3Z3	52	GC20M036890	7.43553	https://www.genecards.org/cgi-bin/carddisp.pl?gene=SAMHD1
TXN	Thioredoxin	Protein Coding	P10599	55	GC09M110243	7.42715	https://www.genecards.org/cgi-bin/carddisp.pl?gene=TXN
MECP2	Methyl-CpG Binding Protein 2	Protein Coding	P51608	55	GC0XM154021	7.42653	https://www.genecards.org/cgi-bin/carddisp.pl?gene=MECP2
PLEK	Pleckstrin	Protein Coding	P08567	49	GC02P068365	7.41961	https://www.genecards.org/cgi-bin/carddisp.pl?gene=PLEK
CCT5	Chaperonin Containing TCP1 Subunit 5	Protein Coding	P48643	52	GC05P010249	7.41554	https://www.genecards.org/cgi-bin/carddisp.pl?gene=CCT5
MYD88	MYD88 Innate Immune Signal Transduction Adaptor	Protein Coding	Q99836	57	GC03P038290	7.40518	https://www.genecards.org/cgi-bin/carddisp.pl?gene=MYD88
HSPA1B	Heat Shock Protein Family A (Hsp70) Member 1B	Protein Coding	P0DMV9	46	GC06P134837	7.40297	https://www.genecards.org/cgi-bin/carddisp.pl?gene=HSPA1B
FANCC	FA Complementation Group C	Protein Coding	Q00597	56	GC09M095099	7.39553	https://www.genecards.org/cgi-bin/carddisp.pl?gene=FANCC
BACH2	BTB Domain And CNC Homolog 2	Protein Coding	Q9BYV9	51	GC06M089926	7.39527	https://www.genecards.org/cgi-bin/carddisp.pl?gene=BACH2
PTGDS	Prostaglandin D2 Synthase	Protein Coding	P41222	54	GC09P141923	7.39077	https://www.genecards.org/cgi-bin/carddisp.pl?gene=PTGDS
CCR2	C-C Motif Chemokine Receptor 2	Protein Coding	P41597	53	GC03P057394	7.38137	https://www.genecards.org/cgi-bin/carddisp.pl?gene=CCR2
GFAP	Glial Fibrillary Acidic Protein	Protein Coding	P14136	57	GC17M077883	7.37511	https://www.genecards.org/cgi-bin/carddisp.pl?gene=GFAP
FUT2	Fucosyltransferase 2 (H Blood Group)	Protein Coding	Q10981	54	GC19P048695	7.35873	https://www.genecards.org/cgi-bin/carddisp.pl?gene=FUT2
TBL2	Transducin Beta Like 2	Protein Coding	Q9Y4P3	46	GC07M074495	7.35187	https://www.genecards.org/cgi-bin/carddisp.pl?gene=TBL2
JAK1	Janus Kinase 1	Protein Coding	P23458	62	GC01M064833	7.34095	https://www.genecards.org/cgi-bin/carddisp.pl?gene=JAK1
IL33	Interleukin 33	Protein Coding	O95760	48	GC09P009214	7.32772	https://www.genecards.org/cgi-bin/carddisp.pl?gene=IL33
BIRC5	Baculoviral IAP Repeat Containing 5	Protein Coding	O15392	55	GC17P078214	7.32312	https://www.genecards.org/cgi-bin/carddisp.pl?gene=BIRC5
SORBS1	Sorbin And SH3 Domain Containing 1	Protein Coding	Q9BX66	48	GC10M095311	7.31783	https://www.genecards.org/cgi-bin/carddisp.pl?gene=SORBS1
MIR133A1	MicroRNA 133a-1	RNA Gene		23	GC18M034039	7.30023	https://www.genecards.org/cgi-bin/carddisp.pl?gene=MIR133A1
P2RY12	Purinergic Receptor P2Y12	Protein Coding	Q9H244	56	GC03M151336	7.29064	https://www.genecards.org/cgi-bin/carddisp.pl?gene=P2RY12
SNORD15A	Small Nucleolar RNA, C/D Box 15A	RNA Gene		23	GC11P075400	7.28809	https://www.genecards.org/cgi-bin/carddisp.pl?gene=SNORD15A
TNFSF10	TNF Superfamily Member 10	Protein Coding	P50591	53	GC03M172505	7.28649	https://www.genecards.org/cgi-bin/carddisp.pl?gene=TNFSF10
SLC6A4	Solute Carrier Family 6 Member 4	Protein Coding	P31645	57	GC17M030194	7.27986	https://www.genecards.org/cgi-bin/carddisp.pl?gene=SLC6A4
CISD1	CDGSH Iron Sulfur Domain 1	Protein Coding	Q9NZ45	45	GC10P058269	7.27947	https://www.genecards.org/cgi-bin/carddisp.pl?gene=CISD1
ENO2	Enolase 2	Protein Coding	P09104	56	GC12P006913	7.27937	https://www.genecards.org/cgi-bin/carddisp.pl?gene=ENO2
SCN11A	Sodium Voltage-Gated Channel Alpha Subunit 11	Protein Coding	Q9UI33	52	GC03M038862	7.27634	https://www.genecards.org/cgi-bin/carddisp.pl?gene=SCN11A
CYP7A1	Cytochrome P450 Family 7 Subfamily A Member 1	Protein Coding	P22680	51	GC08M058490	7.27307	https://www.genecards.org/cgi-bin/carddisp.pl?gene=CYP7A1
PFKM	Phosphofructokinase, Muscle	Protein Coding	P08237	57	GC12P048105	7.26529	https://www.genecards.org/cgi-bin/carddisp.pl?gene=PFKM
UTS2R	Urotensin 2 Receptor	Protein Coding	Q9UKP6	50	GC17P113420	7.26462	https://www.genecards.org/cgi-bin/carddisp.pl?gene=UTS2R
DBP	D-Box Binding PAR BZIP Transcription Factor	Protein Coding	Q10586	46	GC19M048630	7.26098	https://www.genecards.org/cgi-bin/carddisp.pl?gene=DBP
PDGFRA	Platelet Derived Growth Factor Receptor Alpha	Protein Coding	P16234	62	GC04P054229	7.25791	https://www.genecards.org/cgi-bin/carddisp.pl?gene=PDGFRA
CFH	Complement Factor H	Protein Coding	P08603	56	GC01P196621	7.25789	https://www.genecards.org/cgi-bin/carddisp.pl?gene=CFH
SFTA3	Surfactant Associated 3	RNA Gene	P0C7M3	39	GC14M036474	7.25212	https://www.genecards.org/cgi-bin/carddisp.pl?gene=SFTA3
PTS	6-Pyruvoyltetrahydropterin Synthase	Protein Coding	Q03393	54	GC11P112226	7.24477	https://www.genecards.org/cgi-bin/carddisp.pl?gene=PTS
BCL7B	BAF Chromatin Remodeling Complex Subunit BCL7B	Protein Coding	Q9BQE9	45	GC07M073536	7.24444	https://www.genecards.org/cgi-bin/carddisp.pl?gene=BCL7B
PROM1	Prominin 1	Protein Coding	O43490	55	GC04M015965	7.22949	https://www.genecards.org/cgi-bin/carddisp.pl?gene=PROM1
ATRX	ATRX Chromatin Remodeler	Protein Coding	P46100	55	GC0XM077504	7.22868	https://www.genecards.org/cgi-bin/carddisp.pl?gene=ATRX
CD63	CD63 Molecule	Protein Coding	P08962	52	GC12M056016	7.21594	https://www.genecards.org/cgi-bin/carddisp.pl?gene=CD63
ODC1	Ornithine Decarboxylase 1	Protein Coding	P11926	57	GC02M010432	7.20431	https://www.genecards.org/cgi-bin/carddisp.pl?gene=ODC1
CCKBR	Cholecystokinin B Receptor	Protein Coding	P32239	53	GC11P006259	7.19575	https://www.genecards.org/cgi-bin/carddisp.pl?gene=CCKBR
FGA	Fibrinogen Alpha Chain	Protein Coding	P02671	58	GC04M154583	7.19457	https://www.genecards.org/cgi-bin/carddisp.pl?gene=FGA
MNX1	Motor Neuron And Pancreas Homeobox 1	Protein Coding	P50219	50	GC07M156994	7.18921	https://www.genecards.org/cgi-bin/carddisp.pl?gene=MNX1
ICOS	Inducible T Cell Costimulator	Protein Coding	Q9Y6W8	53	GC02P203937	7.18278	https://www.genecards.org/cgi-bin/carddisp.pl?gene=ICOS
GPX5	Glutathione Peroxidase 5	Protein Coding	O75715	47	GC06P028525	7.18235	https://www.genecards.org/cgi-bin/carddisp.pl?gene=GPX5
GPX6	Glutathione Peroxidase 6	Protein Coding	P59796	43	GC06M028503	7.18235	https://www.genecards.org/cgi-bin/carddisp.pl?gene=GPX6
CCR6	C-C Motif Chemokine Receptor 6	Protein Coding	P51684	52	GC06P167111	7.1804	https://www.genecards.org/cgi-bin/carddisp.pl?gene=CCR6
IL19	Interleukin 19	Protein Coding	Q9UHD0	48	GC01P206770	7.17762	https://www.genecards.org/cgi-bin/carddisp.pl?gene=IL19
ITGB3	Integrin Subunit Beta 3	Protein Coding	P05106	61	GC17P112532	7.17494	https://www.genecards.org/cgi-bin/carddisp.pl?gene=ITGB3
GNRH1	Gonadotropin Releasing Hormone 1	Protein Coding	P01148	50	GC08M025419	7.169	https://www.genecards.org/cgi-bin/carddisp.pl?gene=GNRH1
CDX2	Caudal Type Homeobox 2	Protein Coding	Q99626	51	GC13M027962	7.15665	https://www.genecards.org/cgi-bin/carddisp.pl?gene=CDX2
MKI67	Marker Of Proliferation Ki-67	Protein Coding	P46013	52	GC10M128096	7.15376	https://www.genecards.org/cgi-bin/carddisp.pl?gene=MKI67
XRCC4	X-Ray Repair Cross Complementing 4	Protein Coding	Q13426	51	GC05P083077	7.15294	https://www.genecards.org/cgi-bin/carddisp.pl?gene=XRCC4
PRPS1	Phosphoribosyl Pyrophosphate Synthetase 1	Protein Coding	P60891	56	GC0XP107628	7.14607	https://www.genecards.org/cgi-bin/carddisp.pl?gene=PRPS1
MIP	Major Intrinsic Protein Of Lens Fiber	Protein Coding	P30301	48	GC12M056449	7.14475	https://www.genecards.org/cgi-bin/carddisp.pl?gene=MIP
MYC	MYC Proto-Oncogene, BHLH Transcription Factor	Protein Coding	P01106	61	GC08P127735	7.13394	https://www.genecards.org/cgi-bin/carddisp.pl?gene=MYC
CASP9	Caspase 9	Protein Coding	P55211	56	GC01M015491	7.12164	https://www.genecards.org/cgi-bin/carddisp.pl?gene=CASP9
MT2A	Metallothionein 2A	Protein Coding	P02795	49	GC16P082422	7.12096	https://www.genecards.org/cgi-bin/carddisp.pl?gene=MT2A
GATA4	GATA Binding Protein 4	Protein Coding	P43694	58	GC08P011676	7.12069	https://www.genecards.org/cgi-bin/carddisp.pl?gene=GATA4
CXCR3	C-X-C Motif Chemokine Receptor 3	Protein Coding	P49682	53	GC0XM071615	7.11811	https://www.genecards.org/cgi-bin/carddisp.pl?gene=CXCR3
CLCNKA	Chloride Voltage-Gated Channel Ka	Protein Coding	P51800	48	GC01P016018	7.11007	https://www.genecards.org/cgi-bin/carddisp.pl?gene=CLCNKA
IPW	Imprinted In Prader-Willi Syndrome	RNA Gene		22	GC15P025116	7.10332	https://www.genecards.org/cgi-bin/carddisp.pl?gene=IPW
AFP	Alpha Fetoprotein	Protein Coding	P02771	56	GC04P073431	7.10058	https://www.genecards.org/cgi-bin/carddisp.pl?gene=AFP
IL6ST	Interleukin 6 Cytokine Family Signal Transducer	Protein Coding	P40189	59	GC05M055935	7.09769	https://www.genecards.org/cgi-bin/carddisp.pl?gene=IL6ST
GYG1	Glycogenin 1	Protein Coding	P46976	55	GC03P148991	7.09517	https://www.genecards.org/cgi-bin/carddisp.pl?gene=GYG1
SLC12A1	Solute Carrier Family 12 Member 1	Protein Coding	Q13621	56	GC15P157296	7.09106	https://www.genecards.org/cgi-bin/carddisp.pl?gene=SLC12A1
CFB	Complement Factor B	Protein Coding	P00751	55	GC06P031945	7.08636	https://www.genecards.org/cgi-bin/carddisp.pl?gene=CFB
AIP	Aryl Hydrocarbon Receptor Interacting Protein	Protein Coding	O00170	51	GC11P067468	7.07667	https://www.genecards.org/cgi-bin/carddisp.pl?gene=AIP
MIR374A	MicroRNA 374a	RNA Gene		25	GC0XM074300	7.06315	https://www.genecards.org/cgi-bin/carddisp.pl?gene=MIR374A
EIF2S3	Eukaryotic Translation Initiation Factor 2 Subunit Gamma	Protein Coding	P41091	53	GC0XP024054	7.05938	https://www.genecards.org/cgi-bin/carddisp.pl?gene=EIF2S3
LOC107133510	Origin Of Replication At HBB	Functional Element		10	GC11P005222	7.05754	https://www.genecards.org/cgi-bin/carddisp.pl?gene=LOC107133510
MIR574	MicroRNA 574	RNA Gene		27	GC04P039091	7.04995	https://www.genecards.org/cgi-bin/carddisp.pl?gene=MIR574
MCL1	MCL1 Apoptosis Regulator, BCL2 Family Member	Protein Coding	Q07820	56	GC01M160760	7.04516	https://www.genecards.org/cgi-bin/carddisp.pl?gene=MCL1
CACNA1C	Calcium Voltage-Gated Channel Subunit Alpha1 C	Protein Coding	Q13936	58	GC12P001970	7.03816	https://www.genecards.org/cgi-bin/carddisp.pl?gene=CACNA1C
ITGB4	Integrin Subunit Beta 4	Protein Coding	P16144	58	GC17P075721	7.03509	https://www.genecards.org/cgi-bin/carddisp.pl?gene=ITGB4
MIR136	MicroRNA 136	RNA Gene		27	GC14P115747	7.02906	https://www.genecards.org/cgi-bin/carddisp.pl?gene=MIR136
CARS1	Cysteinyl-TRNA Synthetase 1	Protein Coding	P49589	50	GC11M003000	7.02773	https://www.genecards.org/cgi-bin/carddisp.pl?gene=CARS1
TLX1NB	TLX1 Neighbor	RNA Gene	P0CAT3	31	GC10M101090	7.02494	https://www.genecards.org/cgi-bin/carddisp.pl?gene=TLX1NB
NCF4	Neutrophil Cytosolic Factor 4	Protein Coding	Q15080	55	GC22P036860	7.01545	https://www.genecards.org/cgi-bin/carddisp.pl?gene=NCF4
POLE	DNA Polymerase Epsilon, Catalytic Subunit	Protein Coding	Q07864	56	GC12M132779	7.01332	https://www.genecards.org/cgi-bin/carddisp.pl?gene=POLE
HMGA2	High Mobility Group AT-Hook 2	Protein Coding	P52926	52	GC12P065824	7.00587	https://www.genecards.org/cgi-bin/carddisp.pl?gene=HMGA2
TNFRSF6B	TNF Receptor Superfamily Member 6b	Protein Coding	O95407	50	GC20P063696	7.00265	https://www.genecards.org/cgi-bin/carddisp.pl?gene=TNFRSF6B
HAVCR2	Hepatitis A Virus Cellular Receptor 2	Protein Coding	Q8TDQ0	54	GC05M157063	6.99533	https://www.genecards.org/cgi-bin/carddisp.pl?gene=HAVCR2
C11orf65	Chromosome 11 Open Reading Frame 65	Protein Coding	Q8NCR3	40	GC11M108308	6.98932	https://www.genecards.org/cgi-bin/carddisp.pl?gene=C11orf65
GNA11	G Protein Subunit Alpha 11	Protein Coding	P29992	55	GC19P003094	6.97529	https://www.genecards.org/cgi-bin/carddisp.pl?gene=GNA11
ARG1	Arginase 1	Protein Coding	P05089	58	GC06P136455	6.97486	https://www.genecards.org/cgi-bin/carddisp.pl?gene=ARG1
LOX	Lysyl Oxidase	Protein Coding	P28300	56	GC05M122063	6.96616	https://www.genecards.org/cgi-bin/carddisp.pl?gene=LOX
PCAT1	Prostate Cancer Associated Transcript 1	RNA Gene		24	GC08P126553	6.95793	https://www.genecards.org/cgi-bin/carddisp.pl?gene=PCAT1
HSPA1L	Heat Shock Protein Family A (Hsp70) Member 1 Like	Protein Coding	P34931	51	GC06M031809	6.95465	https://www.genecards.org/cgi-bin/carddisp.pl?gene=HSPA1L
HULC	Hepatocellular Carcinoma Up-Regulated Long Non-Coding RNA	RNA Gene		28	GC06P008478	6.95102	https://www.genecards.org/cgi-bin/carddisp.pl?gene=HULC
TWNK	Twinkle MtDNA Helicase	Protein Coding	Q96RR1	50	GC10P109747	6.95001	https://www.genecards.org/cgi-bin/carddisp.pl?gene=TWNK
CD55	CD55 Molecule (Cromer Blood Group)	Protein Coding	P08174	58	GC01P207321	6.94746	https://www.genecards.org/cgi-bin/carddisp.pl?gene=CD55
TNFRSF10A	TNF Receptor Superfamily Member 10a	Protein Coding	O00220	54	GC08M023190	6.93973	https://www.genecards.org/cgi-bin/carddisp.pl?gene=TNFRSF10A
GREM1	Gremlin 1, DAN Family BMP Antagonist	Protein Coding	O60565	52	GC15P156897	6.93092	https://www.genecards.org/cgi-bin/carddisp.pl?gene=GREM1
FOXO3	Forkhead Box O3	Protein Coding	O43524	56	GC06P108559	6.92858	https://www.genecards.org/cgi-bin/carddisp.pl?gene=FOXO3
USP8	Ubiquitin Specific Peptidase 8	Protein Coding	P40818	55	GC15P050424	6.92277	https://www.genecards.org/cgi-bin/carddisp.pl?gene=USP8
GHSR	Growth Hormone Secretagogue Receptor	Protein Coding	Q92847	55	GC03M172443	6.91891	https://www.genecards.org/cgi-bin/carddisp.pl?gene=GHSR
FKBP6	FKBP Prolyl Isomerase Family Member 6 (Inactive)	Protein Coding	O75344	48	GC07P073328	6.90642	https://www.genecards.org/cgi-bin/carddisp.pl?gene=FKBP6
NBN	Nibrin	Protein Coding	O60934	57	GC08M089933	6.90019	https://www.genecards.org/cgi-bin/carddisp.pl?gene=NBN
BPI	Bactericidal Permeability Increasing Protein	Protein Coding	P17213	50	GC20P038304	6.89429	https://www.genecards.org/cgi-bin/carddisp.pl?gene=BPI
PYGM	Glycogen Phosphorylase, Muscle Associated	Protein Coding	P11217	55	GC11M064746	6.887	https://www.genecards.org/cgi-bin/carddisp.pl?gene=PYGM
MIR7-3HG	MIR7-3 Host Gene	RNA Gene	Q8N6C7	34	GC19P112015	6.88056	https://www.genecards.org/cgi-bin/carddisp.pl?gene=MIR7-3HG
MUC1	Mucin 1, Cell Surface Associated	Protein Coding	P15941	56	GC01M155185	6.87366	https://www.genecards.org/cgi-bin/carddisp.pl?gene=MUC1
DDAH2	DDAH Family Member 2, ADMA-Independent	Protein Coding	O95865	49	GC06M031727	6.87002	https://www.genecards.org/cgi-bin/carddisp.pl?gene=DDAH2
PWRN1	Prader-Willi Region Non-Protein Coding RNA 1	RNA Gene		26	GC15P165213	6.86691	https://www.genecards.org/cgi-bin/carddisp.pl?gene=PWRN1
CXCL5	C-X-C Motif Chemokine Ligand 5	Protein Coding	P42830	48	GC04M073995	6.85979	https://www.genecards.org/cgi-bin/carddisp.pl?gene=CXCL5
PTGER2	Prostaglandin E Receptor 2	Protein Coding	P43116	57	GC14P052314	6.85105	https://www.genecards.org/cgi-bin/carddisp.pl?gene=PTGER2
NOX1	NADPH Oxidase 1	Protein Coding	Q9Y5S8	52	GC0XM100843	6.84369	https://www.genecards.org/cgi-bin/carddisp.pl?gene=NOX1
AGPAT1	1-Acylglycerol-3-Phosphate O-Acyltransferase 1	Protein Coding	Q99943	46	GC06M032168	6.83879	https://www.genecards.org/cgi-bin/carddisp.pl?gene=AGPAT1
MFN2	Mitofusin 2	Protein Coding	O95140	57	GC01P011980	6.83686	https://www.genecards.org/cgi-bin/carddisp.pl?gene=MFN2
IRF1	Interferon Regulatory Factor 1	Protein Coding	P10914	55	GC05M132440	6.82962	https://www.genecards.org/cgi-bin/carddisp.pl?gene=IRF1
MIR301A	MicroRNA 301a	RNA Gene		26	GC17M059151	6.82644	https://www.genecards.org/cgi-bin/carddisp.pl?gene=MIR301A
DUSP1	Dual Specificity Phosphatase 1	Protein Coding	P28562	54	GC05M172768	6.82188	https://www.genecards.org/cgi-bin/carddisp.pl?gene=DUSP1
CLIP2	CAP-Gly Domain Containing Linker Protein 2	Protein Coding	Q9UDT6	47	GC07P074289	6.81223	https://www.genecards.org/cgi-bin/carddisp.pl?gene=CLIP2
NKX2-3	NK2 Homeobox 3	Protein Coding	Q8TAU0	41	GC10P099532	6.80431	https://www.genecards.org/cgi-bin/carddisp.pl?gene=NKX2-3
IDH2	Isocitrate Dehydrogenase (NADP(+)) 2	Protein Coding	P48735	60	GC15M090083	6.80017	https://www.genecards.org/cgi-bin/carddisp.pl?gene=IDH2
CPT2	Carnitine Palmitoyltransferase 2	Protein Coding	P23786	59	GC01P053196	6.79901	https://www.genecards.org/cgi-bin/carddisp.pl?gene=CPT2
SMAD2	SMAD Family Member 2	Protein Coding	Q15796	60	GC18M047809	6.7955	https://www.genecards.org/cgi-bin/carddisp.pl?gene=SMAD2
LOC129992892	ATAC-STARR-Seq Lymphoblastoid Silent Region 15603	Functional Element		5	GC04P102872	6.78982	https://www.genecards.org/cgi-bin/carddisp.pl?gene=LOC129992892
DEFB1	Defensin Beta 1	Protein Coding	P60022	47	GC08M006870	6.77845	https://www.genecards.org/cgi-bin/carddisp.pl?gene=DEFB1
CXCL9	C-X-C Motif Chemokine Ligand 9	Protein Coding	Q07325	48	GC04M076001	6.76783	https://www.genecards.org/cgi-bin/carddisp.pl?gene=CXCL9
MIR128-2	MicroRNA 128-2	RNA Gene		27	GC03P035754	6.753	https://www.genecards.org/cgi-bin/carddisp.pl?gene=MIR128-2
CXCR2	C-X-C Motif Chemokine Receptor 2	Protein Coding	P25025	59	GC02P218125	6.73359	https://www.genecards.org/cgi-bin/carddisp.pl?gene=CXCR2
IRF8	Interferon Regulatory Factor 8	Protein Coding	Q02556	54	GC16P094239	6.72994	https://www.genecards.org/cgi-bin/carddisp.pl?gene=IRF8
RTEL1	Regulator Of Telomere Elongation Helicase 1	Protein Coding	Q9NZ71	51	GC20P066991	6.70006	https://www.genecards.org/cgi-bin/carddisp.pl?gene=RTEL1
NPHP1	Nephrocystin 1	Protein Coding	O15259	52	GC02M110122	6.69813	https://www.genecards.org/cgi-bin/carddisp.pl?gene=NPHP1
CAMP	Cathelicidin Antimicrobial Peptide	Protein Coding	P49913	48	GC03P057576	6.69794	https://www.genecards.org/cgi-bin/carddisp.pl?gene=CAMP
CYLD	CYLD Lysine 63 Deubiquitinase	Protein Coding	Q9NQC7	56	GC16P050742	6.6927	https://www.genecards.org/cgi-bin/carddisp.pl?gene=CYLD
AQP9	Aquaporin 9	Protein Coding	O43315	50	GC15P058138	6.68664	https://www.genecards.org/cgi-bin/carddisp.pl?gene=AQP9
MAF	MAF BZIP Transcription Factor	Protein Coding	O75444	54	GC16M079204	6.67828	https://www.genecards.org/cgi-bin/carddisp.pl?gene=MAF
FADS2	Fatty Acid Desaturase 2	Protein Coding	O95864	51	GC11P061792	6.67597	https://www.genecards.org/cgi-bin/carddisp.pl?gene=FADS2
IL12RB1	Interleukin 12 Receptor Subunit Beta 1	Protein Coding	P42701	54	GC19M018058	6.66969	https://www.genecards.org/cgi-bin/carddisp.pl?gene=IL12RB1
CRIPTO	Cripto, EGF-CFC Family Member	Protein Coding	P13385	48	GC03P058241	6.66667	https://www.genecards.org/cgi-bin/carddisp.pl?gene=CRIPTO
ASCC1	Activating Signal Cointegrator 1 Complex Subunit 1	Protein Coding	Q8N9N2	50	GC10M072096	6.66513	https://www.genecards.org/cgi-bin/carddisp.pl?gene=ASCC1
CXCR4	C-X-C Motif Chemokine Receptor 4	Protein Coding	P61073	61	GC02M136114	6.663	https://www.genecards.org/cgi-bin/carddisp.pl?gene=CXCR4
AVPR1B	Arginine Vasopressin Receptor 1B	Protein Coding	P47901	52	GC01M206109	6.65912	https://www.genecards.org/cgi-bin/carddisp.pl?gene=AVPR1B
TRH	Thyrotropin Releasing Hormone	Protein Coding	P20396	50	GC03P129974	6.6569	https://www.genecards.org/cgi-bin/carddisp.pl?gene=TRH
EPHB4	EPH Receptor B4	Protein Coding	P54760	62	GC07M105312	6.65422	https://www.genecards.org/cgi-bin/carddisp.pl?gene=EPHB4
KCNA3	Potassium Voltage-Gated Channel Subfamily A Member 3	Protein Coding	P22001	53	GC01M110654	6.65334	https://www.genecards.org/cgi-bin/carddisp.pl?gene=KCNA3
GSDMB	Gasdermin B	Protein Coding	Q8TAX9	42	GC17M039904	6.64826	https://www.genecards.org/cgi-bin/carddisp.pl?gene=GSDMB
LZTFL1	Leucine Zipper Transcription Factor Like 1	Protein Coding	Q9NQ48	47	GC03M045823	6.63628	https://www.genecards.org/cgi-bin/carddisp.pl?gene=LZTFL1
ADCY3	Adenylate Cyclase 3	Protein Coding	O60266	55	GC02M024819	6.63403	https://www.genecards.org/cgi-bin/carddisp.pl?gene=ADCY3
PKHD1	PKHD1 Ciliary IPT Domain Containing Fibrocystin/Polyductin	Protein Coding	P08F94	47	GC06M094108	6.62736	https://www.genecards.org/cgi-bin/carddisp.pl?gene=PKHD1
CCL4	C-C Motif Chemokine Ligand 4	Protein Coding	P13236	50	GC17P036103	6.62734	https://www.genecards.org/cgi-bin/carddisp.pl?gene=CCL4
CTHRC1	Collagen Triple Helix Repeat Containing 1	Protein Coding	Q96CG8	48	GC08P103371	6.62612	https://www.genecards.org/cgi-bin/carddisp.pl?gene=CTHRC1
ADAR	Adenosine Deaminase RNA Specific	Protein Coding	P55265	54	GC01M160957	6.62609	https://www.genecards.org/cgi-bin/carddisp.pl?gene=ADAR
NSD2	Nuclear Receptor Binding SET Domain Protein 2	Protein Coding	O96028	53	GC04P003990	6.62492	https://www.genecards.org/cgi-bin/carddisp.pl?gene=NSD2
BSG	Basigin (Ok Blood Group)	Protein Coding	P35613	53	GC19P000571	6.62333	https://www.genecards.org/cgi-bin/carddisp.pl?gene=BSG
CLDN2	Claudin 2	Protein Coding	P57739	50	GC0XP106900	6.61597	https://www.genecards.org/cgi-bin/carddisp.pl?gene=CLDN2
CYP24A1	Cytochrome P450 Family 24 Subfamily A Member 1	Protein Coding	Q07973	55	GC20M054153	6.61532	https://www.genecards.org/cgi-bin/carddisp.pl?gene=CYP24A1
ABO	ABO, Alpha 1-3-N-Acetylgalactosaminyltransferase And Alpha 1-3-Galactosyltransferase	Protein Coding	P16442	46	GC09M133250	6.61477	https://www.genecards.org/cgi-bin/carddisp.pl?gene=ABO
SNHG16	Small Nucleolar RNA Host Gene 16	RNA Gene		26	GC17P113183	6.61443	https://www.genecards.org/cgi-bin/carddisp.pl?gene=SNHG16
MGMT	O-6-Methylguanine-DNA Methyltransferase	Protein Coding	P16455	57	GC10P129467	6.60297	https://www.genecards.org/cgi-bin/carddisp.pl?gene=MGMT
MIR499A	MicroRNA 499a	RNA Gene		29	GC20P034990	6.59731	https://www.genecards.org/cgi-bin/carddisp.pl?gene=MIR499A
SPRY4-IT1	SPRY4 Intronic Transcript 1	RNA Gene		21	GC05M142318	6.59517	https://www.genecards.org/cgi-bin/carddisp.pl?gene=SPRY4-IT1
THBS2	Thrombospondin 2	Protein Coding	P35442	55	GC06M169215	6.5909	https://www.genecards.org/cgi-bin/carddisp.pl?gene=THBS2
BRIP1	BRCA1 Interacting Helicase 1	Protein Coding	Q9BX63	57	GC17M061679	6.58511	https://www.genecards.org/cgi-bin/carddisp.pl?gene=BRIP1
NSD1	Nuclear Receptor Binding SET Domain Protein 1	Protein Coding	Q96L73	53	GC05P186642	6.57666	https://www.genecards.org/cgi-bin/carddisp.pl?gene=NSD1
LINC00261	Long Intergenic Non-Protein Coding RNA 261	RNA Gene		26	GC20M022529	6.5729	https://www.genecards.org/cgi-bin/carddisp.pl?gene=LINC00261
SOX2-OT	SOX2 Overlapping Transcript	RNA Gene		32	GC03P180989	6.57183	https://www.genecards.org/cgi-bin/carddisp.pl?gene=SOX2-OT
MIR129-1	MicroRNA 129-1	RNA Gene		24	GC07P128207	6.57177	https://www.genecards.org/cgi-bin/carddisp.pl?gene=MIR129-1
CNR2	Cannabinoid Receptor 2	Protein Coding	P34972	54	GC01M023870	6.56967	https://www.genecards.org/cgi-bin/carddisp.pl?gene=CNR2
CD68	CD68 Molecule	Protein Coding	P34810	49	GC17P007579	6.56597	https://www.genecards.org/cgi-bin/carddisp.pl?gene=CD68
PLAUR	Plasminogen Activator, Urokinase Receptor	Protein Coding	Q03405	53	GC19M043646	6.56334	https://www.genecards.org/cgi-bin/carddisp.pl?gene=PLAUR
MIR28	MicroRNA 28	RNA Gene		26	GC03P188688	6.56264	https://www.genecards.org/cgi-bin/carddisp.pl?gene=MIR28
IFNB1	Interferon Beta 1	Protein Coding	P01574	52	GC09M021077	6.5624	https://www.genecards.org/cgi-bin/carddisp.pl?gene=IFNB1
IL27	Interleukin 27	Protein Coding	Q8NEV9	45	GC16M043863	6.55263	https://www.genecards.org/cgi-bin/carddisp.pl?gene=IL27
PRKAR1A	Protein Kinase CAMP-Dependent Type I Regulatory Subunit Alpha	Protein Coding	P10644	60	GC17P112990	6.5484	https://www.genecards.org/cgi-bin/carddisp.pl?gene=PRKAR1A
ELMO1	Engulfment And Cell Motility 1	Protein Coding	Q92556	48	GC07M036860	6.54591	https://www.genecards.org/cgi-bin/carddisp.pl?gene=ELMO1
NCOA1	Nuclear Receptor Coactivator 1	Protein Coding	Q15788	53	GC02P024492	6.53902	https://www.genecards.org/cgi-bin/carddisp.pl?gene=NCOA1
UCA1	Urothelial Cancer Associated 1	RNA Gene		30	GC19P121729	6.53684	https://www.genecards.org/cgi-bin/carddisp.pl?gene=UCA1
MIR199A2	MicroRNA 199a-2	RNA Gene		26	GC01M172235	6.53617	https://www.genecards.org/cgi-bin/carddisp.pl?gene=MIR199A2
MME	Membrane Metalloendopeptidase	Protein Coding	P08473	59	GC03P155024	6.53432	https://www.genecards.org/cgi-bin/carddisp.pl?gene=MME
BCL11A	BCL11 Transcription Factor A	Protein Coding	Q9H165	52	GC02M060451	6.53367	https://www.genecards.org/cgi-bin/carddisp.pl?gene=BCL11A
C4B	Complement C4B (Chido/Rodgers Blood Group)	Protein Coding	P0C0L5	51	GC06P032014	6.53125	https://www.genecards.org/cgi-bin/carddisp.pl?gene=C4B
LOC126806658	BRD4-Independent Group 4 Enhancer GRCh37_chr3:41265899-41267098	Functional Element		10	GC03P041224	6.53004	https://www.genecards.org/cgi-bin/carddisp.pl?gene=LOC126806658
MADCAM1	Mucosal Vascular Addressin Cell Adhesion Molecule 1	Protein Coding	Q13477	49	GC19P111791	6.51211	https://www.genecards.org/cgi-bin/carddisp.pl?gene=MADCAM1
HNF4G	Hepatocyte Nuclear Factor 4 Gamma	Protein Coding	Q14541	49	GC08P075407	6.50905	https://www.genecards.org/cgi-bin/carddisp.pl?gene=HNF4G
KLF6	KLF Transcription Factor 6	Protein Coding	Q99612	53	GC10M003779	6.50565	https://www.genecards.org/cgi-bin/carddisp.pl?gene=KLF6
TNFSF4	TNF Superfamily Member 4	Protein Coding	P23510	51	GC01M173183	6.505	https://www.genecards.org/cgi-bin/carddisp.pl?gene=TNFSF4
MIR30D	MicroRNA 30d	RNA Gene		24	GC08M134804	6.50375	https://www.genecards.org/cgi-bin/carddisp.pl?gene=MIR30D
F9	Coagulation Factor IX	Protein Coding	P00740	56	GC0XP139530	6.49626	https://www.genecards.org/cgi-bin/carddisp.pl?gene=F9
BRINP3	BMP/Retinoic Acid Inducible Neural Specific 3	Protein Coding	Q76B58	39	GC01M190067	6.49569	https://www.genecards.org/cgi-bin/carddisp.pl?gene=BRINP3
EIF4H	Eukaryotic Translation Initiation Factor 4H	Protein Coding	Q15056	49	GC07P074174	6.49368	https://www.genecards.org/cgi-bin/carddisp.pl?gene=EIF4H
TJP1	Tight Junction Protein 1	Protein Coding	Q07157	54	GC15M029699	6.4926	https://www.genecards.org/cgi-bin/carddisp.pl?gene=TJP1
POU5F1	POU Class 5 Homeobox 1	Protein Coding	Q01860	55	GC06M093732	6.48793	https://www.genecards.org/cgi-bin/carddisp.pl?gene=POU5F1
STAR	Steroidogenic Acute Regulatory Protein	Protein Coding	P49675	53	GC08M038250	6.48494	https://www.genecards.org/cgi-bin/carddisp.pl?gene=STAR
DGAT1	Diacylglycerol O-Acyltransferase 1	Protein Coding	O75907	55	GC08M146612	6.483	https://www.genecards.org/cgi-bin/carddisp.pl?gene=DGAT1
NPM1	Nucleophosmin 1	Protein Coding	P06748	59	GC05P171387	6.47621	https://www.genecards.org/cgi-bin/carddisp.pl?gene=NPM1
MIR373	MicroRNA 373	RNA Gene		27	GC19P113661	6.47079	https://www.genecards.org/cgi-bin/carddisp.pl?gene=MIR373
TYMS	Thymidylate Synthetase	Protein Coding	P04818	59	GC18P000657	6.46968	https://www.genecards.org/cgi-bin/carddisp.pl?gene=TYMS
MT-ATP8	Mitochondrially Encoded ATP Synthase Membrane Subunit 8	Protein Coding	P03928	38	GCMTP008368	6.46754	https://www.genecards.org/cgi-bin/carddisp.pl?gene=MT-ATP8
CIITA	Class II Major Histocompatibility Complex Transactivator	Protein Coding	P33076	53	GC16P080655	6.46359	https://www.genecards.org/cgi-bin/carddisp.pl?gene=CIITA
ATF4	Activating Transcription Factor 4	Protein Coding	P18848	55	GC22P039519	6.45844	https://www.genecards.org/cgi-bin/carddisp.pl?gene=ATF4
RRM2B	Ribonucleotide Reductase Regulatory TP53 Inducible Subunit M2B	Protein Coding	Q7LG56	57	GC08M102204	6.45694	https://www.genecards.org/cgi-bin/carddisp.pl?gene=RRM2B
IL26	Interleukin 26	Protein Coding	Q9NPH9	45	GC12M068201	6.44969	https://www.genecards.org/cgi-bin/carddisp.pl?gene=IL26
RXRA	Retinoid X Receptor Alpha	Protein Coding	P19793	57	GC09P134317	6.44948	https://www.genecards.org/cgi-bin/carddisp.pl?gene=RXRA
GFPT2	Glutamine-Fructose-6-Phosphate Transaminase 2	Protein Coding	O94808	47	GC05M180300	6.44726	https://www.genecards.org/cgi-bin/carddisp.pl?gene=GFPT2
MOG	Myelin Oligodendrocyte Glycoprotein	Protein Coding	Q16653	54	GC06P134753	6.44599	https://www.genecards.org/cgi-bin/carddisp.pl?gene=MOG
BTC	Betacellulin	Protein Coding	P35070	53	GC04M074744	6.44266	https://www.genecards.org/cgi-bin/carddisp.pl?gene=BTC
COL7A1	Collagen Type VII Alpha 1 Chain	Protein Coding	Q02388	52	GC03M048564	6.43255	https://www.genecards.org/cgi-bin/carddisp.pl?gene=COL7A1
EPHX1	Epoxide Hydrolase 1	Protein Coding	P07099	53	GC01P225810	6.4308	https://www.genecards.org/cgi-bin/carddisp.pl?gene=EPHX1
CX3CL1	C-X3-C Motif Chemokine Ligand 1	Protein Coding	P78423	53	GC16P057372	6.42931	https://www.genecards.org/cgi-bin/carddisp.pl?gene=CX3CL1
CDK2	Cyclin Dependent Kinase 2	Protein Coding	P24941	60	GC12P055966	6.42598	https://www.genecards.org/cgi-bin/carddisp.pl?gene=CDK2
GHRH	Growth Hormone Releasing Hormone	Protein Coding	P01286	47	GC20M037251	6.4204	https://www.genecards.org/cgi-bin/carddisp.pl?gene=GHRH
HBA2	Hemoglobin Subunit Alpha 2	Protein Coding	P69905	50	GC16P080150	6.40574	https://www.genecards.org/cgi-bin/carddisp.pl?gene=HBA2
PDCD1LG2	Programmed Cell Death 1 Ligand 2	Protein Coding	Q9BQ51	51	GC09P005510	6.40434	https://www.genecards.org/cgi-bin/carddisp.pl?gene=PDCD1LG2
GATA1	GATA Binding Protein 1	Protein Coding	P15976	55	GC0XP048786	6.40108	https://www.genecards.org/cgi-bin/carddisp.pl?gene=GATA1
RNPEPL1	Arginyl Aminopeptidase Like 1	Protein Coding	Q9HAU8	43	GC02P240565	6.38333	https://www.genecards.org/cgi-bin/carddisp.pl?gene=RNPEPL1
SNHG5	Small Nucleolar RNA Host Gene 5	RNA Gene		28	GC06M085650	6.37073	https://www.genecards.org/cgi-bin/carddisp.pl?gene=SNHG5
LOC106099062	HBB Recombination Region	Functional Element		10	GC11P010854	6.37053	https://www.genecards.org/cgi-bin/carddisp.pl?gene=LOC106099062
ATXN2	Ataxin 2	Protein Coding	Q99700	53	GC12M111443	6.36727	https://www.genecards.org/cgi-bin/carddisp.pl?gene=ATXN2
SLC16A1	Solute Carrier Family 16 Member 1	Protein Coding	P53985	56	GC01M113100	6.3589	https://www.genecards.org/cgi-bin/carddisp.pl?gene=SLC16A1
LIMK1	LIM Domain Kinase 1	Protein Coding	P53667	57	GC07P074082	6.35004	https://www.genecards.org/cgi-bin/carddisp.pl?gene=LIMK1
TSC2	TSC Complex Subunit 2	Protein Coding	P49815	60	GC16P080239	6.34652	https://www.genecards.org/cgi-bin/carddisp.pl?gene=TSC2
TRAF6	TNF Receptor Associated Factor 6	Protein Coding	Q9Y4K3	55	GC11M036467	6.34613	https://www.genecards.org/cgi-bin/carddisp.pl?gene=TRAF6
MMP13	Matrix Metallopeptidase 13	Protein Coding	P45452	59	GC11M102942	6.34539	https://www.genecards.org/cgi-bin/carddisp.pl?gene=MMP13
MTR	5-Methyltetrahydrofolate-Homocysteine Methyltransferase	Protein Coding	Q99707	56	GC01P236795	6.32342	https://www.genecards.org/cgi-bin/carddisp.pl?gene=MTR
TGFBR1	Transforming Growth Factor Beta Receptor 1	Protein Coding	P36897	62	GC09P100712	6.316	https://www.genecards.org/cgi-bin/carddisp.pl?gene=TGFBR1
DUOX2	Dual Oxidase 2	Protein Coding	Q9NRD8	52	GC15M045092	6.31302	https://www.genecards.org/cgi-bin/carddisp.pl?gene=DUOX2
SYP	Synaptophysin	Protein Coding	P08247	55	GC0XM049187	6.31079	https://www.genecards.org/cgi-bin/carddisp.pl?gene=SYP
CXCR1	C-X-C Motif Chemokine Receptor 1	Protein Coding	P25024	52	GC02M218162	6.30973	https://www.genecards.org/cgi-bin/carddisp.pl?gene=CXCR1
PRDM16	PR/SET Domain 16	Protein Coding	Q9HAZ2	53	GC01P020557	6.30953	https://www.genecards.org/cgi-bin/carddisp.pl?gene=PRDM16
ZFAS1	ZNFX1 Antisense RNA 1	RNA Gene		28	GC20P049276	6.30413	https://www.genecards.org/cgi-bin/carddisp.pl?gene=ZFAS1
AOC1	Amine Oxidase Copper Containing 1	Protein Coding	P19801	50	GC07P150824	6.30286	https://www.genecards.org/cgi-bin/carddisp.pl?gene=AOC1
TYMP	Thymidine Phosphorylase	Protein Coding	P19971	56	GC22M050525	6.30258	https://www.genecards.org/cgi-bin/carddisp.pl?gene=TYMP
NFKBIL1	NFKB Inhibitor Like 1	Protein Coding	Q9UBC1	43	GC06P134817	6.30045	https://www.genecards.org/cgi-bin/carddisp.pl?gene=NFKBIL1
HPSE	Heparanase	Protein Coding	Q9Y251	53	GC04M083292	6.29128	https://www.genecards.org/cgi-bin/carddisp.pl?gene=HPSE
ATRIP-TREX1	ATRIP-TREX1 Readthrough	RNA Gene		13	GC03P057589	6.28869	https://www.genecards.org/cgi-bin/carddisp.pl?gene=ATRIP-TREX1
RASGRP1	RAS Guanyl Releasing Protein 1	Protein Coding	O95267	54	GC15M038488	6.28568	https://www.genecards.org/cgi-bin/carddisp.pl?gene=RASGRP1
GTF2IRD2	GTF2I Repeat Domain Containing 2	Protein Coding	Q86UP8	40	GC07M074796	6.28364	https://www.genecards.org/cgi-bin/carddisp.pl?gene=GTF2IRD2
VPS37D	VPS37D Subunit Of ESCRT-I	Protein Coding	Q86XT2	39	GC07P086242	6.28364	https://www.genecards.org/cgi-bin/carddisp.pl?gene=VPS37D
PGC	Progastricsin	Protein Coding	P20142	51	GC06M041736	6.28326	https://www.genecards.org/cgi-bin/carddisp.pl?gene=PGC
TFF3	Trefoil Factor 3	Protein Coding	Q07654	50	GC21M042311	6.27816	https://www.genecards.org/cgi-bin/carddisp.pl?gene=TFF3
DPYD	Dihydropyrimidine Dehydrogenase	Protein Coding	Q12882	60	GC01M097015	6.2753	https://www.genecards.org/cgi-bin/carddisp.pl?gene=DPYD
BANCR	BRAF-Activated Non-Protein Coding RNA	RNA Gene		21	GC09M069296	6.27234	https://www.genecards.org/cgi-bin/carddisp.pl?gene=BANCR
SYK	Spleen Associated Tyrosine Kinase	Protein Coding	P43405	59	GC09P099958	6.27171	https://www.genecards.org/cgi-bin/carddisp.pl?gene=SYK
GYS2	Glycogen Synthase 2	Protein Coding	P54840	53	GC12M029641	6.26873	https://www.genecards.org/cgi-bin/carddisp.pl?gene=GYS2
ADCY10	Adenylate Cyclase 10	Protein Coding	Q96PN6	52	GC01M167809	6.26697	https://www.genecards.org/cgi-bin/carddisp.pl?gene=ADCY10
STUB1	STIP1 Homology And U-Box Containing Protein 1	Protein Coding	Q9UNE7	54	GC16P080174	6.26055	https://www.genecards.org/cgi-bin/carddisp.pl?gene=STUB1
MIR92A1	MicroRNA 92a-1	RNA Gene		26	GC13P091682	6.25935	https://www.genecards.org/cgi-bin/carddisp.pl?gene=MIR92A1
SLC26A3	Solute Carrier Family 26 Member 3	Protein Coding	P40879	54	GC07M107765	6.25621	https://www.genecards.org/cgi-bin/carddisp.pl?gene=SLC26A3
GPX8	Glutathione Peroxidase 8 (Putative)	Protein Coding	Q8TED1	47	GC05P055160	6.25613	https://www.genecards.org/cgi-bin/carddisp.pl?gene=GPX8
VIM	Vimentin	Protein Coding	P08670	60	GC10P017227	6.24072	https://www.genecards.org/cgi-bin/carddisp.pl?gene=VIM
SIK2	Salt Inducible Kinase 2	Protein Coding	Q9H0K1	52	GC11P112482	6.23829	https://www.genecards.org/cgi-bin/carddisp.pl?gene=SIK2
DLL1	Delta Like Canonical Notch Ligand 1	Protein Coding	O00548	53	GC06M170282	6.23759	https://www.genecards.org/cgi-bin/carddisp.pl?gene=DLL1
DDX39B	DExD-Box Helicase 39B	Protein Coding	Q13838	50	GC06M031530	6.23442	https://www.genecards.org/cgi-bin/carddisp.pl?gene=DDX39B
CYP11B2	Cytochrome P450 Family 11 Subfamily B Member 2	Protein Coding	P19099	55	GC08M142910	6.2289	https://www.genecards.org/cgi-bin/carddisp.pl?gene=CYP11B2
BMP7	Bone Morphogenetic Protein 7	Protein Coding	P18075	55	GC20M057168	6.2289	https://www.genecards.org/cgi-bin/carddisp.pl?gene=BMP7
IL1RAPL2	Interleukin 1 Receptor Accessory Protein Like 2	Protein Coding	Q9NP60	48	GC0XP104566	6.22619	https://www.genecards.org/cgi-bin/carddisp.pl?gene=IL1RAPL2
RUNX3	RUNX Family Transcription Factor 3	Protein Coding	Q13761	52	GC01M024899	6.22521	https://www.genecards.org/cgi-bin/carddisp.pl?gene=RUNX3
PLUT	PDX1 Associated LncRNA, Upregulator Of Transcription	RNA Gene		21	GC13M027830	6.21914	https://www.genecards.org/cgi-bin/carddisp.pl?gene=PLUT
BANK1	B Cell Scaffold Protein With Ankyrin Repeats 1	Protein Coding	Q8NDB2	45	GC04P101411	6.21332	https://www.genecards.org/cgi-bin/carddisp.pl?gene=BANK1
ANGPTL3	Angiopoietin Like 3	Protein Coding	Q9Y5C1	56	GC01P062597	6.2103	https://www.genecards.org/cgi-bin/carddisp.pl?gene=ANGPTL3
SLC11A2	Solute Carrier Family 11 Member 2	Protein Coding	P49281	57	GC12M050952	6.20883	https://www.genecards.org/cgi-bin/carddisp.pl?gene=SLC11A2
NRP1	Neuropilin 1	Protein Coding	O14786	56	GC10M033177	6.2059	https://www.genecards.org/cgi-bin/carddisp.pl?gene=NRP1
VEGFB	Vascular Endothelial Growth Factor B	Protein Coding	P49765	52	GC11P064234	6.20507	https://www.genecards.org/cgi-bin/carddisp.pl?gene=VEGFB
TOR1A	Torsin Family 1 Member A	Protein Coding	O14656	55	GC09M129812	6.20488	https://www.genecards.org/cgi-bin/carddisp.pl?gene=TOR1A
SRP54	Signal Recognition Particle 54	Protein Coding	P61011	50	GC14P034981	6.19929	https://www.genecards.org/cgi-bin/carddisp.pl?gene=SRP54
RNASEH2C	Ribonuclease H2 Subunit C	Protein Coding	Q8TDP1	47	GC11M065714	6.1876	https://www.genecards.org/cgi-bin/carddisp.pl?gene=RNASEH2C
RNASE3	Ribonuclease A Family Member 3	Protein Coding	P12724	49	GC14P020891	6.18409	https://www.genecards.org/cgi-bin/carddisp.pl?gene=RNASE3
KRT20	Keratin 20	Protein Coding	P35900	49	GC17M040875	6.17899	https://www.genecards.org/cgi-bin/carddisp.pl?gene=KRT20
SP1	Sp1 Transcription Factor	Protein Coding	P08047	55	GC12P053380	6.1782	https://www.genecards.org/cgi-bin/carddisp.pl?gene=SP1
CTSD	Cathepsin D	Protein Coding	P07339	61	GC11M001752	6.17797	https://www.genecards.org/cgi-bin/carddisp.pl?gene=CTSD
PDPK1	3-Phosphoinositide Dependent Protein Kinase 1	Protein Coding	O15530	58	GC16P002537	6.17243	https://www.genecards.org/cgi-bin/carddisp.pl?gene=PDPK1
IL18BP	Interleukin 18 Binding Protein	Protein Coding	O95998	50	GC11P071998	6.17199	https://www.genecards.org/cgi-bin/carddisp.pl?gene=IL18BP
GRB10	Growth Factor Receptor Bound Protein 10	Protein Coding	Q13322	51	GC07M050590	6.15204	https://www.genecards.org/cgi-bin/carddisp.pl?gene=GRB10
BCL2L11	BCL2 Like 11	Protein Coding	O43521	53	GC02P111119	6.15146	https://www.genecards.org/cgi-bin/carddisp.pl?gene=BCL2L11
LDHA	Lactate Dehydrogenase A	Protein Coding	P00338	59	GC11P018394	6.1497	https://www.genecards.org/cgi-bin/carddisp.pl?gene=LDHA
CDH3	Cadherin 3	Protein Coding	P22223	55	GC16P082924	6.14876	https://www.genecards.org/cgi-bin/carddisp.pl?gene=CDH3
AQP8	Aquaporin 8	Protein Coding	O94778	45	GC16P081226	6.13776	https://www.genecards.org/cgi-bin/carddisp.pl?gene=AQP8
IGHE	Immunoglobulin Heavy Constant Epsilon	Protein Coding	P01854	40	GC14M119997	6.12763	https://www.genecards.org/cgi-bin/carddisp.pl?gene=IGHE
MT-TF	Mitochondrially Encoded TRNA-Phe (UUU/C)	RNA Gene		19	GCMTP000580	6.12455	https://www.genecards.org/cgi-bin/carddisp.pl?gene=MT-TF
GLA	Galactosidase Alpha	Protein Coding	P06280	58	GC0XM101393	6.12392	https://www.genecards.org/cgi-bin/carddisp.pl?gene=GLA
ZMIZ1	Zinc Finger MIZ-Type Containing 1	Protein Coding	Q9ULJ6	48	GC10P079068	6.10875	https://www.genecards.org/cgi-bin/carddisp.pl?gene=ZMIZ1
CD69	CD69 Molecule	Protein Coding	Q07108	51	GC12M029488	6.10348	https://www.genecards.org/cgi-bin/carddisp.pl?gene=CD69
KRT14	Keratin 14	Protein Coding	P02533	55	GC17M041582	6.10142	https://www.genecards.org/cgi-bin/carddisp.pl?gene=KRT14
FBXW7	F-Box And WD Repeat Domain Containing 7	Protein Coding	Q969H0	54	GC04M152321	6.09614	https://www.genecards.org/cgi-bin/carddisp.pl?gene=FBXW7
EPCAM	Epithelial Cell Adhesion Molecule	Protein Coding	P16422	56	GC02P047345	6.09036	https://www.genecards.org/cgi-bin/carddisp.pl?gene=EPCAM
FFAR2	Free Fatty Acid Receptor 2	Protein Coding	O15552	48	GC19P112931	6.09022	https://www.genecards.org/cgi-bin/carddisp.pl?gene=FFAR2
KLK3	Kallikrein Related Peptidase 3	Protein Coding	P07288	55	GC19P050854	6.08348	https://www.genecards.org/cgi-bin/carddisp.pl?gene=KLK3
LIF	LIF Interleukin 6 Family Cytokine	Protein Coding	P15018	53	GC22M030240	6.07409	https://www.genecards.org/cgi-bin/carddisp.pl?gene=LIF
SLCO1B1	Solute Carrier Organic Anion Transporter Family Member 1B1	Protein Coding	Q9Y6L6	55	GC12P039359	6.06754	https://www.genecards.org/cgi-bin/carddisp.pl?gene=SLCO1B1
STAT5B	Signal Transducer And Activator Of Transcription 5B	Protein Coding	P51692	58	GC17M042199	6.05978	https://www.genecards.org/cgi-bin/carddisp.pl?gene=STAT5B
MIR135A1	MicroRNA 135a-1	RNA Gene		27	GC03M053888	6.05027	https://www.genecards.org/cgi-bin/carddisp.pl?gene=MIR135A1
ANK1	Ankyrin 1	Protein Coding	P16157	54	GC08M041653	6.04848	https://www.genecards.org/cgi-bin/carddisp.pl?gene=ANK1
EGR1	Early Growth Response 1	Protein Coding	P18146	53	GC05P138465	6.04239	https://www.genecards.org/cgi-bin/carddisp.pl?gene=EGR1
FGF19	Fibroblast Growth Factor 19	Protein Coding	O95750	52	GC11M125583	6.04206	https://www.genecards.org/cgi-bin/carddisp.pl?gene=FGF19
OCA2	OCA2 Melanosomal Transmembrane Protein	Protein Coding	Q04671	53	GC15M027754	6.03707	https://www.genecards.org/cgi-bin/carddisp.pl?gene=OCA2
MIR186	MicroRNA 186	RNA Gene		27	GC01M071067	6.03553	https://www.genecards.org/cgi-bin/carddisp.pl?gene=MIR186
KCNN4	Potassium Calcium-Activated Channel Subfamily N Member 4	Protein Coding	O15554	56	GC19M092880	6.03357	https://www.genecards.org/cgi-bin/carddisp.pl?gene=KCNN4
NKX2-2	NK2 Homeobox 2	Protein Coding	O95096	49	GC20M021511	6.03279	https://www.genecards.org/cgi-bin/carddisp.pl?gene=NKX2-2
USH2A	Usherin	Protein Coding	O75445	47	GC01M215622	6.03267	https://www.genecards.org/cgi-bin/carddisp.pl?gene=USH2A
RMRP	RNA Component Of Mitochondrial RNA Processing Endoribonuclease	RNA Gene		31	GC09M035655	6.02915	https://www.genecards.org/cgi-bin/carddisp.pl?gene=RMRP
MMP10	Matrix Metallopeptidase 10	Protein Coding	P09238	52	GC11M102770	6.02496	https://www.genecards.org/cgi-bin/carddisp.pl?gene=MMP10
NFATC1	Nuclear Factor Of Activated T Cells 1	Protein Coding	O95644	56	GC18P079395	6.0173	https://www.genecards.org/cgi-bin/carddisp.pl?gene=NFATC1
EPX	Eosinophil Peroxidase	Protein Coding	P11678	53	GC17P058192	6.0168	https://www.genecards.org/cgi-bin/carddisp.pl?gene=EPX
PRKACB	Protein Kinase CAMP-Activated Catalytic Subunit Beta	Protein Coding	P22694	57	GC01P084078	6.01466	https://www.genecards.org/cgi-bin/carddisp.pl?gene=PRKACB
CD1A	CD1a Molecule	Protein Coding	P06126	48	GC01P164755	6.01189	https://www.genecards.org/cgi-bin/carddisp.pl?gene=CD1A
UBASH3A	Ubiquitin Associated And SH3 Domain Containing A	Protein Coding	P57075	47	GC21P042403	6.0113	https://www.genecards.org/cgi-bin/carddisp.pl?gene=UBASH3A
INPP5D	Inositol Polyphosphate-5-Phosphatase D	Protein Coding	Q92835	52	GC02P233059	6.00581	https://www.genecards.org/cgi-bin/carddisp.pl?gene=INPP5D
GOT2	Glutamic-Oxaloacetic Transaminase 2	Protein Coding	P00505	56	GC16M058707	5.99937	https://www.genecards.org/cgi-bin/carddisp.pl?gene=GOT2
CDKN2C	Cyclin Dependent Kinase Inhibitor 2C	Protein Coding	P42773	52	GC01P050960	5.98867	https://www.genecards.org/cgi-bin/carddisp.pl?gene=CDKN2C
CYP2C8	Cytochrome P450 Family 2 Subfamily C Member 8	Protein Coding	P10632	55	GC10M095038	5.98814	https://www.genecards.org/cgi-bin/carddisp.pl?gene=CYP2C8
PRPF31	Pre-MRNA Processing Factor 31	Protein Coding	Q8WWY3	52	GC19P113671	5.98632	https://www.genecards.org/cgi-bin/carddisp.pl?gene=PRPF31
STING1	Stimulator Of Interferon Response CGAMP Interactor 1	Protein Coding	Q86WV6	50	GC05M139492	5.98051	https://www.genecards.org/cgi-bin/carddisp.pl?gene=STING1
OXA1L	OXA1L Mitochondrial Inner Membrane Protein	Protein Coding	Q15070	46	GC14P022766	5.98015	https://www.genecards.org/cgi-bin/carddisp.pl?gene=OXA1L
TRPV4	Transient Receptor Potential Cation Channel Subfamily V Member 4	Protein Coding	Q9HBA0	57	GC12M109783	5.97494	https://www.genecards.org/cgi-bin/carddisp.pl?gene=TRPV4
CYP1B1	Cytochrome P450 Family 1 Subfamily B Member 1	Protein Coding	Q16678	56	GC02M038066	5.96589	https://www.genecards.org/cgi-bin/carddisp.pl?gene=CYP1B1
MIR497	MicroRNA 497	RNA Gene		26	GC17M074819	5.95091	https://www.genecards.org/cgi-bin/carddisp.pl?gene=MIR497
USP48	Ubiquitin Specific Peptidase 48	Protein Coding	Q86UV5	48	GC01M021678	5.9491	https://www.genecards.org/cgi-bin/carddisp.pl?gene=USP48
TMPRSS6	Transmembrane Serine Protease 6	Protein Coding	Q8IU80	53	GC22M077092	5.9487	https://www.genecards.org/cgi-bin/carddisp.pl?gene=TMPRSS6
PRKD1	Protein Kinase D1	Protein Coding	Q15139	58	GC14M029576	5.94785	https://www.genecards.org/cgi-bin/carddisp.pl?gene=PRKD1
GNAI2	G Protein Subunit Alpha I2	Protein Coding	P04899	55	GC03P050226	5.94632	https://www.genecards.org/cgi-bin/carddisp.pl?gene=GNAI2
TCF3	Transcription Factor 3	Protein Coding	P15923	54	GC19M001609	5.94362	https://www.genecards.org/cgi-bin/carddisp.pl?gene=TCF3
BSND	Barttin CLCNK Type Accessory Subunit Beta	Protein Coding	Q8WZ55	50	GC01P054998	5.94175	https://www.genecards.org/cgi-bin/carddisp.pl?gene=BSND
RUNX1	RUNX Family Transcription Factor 1	Protein Coding	Q01196	59	GC21M034787	5.94145	https://www.genecards.org/cgi-bin/carddisp.pl?gene=RUNX1
GP1BA	Glycoprotein Ib Platelet Subunit Alpha	Protein Coding	P07359	56	GC17P004932	5.9384	https://www.genecards.org/cgi-bin/carddisp.pl?gene=GP1BA
CR2	Complement C3d Receptor 2	Protein Coding	P20023	54	GC01P207454	5.93725	https://www.genecards.org/cgi-bin/carddisp.pl?gene=CR2
SCAPER	S-Phase Cyclin A Associated Protein In The ER	Protein Coding	Q9BY12	45	GC15M076347	5.93608	https://www.genecards.org/cgi-bin/carddisp.pl?gene=SCAPER
PRKACG	Protein Kinase CAMP-Activated Catalytic Subunit Gamma	Protein Coding	P22612	54	GC09M070876	5.93467	https://www.genecards.org/cgi-bin/carddisp.pl?gene=PRKACG
SLC6A14	Solute Carrier Family 6 Member 14	Protein Coding	Q9UN76	48	GC0XP116436	5.93046	https://www.genecards.org/cgi-bin/carddisp.pl?gene=SLC6A14
TNFRSF10B	TNF Receptor Superfamily Member 10b	Protein Coding	O14763	59	GC08M023020	5.9236	https://www.genecards.org/cgi-bin/carddisp.pl?gene=TNFRSF10B
KLRK1	Killer Cell Lectin Like Receptor K1	Protein Coding	P26718	50	GC12M029496	5.92176	https://www.genecards.org/cgi-bin/carddisp.pl?gene=KLRK1
EPRS1	Glutamyl-Prolyl-TRNA Synthetase 1	Protein Coding	P07814	53	GC01M219969	5.92102	https://www.genecards.org/cgi-bin/carddisp.pl?gene=EPRS1
RFC2	Replication Factor C Subunit 2	Protein Coding	P35250	51	GC07M074231	5.91911	https://www.genecards.org/cgi-bin/carddisp.pl?gene=RFC2
GTF2IRD1	GTF2I Repeat Domain Containing 1	Protein Coding	Q9UHL9	48	GC07P086263	5.91911	https://www.genecards.org/cgi-bin/carddisp.pl?gene=GTF2IRD1
DNAJC30	DnaJ Heat Shock Protein Family (Hsp40) Member C30	Protein Coding	Q96LL9	44	GC07M073680	5.91911	https://www.genecards.org/cgi-bin/carddisp.pl?gene=DNAJC30
BUD23	BUD23 RRNA Methyltransferase And Ribosome Maturation Factor	Protein Coding	O43709	43	GC07P086243	5.91911	https://www.genecards.org/cgi-bin/carddisp.pl?gene=BUD23
METTL27	Methyltransferase Like 27	Protein Coding	Q8N6F8	40	GC07M074521	5.91911	https://www.genecards.org/cgi-bin/carddisp.pl?gene=METTL27
TMEM270	Transmembrane Protein 270	Protein Coding	Q6UE05	35	GC07P086253	5.91911	https://www.genecards.org/cgi-bin/carddisp.pl?gene=TMEM270
CARD8	Caspase Recruitment Domain Family Member 8	Protein Coding	Q9Y2G2	47	GC19M093027	5.91865	https://www.genecards.org/cgi-bin/carddisp.pl?gene=CARD8
IKZF1	IKAROS Family Zinc Finger 1	Protein Coding	Q13422	57	GC07P050303	5.90934	https://www.genecards.org/cgi-bin/carddisp.pl?gene=IKZF1
FANCG	FA Complementation Group G	Protein Coding	O15287	52	GC09M035073	5.90376	https://www.genecards.org/cgi-bin/carddisp.pl?gene=FANCG
PKM	Pyruvate Kinase M1/2	Protein Coding	P14618	58	GC15M072199	5.89603	https://www.genecards.org/cgi-bin/carddisp.pl?gene=PKM
BDKRB2	Bradykinin Receptor B2	Protein Coding	P30411	53	GC14P096205	5.89419	https://www.genecards.org/cgi-bin/carddisp.pl?gene=BDKRB2
VEGFC	Vascular Endothelial Growth Factor C	Protein Coding	P49767	55	GC04M176683	5.89085	https://www.genecards.org/cgi-bin/carddisp.pl?gene=VEGFC
NOTCH4	Notch Receptor 4	Protein Coding	Q99466	55	GC06M093816	5.89073	https://www.genecards.org/cgi-bin/carddisp.pl?gene=NOTCH4
MIR361	MicroRNA 361	RNA Gene		25	GC0XM085903	5.88974	https://www.genecards.org/cgi-bin/carddisp.pl?gene=MIR361
GDNF	Glial Cell Derived Neurotrophic Factor	Protein Coding	P39905	59	GC05M037812	5.88872	https://www.genecards.org/cgi-bin/carddisp.pl?gene=GDNF
FGF1	Fibroblast Growth Factor 1	Protein Coding	P05230	56	GC05M142555	5.88832	https://www.genecards.org/cgi-bin/carddisp.pl?gene=FGF1
BCL2L1	BCL2 Like 1	Protein Coding	Q07817	57	GC20M031664	5.88631	https://www.genecards.org/cgi-bin/carddisp.pl?gene=BCL2L1
PBX2	PBX Homeobox 2	Protein Coding	P40425	47	GC06M032184	5.87682	https://www.genecards.org/cgi-bin/carddisp.pl?gene=PBX2
RECK	Reversion Inducing Cysteine Rich Protein With Kazal Motifs	Protein Coding	O95980	50	GC09P036036	5.8767	https://www.genecards.org/cgi-bin/carddisp.pl?gene=RECK
CACNA1A	Calcium Voltage-Gated Channel Subunit Alpha1 A	Protein Coding	O00555	57	GC19M013206	5.87351	https://www.genecards.org/cgi-bin/carddisp.pl?gene=CACNA1A
LRP2	LDL Receptor Related Protein 2	Protein Coding	P98164	58	GC02M169127	5.85859	https://www.genecards.org/cgi-bin/carddisp.pl?gene=LRP2
MAP2K2	Mitogen-Activated Protein Kinase Kinase 2	Protein Coding	P36507	63	GC19M004090	5.85635	https://www.genecards.org/cgi-bin/carddisp.pl?gene=MAP2K2
PARK7	Parkinsonism Associated Deglycase	Protein Coding	Q99497	56	GC01P039429	5.85466	https://www.genecards.org/cgi-bin/carddisp.pl?gene=PARK7
OGA	O-GlcNAcase	Protein Coding	O60502	48	GC10M101785	5.85411	https://www.genecards.org/cgi-bin/carddisp.pl?gene=OGA
HLA-E	Major Histocompatibility Complex, Class I, E	Protein Coding	P13747	50	GC06P134793	5.83432	https://www.genecards.org/cgi-bin/carddisp.pl?gene=HLA-E
CAST	Calpastatin	Protein Coding	P20810	56	GC05P095975	5.82506	https://www.genecards.org/cgi-bin/carddisp.pl?gene=CAST
PIK3C3	Phosphatidylinositol 3-Kinase Catalytic Subunit Type 3	Protein Coding	Q8NEB9	58	GC18P041955	5.82142	https://www.genecards.org/cgi-bin/carddisp.pl?gene=PIK3C3
BAMBI	BMP And Activin Membrane Bound Inhibitor	Protein Coding	Q13145	52	GC10P028974	5.81764	https://www.genecards.org/cgi-bin/carddisp.pl?gene=BAMBI
ORMDL3	ORMDL Sphingolipid Biosynthesis Regulator 3	Protein Coding	Q8N138	46	GC17M039921	5.81732	https://www.genecards.org/cgi-bin/carddisp.pl?gene=ORMDL3
REEP6	Receptor Accessory Protein 6	Protein Coding	Q96HR9	47	GC19P001491	5.81693	https://www.genecards.org/cgi-bin/carddisp.pl?gene=REEP6
CRNDE	Colorectal Neoplasia Differentially Expressed	RNA Gene		28	GC16M054962	5.80267	https://www.genecards.org/cgi-bin/carddisp.pl?gene=CRNDE
PI4KA	Phosphatidylinositol 4-Kinase Alpha	Protein Coding	P42356	56	GC22M020707	5.79823	https://www.genecards.org/cgi-bin/carddisp.pl?gene=PI4KA
PTHLH	Parathyroid Hormone Like Hormone	Protein Coding	P12272	55	GC12M029767	5.79795	https://www.genecards.org/cgi-bin/carddisp.pl?gene=PTHLH
MIR95	MicroRNA 95	RNA Gene		25	GC04M008013	5.7969	https://www.genecards.org/cgi-bin/carddisp.pl?gene=MIR95
RNASEH2B	Ribonuclease H2 Subunit B	Protein Coding	Q5TBB1	46	GC13P050909	5.79674	https://www.genecards.org/cgi-bin/carddisp.pl?gene=RNASEH2B
ADCYAP1	Adenylate Cyclase Activating Polypeptide 1	Protein Coding	P18509	51	GC18P000895	5.79345	https://www.genecards.org/cgi-bin/carddisp.pl?gene=ADCYAP1
AQP5	Aquaporin 5	Protein Coding	P55064	56	GC12P049961	5.79205	https://www.genecards.org/cgi-bin/carddisp.pl?gene=AQP5
LAMB1	Laminin Subunit Beta 1	Protein Coding	P07942	58	GC07M107923	5.79047	https://www.genecards.org/cgi-bin/carddisp.pl?gene=LAMB1
KLF4	KLF Transcription Factor 4	Protein Coding	O43474	55	GC09M107484	5.78836	https://www.genecards.org/cgi-bin/carddisp.pl?gene=KLF4
CACNA1D	Calcium Voltage-Gated Channel Subunit Alpha1 D	Protein Coding	Q01668	56	GC03P053328	5.78472	https://www.genecards.org/cgi-bin/carddisp.pl?gene=CACNA1D
CDH5	Cadherin 5	Protein Coding	P33151	55	GC16P066366	5.7831	https://www.genecards.org/cgi-bin/carddisp.pl?gene=CDH5
LRAT	Lecithin Retinol Acyltransferase	Protein Coding	O95237	53	GC04P154626	5.7748	https://www.genecards.org/cgi-bin/carddisp.pl?gene=LRAT
MYB	MYB Proto-Oncogene, Transcription Factor	Protein Coding	P10242	56	GC06P135181	5.77081	https://www.genecards.org/cgi-bin/carddisp.pl?gene=MYB
MIR92B	MicroRNA 92b	RNA Gene		24	GC01P155195	5.77061	https://www.genecards.org/cgi-bin/carddisp.pl?gene=MIR92B
IL18RAP	Interleukin 18 Receptor Accessory Protein	Protein Coding	O95256	46	GC02P102418	5.76988	https://www.genecards.org/cgi-bin/carddisp.pl?gene=IL18RAP
CFLAR	CASP8 And FADD Like Apoptosis Regulator	Protein Coding	O15519	53	GC02P201527	5.76501	https://www.genecards.org/cgi-bin/carddisp.pl?gene=CFLAR
MDM2	MDM2 Proto-Oncogene	Protein Coding	Q00987	62	GC12P068808	5.76211	https://www.genecards.org/cgi-bin/carddisp.pl?gene=MDM2
MIR92A2	MicroRNA 92a-2	RNA Gene		22	GC0XM134449	5.76028	https://www.genecards.org/cgi-bin/carddisp.pl?gene=MIR92A2
IL21R	Interleukin 21 Receptor	Protein Coding	Q9HBE5	51	GC16P081252	5.75509	https://www.genecards.org/cgi-bin/carddisp.pl?gene=IL21R
P2RX7	Purinergic Receptor P2X 7	Protein Coding	Q99572	55	GC12P133258	5.74996	https://www.genecards.org/cgi-bin/carddisp.pl?gene=P2RX7
COX5A	Cytochrome C Oxidase Subunit 5A	Protein Coding	P20674	53	GC15M074919	5.74418	https://www.genecards.org/cgi-bin/carddisp.pl?gene=COX5A
AMACR	Alpha-Methylacyl-CoA Racemase	Protein Coding	Q9UHK6	54	GC05M033986	5.74248	https://www.genecards.org/cgi-bin/carddisp.pl?gene=AMACR
TOM1	Target Of Myb1 Membrane Trafficking Protein	Protein Coding	O60784	50	GC22P035299	5.74124	https://www.genecards.org/cgi-bin/carddisp.pl?gene=TOM1
MUC6	Mucin 6, Oligomeric Mucus/Gel-Forming	Protein Coding	Q6W4X9	48	GC11M001012	5.72203	https://www.genecards.org/cgi-bin/carddisp.pl?gene=MUC6
DDIT3	DNA Damage Inducible Transcript 3	Protein Coding	P35638	55	GC12M057516	5.72121	https://www.genecards.org/cgi-bin/carddisp.pl?gene=DDIT3
IGFBP4	Insulin Like Growth Factor Binding Protein 4	Protein Coding	P22692	52	GC17P040443	5.71686	https://www.genecards.org/cgi-bin/carddisp.pl?gene=IGFBP4
DOCK8	Dedicator Of Cytokinesis 8	Protein Coding	Q8NF50	54	GC09P000267	5.70494	https://www.genecards.org/cgi-bin/carddisp.pl?gene=DOCK8
NUCB2	Nucleobindin 2	Protein Coding	P80303	46	GC11P017901	5.70454	https://www.genecards.org/cgi-bin/carddisp.pl?gene=NUCB2
HBEGF	Heparin Binding EGF Like Growth Factor	Protein Coding	Q99075	53	GC05M140332	5.70428	https://www.genecards.org/cgi-bin/carddisp.pl?gene=HBEGF
FANCE	FA Complementation Group E	Protein Coding	Q9HB96	51	GC06P134967	5.70082	https://www.genecards.org/cgi-bin/carddisp.pl?gene=FANCE
PASK	PAS Domain Containing Serine/Threonine Kinase	Protein Coding	Q96RG2	49	GC02M241106	5.69776	https://www.genecards.org/cgi-bin/carddisp.pl?gene=PASK
PLIN2	Perilipin 2	Protein Coding	Q99541	50	GC09M019270	5.68097	https://www.genecards.org/cgi-bin/carddisp.pl?gene=PLIN2
IL12RB2	Interleukin 12 Receptor Subunit Beta 2	Protein Coding	Q99665	52	GC01P067307	5.67192	https://www.genecards.org/cgi-bin/carddisp.pl?gene=IL12RB2
CRB1	Crumbs Cell Polarity Complex Component 1	Protein Coding	P82279	51	GC01P197208	5.67189	https://www.genecards.org/cgi-bin/carddisp.pl?gene=CRB1
SLC22A3	Solute Carrier Family 22 Member 3	Protein Coding	O75751	51	GC06P160348	5.66301	https://www.genecards.org/cgi-bin/carddisp.pl?gene=SLC22A3
CTH	Cystathionine Gamma-Lyase	Protein Coding	P32929	56	GC01P070411	5.66224	https://www.genecards.org/cgi-bin/carddisp.pl?gene=CTH
LAMC2	Laminin Subunit Gamma 2	Protein Coding	Q13753	55	GC01P183186	5.66224	https://www.genecards.org/cgi-bin/carddisp.pl?gene=LAMC2
KIF11	Kinesin Family Member 11	Protein Coding	P52732	56	GC10P092574	5.66121	https://www.genecards.org/cgi-bin/carddisp.pl?gene=KIF11
KRT8	Keratin 8	Protein Coding	P05787	55	GC12M052897	5.66076	https://www.genecards.org/cgi-bin/carddisp.pl?gene=KRT8
LOC126860303	CDK7 Strongly-Dependent Group 2 Enhancer GRCh37_chr8:11407118-11408317	Functional Element		8	GC08P011549	5.65763	https://www.genecards.org/cgi-bin/carddisp.pl?gene=LOC126860303
FAS-AS1	FAS Antisense RNA 1	RNA Gene		21	GC10M088991	5.63813	https://www.genecards.org/cgi-bin/carddisp.pl?gene=FAS-AS1
MASP2	MBL Associated Serine Protease 2	Protein Coding	O00187	54	GC01M014494	5.6373	https://www.genecards.org/cgi-bin/carddisp.pl?gene=MASP2
PRPF8	Pre-MRNA Processing Factor 8	Protein Coding	Q6P2Q9	50	GC17M001650	5.62938	https://www.genecards.org/cgi-bin/carddisp.pl?gene=PRPF8
TNIP1	TNFAIP3 Interacting Protein 1	Protein Coding	Q15025	47	GC05M151029	5.62689	https://www.genecards.org/cgi-bin/carddisp.pl?gene=TNIP1
LOC111674472	DNase I Hypersensitive Sites In Introns 16 And 17a Of CFTR	Functional Element		9	GC07P117607	5.62508	https://www.genecards.org/cgi-bin/carddisp.pl?gene=LOC111674472
WDR11	WD Repeat Domain 11	Protein Coding	Q9BZH6	47	GC10P120851	5.61907	https://www.genecards.org/cgi-bin/carddisp.pl?gene=WDR11
MIR517A	MicroRNA 517a	RNA Gene		22	GC19P053712	5.60933	https://www.genecards.org/cgi-bin/carddisp.pl?gene=MIR517A
CHKB-CPT1B	CHKB-CPT1B Readthrough (NMD Candidate)	RNA Gene		23	GC22M050568	5.60603	https://www.genecards.org/cgi-bin/carddisp.pl?gene=CHKB-CPT1B
MIR29B1	MicroRNA 29b-1	RNA Gene		28	GC07M130877	5.60179	https://www.genecards.org/cgi-bin/carddisp.pl?gene=MIR29B1
MTRR	5-Methyltetrahydrofolate-Homocysteine Methyltransferase Reductase	Protein Coding	Q9UBK8	53	GC05P007851	5.59268	https://www.genecards.org/cgi-bin/carddisp.pl?gene=MTRR
SNHG14	Small Nucleolar RNA Host Gene 14	RNA Gene		24	GC15P156537	5.58903	https://www.genecards.org/cgi-bin/carddisp.pl?gene=SNHG14
MIR185	MicroRNA 185	RNA Gene		29	GC22P069932	5.58862	https://www.genecards.org/cgi-bin/carddisp.pl?gene=MIR185
TAT	Tyrosine Aminotransferase	Protein Coding	P17735	54	GC16M071565	5.58449	https://www.genecards.org/cgi-bin/carddisp.pl?gene=TAT
OXTR	Oxytocin Receptor	Protein Coding	P30559	56	GC03M008767	5.58281	https://www.genecards.org/cgi-bin/carddisp.pl?gene=OXTR
MIR181B1	MicroRNA 181b-1	RNA Gene		27	GC01M198858	5.58128	https://www.genecards.org/cgi-bin/carddisp.pl?gene=MIR181B1
ABCB4	ATP Binding Cassette Subfamily B Member 4	Protein Coding	P21439	55	GC07M087365	5.58121	https://www.genecards.org/cgi-bin/carddisp.pl?gene=ABCB4
FCGR2B	Fc Gamma Receptor IIb	Protein Coding	P31994	56	GC01P164915	5.57515	https://www.genecards.org/cgi-bin/carddisp.pl?gene=FCGR2B
CKB	Creatine Kinase B	Protein Coding	P12277	54	GC14M103519	5.57021	https://www.genecards.org/cgi-bin/carddisp.pl?gene=CKB
RNASEH2A	Ribonuclease H2 Subunit A	Protein Coding	O75792	52	GC19P112449	5.56871	https://www.genecards.org/cgi-bin/carddisp.pl?gene=RNASEH2A
MIR188	MicroRNA 188	RNA Gene		24	GC0XP050003	5.55445	https://www.genecards.org/cgi-bin/carddisp.pl?gene=MIR188
SIAE	Sialic Acid Acetylesterase	Protein Coding	Q9HAT2	47	GC11M124633	5.54694	https://www.genecards.org/cgi-bin/carddisp.pl?gene=SIAE
ACOX1	Acyl-CoA Oxidase 1	Protein Coding	Q15067	54	GC17M075941	5.54456	https://www.genecards.org/cgi-bin/carddisp.pl?gene=ACOX1
KRT10	Keratin 10	Protein Coding	P13645	52	GC17M040818	5.54363	https://www.genecards.org/cgi-bin/carddisp.pl?gene=KRT10
DCLRE1C	DNA Cross-Link Repair 1C	Protein Coding	Q96SD1	53	GC10M014897	5.53813	https://www.genecards.org/cgi-bin/carddisp.pl?gene=DCLRE1C
SLC29A1	Solute Carrier Family 29 Member 1 (Augustine Blood Group)	Protein Coding	Q99808	56	GC06P044219	5.53694	https://www.genecards.org/cgi-bin/carddisp.pl?gene=SLC29A1
SBDS	SBDS Ribosome Maturation Factor	Protein Coding	Q9Y3A5	52	GC07M066987	5.53039	https://www.genecards.org/cgi-bin/carddisp.pl?gene=SBDS
MIR196A2	MicroRNA 196a-2	RNA Gene		29	GC12P060518	5.52812	https://www.genecards.org/cgi-bin/carddisp.pl?gene=MIR196A2
TGFB3	Transforming Growth Factor Beta 3	Protein Coding	P10600	56	GC14M075958	5.52703	https://www.genecards.org/cgi-bin/carddisp.pl?gene=TGFB3
ITCH	Itchy E3 Ubiquitin Protein Ligase	Protein Coding	Q96J02	55	GC20P034363	5.52526	https://www.genecards.org/cgi-bin/carddisp.pl?gene=ITCH
SLC25A4	Solute Carrier Family 25 Member 4	Protein Coding	P12235	58	GC04P185143	5.51529	https://www.genecards.org/cgi-bin/carddisp.pl?gene=SLC25A4
ADAM17	ADAM Metallopeptidase Domain 17	Protein Coding	P78536	59	GC02M009488	5.50874	https://www.genecards.org/cgi-bin/carddisp.pl?gene=ADAM17
ANXA1	Annexin A1	Protein Coding	P04083	55	GC09P073151	5.49812	https://www.genecards.org/cgi-bin/carddisp.pl?gene=ANXA1
RAG1	Recombination Activating 1	Protein Coding	P15918	53	GC11P036554	5.49713	https://www.genecards.org/cgi-bin/carddisp.pl?gene=RAG1
KLKB1	Kallikrein B1	Protein Coding	P03952	53	GC04P186348	5.49652	https://www.genecards.org/cgi-bin/carddisp.pl?gene=KLKB1
VASP	Vasodilator Stimulated Phosphoprotein	Protein Coding	P50552	51	GC19P113266	5.49299	https://www.genecards.org/cgi-bin/carddisp.pl?gene=VASP
RETNLB	Resistin Like Beta	Protein Coding	Q9BQ08	41	GC03M108743	5.49166	https://www.genecards.org/cgi-bin/carddisp.pl?gene=RETNLB
EIF2S1	Eukaryotic Translation Initiation Factor 2 Subunit Alpha	Protein Coding	P05198	54	GC14P067359	5.48718	https://www.genecards.org/cgi-bin/carddisp.pl?gene=EIF2S1
MIR383	MicroRNA 383	RNA Gene		21	GC08M014853	5.48385	https://www.genecards.org/cgi-bin/carddisp.pl?gene=MIR383
CORIN	Corin, Serine Peptidase	Protein Coding	Q9Y5Q5	53	GC04M047596	5.48234	https://www.genecards.org/cgi-bin/carddisp.pl?gene=CORIN
XIAP	X-Linked Inhibitor Of Apoptosis	Protein Coding	P98170	60	GC0XP123859	5.47714	https://www.genecards.org/cgi-bin/carddisp.pl?gene=XIAP
HLA-DRB9	Major Histocompatibility Complex, Class II, DR Beta 9 (Pseudogene)	Pseudogene		13	GC06M093828	5.47706	https://www.genecards.org/cgi-bin/carddisp.pl?gene=HLA-DRB9
FBL	Fibrillarin	Protein Coding	P22087	51	GC19M039834	5.47221	https://www.genecards.org/cgi-bin/carddisp.pl?gene=FBL
LTB	Lymphotoxin Beta	Protein Coding	Q06643	48	GC06M093785	5.46449	https://www.genecards.org/cgi-bin/carddisp.pl?gene=LTB
DANCR	Differentiation Antagonizing Non-Protein Coding RNA	RNA Gene	P0C864	30	GC04P052712	5.46446	https://www.genecards.org/cgi-bin/carddisp.pl?gene=DANCR
FTH1	Ferritin Heavy Chain 1	Protein Coding	P02794	58	GC11M061959	5.46177	https://www.genecards.org/cgi-bin/carddisp.pl?gene=FTH1
LBR	Lamin B Receptor	Protein Coding	Q14739	55	GC01M225401	5.46002	https://www.genecards.org/cgi-bin/carddisp.pl?gene=LBR
DLC1	DLC1 Rho GTPase Activating Protein	Protein Coding	Q96QB1	52	GC08M013083	5.45533	https://www.genecards.org/cgi-bin/carddisp.pl?gene=DLC1
RAD50	RAD50 Double Strand Break Repair Protein	Protein Coding	Q92878	58	GC05P132556	5.45379	https://www.genecards.org/cgi-bin/carddisp.pl?gene=RAD50
GP2	Glycoprotein 2	Protein Coding	P55259	47	GC16M020309	5.44876	https://www.genecards.org/cgi-bin/carddisp.pl?gene=GP2
ERBB4	Erb-B2 Receptor Tyrosine Kinase 4	Protein Coding	Q15303	63	GC02M211375	5.44433	https://www.genecards.org/cgi-bin/carddisp.pl?gene=ERBB4
COL4A1	Collagen Type IV Alpha 1 Chain	Protein Coding	P02462	56	GC13M110148	5.43751	https://www.genecards.org/cgi-bin/carddisp.pl?gene=COL4A1
UGT1A6	UDP Glucuronosyltransferase Family 1 Member A6	Protein Coding	P19224	51	GC02P233691	5.42259	https://www.genecards.org/cgi-bin/carddisp.pl?gene=UGT1A6
GPX4	Glutathione Peroxidase 4	Protein Coding	P36969	56	GC19P001103	5.42259	https://www.genecards.org/cgi-bin/carddisp.pl?gene=GPX4
PRF1	Perforin 1	Protein Coding	P14222	55	GC10M070597	5.42083	https://www.genecards.org/cgi-bin/carddisp.pl?gene=PRF1
ANXA2	Annexin A2	Protein Coding	P07355	56	GC15M060347	5.41499	https://www.genecards.org/cgi-bin/carddisp.pl?gene=ANXA2
NKX2-5	NK2 Homeobox 5	Protein Coding	P52952	54	GC05M173232	5.41156	https://www.genecards.org/cgi-bin/carddisp.pl?gene=NKX2-5
AFAP1-AS1	AFAP1 Antisense RNA 1	RNA Gene		25	GC04P007803	5.40654	https://www.genecards.org/cgi-bin/carddisp.pl?gene=AFAP1-AS1
MIR103A2	MicroRNA 103a-2	RNA Gene		24	GC20P003917	5.39802	https://www.genecards.org/cgi-bin/carddisp.pl?gene=MIR103A2
RAF1	Raf-1 Proto-Oncogene, Serine/Threonine Kinase	Protein Coding	P04049	63	GC03M012583	5.39647	https://www.genecards.org/cgi-bin/carddisp.pl?gene=RAF1
SLC19A3	Solute Carrier Family 19 Member 3	Protein Coding	Q9BZV2	54	GC02M227685	5.3871	https://www.genecards.org/cgi-bin/carddisp.pl?gene=SLC19A3
TCN2	Transcobalamin 2	Protein Coding	P20062	52	GC22P070335	5.38659	https://www.genecards.org/cgi-bin/carddisp.pl?gene=TCN2
LAMA3	Laminin Subunit Alpha 3	Protein Coding	Q16787	52	GC18P023689	5.37986	https://www.genecards.org/cgi-bin/carddisp.pl?gene=LAMA3
AQP3	Aquaporin 3 (Gill Blood Group)	Protein Coding	Q92482	53	GC09M033431	5.37648	https://www.genecards.org/cgi-bin/carddisp.pl?gene=AQP3
TAPBP	TAP Binding Protein	Protein Coding	O15533	51	GC06M033299	5.37421	https://www.genecards.org/cgi-bin/carddisp.pl?gene=TAPBP
TRPM6	Transient Receptor Potential Cation Channel Subfamily M Member 6	Protein Coding	Q9BX84	53	GC09M074725	5.36676	https://www.genecards.org/cgi-bin/carddisp.pl?gene=TRPM6
MUTYH	MutY DNA Glycosylase	Protein Coding	Q9UIF7	53	GC01M045329	5.35933	https://www.genecards.org/cgi-bin/carddisp.pl?gene=MUTYH
ENO1	Enolase 1	Protein Coding	P06733	56	GC01M008861	5.35904	https://www.genecards.org/cgi-bin/carddisp.pl?gene=ENO1
SFTPD	Surfactant Protein D	Protein Coding	P35247	53	GC10M079937	5.35359	https://www.genecards.org/cgi-bin/carddisp.pl?gene=SFTPD
PDE4A	Phosphodiesterase 4A	Protein Coding	P27815	54	GC19P010416	5.35293	https://www.genecards.org/cgi-bin/carddisp.pl?gene=PDE4A
MIR382	MicroRNA 382	RNA Gene		24	GC14P116761	5.3525	https://www.genecards.org/cgi-bin/carddisp.pl?gene=MIR382
CHUK	Component Of Inhibitor Of Nuclear Factor Kappa B Kinase Complex	Protein Coding	O15111	59	GC10M100415	5.34374	https://www.genecards.org/cgi-bin/carddisp.pl?gene=CHUK
EYS	Eyes Shut Homolog	Protein Coding	Q5T1H1	43	GC06M063719	5.34207	https://www.genecards.org/cgi-bin/carddisp.pl?gene=EYS
YAP1	Yes1 Associated Transcriptional Regulator	Protein Coding	P46937	56	GC11P102110	5.33822	https://www.genecards.org/cgi-bin/carddisp.pl?gene=YAP1
LIG4	DNA Ligase 4	Protein Coding	P49917	56	GC13M108207	5.33439	https://www.genecards.org/cgi-bin/carddisp.pl?gene=LIG4
ITGA2B	Integrin Subunit Alpha 2b	Protein Coding	P08514	60	GC17M077853	5.33161	https://www.genecards.org/cgi-bin/carddisp.pl?gene=ITGA2B
NAT1	N-Acetyltransferase 1	Protein Coding	P18440	53	GC08P018183	5.33075	https://www.genecards.org/cgi-bin/carddisp.pl?gene=NAT1
DNMT3A	DNA Methyltransferase 3 Alpha	Protein Coding	Q9Y6K1	60	GC02M025228	5.32844	https://www.genecards.org/cgi-bin/carddisp.pl?gene=DNMT3A
CEACAM3	CEA Cell Adhesion Molecule 3	Protein Coding	P40198	51	GC19P041796	5.32366	https://www.genecards.org/cgi-bin/carddisp.pl?gene=CEACAM3
CA2	Carbonic Anhydrase 2	Protein Coding	P00918	59	GC08P085463	5.31565	https://www.genecards.org/cgi-bin/carddisp.pl?gene=CA2
ELAVL1	ELAV Like RNA Binding Protein 1	Protein Coding	Q15717	50	GC19M007958	5.29639	https://www.genecards.org/cgi-bin/carddisp.pl?gene=ELAVL1
ITGAX	Integrin Subunit Alpha X	Protein Coding	P20702	54	GC16P081726	5.28908	https://www.genecards.org/cgi-bin/carddisp.pl?gene=ITGAX
NRIP1	Nuclear Receptor Interacting Protein 1	Protein Coding	P48552	53	GC21M014961	5.28091	https://www.genecards.org/cgi-bin/carddisp.pl?gene=NRIP1
PTGER3	Prostaglandin E Receptor 3	Protein Coding	P43115	53	GC01M070852	5.27988	https://www.genecards.org/cgi-bin/carddisp.pl?gene=PTGER3
COL2A1	Collagen Type II Alpha 1 Chain	Protein Coding	P02458	58	GC12M047972	5.27963	https://www.genecards.org/cgi-bin/carddisp.pl?gene=COL2A1
ACTB	Actin Beta	Protein Coding	P60709	58	GC07M005527	5.27414	https://www.genecards.org/cgi-bin/carddisp.pl?gene=ACTB
EPHX2	Epoxide Hydrolase 2	Protein Coding	P34913	55	GC08P027490	5.2721	https://www.genecards.org/cgi-bin/carddisp.pl?gene=EPHX2
RB1	RB Transcriptional Corepressor 1	Protein Coding	P06400	57	GC13P048303	5.26484	https://www.genecards.org/cgi-bin/carddisp.pl?gene=RB1
BLTP1	Bridge-Like Lipid Transfer Protein Family Member 1	Protein Coding	Q2LD37	41	GC04P122154	5.26241	https://www.genecards.org/cgi-bin/carddisp.pl?gene=BLTP1
SERPINA4	Serpin Family A Member 4	Protein Coding	P29622	48	GC14P094561	5.25783	https://www.genecards.org/cgi-bin/carddisp.pl?gene=SERPINA4
MMP12	Matrix Metallopeptidase 12	Protein Coding	P39900	55	GC11M102862	5.24865	https://www.genecards.org/cgi-bin/carddisp.pl?gene=MMP12
FHIT	Fragile Histidine Triad Diadenosine Triphosphatase	Protein Coding	P49789	52	GC03M059747	5.2431	https://www.genecards.org/cgi-bin/carddisp.pl?gene=FHIT
SPARC	Secreted Protein Acidic And Cysteine Rich	Protein Coding	P09486	58	GC05M151661	5.2374	https://www.genecards.org/cgi-bin/carddisp.pl?gene=SPARC
IL3	Interleukin 3	Protein Coding	P08700	54	GC05P132060	5.23665	https://www.genecards.org/cgi-bin/carddisp.pl?gene=IL3
SOX9	SRY-Box Transcription Factor 9	Protein Coding	P48436	54	GC17P072121	5.23662	https://www.genecards.org/cgi-bin/carddisp.pl?gene=SOX9
F12	Coagulation Factor XII	Protein Coding	P00748	56	GC05M177402	5.23538	https://www.genecards.org/cgi-bin/carddisp.pl?gene=F12
KRT19	Keratin 19	Protein Coding	P08727	53	GC17M041523	5.22724	https://www.genecards.org/cgi-bin/carddisp.pl?gene=KRT19
RORC	RAR Related Orphan Receptor C	Protein Coding	P51449	52	GC01M151806	5.22211	https://www.genecards.org/cgi-bin/carddisp.pl?gene=RORC
AQP4	Aquaporin 4	Protein Coding	P55087	54	GC18M026852	5.22188	https://www.genecards.org/cgi-bin/carddisp.pl?gene=AQP4
IL7	Interleukin 7	Protein Coding	P13232	52	GC08M078689	5.22183	https://www.genecards.org/cgi-bin/carddisp.pl?gene=IL7
FFAR4	Free Fatty Acid Receptor 4	Protein Coding	Q5NUL3	46	GC10P093566	5.21955	https://www.genecards.org/cgi-bin/carddisp.pl?gene=FFAR4
TRIM21	Tripartite Motif Containing 21	Protein Coding	P19474	52	GC11M004384	5.20802	https://www.genecards.org/cgi-bin/carddisp.pl?gene=TRIM21
APEX1	Apurinic/Apyrimidinic Endodeoxyribonuclease 1	Protein Coding	P27695	54	GC14P020455	5.20729	https://www.genecards.org/cgi-bin/carddisp.pl?gene=APEX1
CEACAM5	CEA Cell Adhesion Molecule 5	Protein Coding	P06731	52	GC19P113136	5.19475	https://www.genecards.org/cgi-bin/carddisp.pl?gene=CEACAM5
MIR181D	MicroRNA 181d	RNA Gene		26	GC19P013874	5.19266	https://www.genecards.org/cgi-bin/carddisp.pl?gene=MIR181D
CALR	Calreticulin	Protein Coding	P27797	60	GC19P012938	5.19261	https://www.genecards.org/cgi-bin/carddisp.pl?gene=CALR
ZNF408	Zinc Finger Protein 408	Protein Coding	Q9H9D4	44	GC11P046701	5.18781	https://www.genecards.org/cgi-bin/carddisp.pl?gene=ZNF408
KCTD1	Potassium Channel Tetramerization Domain Containing 1	Protein Coding	Q719H9	47	GC18M026454	5.18413	https://www.genecards.org/cgi-bin/carddisp.pl?gene=KCTD1
AKT3	AKT Serine/Threonine Kinase 3	Protein Coding	Q9Y243	63	GC01M243488	5.18397	https://www.genecards.org/cgi-bin/carddisp.pl?gene=AKT3
HEIH	Hepatocellular Carcinoma Up-Regulated EZH2-Associated Long Non-Coding RNA	RNA Gene		21	GC05M182579	5.17455	https://www.genecards.org/cgi-bin/carddisp.pl?gene=HEIH
CANX	Calnexin	Protein Coding	P27824	54	GC05P179678	5.15775	https://www.genecards.org/cgi-bin/carddisp.pl?gene=CANX
IDO1	Indoleamine 2,3-Dioxygenase 1	Protein Coding	P14902	55	GC08P040225	5.14956	https://www.genecards.org/cgi-bin/carddisp.pl?gene=IDO1
AQP1	Aquaporin 1 (Colton Blood Group)	Protein Coding	P29972	56	GC07P030911	5.14663	https://www.genecards.org/cgi-bin/carddisp.pl?gene=AQP1
GPSM3	G Protein Signaling Modulator 3	Protein Coding	Q9Y4H4	41	GC06M093815	5.14613	https://www.genecards.org/cgi-bin/carddisp.pl?gene=GPSM3
FADD	Fas Associated Via Death Domain	Protein Coding	Q13158	54	GC11P070203	5.14078	https://www.genecards.org/cgi-bin/carddisp.pl?gene=FADD
PDE8B	Phosphodiesterase 8B	Protein Coding	O95263	54	GC05P077946	5.13746	https://www.genecards.org/cgi-bin/carddisp.pl?gene=PDE8B
LINC00673	Long Intergenic Non-Protein Coding RNA 673	RNA Gene		22	GC17M072290	5.13467	https://www.genecards.org/cgi-bin/carddisp.pl?gene=LINC00673
CUBN	Cubilin	Protein Coding	O60494	54	GC10M016824	5.12505	https://www.genecards.org/cgi-bin/carddisp.pl?gene=CUBN
ECM1	Extracellular Matrix Protein 1	Protein Coding	Q16610	53	GC01P150508	5.12348	https://www.genecards.org/cgi-bin/carddisp.pl?gene=ECM1
MIR4435-2HG	MIR4435-2 Host Gene	RNA Gene		24	GC02M112967	5.12067	https://www.genecards.org/cgi-bin/carddisp.pl?gene=MIR4435-2HG
PPIG	Peptidylprolyl Isomerase G	Protein Coding	Q13427	50	GC02P169584	5.11912	https://www.genecards.org/cgi-bin/carddisp.pl?gene=PPIG
MIR34B	MicroRNA 34b	RNA Gene		28	GC11P112476	5.1032	https://www.genecards.org/cgi-bin/carddisp.pl?gene=MIR34B
SNHG1	Small Nucleolar RNA Host Gene 1	RNA Gene		28	GC11M125254	5.10127	https://www.genecards.org/cgi-bin/carddisp.pl?gene=SNHG1
USB1	U6 SnRNA Biogenesis Phosphodiesterase 1	Protein Coding	Q9BQ65	42	GC16P057999	5.10023	https://www.genecards.org/cgi-bin/carddisp.pl?gene=USB1
SLIT2	Slit Guidance Ligand 2	Protein Coding	O94813	53	GC04P024736	5.09989	https://www.genecards.org/cgi-bin/carddisp.pl?gene=SLIT2
CTNS	Cystinosin, Lysosomal Cystine Transporter	Protein Coding	O60931	53	GC17P003636	5.09972	https://www.genecards.org/cgi-bin/carddisp.pl?gene=CTNS
TMEM126A	Transmembrane Protein 126A	Protein Coding	Q9H061	48	GC11P085647	5.0985	https://www.genecards.org/cgi-bin/carddisp.pl?gene=TMEM126A
MIR7-3	MicroRNA 7-3	RNA Gene		23	GC19P004770	5.08974	https://www.genecards.org/cgi-bin/carddisp.pl?gene=MIR7-3
R3HDML-AS1	R3HDML Antisense RNA 1	RNA Gene		15	GC20M044349	5.08661	https://www.genecards.org/cgi-bin/carddisp.pl?gene=R3HDML-AS1
SLC2A10	Solute Carrier Family 2 Member 10	Protein Coding	O95528	52	GC20P046709	5.08598	https://www.genecards.org/cgi-bin/carddisp.pl?gene=SLC2A10
ACO1	Aconitase 1	Protein Coding	P21399	52	GC09P032374	5.0786	https://www.genecards.org/cgi-bin/carddisp.pl?gene=ACO1
LRRC56	Leucine Rich Repeat Containing 56	Protein Coding	Q8IYG6	45	GC11P010580	5.07045	https://www.genecards.org/cgi-bin/carddisp.pl?gene=LRRC56
CBR3-AS1	CBR3 Antisense RNA 1	RNA Gene		25	GC21M036090	5.06974	https://www.genecards.org/cgi-bin/carddisp.pl?gene=CBR3-AS1
DNM1L	Dynamin 1 Like	Protein Coding	O00429	57	GC12P032679	5.0675	https://www.genecards.org/cgi-bin/carddisp.pl?gene=DNM1L
TNXB	Tenascin XB	Protein Coding	P22105	52	GC06M093808	5.06206	https://www.genecards.org/cgi-bin/carddisp.pl?gene=TNXB
NLRP12	NLR Family Pyrin Domain Containing 12	Protein Coding	P59046	52	GC19M053793	5.05444	https://www.genecards.org/cgi-bin/carddisp.pl?gene=NLRP12
L1CAM	L1 Cell Adhesion Molecule	Protein Coding	P32004	56	GC0XM153864	5.04731	https://www.genecards.org/cgi-bin/carddisp.pl?gene=L1CAM
MIR429	MicroRNA 429	RNA Gene		27	GC01P020466	5.04243	https://www.genecards.org/cgi-bin/carddisp.pl?gene=MIR429
MIR20B	MicroRNA 20b	RNA Gene		20	GC0XM134451	5.04212	https://www.genecards.org/cgi-bin/carddisp.pl?gene=MIR20B
HPGD	15-Hydroxyprostaglandin Dehydrogenase	Protein Coding	P15428	55	GC04M174490	5.04017	https://www.genecards.org/cgi-bin/carddisp.pl?gene=HPGD
OTUD3	OTU Deubiquitinase 3	Protein Coding	Q5T2D3	38	GC01P041143	5.04011	https://www.genecards.org/cgi-bin/carddisp.pl?gene=OTUD3
NR5A2	Nuclear Receptor Subfamily 5 Group A Member 2	Protein Coding	O00482	52	GC01P199996	5.03965	https://www.genecards.org/cgi-bin/carddisp.pl?gene=NR5A2
REG3A	Regenerating Family Member 3 Alpha	Protein Coding	Q06141	46	GC02M079157	5.03829	https://www.genecards.org/cgi-bin/carddisp.pl?gene=REG3A
GRB2	Growth Factor Receptor Bound Protein 2	Protein Coding	P62993	55	GC17M075318	5.03813	https://www.genecards.org/cgi-bin/carddisp.pl?gene=GRB2
CLIC1	Chloride Intracellular Channel 1	Protein Coding	O00299	51	GC06M093794	5.03453	https://www.genecards.org/cgi-bin/carddisp.pl?gene=CLIC1
CTNNA1	Catenin Alpha 1	Protein Coding	P35221	55	GC05P138682	5.027	https://www.genecards.org/cgi-bin/carddisp.pl?gene=CTNNA1
NES	Nestin	Protein Coding	P48681	50	GC01M156668	5.0231	https://www.genecards.org/cgi-bin/carddisp.pl?gene=NES
AQP12A	Aquaporin 12A	Protein Coding	Q8IXF9	38	GC02P240691	5.02187	https://www.genecards.org/cgi-bin/carddisp.pl?gene=AQP12A
IL11	Interleukin 11	Protein Coding	P20809	50	GC19M055364	5.01422	https://www.genecards.org/cgi-bin/carddisp.pl?gene=IL11
PROCR	Protein C Receptor	Protein Coding	Q9UNN8	51	GC20P035171	5.00978	https://www.genecards.org/cgi-bin/carddisp.pl?gene=PROCR
ZEB1	Zinc Finger E-Box Binding Homeobox 1	Protein Coding	P37275	57	GC10P031318	5.00834	https://www.genecards.org/cgi-bin/carddisp.pl?gene=ZEB1
SLPI	Secretory Leukocyte Peptidase Inhibitor	Protein Coding	P03973	50	GC20M045252	5.00798	https://www.genecards.org/cgi-bin/carddisp.pl?gene=SLPI
CLEC7A	C-Type Lectin Domain Containing 7A	Protein Coding	Q9BXN2	54	GC12M029494	5.00652	https://www.genecards.org/cgi-bin/carddisp.pl?gene=CLEC7A
CEBPB	CCAAT Enhancer Binding Protein Beta	Protein Coding	P17676	53	GC20P050190	5.00604	https://www.genecards.org/cgi-bin/carddisp.pl?gene=CEBPB
MIR211	MicroRNA 211	RNA Gene		29	GC15M031065	5.00554	https://www.genecards.org/cgi-bin/carddisp.pl?gene=MIR211
ADD1	Adducin 1	Protein Coding	P35611	53	GC04P004070	5.003	https://www.genecards.org/cgi-bin/carddisp.pl?gene=ADD1
DLEU2	Deleted In Lymphocytic Leukemia 2	RNA Gene		30	GC13M049913	5.00076	https://www.genecards.org/cgi-bin/carddisp.pl?gene=DLEU2
MPZ	Myelin Protein Zero	Protein Coding	P25189	52	GC01M161345	4.9967	https://www.genecards.org/cgi-bin/carddisp.pl?gene=MPZ
CYP3A5	Cytochrome P450 Family 3 Subfamily A Member 5	Protein Coding	P20815	53	GC07M099648	4.99402	https://www.genecards.org/cgi-bin/carddisp.pl?gene=CYP3A5
MST1R	Macrophage Stimulating 1 Receptor	Protein Coding	Q04912	58	GC03M053764	4.99381	https://www.genecards.org/cgi-bin/carddisp.pl?gene=MST1R
SERPINB2	Serpin Family B Member 2	Protein Coding	P05120	53	GC18P063871	4.97745	https://www.genecards.org/cgi-bin/carddisp.pl?gene=SERPINB2
PMP22	Peripheral Myelin Protein 22	Protein Coding	Q01453	52	GC17M015229	4.97621	https://www.genecards.org/cgi-bin/carddisp.pl?gene=PMP22
IRF3	Interferon Regulatory Factor 3	Protein Coding	Q14653	54	GC19M049659	4.97317	https://www.genecards.org/cgi-bin/carddisp.pl?gene=IRF3
PXDN	Peroxidasin	Protein Coding	Q92626	53	GC02M001635	4.95617	https://www.genecards.org/cgi-bin/carddisp.pl?gene=PXDN
UROD	Uroporphyrinogen Decarboxylase	Protein Coding	P06132	54	GC01P049890	4.95267	https://www.genecards.org/cgi-bin/carddisp.pl?gene=UROD
LOC129992166	ATAC-STARR-Seq Lymphoblastoid Silent Region 15229	Functional Element		5	GC04P006276	4.95225	https://www.genecards.org/cgi-bin/carddisp.pl?gene=LOC129992166
TNFRSF18	TNF Receptor Superfamily Member 18	Protein Coding	Q9Y5U5	51	GC01M001203	4.94806	https://www.genecards.org/cgi-bin/carddisp.pl?gene=TNFRSF18
SNHG12	Small Nucleolar RNA Host Gene 12	RNA Gene	Q9BXW3	30	GC01M031297	4.94699	https://www.genecards.org/cgi-bin/carddisp.pl?gene=SNHG12
AURKA	Aurora Kinase A	Protein Coding	O14965	60	GC20M056370	4.94685	https://www.genecards.org/cgi-bin/carddisp.pl?gene=AURKA
POLG2	DNA Polymerase Gamma 2, Accessory Subunit	Protein Coding	Q9UHN1	50	GC17M064477	4.94664	https://www.genecards.org/cgi-bin/carddisp.pl?gene=POLG2
PDE11A	Phosphodiesterase 11A	Protein Coding	Q9HCR9	53	GC02M177624	4.94611	https://www.genecards.org/cgi-bin/carddisp.pl?gene=PDE11A
GSTM3	Glutathione S-Transferase Mu 3	Protein Coding	P21266	54	GC01M109733	4.93612	https://www.genecards.org/cgi-bin/carddisp.pl?gene=GSTM3
VKORC1	Vitamin K Epoxide Reductase Complex Subunit 1	Protein Coding	Q9BQB6	58	GC16M044160	4.93459	https://www.genecards.org/cgi-bin/carddisp.pl?gene=VKORC1
HOXB13	Homeobox B13	Protein Coding	Q92826	50	GC17M078158	4.9314	https://www.genecards.org/cgi-bin/carddisp.pl?gene=HOXB13
TBXT	T-Box Transcription Factor T	Protein Coding	O15178	53	GC06M166158	4.92993	https://www.genecards.org/cgi-bin/carddisp.pl?gene=TBXT
DNASE2	Deoxyribonuclease 2, Lysosomal	Protein Coding	O00115	49	GC19M012875	4.9257	https://www.genecards.org/cgi-bin/carddisp.pl?gene=DNASE2
MYOD1	Myogenic Differentiation 1	Protein Coding	P15172	55	GC11P017719	4.92301	https://www.genecards.org/cgi-bin/carddisp.pl?gene=MYOD1
GFI1	Growth Factor Independent 1 Transcriptional Repressor	Protein Coding	Q99684	50	GC01M092474	4.92106	https://www.genecards.org/cgi-bin/carddisp.pl?gene=GFI1
WT1	WT1 Transcription Factor	Protein Coding	P19544	56	GC11M032365	4.91674	https://www.genecards.org/cgi-bin/carddisp.pl?gene=WT1
TREM1	Triggering Receptor Expressed On Myeloid Cells 1	Protein Coding	Q9NP99	51	GC06M041267	4.90798	https://www.genecards.org/cgi-bin/carddisp.pl?gene=TREM1
TCF7	Transcription Factor 7	Protein Coding	P36402	51	GC05P134192	4.90561	https://www.genecards.org/cgi-bin/carddisp.pl?gene=TCF7
DES	Desmin	Protein Coding	P17661	56	GC02P219418	4.90528	https://www.genecards.org/cgi-bin/carddisp.pl?gene=DES
ARMC5	Armadillo Repeat Containing 5	Protein Coding	Q96C12	45	GC16P081733	4.89951	https://www.genecards.org/cgi-bin/carddisp.pl?gene=ARMC5
TNFRSF14	TNF Receptor Superfamily Member 14	Protein Coding	Q92956	51	GC01P020542	4.89656	https://www.genecards.org/cgi-bin/carddisp.pl?gene=TNFRSF14
WT1-AS	WT1 Antisense RNA	RNA Gene	Q06250	34	GC11P032434	4.8846	https://www.genecards.org/cgi-bin/carddisp.pl?gene=WT1-AS
TYR	Tyrosinase	Protein Coding	P14679	57	GC11P089177	4.88271	https://www.genecards.org/cgi-bin/carddisp.pl?gene=TYR
RPS26	Ribosomal Protein S26	Protein Coding	P62854	52	GC12P060592	4.88119	https://www.genecards.org/cgi-bin/carddisp.pl?gene=RPS26
SRF	Serum Response Factor	Protein Coding	P11831	52	GC06P043171	4.87999	https://www.genecards.org/cgi-bin/carddisp.pl?gene=SRF
KITLG	KIT Ligand	Protein Coding	P21583	55	GC12M088492	4.87408	https://www.genecards.org/cgi-bin/carddisp.pl?gene=KITLG
MIR29B2	MicroRNA 29b-2	RNA Gene		25	GC01M207833	4.87326	https://www.genecards.org/cgi-bin/carddisp.pl?gene=MIR29B2
KRT5	Keratin 5	Protein Coding	P13647	54	GC12M052514	4.87143	https://www.genecards.org/cgi-bin/carddisp.pl?gene=KRT5
ITPR1	Inositol 1,4,5-Trisphosphate Receptor Type 1	Protein Coding	Q14643	58	GC03P004486	4.86813	https://www.genecards.org/cgi-bin/carddisp.pl?gene=ITPR1
PRKDC	Protein Kinase, DNA-Activated, Catalytic Subunit	Protein Coding	P78527	59	GC08M047773	4.86377	https://www.genecards.org/cgi-bin/carddisp.pl?gene=PRKDC
COL4A5	Collagen Type IV Alpha 5 Chain	Protein Coding	P29400	52	GC0XP108439	4.86169	https://www.genecards.org/cgi-bin/carddisp.pl?gene=COL4A5
HDC	Histidine Decarboxylase	Protein Coding	P19113	53	GC15M050241	4.85878	https://www.genecards.org/cgi-bin/carddisp.pl?gene=HDC
MIR331	MicroRNA 331	RNA Gene		27	GC12P095308	4.85586	https://www.genecards.org/cgi-bin/carddisp.pl?gene=MIR331
INPP5E	Inositol Polyphosphate-5-Phosphatase E	Protein Coding	Q9NRR6	50	GC09M136428	4.85318	https://www.genecards.org/cgi-bin/carddisp.pl?gene=INPP5E
IRAK4	Interleukin 1 Receptor Associated Kinase 4	Protein Coding	Q9NWZ3	58	GC12P043758	4.85203	https://www.genecards.org/cgi-bin/carddisp.pl?gene=IRAK4
AQP10	Aquaporin 10	Protein Coding	Q96PS8	43	GC01P154321	4.84744	https://www.genecards.org/cgi-bin/carddisp.pl?gene=AQP10
FLT4	Fms Related Receptor Tyrosine Kinase 4	Protein Coding	P35916	61	GC05M182574	4.84495	https://www.genecards.org/cgi-bin/carddisp.pl?gene=FLT4
HSPG2	Heparan Sulfate Proteoglycan 2	Protein Coding	P98160	56	GC01M021822	4.84393	https://www.genecards.org/cgi-bin/carddisp.pl?gene=HSPG2
FTL	Ferritin Light Chain	Protein Coding	P02792	55	GC19P048965	4.84319	https://www.genecards.org/cgi-bin/carddisp.pl?gene=FTL
SCLT1	Sodium Channel And Clathrin Linker 1	Protein Coding	Q96NL6	43	GC04M128864	4.84134	https://www.genecards.org/cgi-bin/carddisp.pl?gene=SCLT1
IL1R2	Interleukin 1 Receptor Type 2	Protein Coding	P27930	53	GC02P101991	4.83931	https://www.genecards.org/cgi-bin/carddisp.pl?gene=IL1R2
CCNB1	Cyclin B1	Protein Coding	P14635	56	GC05P069167	4.83481	https://www.genecards.org/cgi-bin/carddisp.pl?gene=CCNB1
MYO7A	Myosin VIIA	Protein Coding	Q13402	51	GC11P077128	4.83345	https://www.genecards.org/cgi-bin/carddisp.pl?gene=MYO7A
MIR137	MicroRNA 137	RNA Gene		25	GC01M098046	4.82987	https://www.genecards.org/cgi-bin/carddisp.pl?gene=MIR137
COL3A1	Collagen Type III Alpha 1 Chain	Protein Coding	P02461	56	GC02P188974	4.8225	https://www.genecards.org/cgi-bin/carddisp.pl?gene=COL3A1
BTK	Bruton Tyrosine Kinase	Protein Coding	Q06187	62	GC0XM101349	4.82155	https://www.genecards.org/cgi-bin/carddisp.pl?gene=BTK
DMD	Dystrophin	Protein Coding	P11532	54	GC0XM031097	4.81747	https://www.genecards.org/cgi-bin/carddisp.pl?gene=DMD
HOXA11-AS	HOXA11 Antisense RNA	RNA Gene		28	GC07P027184	4.81695	https://www.genecards.org/cgi-bin/carddisp.pl?gene=HOXA11-AS
NTRK2	Neurotrophic Receptor Tyrosine Kinase 2	Protein Coding	Q16620	62	GC09P084668	4.81324	https://www.genecards.org/cgi-bin/carddisp.pl?gene=NTRK2
CD1D	CD1d Molecule	Protein Coding	P15813	51	GC01P158178	4.80807	https://www.genecards.org/cgi-bin/carddisp.pl?gene=CD1D
FGF5	Fibroblast Growth Factor 5	Protein Coding	P12034	53	GC04P080266	4.80303	https://www.genecards.org/cgi-bin/carddisp.pl?gene=FGF5
GCLC	Glutamate-Cysteine Ligase Catalytic Subunit	Protein Coding	P48506	53	GC06M053497	4.8029	https://www.genecards.org/cgi-bin/carddisp.pl?gene=GCLC
KIR2DL2	Killer Cell Immunoglobulin Like Receptor, Two Ig Domains And Long Cytoplasmic Tail 2	Protein Coding	P43627	27	GC19MR00107	4.794	https://www.genecards.org/cgi-bin/carddisp.pl?gene=KIR2DL2
MALT1	MALT1 Paracaspase	Protein Coding	Q9UDY8	56	GC18P058671	4.79302	https://www.genecards.org/cgi-bin/carddisp.pl?gene=MALT1
SUFU	SUFU Negative Regulator Of Hedgehog Signaling	Protein Coding	Q9UMX1	52	GC10P109844	4.78821	https://www.genecards.org/cgi-bin/carddisp.pl?gene=SUFU
HBD	Hemoglobin Subunit Delta	Protein Coding	P02042	48	GC11M005232	4.78725	https://www.genecards.org/cgi-bin/carddisp.pl?gene=HBD
PGA5	Pepsinogen A5	Protein Coding	P0DJD9	44	GC11P061241	4.78531	https://www.genecards.org/cgi-bin/carddisp.pl?gene=PGA5
SAMD9	Sterile Alpha Motif Domain Containing 9	Protein Coding	Q5K651	44	GC07M093099	4.78009	https://www.genecards.org/cgi-bin/carddisp.pl?gene=SAMD9
TRPM8	Transient Receptor Potential Cation Channel Subfamily M Member 8	Protein Coding	Q7Z2W7	54	GC02P233917	4.7796	https://www.genecards.org/cgi-bin/carddisp.pl?gene=TRPM8
CD226	CD226 Molecule	Protein Coding	Q15762	50	GC18M069831	4.77874	https://www.genecards.org/cgi-bin/carddisp.pl?gene=CD226
CDK6	Cyclin Dependent Kinase 6	Protein Coding	Q00534	60	GC07M092604	4.77783	https://www.genecards.org/cgi-bin/carddisp.pl?gene=CDK6
LOC101929710	Uncharacterized LOC101929710	RNA Gene		17	GC05P095962	4.77563	https://www.genecards.org/cgi-bin/carddisp.pl?gene=LOC101929710
CERKL	Ceramide Kinase Like	Protein Coding	Q49MI3	46	GC02M181536	4.77555	https://www.genecards.org/cgi-bin/carddisp.pl?gene=CERKL
ITGA1	Integrin Subunit Alpha 1	Protein Coding	P56199	53	GC05P052788	4.77465	https://www.genecards.org/cgi-bin/carddisp.pl?gene=ITGA1
PRKN	Parkin RBR E3 Ubiquitin Protein Ligase	Protein Coding	O60260	58	GC06M161348	4.77072	https://www.genecards.org/cgi-bin/carddisp.pl?gene=PRKN
RARA	Retinoic Acid Receptor Alpha	Protein Coding	P10276	59	GC17P040309	4.76632	https://www.genecards.org/cgi-bin/carddisp.pl?gene=RARA
PSC	Cholangitis, Primary Sclerosing	Genetic Locus		6	GC03U901834	4.76573	https://www.genecards.org/cgi-bin/carddisp.pl?gene=PSC
FOSL1	FOS Like 1, AP-1 Transcription Factor Subunit	Protein Coding	P15407	54	GC11M125414	4.76193	https://www.genecards.org/cgi-bin/carddisp.pl?gene=FOSL1
ENSA	Endosulfine Alpha	Protein Coding	O43768	46	GC01M160774	4.76096	https://www.genecards.org/cgi-bin/carddisp.pl?gene=ENSA
AQP11	Aquaporin 11	Protein Coding	Q8NBQ7	43	GC11P077589	4.75838	https://www.genecards.org/cgi-bin/carddisp.pl?gene=AQP11
ARHGAP1	Rho GTPase Activating Protein 1	Protein Coding	Q07960	51	GC11M124988	4.75413	https://www.genecards.org/cgi-bin/carddisp.pl?gene=ARHGAP1
POSTN	Periostin	Protein Coding	Q15063	51	GC13M037562	4.75297	https://www.genecards.org/cgi-bin/carddisp.pl?gene=POSTN
GLUL	Glutamate-Ammonia Ligase	Protein Coding	P15104	57	GC01M182378	4.75274	https://www.genecards.org/cgi-bin/carddisp.pl?gene=GLUL
IL1RL2	Interleukin 1 Receptor Like 2	Protein Coding	Q9HB29	52	GC02P102186	4.74823	https://www.genecards.org/cgi-bin/carddisp.pl?gene=IL1RL2
ABCC2	ATP Binding Cassette Subfamily C Member 2	Protein Coding	Q92887	57	GC10P099782	4.74618	https://www.genecards.org/cgi-bin/carddisp.pl?gene=ABCC2
CHAT	Choline O-Acetyltransferase	Protein Coding	P28329	57	GC10P049609	4.74321	https://www.genecards.org/cgi-bin/carddisp.pl?gene=CHAT
RNU6-1	RNA, U6 Small Nuclear 1	RNA Gene		21	GC15M067839	4.74244	https://www.genecards.org/cgi-bin/carddisp.pl?gene=RNU6-1
CGA	Glycoprotein Hormones, Alpha Polypeptide	Protein Coding	P01215	54	GC06M087085	4.74145	https://www.genecards.org/cgi-bin/carddisp.pl?gene=CGA
BIRC3	Baculoviral IAP Repeat Containing 3	Protein Coding	Q13489	54	GC11P102317	4.73894	https://www.genecards.org/cgi-bin/carddisp.pl?gene=BIRC3
RARB	Retinoic Acid Receptor Beta	Protein Coding	P10826	58	GC03P024689	4.73889	https://www.genecards.org/cgi-bin/carddisp.pl?gene=RARB
CYBB	Cytochrome B-245 Beta Chain	Protein Coding	P04839	58	GC0XP037780	4.73735	https://www.genecards.org/cgi-bin/carddisp.pl?gene=CYBB
OSM	Oncostatin M	Protein Coding	P13725	52	GC22M030262	4.73712	https://www.genecards.org/cgi-bin/carddisp.pl?gene=OSM
IDH1	Isocitrate Dehydrogenase (NADP(+)) 1	Protein Coding	O75874	61	GC02M208236	4.73153	https://www.genecards.org/cgi-bin/carddisp.pl?gene=IDH1
MAGI2	Membrane Associated Guanylate Kinase, WW And PDZ Domain Containing 2	Protein Coding	Q86UL8	52	GC07M078017	4.73072	https://www.genecards.org/cgi-bin/carddisp.pl?gene=MAGI2
ARL2BP	ADP Ribosylation Factor Like GTPase 2 Binding Protein	Protein Coding	Q9Y2Y0	46	GC16P057245	4.72375	https://www.genecards.org/cgi-bin/carddisp.pl?gene=ARL2BP
BECN1	Beclin 1	Protein Coding	Q14457	55	GC17M042810	4.72287	https://www.genecards.org/cgi-bin/carddisp.pl?gene=BECN1
TGM2	Transglutaminase 2	Protein Coding	P21980	56	GC20M038127	4.72138	https://www.genecards.org/cgi-bin/carddisp.pl?gene=TGM2
SELENOP	Selenoprotein P	Protein Coding	P49908	45	GC05M042800	4.71079	https://www.genecards.org/cgi-bin/carddisp.pl?gene=SELENOP
ADAMTS13	ADAM Metallopeptidase With Thrombospondin Type 1 Motif 13	Protein Coding	Q76LX8	56	GC09P133414	4.71005	https://www.genecards.org/cgi-bin/carddisp.pl?gene=ADAMTS13
STAT5A	Signal Transducer And Activator Of Transcription 5A	Protein Coding	P42229	56	GC17P042287	4.70765	https://www.genecards.org/cgi-bin/carddisp.pl?gene=STAT5A
SH2B1	SH2B Adaptor Protein 1	Protein Coding	Q9NRF2	50	GC16P081415	4.70485	https://www.genecards.org/cgi-bin/carddisp.pl?gene=SH2B1
SCARNA5	Small Cajal Body-Specific RNA 5	RNA Gene		23	GC02P233275	4.69933	https://www.genecards.org/cgi-bin/carddisp.pl?gene=SCARNA5
AIF1	Allograft Inflammatory Factor 1	Protein Coding	P55008	48	GC06P134819	4.6956	https://www.genecards.org/cgi-bin/carddisp.pl?gene=AIF1
ISG15	ISG15 Ubiquitin Like Modifier	Protein Coding	P05161	55	GC01P001001	4.69445	https://www.genecards.org/cgi-bin/carddisp.pl?gene=ISG15
DDC	Dopa Decarboxylase	Protein Coding	P20711	59	GC07M050458	4.69306	https://www.genecards.org/cgi-bin/carddisp.pl?gene=DDC
SNORD44	Small Nucleolar RNA, C/D Box 44	RNA Gene		18	GC01M174931	4.68852	https://www.genecards.org/cgi-bin/carddisp.pl?gene=SNORD44
TNFRSF4	TNF Receptor Superfamily Member 4	Protein Coding	P43489	53	GC01M001211	4.68256	https://www.genecards.org/cgi-bin/carddisp.pl?gene=TNFRSF4
PGM1	Phosphoglucomutase 1	Protein Coding	P36871	54	GC01P063593	4.67851	https://www.genecards.org/cgi-bin/carddisp.pl?gene=PGM1
CXCL2	C-X-C Motif Chemokine Ligand 2	Protein Coding	P19875	48	GC04M074097	4.66173	https://www.genecards.org/cgi-bin/carddisp.pl?gene=CXCL2
XRCC6	X-Ray Repair Cross Complementing 6	Protein Coding	P12956	54	GC22P070718	4.65962	https://www.genecards.org/cgi-bin/carddisp.pl?gene=XRCC6
SLC46A1	Solute Carrier Family 46 Member 1	Protein Coding	Q96NT5	51	GC17M076387	4.65887	https://www.genecards.org/cgi-bin/carddisp.pl?gene=SLC46A1
F2R	Coagulation Factor II Thrombin Receptor	Protein Coding	P25116	55	GC05P076716	4.65715	https://www.genecards.org/cgi-bin/carddisp.pl?gene=F2R
MSH5	MutS Homolog 5	Protein Coding	O43196	51	GC06P134833	4.65679	https://www.genecards.org/cgi-bin/carddisp.pl?gene=MSH5
PIGR	Polymeric Immunoglobulin Receptor	Protein Coding	P01833	50	GC01M206928	4.6566	https://www.genecards.org/cgi-bin/carddisp.pl?gene=PIGR
SKIC2	SKI2 Subunit Of Superkiller Complex	Protein Coding	Q15477	52	GC06P144468	4.65231	https://www.genecards.org/cgi-bin/carddisp.pl?gene=SKIC2
IL20	Interleukin 20	Protein Coding	Q9NYY1	47	GC01P206866	4.65222	https://www.genecards.org/cgi-bin/carddisp.pl?gene=IL20
AOPEP	Aminopeptidase O (Putative)	Protein Coding	Q8N6M6	48	GC09P100470	4.65152	https://www.genecards.org/cgi-bin/carddisp.pl?gene=AOPEP
CKM	Creatine Kinase, M-Type	Protein Coding	P06732	53	GC19M045306	4.6512	https://www.genecards.org/cgi-bin/carddisp.pl?gene=CKM
CEACAM6	CEA Cell Adhesion Molecule 6	Protein Coding	P40199	49	GC19P041750	4.64917	https://www.genecards.org/cgi-bin/carddisp.pl?gene=CEACAM6
SSTR5	Somatostatin Receptor 5	Protein Coding	P35346	51	GC16P080180	4.64011	https://www.genecards.org/cgi-bin/carddisp.pl?gene=SSTR5
GIMAP5	GTPase, IMAP Family Member 5	Protein Coding	Q96F15	46	GC07P150722	4.63775	https://www.genecards.org/cgi-bin/carddisp.pl?gene=GIMAP5
MIRLET7F1	MicroRNA Let-7f-1	RNA Gene		25	GC09P100423	4.63559	https://www.genecards.org/cgi-bin/carddisp.pl?gene=MIRLET7F1
GCC1	GRIP And Coiled-Coil Domain Containing 1	Protein Coding	Q96CN9	43	GC07M127580	4.63336	https://www.genecards.org/cgi-bin/carddisp.pl?gene=GCC1
KCTD15	Potassium Channel Tetramerization Domain Containing 15	Protein Coding	Q96SI1	44	GC19P112890	4.63191	https://www.genecards.org/cgi-bin/carddisp.pl?gene=KCTD15
CD27	CD27 Molecule	Protein Coding	P26842	55	GC12P038949	4.63116	https://www.genecards.org/cgi-bin/carddisp.pl?gene=CD27
GHET1	Gastric Carcinoma Proliferation Enhancing Transcript 1	RNA Gene		19	GC07P157983	4.62797	https://www.genecards.org/cgi-bin/carddisp.pl?gene=GHET1
LNCRNA-ATB	LncRNA Activated By TGF-Beta	RNA Gene		14	GC14P046547	4.62797	https://www.genecards.org/cgi-bin/carddisp.pl?gene=LNCRNA-ATB
HSP90B1	Heat Shock Protein 90 Beta Family Member 1	Protein Coding	P14625	55	GC12P103930	4.627	https://www.genecards.org/cgi-bin/carddisp.pl?gene=HSP90B1
DLEU1	Deleted In Lymphocytic Leukemia 1	RNA Gene	O43261	36	GC13P050677	4.62581	https://www.genecards.org/cgi-bin/carddisp.pl?gene=DLEU1
RUNX2	RUNX Family Transcription Factor 2	Protein Coding	Q13950	55	GC06P135072	4.62464	https://www.genecards.org/cgi-bin/carddisp.pl?gene=RUNX2
PC	Pyruvate Carboxylase	Protein Coding	P11498	55	GC11M066848	4.62331	https://www.genecards.org/cgi-bin/carddisp.pl?gene=PC
ZPBP2	Zona Pellucida Binding Protein 2	Protein Coding	Q6X784	40	GC17P112231	4.62239	https://www.genecards.org/cgi-bin/carddisp.pl?gene=ZPBP2
FOXC1	Forkhead Box C1	Protein Coding	Q12948	52	GC06P001635	4.61982	https://www.genecards.org/cgi-bin/carddisp.pl?gene=FOXC1
COL17A1	Collagen Type XVII Alpha 1 Chain	Protein Coding	Q9UMD9	53	GC10M104031	4.61777	https://www.genecards.org/cgi-bin/carddisp.pl?gene=COL17A1
LINC-PINT	Long Intergenic Non-Protein Coding RNA, P53 Induced Transcript	RNA Gene	A0A455ZAR2	24	GC07M130795	4.61752	https://www.genecards.org/cgi-bin/carddisp.pl?gene=LINC-PINT
CHIT1	Chitinase 1	Protein Coding	Q13231	53	GC01M203213	4.61588	https://www.genecards.org/cgi-bin/carddisp.pl?gene=CHIT1
TRPA1	Transient Receptor Potential Cation Channel Subfamily A Member 1	Protein Coding	O75762	56	GC08M072019	4.61355	https://www.genecards.org/cgi-bin/carddisp.pl?gene=TRPA1
DSP	Desmoplakin	Protein Coding	P15924	59	GC06P007541	4.61047	https://www.genecards.org/cgi-bin/carddisp.pl?gene=DSP
LSP1	Lymphocyte Specific Protein 1	Protein Coding	P33241	48	GC11P010661	4.60758	https://www.genecards.org/cgi-bin/carddisp.pl?gene=LSP1
TNFRSF9	TNF Receptor Superfamily Member 9	Protein Coding	Q07011	53	GC01M007915	4.60716	https://www.genecards.org/cgi-bin/carddisp.pl?gene=TNFRSF9
CEBPA	CCAAT Enhancer Binding Protein Alpha	Protein Coding	P49715	54	GC19M033299	4.60663	https://www.genecards.org/cgi-bin/carddisp.pl?gene=CEBPA
FGF4	Fibroblast Growth Factor 4	Protein Coding	P08620	53	GC11M125587	4.60345	https://www.genecards.org/cgi-bin/carddisp.pl?gene=FGF4
PLEC	Plectin	Protein Coding	Q15149	52	GC08M146598	4.60074	https://www.genecards.org/cgi-bin/carddisp.pl?gene=PLEC
OGG1	8-Oxoguanine DNA Glycosylase	Protein Coding	O15527	56	GC03P021488	4.60074	https://www.genecards.org/cgi-bin/carddisp.pl?gene=OGG1
BSN	Bassoon Presynaptic Cytomatrix Protein	Protein Coding	Q9UPA5	41	GC03P049554	4.5957	https://www.genecards.org/cgi-bin/carddisp.pl?gene=BSN
MAP3K1	Mitogen-Activated Protein Kinase Kinase Kinase 1	Protein Coding	Q13233	58	GC05P056815	4.59535	https://www.genecards.org/cgi-bin/carddisp.pl?gene=MAP3K1
IL9	Interleukin 9	Protein Coding	P15248	52	GC05M135891	4.59154	https://www.genecards.org/cgi-bin/carddisp.pl?gene=IL9
CLDN4	Claudin 4	Protein Coding	O14493	50	GC07P073799	4.58888	https://www.genecards.org/cgi-bin/carddisp.pl?gene=CLDN4
WRAP53	WD Repeat Containing Antisense To TP53	Protein Coding	Q9BUR4	50	GC17P111193	4.58608	https://www.genecards.org/cgi-bin/carddisp.pl?gene=WRAP53
PDE6B	Phosphodiesterase 6B	Protein Coding	P35913	55	GC04P003844	4.58601	https://www.genecards.org/cgi-bin/carddisp.pl?gene=PDE6B
LSM11	LSM11, U7 Small Nuclear RNA Associated	Protein Coding	P83369	44	GC05P157743	4.58335	https://www.genecards.org/cgi-bin/carddisp.pl?gene=LSM11
EZR	Ezrin	Protein Coding	P15311	54	GC06M158765	4.58148	https://www.genecards.org/cgi-bin/carddisp.pl?gene=EZR
JAK3	Janus Kinase 3	Protein Coding	P52333	59	GC19M017824	4.5814	https://www.genecards.org/cgi-bin/carddisp.pl?gene=JAK3
AXIN1	Axin 1	Protein Coding	O15169	55	GC16M000287	4.57494	https://www.genecards.org/cgi-bin/carddisp.pl?gene=AXIN1
PON3	Paraoxonase 3	Protein Coding	Q15166	53	GC07M095359	4.57489	https://www.genecards.org/cgi-bin/carddisp.pl?gene=PON3
TRC-GCA24-1	TRNA-Cys (GCA) 24-1	RNA Gene		11	GC17M077502	4.57318	https://www.genecards.org/cgi-bin/carddisp.pl?gene=TRC-GCA24-1
ADH1B	Alcohol Dehydrogenase 1B (Class I), Beta Polypeptide	Protein Coding	P00325	54	GC04M099304	4.57038	https://www.genecards.org/cgi-bin/carddisp.pl?gene=ADH1B
CDH2	Cadherin 2	Protein Coding	P19022	60	GC18M034101	4.56997	https://www.genecards.org/cgi-bin/carddisp.pl?gene=CDH2
JAG1	Jagged Canonical Notch Ligand 1	Protein Coding	P78504	59	GC20M010637	4.56752	https://www.genecards.org/cgi-bin/carddisp.pl?gene=JAG1
NCS1	Neuronal Calcium Sensor 1	Protein Coding	P62166	50	GC09P130172	4.56737	https://www.genecards.org/cgi-bin/carddisp.pl?gene=NCS1
NPTN-IT1	NPTN Intronic Transcript 1	RNA Gene		19	GC15M073566	4.55998	https://www.genecards.org/cgi-bin/carddisp.pl?gene=NPTN-IT1
DARS2	Aspartyl-TRNA Synthetase 2, Mitochondrial	Protein Coding	Q6PI48	52	GC01P173824	4.55797	https://www.genecards.org/cgi-bin/carddisp.pl?gene=DARS2
PDGFA	Platelet Derived Growth Factor Subunit A	Protein Coding	P04085	53	GC07M000497	4.55452	https://www.genecards.org/cgi-bin/carddisp.pl?gene=PDGFA
TRA-TGC7-1	TRNA-Ala (Anticodon TGC) 7-1	RNA Gene		14	GC06M093612	4.55223	https://www.genecards.org/cgi-bin/carddisp.pl?gene=TRA-TGC7-1
PTK2	Protein Tyrosine Kinase 2	Protein Coding	Q05397	56	GC08M140657	4.54729	https://www.genecards.org/cgi-bin/carddisp.pl?gene=PTK2
SNORD118	Small Nucleolar RNA, C/D Box 118	RNA Gene		25	GC17M074901	4.54441	https://www.genecards.org/cgi-bin/carddisp.pl?gene=SNORD118
MAFB	MAF BZIP Transcription Factor B	Protein Coding	Q9Y5Q3	52	GC20M040685	4.53987	https://www.genecards.org/cgi-bin/carddisp.pl?gene=MAFB
CLDN1	Claudin 1	Protein Coding	O95832	55	GC03M190305	4.53948	https://www.genecards.org/cgi-bin/carddisp.pl?gene=CLDN1
FITM2	Fat Storage Inducing Transmembrane Protein 2	Protein Coding	Q8N6M3	43	GC20M044302	4.53396	https://www.genecards.org/cgi-bin/carddisp.pl?gene=FITM2
CCN1	Cellular Communication Network Factor 1	Protein Coding	O00622	49	GC01P085585	4.52767	https://www.genecards.org/cgi-bin/carddisp.pl?gene=CCN1
TFPI	Tissue Factor Pathway Inhibitor	Protein Coding	P10646	54	GC02M187464	4.52534	https://www.genecards.org/cgi-bin/carddisp.pl?gene=TFPI
IL1RL1	Interleukin 1 Receptor Like 1	Protein Coding	Q01638	50	GC02P102294	4.52189	https://www.genecards.org/cgi-bin/carddisp.pl?gene=IL1RL1
RBFOX1	RNA Binding Fox-1 Homolog 1	Protein Coding	Q9NWB1	49	GC16P080539	4.51707	https://www.genecards.org/cgi-bin/carddisp.pl?gene=RBFOX1
PROC	Protein C, Inactivator Of Coagulation Factors Va And VIIIa	Protein Coding	P04070	60	GC02P127418	4.51023	https://www.genecards.org/cgi-bin/carddisp.pl?gene=PROC
RAB4B-EGLN2	RAB4B-EGLN2 Readthrough (NMD Candidate)	RNA Gene		18	GC19P040778	4.50476	https://www.genecards.org/cgi-bin/carddisp.pl?gene=RAB4B-EGLN2
PGM3	Phosphoglucomutase 3	Protein Coding	O95394	50	GC06M094594	4.49761	https://www.genecards.org/cgi-bin/carddisp.pl?gene=PGM3
HCRT	Hypocretin Neuropeptide Precursor	Protein Coding	O43612	48	GC17M077709	4.49664	https://www.genecards.org/cgi-bin/carddisp.pl?gene=HCRT
TIMP4	TIMP Metallopeptidase Inhibitor 4	Protein Coding	Q99727	46	GC03M012153	4.4953	https://www.genecards.org/cgi-bin/carddisp.pl?gene=TIMP4
ATF3	Activating Transcription Factor 3	Protein Coding	P18847	53	GC01P212565	4.48928	https://www.genecards.org/cgi-bin/carddisp.pl?gene=ATF3
DKK1	Dickkopf WNT Signaling Pathway Inhibitor 1	Protein Coding	O94907	53	GC10P052314	4.48707	https://www.genecards.org/cgi-bin/carddisp.pl?gene=DKK1
SNHG7	Small Nucleolar RNA Host Gene 7	RNA Gene		29	GC09M138725	4.48494	https://www.genecards.org/cgi-bin/carddisp.pl?gene=SNHG7
TNFSF12	TNF Superfamily Member 12	Protein Coding	O43508	46	GC17P111184	4.47987	https://www.genecards.org/cgi-bin/carddisp.pl?gene=TNFSF12
NEGR1	Neuronal Growth Regulator 1	Protein Coding	Q7Z3B1	47	GC01M071395	4.47744	https://www.genecards.org/cgi-bin/carddisp.pl?gene=NEGR1
SNAI1	Snail Family Transcriptional Repressor 1	Protein Coding	O95863	53	GC20P049982	4.47563	https://www.genecards.org/cgi-bin/carddisp.pl?gene=SNAI1
VCP	Valosin Containing Protein	Protein Coding	P55072	58	GC09M035085	4.47497	https://www.genecards.org/cgi-bin/carddisp.pl?gene=VCP
RBBP8	RB Binding Protein 8, Endonuclease	Protein Coding	Q99708	53	GC18P022798	4.47174	https://www.genecards.org/cgi-bin/carddisp.pl?gene=RBBP8
KIR2DL3	Killer Cell Immunoglobulin Like Receptor, Two Ig Domains And Long Cytoplasmic Tail 3	Protein Coding	P43628	45	GC19P114637	4.47103	https://www.genecards.org/cgi-bin/carddisp.pl?gene=KIR2DL3
CYP2R1	Cytochrome P450 Family 2 Subfamily R Member 1	Protein Coding	Q6VVX0	52	GC11M014877	4.46991	https://www.genecards.org/cgi-bin/carddisp.pl?gene=CYP2R1
XYLT2	Xylosyltransferase 2	Protein Coding	Q9H1B5	54	GC17P112624	4.46314	https://www.genecards.org/cgi-bin/carddisp.pl?gene=XYLT2
CCND2	Cyclin D2	Protein Coding	P30279	57	GC12P038923	4.45245	https://www.genecards.org/cgi-bin/carddisp.pl?gene=CCND2
PXK	PX Domain Containing Serine/Threonine Kinase Like	Protein Coding	Q7Z7A4	47	GC03P059063	4.45144	https://www.genecards.org/cgi-bin/carddisp.pl?gene=PXK
COL18A1	Collagen Type XVIII Alpha 1 Chain	Protein Coding	P39060	55	GC21P045405	4.44746	https://www.genecards.org/cgi-bin/carddisp.pl?gene=COL18A1
PXDNL	Peroxidasin Like	Protein Coding	A1KZ92	43	GC08M051319	4.43691	https://www.genecards.org/cgi-bin/carddisp.pl?gene=PXDNL
ICOSLG	Inducible T Cell Costimulator Ligand	Protein Coding	O75144	48	GC21M044313	4.43593	https://www.genecards.org/cgi-bin/carddisp.pl?gene=ICOSLG
OCLN	Occludin	Protein Coding	Q16625	52	GC05P069492	4.43226	https://www.genecards.org/cgi-bin/carddisp.pl?gene=OCLN
ENTPD1	Ectonucleoside Triphosphate Diphosphohydrolase 1	Protein Coding	P49961	58	GC10P109494	4.43216	https://www.genecards.org/cgi-bin/carddisp.pl?gene=ENTPD1
TRIB1	Tribbles Pseudokinase 1	Protein Coding	Q96RU8	44	GC08P125430	4.42907	https://www.genecards.org/cgi-bin/carddisp.pl?gene=TRIB1
ERAP2	Endoplasmic Reticulum Aminopeptidase 2	Protein Coding	Q6P179	49	GC05P096875	4.42903	https://www.genecards.org/cgi-bin/carddisp.pl?gene=ERAP2
FCGRT	Fc Gamma Receptor And Transporter	Protein Coding	P55899	52	GC19P049506	4.42376	https://www.genecards.org/cgi-bin/carddisp.pl?gene=FCGRT
IKBKG	Inhibitor Of Nuclear Factor Kappa B Kinase Regulatory Subunit Gamma	Protein Coding	Q9Y6K9	56	GC0XP154541	4.42153	https://www.genecards.org/cgi-bin/carddisp.pl?gene=IKBKG
RMI2	RecQ Mediated Genome Instability 2	Protein Coding	Q96E14	43	GC16P080673	4.42147	https://www.genecards.org/cgi-bin/carddisp.pl?gene=RMI2
ZPR1	ZPR1 Zinc Finger	Protein Coding	O75312	48	GC11M126472	4.42047	https://www.genecards.org/cgi-bin/carddisp.pl?gene=ZPR1
PDE4D	Phosphodiesterase 4D	Protein Coding	Q08499	58	GC05M058969	4.41931	https://www.genecards.org/cgi-bin/carddisp.pl?gene=PDE4D
HPRT1	Hypoxanthine Phosphoribosyltransferase 1	Protein Coding	P00492	57	GC0XP134460	4.41844	https://www.genecards.org/cgi-bin/carddisp.pl?gene=HPRT1
VHL	Von Hippel-Lindau Tumor Suppressor	Protein Coding	P40337	56	GC03P021526	4.41741	https://www.genecards.org/cgi-bin/carddisp.pl?gene=VHL
ADAD1	Adenosine Deaminase Domain Containing 1	Protein Coding	Q96M93	44	GC04P122378	4.41713	https://www.genecards.org/cgi-bin/carddisp.pl?gene=ADAD1
FOXP1	Forkhead Box P1	Protein Coding	Q9H334	53	GC03M070954	4.41695	https://www.genecards.org/cgi-bin/carddisp.pl?gene=FOXP1
SNHG15	Small Nucleolar RNA Host Gene 15	RNA Gene		29	GC07M045365	4.41671	https://www.genecards.org/cgi-bin/carddisp.pl?gene=SNHG15
MIR32	MicroRNA 32	RNA Gene		29	GC09M109046	4.40829	https://www.genecards.org/cgi-bin/carddisp.pl?gene=MIR32
LBP	Lipopolysaccharide Binding Protein	Protein Coding	P18428	52	GC20P038346	4.40816	https://www.genecards.org/cgi-bin/carddisp.pl?gene=LBP
SERPINB7	Serpin Family B Member 7	Protein Coding	O75635	49	GC18P063752	4.39721	https://www.genecards.org/cgi-bin/carddisp.pl?gene=SERPINB7
PGR	Progesterone Receptor	Protein Coding	P06401	59	GC11M126145	4.39406	https://www.genecards.org/cgi-bin/carddisp.pl?gene=PGR
RDX	Radixin	Protein Coding	P35241	56	GC11M109864	4.3916	https://www.genecards.org/cgi-bin/carddisp.pl?gene=RDX
GSTK1	Glutathione S-Transferase Kappa 1	Protein Coding	Q9Y2Q3	47	GC07P157909	4.38889	https://www.genecards.org/cgi-bin/carddisp.pl?gene=GSTK1
SLC26A9	Solute Carrier Family 26 Member 9	Protein Coding	Q7LBE3	46	GC01M205883	4.38733	https://www.genecards.org/cgi-bin/carddisp.pl?gene=SLC26A9
UBE2E2	Ubiquitin Conjugating Enzyme E2 E2	Protein Coding	Q96LR5	48	GC03P023221	4.38722	https://www.genecards.org/cgi-bin/carddisp.pl?gene=UBE2E2
MGP	Matrix Gla Protein	Protein Coding	P08493	52	GC12M029578	4.3869	https://www.genecards.org/cgi-bin/carddisp.pl?gene=MGP
SRD5A2	Steroid 5 Alpha-Reductase 2	Protein Coding	P31213	51	GC02M031522	4.38225	https://www.genecards.org/cgi-bin/carddisp.pl?gene=SRD5A2
TACR1	Tachykinin Receptor 1	Protein Coding	P25103	54	GC02M075597	4.3822	https://www.genecards.org/cgi-bin/carddisp.pl?gene=TACR1
PTH1R	Parathyroid Hormone 1 Receptor	Protein Coding	Q03431	59	GC03P046877	4.38203	https://www.genecards.org/cgi-bin/carddisp.pl?gene=PTH1R
AKR1B10	Aldo-Keto Reductase Family 1 Member B10	Protein Coding	O60218	52	GC07P134527	4.3802	https://www.genecards.org/cgi-bin/carddisp.pl?gene=AKR1B10
SSTR2	Somatostatin Receptor 2	Protein Coding	P30874	55	GC17P073165	4.37477	https://www.genecards.org/cgi-bin/carddisp.pl?gene=SSTR2
CCNY	Cyclin Y	Protein Coding	Q8ND76	42	GC10P035254	4.3719	https://www.genecards.org/cgi-bin/carddisp.pl?gene=CCNY
ADH7	Alcohol Dehydrogenase 7 (Class IV), Mu Or Sigma Polypeptide	Protein Coding	P40394	51	GC04M099412	4.36848	https://www.genecards.org/cgi-bin/carddisp.pl?gene=ADH7
AXL	AXL Receptor Tyrosine Kinase	Protein Coding	P30530	60	GC19P041219	4.36757	https://www.genecards.org/cgi-bin/carddisp.pl?gene=AXL
PTPRS	Protein Tyrosine Phosphatase Receptor Type S	Protein Coding	Q13332	53	GC19M091847	4.36325	https://www.genecards.org/cgi-bin/carddisp.pl?gene=PTPRS
PARD3	Par-3 Family Cell Polarity Regulator	Protein Coding	Q8TEW0	49	GC10M035793	4.35885	https://www.genecards.org/cgi-bin/carddisp.pl?gene=PARD3
ERCC2	ERCC Excision Repair 2, TFIIH Core Complex Helicase Subunit	Protein Coding	P18074	56	GC19M045349	4.35733	https://www.genecards.org/cgi-bin/carddisp.pl?gene=ERCC2
ACLY	ATP Citrate Lyase	Protein Coding	P53396	53	GC17M041866	4.35313	https://www.genecards.org/cgi-bin/carddisp.pl?gene=ACLY
STK4	Serine/Threonine Kinase 4	Protein Coding	Q13043	57	GC20P044966	4.35099	https://www.genecards.org/cgi-bin/carddisp.pl?gene=STK4
CNTNAP2	Contactin Associated Protein 2	Protein Coding	Q9UHC6	54	GC07P146116	4.35063	https://www.genecards.org/cgi-bin/carddisp.pl?gene=CNTNAP2
FEN1	Flap Structure-Specific Endonuclease 1	Protein Coding	P39748	55	GC11P088776	4.34961	https://www.genecards.org/cgi-bin/carddisp.pl?gene=FEN1
WDR1	WD Repeat Domain 1	Protein Coding	O75083	47	GC04M010073	4.34866	https://www.genecards.org/cgi-bin/carddisp.pl?gene=WDR1
MNT	MAX Network Transcriptional Repressor	Protein Coding	Q99583	44	GC17M002384	4.34655	https://www.genecards.org/cgi-bin/carddisp.pl?gene=MNT
MIR124-1	MicroRNA 124-1	RNA Gene		26	GC08M009903	4.34492	https://www.genecards.org/cgi-bin/carddisp.pl?gene=MIR124-1
ARRB2	Arrestin Beta 2	Protein Coding	P32121	54	GC17P111039	4.34367	https://www.genecards.org/cgi-bin/carddisp.pl?gene=ARRB2
RYR1	Ryanodine Receptor 1	Protein Coding	P21817	56	GC19P113006	4.34153	https://www.genecards.org/cgi-bin/carddisp.pl?gene=RYR1
VDAC1	Voltage Dependent Anion Channel 1	Protein Coding	P21796	54	GC05M133975	4.33965	https://www.genecards.org/cgi-bin/carddisp.pl?gene=VDAC1
CCR7	C-C Motif Chemokine Receptor 7	Protein Coding	P32248	53	GC17M077631	4.33809	https://www.genecards.org/cgi-bin/carddisp.pl?gene=CCR7
ICAM3	Intercellular Adhesion Molecule 3	Protein Coding	P32942	50	GC19M092063	4.33376	https://www.genecards.org/cgi-bin/carddisp.pl?gene=ICAM3
TNFRSF8	TNF Receptor Superfamily Member 8	Protein Coding	P28908	52	GC01P012063	4.33322	https://www.genecards.org/cgi-bin/carddisp.pl?gene=TNFRSF8
GJB1	Gap Junction Protein Beta 1	Protein Coding	P08034	55	GC0XP071212	4.33142	https://www.genecards.org/cgi-bin/carddisp.pl?gene=GJB1
ATP6V1G2	ATPase H+ Transporting V1 Subunit G2	Protein Coding	O95670	43	GC06M093782	4.32961	https://www.genecards.org/cgi-bin/carddisp.pl?gene=ATP6V1G2
FGF3	Fibroblast Growth Factor 3	Protein Coding	P11487	53	GC11M125588	4.32446	https://www.genecards.org/cgi-bin/carddisp.pl?gene=FGF3
PSMA6	Proteasome 20S Subunit Alpha 6	Protein Coding	P60900	54	GC14P035278	4.32047	https://www.genecards.org/cgi-bin/carddisp.pl?gene=PSMA6
DLG5	Discs Large MAGUK Scaffold Protein 5	Protein Coding	Q8TDM6	47	GC10M077790	4.31972	https://www.genecards.org/cgi-bin/carddisp.pl?gene=DLG5
MIR154	MicroRNA 154	RNA Gene		27	GC14P116742	4.3145	https://www.genecards.org/cgi-bin/carddisp.pl?gene=MIR154
LOC110806262	Solute Carrier Family 6 Member 4 Gene Promoter	Functional Element		9	GC17P030235	4.31103	https://www.genecards.org/cgi-bin/carddisp.pl?gene=LOC110806262
IFNAR1	Interferon Alpha And Beta Receptor Subunit 1	Protein Coding	P17181	57	GC21P033324	4.31093	https://www.genecards.org/cgi-bin/carddisp.pl?gene=IFNAR1
HTRA1	HtrA Serine Peptidase 1	Protein Coding	Q92743	54	GC10P122461	4.30717	https://www.genecards.org/cgi-bin/carddisp.pl?gene=HTRA1
FABP6	Fatty Acid Binding Protein 6	Protein Coding	P51161	50	GC05P160187	4.3059	https://www.genecards.org/cgi-bin/carddisp.pl?gene=FABP6
SLC34A1	Solute Carrier Family 34 Member 1	Protein Coding	Q06495	53	GC05P186655	4.3047	https://www.genecards.org/cgi-bin/carddisp.pl?gene=SLC34A1
HOXA13	Homeobox A13	Protein Coding	P31271	49	GC07M028017	4.30038	https://www.genecards.org/cgi-bin/carddisp.pl?gene=HOXA13
DLD	Dihydrolipoamide Dehydrogenase	Protein Coding	P09622	56	GC07P107906	4.29794	https://www.genecards.org/cgi-bin/carddisp.pl?gene=DLD
ANG	Angiogenin	Protein Coding	P03950	53	GC14P045735	4.29288	https://www.genecards.org/cgi-bin/carddisp.pl?gene=ANG
LITAF	Lipopolysaccharide Induced TNF Factor	Protein Coding	Q99732	51	GC16M011547	4.29126	https://www.genecards.org/cgi-bin/carddisp.pl?gene=LITAF
KRT3	Keratin 3	Protein Coding	P12035	47	GC12M052789	4.29001	https://www.genecards.org/cgi-bin/carddisp.pl?gene=KRT3
MMP26	Matrix Metallopeptidase 26	Protein Coding	Q9NRE1	45	GC11P010832	4.28806	https://www.genecards.org/cgi-bin/carddisp.pl?gene=MMP26
EIF2AK2	Eukaryotic Translation Initiation Factor 2 Alpha Kinase 2	Protein Coding	P19525	59	GC02M037099	4.28746	https://www.genecards.org/cgi-bin/carddisp.pl?gene=EIF2AK2
TCF19	Transcription Factor 19	Protein Coding	Q9Y242	43	GC06P134809	4.28728	https://www.genecards.org/cgi-bin/carddisp.pl?gene=TCF19
CCL17	C-C Motif Chemokine Ligand 17	Protein Coding	Q92583	48	GC16P082516	4.28567	https://www.genecards.org/cgi-bin/carddisp.pl?gene=CCL17
AKR1A1	Aldo-Keto Reductase Family 1 Member A1	Protein Coding	P14550	53	GC01P045550	4.28159	https://www.genecards.org/cgi-bin/carddisp.pl?gene=AKR1A1
SRSF6	Serine And Arginine Rich Splicing Factor 6	Protein Coding	Q13247	49	GC20P043457	4.27162	https://www.genecards.org/cgi-bin/carddisp.pl?gene=SRSF6
UGT1A1	UDP Glucuronosyltransferase Family 1 Member A1	Protein Coding	P22309	59	GC02P233760	4.26842	https://www.genecards.org/cgi-bin/carddisp.pl?gene=UGT1A1
DKC1	Dyskerin Pseudouridine Synthase 1	Protein Coding	O60832	55	GC0XP154762	4.26817	https://www.genecards.org/cgi-bin/carddisp.pl?gene=DKC1
ABCC6	ATP Binding Cassette Subfamily C Member 6	Protein Coding	O95255	56	GC16M020960	4.26267	https://www.genecards.org/cgi-bin/carddisp.pl?gene=ABCC6
IHH	Indian Hedgehog Signaling Molecule	Protein Coding	Q14623	55	GC02M219054	4.26039	https://www.genecards.org/cgi-bin/carddisp.pl?gene=IHH
HCCAT5	Hepatocellular Carcinoma Associated Transcript 5	RNA Gene		23	GC16P073092	4.25828	https://www.genecards.org/cgi-bin/carddisp.pl?gene=HCCAT5
CISD3	CDGSH Iron Sulfur Domain 3	Protein Coding	P0C7P0	37	GC17P038730	4.25471	https://www.genecards.org/cgi-bin/carddisp.pl?gene=CISD3
HTR1A	5-Hydroxytryptamine Receptor 1A	Protein Coding	P08908	55	GC05M063960	4.25466	https://www.genecards.org/cgi-bin/carddisp.pl?gene=HTR1A
CD19	CD19 Molecule	Protein Coding	P15391	60	GC16P081418	4.25318	https://www.genecards.org/cgi-bin/carddisp.pl?gene=CD19
DCN	Decorin	Protein Coding	P07585	56	GC12M091140	4.2516	https://www.genecards.org/cgi-bin/carddisp.pl?gene=DCN
TLR6	Toll Like Receptor 6	Protein Coding	Q9Y2C9	54	GC04M038828	4.24685	https://www.genecards.org/cgi-bin/carddisp.pl?gene=TLR6
LCK	LCK Proto-Oncogene, Src Family Tyrosine Kinase	Protein Coding	P06239	60	GC01P032251	4.24557	https://www.genecards.org/cgi-bin/carddisp.pl?gene=LCK
ASIP	Agouti Signaling Protein	Protein Coding	P42127	46	GC20P040795	4.24503	https://www.genecards.org/cgi-bin/carddisp.pl?gene=ASIP
MIR628	MicroRNA 628	RNA Gene		23	GC15M055372	4.24096	https://www.genecards.org/cgi-bin/carddisp.pl?gene=MIR628
CD1C	CD1c Molecule	Protein Coding	P29017	45	GC01P158289	4.23656	https://www.genecards.org/cgi-bin/carddisp.pl?gene=CD1C
UBE2L3	Ubiquitin Conjugating Enzyme E2 L3	Protein Coding	P68036	54	GC22P021549	4.23002	https://www.genecards.org/cgi-bin/carddisp.pl?gene=UBE2L3
BEST1	Bestrophin 1	Protein Coding	O76090	51	GC11P061949	4.22413	https://www.genecards.org/cgi-bin/carddisp.pl?gene=BEST1
ATP1A1	ATPase Na+/K+ Transporting Subunit Alpha 1	Protein Coding	P05023	58	GC01P116372	4.21947	https://www.genecards.org/cgi-bin/carddisp.pl?gene=ATP1A1
MIR370	MicroRNA 370	RNA Gene		27	GC14P115745	4.21792	https://www.genecards.org/cgi-bin/carddisp.pl?gene=MIR370
GNAQ	G Protein Subunit Alpha Q	Protein Coding	P50148	58	GC09M077716	4.21432	https://www.genecards.org/cgi-bin/carddisp.pl?gene=GNAQ
MIR498	MicroRNA 498	RNA Gene		23	GC19P113645	4.21187	https://www.genecards.org/cgi-bin/carddisp.pl?gene=MIR498
CAPSL	Calcyphosine Like	Protein Coding	Q8WWF8	40	GC05M036270	4.21077	https://www.genecards.org/cgi-bin/carddisp.pl?gene=CAPSL
FANCA	FA Complementation Group A	Protein Coding	O15360	59	GC16M090078	4.20744	https://www.genecards.org/cgi-bin/carddisp.pl?gene=FANCA
CXCL16	C-X-C Motif Chemokine Ligand 16	Protein Coding	Q9H2A7	47	GC17M004733	4.20381	https://www.genecards.org/cgi-bin/carddisp.pl?gene=CXCL16
MIR138-1	MicroRNA 138-1	RNA Gene		25	GC03P044115	4.20209	https://www.genecards.org/cgi-bin/carddisp.pl?gene=MIR138-1
CD1B	CD1b Molecule	Protein Coding	P29016	46	GC01M161284	4.20134	https://www.genecards.org/cgi-bin/carddisp.pl?gene=CD1B
LPIN2	Lipin 2	Protein Coding	Q92539	48	GC18M003755	4.19329	https://www.genecards.org/cgi-bin/carddisp.pl?gene=LPIN2
MIR152	MicroRNA 152	RNA Gene		27	GC17M048037	4.19314	https://www.genecards.org/cgi-bin/carddisp.pl?gene=MIR152
A2M	Alpha-2-Macroglobulin	Protein Coding	P01023	55	GC12M009067	4.18075	https://www.genecards.org/cgi-bin/carddisp.pl?gene=A2M
PPBP	Pro-Platelet Basic Protein	Protein Coding	P02775	52	GC04M073986	4.17137	https://www.genecards.org/cgi-bin/carddisp.pl?gene=PPBP
SLC7A1	Solute Carrier Family 7 Member 1	Protein Coding	P30825	50	GC13M029509	4.1686	https://www.genecards.org/cgi-bin/carddisp.pl?gene=SLC7A1
FDX2	Ferredoxin 2	Protein Coding	Q6P4F2	41	GC19M092062	4.16439	https://www.genecards.org/cgi-bin/carddisp.pl?gene=FDX2
CFI	Complement Factor I	Protein Coding	P05156	55	GC04M109732	4.16381	https://www.genecards.org/cgi-bin/carddisp.pl?gene=CFI
MIR125B2	MicroRNA 125b-2	RNA Gene		26	GC21P016590	4.16277	https://www.genecards.org/cgi-bin/carddisp.pl?gene=MIR125B2
MIR9-2	MicroRNA 9-2	RNA Gene		24	GC05M088666	4.15853	https://www.genecards.org/cgi-bin/carddisp.pl?gene=MIR9-2
RAB7A	RAB7A, Member RAS Oncogene Family	Protein Coding	P51149	56	GC03P138990	4.15784	https://www.genecards.org/cgi-bin/carddisp.pl?gene=RAB7A
WAS	WASP Actin Nucleation Promoting Factor	Protein Coding	P42768	55	GC0XP048676	4.15754	https://www.genecards.org/cgi-bin/carddisp.pl?gene=WAS
AREG	Amphiregulin	Protein Coding	P15514	52	GC04P074445	4.15583	https://www.genecards.org/cgi-bin/carddisp.pl?gene=AREG
MIR30C1	MicroRNA 30c-1	RNA Gene		27	GC01P040757	4.15558	https://www.genecards.org/cgi-bin/carddisp.pl?gene=MIR30C1
HLA-DRB6	Major Histocompatibility Complex, Class II, DR Beta 6 (Pseudogene)	Pseudogene		16	GC06M093832	4.15417	https://www.genecards.org/cgi-bin/carddisp.pl?gene=HLA-DRB6
BDKRB1	Bradykinin Receptor B1	Protein Coding	P46663	50	GC14P096336	4.14947	https://www.genecards.org/cgi-bin/carddisp.pl?gene=BDKRB1
KRBOX4	KRAB Box Domain Containing 4	Protein Coding	Q5JUW0	37	GC0XP046987	4.14799	https://www.genecards.org/cgi-bin/carddisp.pl?gene=KRBOX4
ROCR	Regulator Of Chondrogenesis RNA	RNA Gene		17	GC17M078907	4.14352	https://www.genecards.org/cgi-bin/carddisp.pl?gene=ROCR
MIR196B	MicroRNA 196b	RNA Gene		27	GC07M027997	4.1432	https://www.genecards.org/cgi-bin/carddisp.pl?gene=MIR196B
IVL	Involucrin	Protein Coding	P07476	47	GC01P164418	4.14283	https://www.genecards.org/cgi-bin/carddisp.pl?gene=IVL
NDUFS2	NADH:Ubiquinone Oxidoreductase Core Subunit S2	Protein Coding	O75306	52	GC01P161197	4.14124	https://www.genecards.org/cgi-bin/carddisp.pl?gene=NDUFS2
AUTS2	Activator Of Transcription And Developmental Regulator AUTS2	Protein Coding	Q8WXX7	51	GC07P069598	4.13875	https://www.genecards.org/cgi-bin/carddisp.pl?gene=AUTS2
RPGR	Retinitis Pigmentosa GTPase Regulator	Protein Coding	Q92834	51	GC0XM038269	4.13621	https://www.genecards.org/cgi-bin/carddisp.pl?gene=RPGR
MT-RNR2	Mitochondrially Encoded 16S RRNA	RNA Gene	Q8IVG9	25	GCMTP000953	4.13595	https://www.genecards.org/cgi-bin/carddisp.pl?gene=MT-RNR2
GSN	Gelsolin	Protein Coding	P06396	58	GC09P121201	4.13513	https://www.genecards.org/cgi-bin/carddisp.pl?gene=GSN
LOC110006319	Beta-Globin Gene 3' Regulatory Region	Functional Element		10	GC11P005223	4.1351	https://www.genecards.org/cgi-bin/carddisp.pl?gene=LOC110006319
GNRHR	Gonadotropin Releasing Hormone Receptor	Protein Coding	P30968	56	GC04M067737	4.13076	https://www.genecards.org/cgi-bin/carddisp.pl?gene=GNRHR
MIR422A	MicroRNA 422a	RNA Gene		24	GC15M063870	4.13075	https://www.genecards.org/cgi-bin/carddisp.pl?gene=MIR422A
SLC47A1	Solute Carrier Family 47 Member 1	Protein Coding	Q96FL8	44	GC17P019495	4.12818	https://www.genecards.org/cgi-bin/carddisp.pl?gene=SLC47A1
GLP2R	Glucagon Like Peptide 2 Receptor	Protein Coding	O95838	51	GC17P009822	4.12777	https://www.genecards.org/cgi-bin/carddisp.pl?gene=GLP2R
VIPR1	Vasoactive Intestinal Peptide Receptor 1	Protein Coding	P32241	55	GC03P042490	4.1257	https://www.genecards.org/cgi-bin/carddisp.pl?gene=VIPR1
ALDOB	Aldolase, Fructose-Bisphosphate B	Protein Coding	P05062	54	GC09M101420	4.12331	https://www.genecards.org/cgi-bin/carddisp.pl?gene=ALDOB
ALPP	Alkaline Phosphatase, Placental	Protein Coding	P05187	53	GC02P232378	4.12316	https://www.genecards.org/cgi-bin/carddisp.pl?gene=ALPP
TMPO	Thymopoietin	Protein Coding	P42166	55	GC12P098515	4.11631	https://www.genecards.org/cgi-bin/carddisp.pl?gene=TMPO
KRT16	Keratin 16	Protein Coding	P08779	51	GC17M041609	4.11516	https://www.genecards.org/cgi-bin/carddisp.pl?gene=KRT16
SCN1A-AS1	SCN1A And SCN9A Antisense RNA 1	RNA Gene		23	GC02P165959	4.10794	https://www.genecards.org/cgi-bin/carddisp.pl?gene=SCN1A-AS1
SCNN1A	Sodium Channel Epithelial 1 Subunit Alpha	Protein Coding	P37088	58	GC12M006346	4.10484	https://www.genecards.org/cgi-bin/carddisp.pl?gene=SCNN1A
CD1E	CD1e Molecule	Protein Coding	P15812	45	GC01P164756	4.10335	https://www.genecards.org/cgi-bin/carddisp.pl?gene=CD1E
SLX1A-SULT1A3	SLX1A-SULT1A3 Readthrough (NMD Candidate)	RNA Gene		18	GC16P081596	4.10231	https://www.genecards.org/cgi-bin/carddisp.pl?gene=SLX1A-SULT1A3
LRG1	Leucine Rich Alpha-2-Glycoprotein 1	Protein Coding	P02750	47	GC19M091832	4.10117	https://www.genecards.org/cgi-bin/carddisp.pl?gene=LRG1
MDK	Midkine	Protein Coding	P21741	51	GC11P046380	4.09855	https://www.genecards.org/cgi-bin/carddisp.pl?gene=MDK
HCG18	HLA Complex Group 18	RNA Gene		18	GC06M093690	4.09682	https://www.genecards.org/cgi-bin/carddisp.pl?gene=HCG18
CAPN2	Calpain 2	Protein Coding	P17655	56	GC01P223701	4.09492	https://www.genecards.org/cgi-bin/carddisp.pl?gene=CAPN2
NRG1	Neuregulin 1	Protein Coding	Q02297	58	GC08P031639	4.0921	https://www.genecards.org/cgi-bin/carddisp.pl?gene=NRG1
IL1F10	Interleukin 1 Family Member 10	Protein Coding	Q8WWZ1	46	GC02P113067	4.08702	https://www.genecards.org/cgi-bin/carddisp.pl?gene=IL1F10
ANPEP	Alanyl Aminopeptidase, Membrane	Protein Coding	P15144	58	GC15M089784	4.08108	https://www.genecards.org/cgi-bin/carddisp.pl?gene=ANPEP
DAXX	Death Domain Associated Protein	Protein Coding	Q9UER7	52	GC06M033318	4.08041	https://www.genecards.org/cgi-bin/carddisp.pl?gene=DAXX
ZEB1-AS1	ZEB1 Antisense RNA 1	RNA Gene		25	GC10M031166	4.07868	https://www.genecards.org/cgi-bin/carddisp.pl?gene=ZEB1-AS1
SCTR	Secretin Receptor	Protein Coding	P47872	49	GC02M119439	4.07859	https://www.genecards.org/cgi-bin/carddisp.pl?gene=SCTR
ARL6IP6	ADP Ribosylation Factor Like GTPase 6 Interacting Protein 6	Protein Coding	Q8N6S5	41	GC02P152717	4.07688	https://www.genecards.org/cgi-bin/carddisp.pl?gene=ARL6IP6
DNMT3B	DNA Methyltransferase 3 Beta	Protein Coding	Q9UBC3	60	GC20P032762	4.07602	https://www.genecards.org/cgi-bin/carddisp.pl?gene=DNMT3B
DMBT1	Deleted In Malignant Brain Tumors 1	Protein Coding	Q9UGM3	48	GC10P122560	4.07587	https://www.genecards.org/cgi-bin/carddisp.pl?gene=DMBT1
IFNGR2	Interferon Gamma Receptor 2	Protein Coding	P38484	53	GC21P033402	4.07374	https://www.genecards.org/cgi-bin/carddisp.pl?gene=IFNGR2
CMA1	Chymase 1	Protein Coding	P23946	52	GC14M027103	4.07334	https://www.genecards.org/cgi-bin/carddisp.pl?gene=CMA1
LGALS9	Galectin 9	Protein Coding	O00182	47	GC17P027629	4.07244	https://www.genecards.org/cgi-bin/carddisp.pl?gene=LGALS9
TRAP1	TNF Receptor Associated Protein 1	Protein Coding	Q12931	49	GC16M020486	4.07054	https://www.genecards.org/cgi-bin/carddisp.pl?gene=TRAP1
IL16	Interleukin 16	Protein Coding	Q14005	50	GC15P081159	4.06994	https://www.genecards.org/cgi-bin/carddisp.pl?gene=IL16
EFNB2	Ephrin B2	Protein Coding	P52799	52	GC13M106489	4.06688	https://www.genecards.org/cgi-bin/carddisp.pl?gene=EFNB2
WWOX	WW Domain Containing Oxidoreductase	Protein Coding	Q9NZC7	54	GC16P078099	4.06598	https://www.genecards.org/cgi-bin/carddisp.pl?gene=WWOX
CHRM3	Cholinergic Receptor Muscarinic 3	Protein Coding	P20309	57	GC01P239386	4.0638	https://www.genecards.org/cgi-bin/carddisp.pl?gene=CHRM3
HAGLR	HOXD Antisense Growth-Associated Long Non-Coding RNA	RNA Gene		25	GC02M176172	4.05919	https://www.genecards.org/cgi-bin/carddisp.pl?gene=HAGLR
C2	Complement C2	Protein Coding	P06681	54	GC06P031897	4.05873	https://www.genecards.org/cgi-bin/carddisp.pl?gene=C2
EGFR-AS1	EGFR Antisense RNA 1	RNA Gene		23	GC07M055179	4.05849	https://www.genecards.org/cgi-bin/carddisp.pl?gene=EGFR-AS1
SOX4	SRY-Box Transcription Factor 4	Protein Coding	Q06945	52	GC06P021593	4.05641	https://www.genecards.org/cgi-bin/carddisp.pl?gene=SOX4
ITGA6	Integrin Subunit Alpha 6	Protein Coding	P23229	58	GC02P172427	4.05298	https://www.genecards.org/cgi-bin/carddisp.pl?gene=ITGA6
ABCC1	ATP Binding Cassette Subfamily C Member 1 (ABCC1 Blood Group)	Protein Coding	P33527	56	GC16P015949	4.05292	https://www.genecards.org/cgi-bin/carddisp.pl?gene=ABCC1
H2AX	H2A.X Variant Histone	Protein Coding	P16104	53	GC11M126556	4.05132	https://www.genecards.org/cgi-bin/carddisp.pl?gene=H2AX
NR5A1	Nuclear Receptor Subfamily 5 Group A Member 1	Protein Coding	Q13285	58	GC09M124481	4.04523	https://www.genecards.org/cgi-bin/carddisp.pl?gene=NR5A1
HLA-DQB2	Major Histocompatibility Complex, Class II, DQ Beta 2	Protein Coding	P05538	45	GC06M032756	4.04208	https://www.genecards.org/cgi-bin/carddisp.pl?gene=HLA-DQB2
HRG	Histidine Rich Glycoprotein	Protein Coding	P04196	52	GC03P186660	4.04192	https://www.genecards.org/cgi-bin/carddisp.pl?gene=HRG
EZH2	Enhancer Of Zeste 2 Polycomb Repressive Complex 2 Subunit	Protein Coding	Q15910	61	GC07M148807	4.0401	https://www.genecards.org/cgi-bin/carddisp.pl?gene=EZH2
MUC3A	Mucin 3A, Cell Surface Associated	Protein Coding	Q02505	43	GC07P100949	4.03636	https://www.genecards.org/cgi-bin/carddisp.pl?gene=MUC3A
EPOR	Erythropoietin Receptor	Protein Coding	P19235	56	GC19M011377	4.0354	https://www.genecards.org/cgi-bin/carddisp.pl?gene=EPOR
SATB2	SATB Homeobox 2	Protein Coding	Q9UPW6	54	GC02M199269	4.03137	https://www.genecards.org/cgi-bin/carddisp.pl?gene=SATB2
PLCG2	Phospholipase C Gamma 2	Protein Coding	P16885	60	GC16P081779	4.031	https://www.genecards.org/cgi-bin/carddisp.pl?gene=PLCG2
MRC1	Mannose Receptor C-Type 1	Protein Coding	P22897	48	GC10P017809	4.02876	https://www.genecards.org/cgi-bin/carddisp.pl?gene=MRC1
VEGFD	Vascular Endothelial Growth Factor D	Protein Coding	O43915	49	GC0XM015345	4.0275	https://www.genecards.org/cgi-bin/carddisp.pl?gene=VEGFD
CDK1	Cyclin Dependent Kinase 1	Protein Coding	P06493	56	GC10P060772	4.02746	https://www.genecards.org/cgi-bin/carddisp.pl?gene=CDK1
KIR2DS2	Killer Cell Immunoglobulin Like Receptor, Two Ig Domains And Short Cytoplasmic Tail 2	Protein Coding	P43631	26	GC19Mr00125	4.0262	https://www.genecards.org/cgi-bin/carddisp.pl?gene=KIR2DS2
NLRP5	NLR Family Pyrin Domain Containing 5	Protein Coding	P59047	48	GC19P113736	4.02584	https://www.genecards.org/cgi-bin/carddisp.pl?gene=NLRP5
CCAT2	Colon Cancer Associated Transcript 2	RNA Gene		20	GC08P127400	4.02277	https://www.genecards.org/cgi-bin/carddisp.pl?gene=CCAT2
TLR1	Toll Like Receptor 1	Protein Coding	Q15399	57	GC04M038793	4.0175	https://www.genecards.org/cgi-bin/carddisp.pl?gene=TLR1
TM6SF2	Transmembrane 6 Superfamily Member 2	Protein Coding	Q9BZW4	39	GC19M019264	4.01645	https://www.genecards.org/cgi-bin/carddisp.pl?gene=TM6SF2
PWAR4	Prader Willi/Angelman Region RNA 4	RNA Gene		15	GC15P025211	4.01436	https://www.genecards.org/cgi-bin/carddisp.pl?gene=PWAR4
NT5E	5'-Nucleotidase Ecto	Protein Coding	P21589	60	GC06P085449	4.01431	https://www.genecards.org/cgi-bin/carddisp.pl?gene=NT5E
DAB2	DAB Adaptor Protein 2	Protein Coding	P98082	51	GC05M039371	4.00684	https://www.genecards.org/cgi-bin/carddisp.pl?gene=DAB2
FUT3	Fucosyltransferase 3 (Lewis Blood Group)	Protein Coding	P21217	48	GC19M091872	4.00543	https://www.genecards.org/cgi-bin/carddisp.pl?gene=FUT3
CCHCR1	Coiled-Coil Alpha-Helical Rod Protein 1	Protein Coding	Q8TD31	46	GC06M093728	4.00248	https://www.genecards.org/cgi-bin/carddisp.pl?gene=CCHCR1
ACTC1	Actin Alpha Cardiac Muscle 1	Protein Coding	P68032	53	GC15M034790	3.99652	https://www.genecards.org/cgi-bin/carddisp.pl?gene=ACTC1
HLA-DRB4	Major Histocompatibility Complex, Class II, DR Beta 4	Protein Coding	P13762	36	GC06Mo03851	3.99481	https://www.genecards.org/cgi-bin/carddisp.pl?gene=HLA-DRB4
CYP2J2	Cytochrome P450 Family 2 Subfamily J Member 2	Protein Coding	P51589	47	GC01M059893	3.9918	https://www.genecards.org/cgi-bin/carddisp.pl?gene=CYP2J2
EDA	Ectodysplasin A	Protein Coding	Q92838	51	GC0XP069618	3.99013	https://www.genecards.org/cgi-bin/carddisp.pl?gene=EDA
HLA-DRB3	Major Histocompatibility Complex, Class II, DR Beta 3	Protein Coding	P79483	33	GC06Mn03715	3.98986	https://www.genecards.org/cgi-bin/carddisp.pl?gene=HLA-DRB3
SMARCA4	SWI/SNF Related, Matrix Associated, Actin Dependent Regulator Of Chromatin, Subfamily A, Member 4	Protein Coding	P51532	60	GC19P112312	3.98719	https://www.genecards.org/cgi-bin/carddisp.pl?gene=SMARCA4
ATF2	Activating Transcription Factor 2	Protein Coding	P15336	54	GC02M175072	3.98551	https://www.genecards.org/cgi-bin/carddisp.pl?gene=ATF2
ABL1	ABL Proto-Oncogene 1, Non-Receptor Tyrosine Kinase	Protein Coding	P00519	61	GC09P130713	3.98455	https://www.genecards.org/cgi-bin/carddisp.pl?gene=ABL1
DMRTA1	DMRT Like Family A1	Protein Coding	Q5VZB9	43	GC09P022436	3.98292	https://www.genecards.org/cgi-bin/carddisp.pl?gene=DMRTA1
MIR518D	MicroRNA 518d	RNA Gene		20	GC19P053734	3.97893	https://www.genecards.org/cgi-bin/carddisp.pl?gene=MIR518D
DGUOK	Deoxyguanosine Kinase	Protein Coding	Q16854	52	GC02P073926	3.97636	https://www.genecards.org/cgi-bin/carddisp.pl?gene=DGUOK
ADH1C	Alcohol Dehydrogenase 1C (Class I), Gamma Polypeptide	Protein Coding	P00326	50	GC04M099336	3.97282	https://www.genecards.org/cgi-bin/carddisp.pl?gene=ADH1C
KLF5	KLF Transcription Factor 5	Protein Coding	Q13887	53	GC13P073054	3.97241	https://www.genecards.org/cgi-bin/carddisp.pl?gene=KLF5
PLCG1	Phospholipase C Gamma 1	Protein Coding	P19174	56	GC20P041136	3.97098	https://www.genecards.org/cgi-bin/carddisp.pl?gene=PLCG1
FOXP2	Forkhead Box P2	Protein Coding	O15409	53	GC07P114086	3.96929	https://www.genecards.org/cgi-bin/carddisp.pl?gene=FOXP2
FLVCR1	FLVCR Choline And Heme Transporter 1	Protein Coding	Q9Y5Y0	48	GC01P212858	3.96505	https://www.genecards.org/cgi-bin/carddisp.pl?gene=FLVCR1
MEST	Mesoderm Specific Transcript	Protein Coding	Q5EB52	47	GC07P130486	3.96405	https://www.genecards.org/cgi-bin/carddisp.pl?gene=MEST
CASP10	Caspase 10	Protein Coding	Q92851	56	GC02P201182	3.96077	https://www.genecards.org/cgi-bin/carddisp.pl?gene=CASP10
GAS6	Growth Arrest Specific 6	Protein Coding	Q14393	52	GC13M113820	3.96049	https://www.genecards.org/cgi-bin/carddisp.pl?gene=GAS6
EFEMP1	EGF Containing Fibulin Extracellular Matrix Protein 1	Protein Coding	Q12805	52	GC02M055865	3.95946	https://www.genecards.org/cgi-bin/carddisp.pl?gene=EFEMP1
EDNRB	Endothelin Receptor Type B	Protein Coding	P24530	59	GC13M077895	3.95451	https://www.genecards.org/cgi-bin/carddisp.pl?gene=EDNRB
CALM3	Calmodulin 3	Protein Coding	P0DP25	51	GC19P046601	3.95205	https://www.genecards.org/cgi-bin/carddisp.pl?gene=CALM3
LOC111365141	NOS2 5' Regulatory Region	Functional Element		8	GC17P027800	3.94592	https://www.genecards.org/cgi-bin/carddisp.pl?gene=LOC111365141
PRPF6	Pre-MRNA Processing Factor 6	Protein Coding	O94906	49	GC20P063981	3.94566	https://www.genecards.org/cgi-bin/carddisp.pl?gene=PRPF6
SPI1	Spi-1 Proto-Oncogene	Protein Coding	P17947	51	GC11M125006	3.94528	https://www.genecards.org/cgi-bin/carddisp.pl?gene=SPI1
NR4A3	Nuclear Receptor Subfamily 4 Group A Member 3	Protein Coding	Q92570	49	GC09P099821	3.94461	https://www.genecards.org/cgi-bin/carddisp.pl?gene=NR4A3
PADI4	Peptidyl Arginine Deiminase 4	Protein Coding	Q9UM07	54	GC01P017308	3.94386	https://www.genecards.org/cgi-bin/carddisp.pl?gene=PADI4
FLT3	Fms Related Receptor Tyrosine Kinase 3	Protein Coding	P36888	61	GC13M028003	3.94079	https://www.genecards.org/cgi-bin/carddisp.pl?gene=FLT3
CTBP1	C-Terminal Binding Protein 1	Protein Coding	Q13363	55	GC04M001211	3.93892	https://www.genecards.org/cgi-bin/carddisp.pl?gene=CTBP1
PTGES	Prostaglandin E Synthase	Protein Coding	O14684	51	GC09M129738	3.93678	https://www.genecards.org/cgi-bin/carddisp.pl?gene=PTGES
OCRL	OCRL Inositol Polyphosphate-5-Phosphatase	Protein Coding	Q01968	53	GC0XP129539	3.93455	https://www.genecards.org/cgi-bin/carddisp.pl?gene=OCRL
CCL24	C-C Motif Chemokine Ligand 24	Protein Coding	O00175	47	GC07M078583	3.93176	https://www.genecards.org/cgi-bin/carddisp.pl?gene=CCL24
TNFSF13B	TNF Superfamily Member 13b	Protein Coding	Q9Y275	54	GC13P108251	3.92468	https://www.genecards.org/cgi-bin/carddisp.pl?gene=TNFSF13B
MIR501	MicroRNA 501	RNA Gene		23	GC0XP057621	3.92203	https://www.genecards.org/cgi-bin/carddisp.pl?gene=MIR501
CDC42	Cell Division Cycle 42	Protein Coding	P60953	59	GC01P022052	3.9195	https://www.genecards.org/cgi-bin/carddisp.pl?gene=CDC42
ADORA2A	Adenosine A2a Receptor	Protein Coding	P29274	55	GC22P024417	3.91795	https://www.genecards.org/cgi-bin/carddisp.pl?gene=ADORA2A
TSC1	TSC Complex Subunit 1	Protein Coding	Q92574	56	GC09M132891	3.9171	https://www.genecards.org/cgi-bin/carddisp.pl?gene=TSC1
NLRP7	NLR Family Pyrin Domain Containing 7	Protein Coding	Q8WX94	48	GC19M054923	3.91384	https://www.genecards.org/cgi-bin/carddisp.pl?gene=NLRP7
PNMT	Phenylethanolamine N-Methyltransferase	Protein Coding	P11086	52	GC17P039667	3.91333	https://www.genecards.org/cgi-bin/carddisp.pl?gene=PNMT
PROS1	Protein S	Protein Coding	P07225	57	GC03M093873	3.91187	https://www.genecards.org/cgi-bin/carddisp.pl?gene=PROS1
CAV3	Caveolin 3	Protein Coding	P56539	52	GC03P008733	3.90677	https://www.genecards.org/cgi-bin/carddisp.pl?gene=CAV3
PDGFRL	Platelet Derived Growth Factor Receptor Like	Protein Coding	Q15198	51	GC08P017576	3.9061	https://www.genecards.org/cgi-bin/carddisp.pl?gene=PDGFRL
RNU4ATAC	RNA, U4atac Small Nuclear	RNA Gene		27	GC02P143804	3.90414	https://www.genecards.org/cgi-bin/carddisp.pl?gene=RNU4ATAC
HBE1	Hemoglobin Subunit Epsilon 1	Protein Coding	P02100	46	GC11M005268	3.90382	https://www.genecards.org/cgi-bin/carddisp.pl?gene=HBE1
MIR379	MicroRNA 379	RNA Gene		23	GC14P116757	3.90358	https://www.genecards.org/cgi-bin/carddisp.pl?gene=MIR379
RNU7-1	RNA, U7 Small Nuclear 1	RNA Gene		20	GC12P038998	3.90037	https://www.genecards.org/cgi-bin/carddisp.pl?gene=RNU7-1
LST1	Leukocyte Specific Transcript 1	Protein Coding	O00453	43	GC06P134821	3.89958	https://www.genecards.org/cgi-bin/carddisp.pl?gene=LST1
SPRY2	Sprouty RTK Signaling Antagonist 2	Protein Coding	O43597	55	GC13M080335	3.89936	https://www.genecards.org/cgi-bin/carddisp.pl?gene=SPRY2
DSG3	Desmoglein 3	Protein Coding	P32926	49	GC18P031447	3.8986	https://www.genecards.org/cgi-bin/carddisp.pl?gene=DSG3
KRT1	Keratin 1	Protein Coding	P04264	56	GC12M052674	3.89789	https://www.genecards.org/cgi-bin/carddisp.pl?gene=KRT1
UGT1A7	UDP Glucuronosyltransferase Family 1 Member A7	Protein Coding	Q9HAW7	48	GC02P233681	3.89264	https://www.genecards.org/cgi-bin/carddisp.pl?gene=UGT1A7
CACNA1H	Calcium Voltage-Gated Channel Subunit Alpha1 H	Protein Coding	O95180	58	GC16P001153	3.89226	https://www.genecards.org/cgi-bin/carddisp.pl?gene=CACNA1H
TMEFF2	Transmembrane Protein With EGF Like And Two Follistatin Like Domains 2	Protein Coding	Q9UIK5	49	GC02M191950	3.89222	https://www.genecards.org/cgi-bin/carddisp.pl?gene=TMEFF2
SCN10A	Sodium Voltage-Gated Channel Alpha Subunit 10	Protein Coding	Q9Y5Y9	56	GC03M038714	3.89181	https://www.genecards.org/cgi-bin/carddisp.pl?gene=SCN10A
GLI3	GLI Family Zinc Finger 3	Protein Coding	P10071	58	GC07M041960	3.8808	https://www.genecards.org/cgi-bin/carddisp.pl?gene=GLI3
SERPINB1	Serpin Family B Member 1	Protein Coding	P30740	50	GC06M003730	3.87998	https://www.genecards.org/cgi-bin/carddisp.pl?gene=SERPINB1
SCNN1B	Sodium Channel Epithelial 1 Subunit Beta	Protein Coding	P51168	57	GC16P023278	3.87837	https://www.genecards.org/cgi-bin/carddisp.pl?gene=SCNN1B
NEFL	Neurofilament Light Chain	Protein Coding	P07196	54	GC08M024950	3.87343	https://www.genecards.org/cgi-bin/carddisp.pl?gene=NEFL
NCR3	Natural Cytotoxicity Triggering Receptor 3	Protein Coding	O14931	48	GC06M031588	3.87122	https://www.genecards.org/cgi-bin/carddisp.pl?gene=NCR3
HYOU1	Hypoxia Up-Regulated 1	Protein Coding	Q9Y4L1	53	GC11M126548	3.86737	https://www.genecards.org/cgi-bin/carddisp.pl?gene=HYOU1
GRN	Granulin Precursor	Protein Coding	P28799	56	GC17P044345	3.86728	https://www.genecards.org/cgi-bin/carddisp.pl?gene=GRN
LINC01475	Long Intergenic Non-Protein Coding RNA 1475	RNA Gene		13	GC10M099526	3.86439	https://www.genecards.org/cgi-bin/carddisp.pl?gene=LINC01475
MIR4435-2	MicroRNA 4435-2	RNA Gene		16	GC02M112986	3.86165	https://www.genecards.org/cgi-bin/carddisp.pl?gene=MIR4435-2
PGA3	Pepsinogen A3	Protein Coding	P0DJD8	41	GC11P061203	3.85757	https://www.genecards.org/cgi-bin/carddisp.pl?gene=PGA3
MIR328	MicroRNA 328	RNA Gene		27	GC16M067512	3.8558	https://www.genecards.org/cgi-bin/carddisp.pl?gene=MIR328
STAT2	Signal Transducer And Activator Of Transcription 2	Protein Coding	P52630	57	GC12M056341	3.85201	https://www.genecards.org/cgi-bin/carddisp.pl?gene=STAT2
PRPF3	Pre-MRNA Processing Factor 3	Protein Coding	O43395	51	GC01P150321	3.85031	https://www.genecards.org/cgi-bin/carddisp.pl?gene=PRPF3
CD58	CD58 Molecule	Protein Coding	P19256	50	GC01M116514	3.84798	https://www.genecards.org/cgi-bin/carddisp.pl?gene=CD58
RIPK2	Receptor Interacting Serine/Threonine Kinase 2	Protein Coding	O43353	54	GC08P089918	3.84723	https://www.genecards.org/cgi-bin/carddisp.pl?gene=RIPK2
ACVR2A	Activin A Receptor Type 2A	Protein Coding	P27037	54	GC02P147844	3.84202	https://www.genecards.org/cgi-bin/carddisp.pl?gene=ACVR2A
DNAJC21	DnaJ Heat Shock Protein Family (Hsp40) Member C21	Protein Coding	Q5F1R6	44	GC05P034929	3.84097	https://www.genecards.org/cgi-bin/carddisp.pl?gene=DNAJC21
MACF1	Microtubule Actin Crosslinking Factor 1	Protein Coding	O94854	50	GC01P043903	3.83879	https://www.genecards.org/cgi-bin/carddisp.pl?gene=MACF1
ARNT	Aryl Hydrocarbon Receptor Nuclear Translocator	Protein Coding	P27540	54	GC01M150809	3.83702	https://www.genecards.org/cgi-bin/carddisp.pl?gene=ARNT
ADAM30	ADAM Metallopeptidase Domain 30	Protein Coding	Q9UKF2	41	GC01M119893	3.83487	https://www.genecards.org/cgi-bin/carddisp.pl?gene=ADAM30
MIR503	MicroRNA 503	RNA Gene		26	GC0XM134752	3.83399	https://www.genecards.org/cgi-bin/carddisp.pl?gene=MIR503
FOXE1	Forkhead Box E1	Protein Coding	O00358	49	GC09P097853	3.83369	https://www.genecards.org/cgi-bin/carddisp.pl?gene=FOXE1
FOXF1	Forkhead Box F1	Protein Coding	Q12946	49	GC16P086510	3.8316	https://www.genecards.org/cgi-bin/carddisp.pl?gene=FOXF1
NR4A1	Nuclear Receptor Subfamily 4 Group A Member 1	Protein Coding	P22736	55	GC12P052022	3.82196	https://www.genecards.org/cgi-bin/carddisp.pl?gene=NR4A1
TRPV3	Transient Receptor Potential Cation Channel Subfamily V Member 3	Protein Coding	Q8NET8	52	GC17M074569	3.82186	https://www.genecards.org/cgi-bin/carddisp.pl?gene=TRPV3
FBP1	Fructose-Bisphosphatase 1	Protein Coding	P09467	56	GC09M094603	3.81897	https://www.genecards.org/cgi-bin/carddisp.pl?gene=FBP1
SEC61A1	SEC61 Translocon Subunit Alpha 1	Protein Coding	P61619	52	GC03P128051	3.8066	https://www.genecards.org/cgi-bin/carddisp.pl?gene=SEC61A1
TRE-TTC3-1	TRNA-Glu (Anticodon TTC) 3-1	RNA Gene		17	GC01P041019	3.79501	https://www.genecards.org/cgi-bin/carddisp.pl?gene=TRE-TTC3-1
LSM2	LSM2 Homolog, U6 Small Nuclear RNA And MRNA Degradation Associated	Protein Coding	Q9Y333	48	GC06M093799	3.79497	https://www.genecards.org/cgi-bin/carddisp.pl?gene=LSM2
NPC1	NPC Intracellular Cholesterol Transporter 1	Protein Coding	O15118	59	GC18M023506	3.79408	https://www.genecards.org/cgi-bin/carddisp.pl?gene=NPC1
SAA4	Serum Amyloid A4, Constitutive	Protein Coding	P35542	47	GC11M018234	3.79247	https://www.genecards.org/cgi-bin/carddisp.pl?gene=SAA4
DDAH1	Dimethylarginine Dimethylaminohydrolase 1	Protein Coding	O94760	50	GC01M085318	3.79112	https://www.genecards.org/cgi-bin/carddisp.pl?gene=DDAH1
VWA2	Von Willebrand Factor A Domain Containing 2	Protein Coding	Q5GFL6	44	GC10P114239	3.78999	https://www.genecards.org/cgi-bin/carddisp.pl?gene=VWA2
KLF1	KLF Transcription Factor 1	Protein Coding	Q13351	51	GC19M012884	3.78967	https://www.genecards.org/cgi-bin/carddisp.pl?gene=KLF1
ACSM3	Acyl-CoA Synthetase Medium Chain Family Member 3	Protein Coding	Q53FZ2	45	GC16P020610	3.7833	https://www.genecards.org/cgi-bin/carddisp.pl?gene=ACSM3
NAA10	N-Alpha-Acetyltransferase 10, NatA Catalytic Subunit	Protein Coding	P41227	54	GC0XM153929	3.77633	https://www.genecards.org/cgi-bin/carddisp.pl?gene=NAA10
FABP5	Fatty Acid Binding Protein 5	Protein Coding	Q01469	50	GC08P081282	3.77447	https://www.genecards.org/cgi-bin/carddisp.pl?gene=FABP5
[truncated: 4,318 more rows]

## Sheet: Table3. Intersecting targets
PTPN1
AKR1B1
PTGS2
MMP9
PIK3R1
ABCB1
PLA2G4A
MMP2
TTR
CFTR
EGFR
PTGS1
GPR35
PLG
ESR1
TERT
MAPK1
MMP3
XDH
PARP1
MAP2K1
GSK3B
KDR
AR
ACHE
CYP19A1
PLA2G2A
CYP1A2
SRC
IKBKB
ESR2
ALOX5
MAPK3
DRD2
AHR
CDK4
NOX4
PDE5A
KIT
ALOX12
ABCG2
MCL1
ARG1
CDK2
MMP13
SYK
CYP1B1
CA2
MMP12
PRKDC
NTRK2
CDK6
EZR
AKR1B10
PTPRS
LCK
ABCC1
CDK1
FLT3
ADORA2A
CHEK1
SIGMAR1
CA1
FYN
ALK
ALOX15
TBXAS1
ST6GAL1
PFKFB3
CA9
MAOA
MAOB
WEE1
CSNK2A1
DAPK1
ADORA3
GRK6
CBR1
OPRD1
CHRNA7

## Sheet: Table4. BP
GroupID	Category	Term	Description	LogP	Log(q-value)	Genes	Symbols	InTerm_InList
1_Summary	GO Biological Processes	GO:0006468	protein phosphorylation	-24.8156	-20.6398	238,983,1017,1019,1021,1111,1457,1612,1956,2322,2534,2870,2932,3551,3791,3815,3932,4915,5591,5594,5595,5604,6714,6850,7465,5209,367,4313,4318,5295,5770,142,246,1139,1813,5320,7498,50507,7430,4985,5743,231,1080	ALK,CDK1,CDK2,CDK4,CDK6,CHEK1,CSNK2A1,DAPK1,EGFR,FLT3,FYN,GRK6,GSK3B,IKBKB,KDR,KIT,LCK,NTRK2,PRKDC,MAPK1,MAPK3,MAP2K1,SRC,SYK,WEE1,PFKFB3,AR,MMP2,MMP9,PIK3R1,PTPN1,PARP1,ALOX15,CHRNA7,DRD2,PLA2G2A,XDH,NOX4,EZR,OPRD1,PTGS2,AKR1B1,CFTR	43/-
1_Member	GO Biological Processes	GO:0006468	protein phosphorylation	-24.8156	-20.6398	238,983,1017,1019,1021,1111,1457,1612,1956,2322,2534,2870,2932,3551,3791,3815,3932,4915,5591,5594,5595,5604,6714,6850,7465	ALK,CDK1,CDK2,CDK4,CDK6,CHEK1,CSNK2A1,DAPK1,EGFR,FLT3,FYN,GRK6,GSK3B,IKBKB,KDR,KIT,LCK,NTRK2,PRKDC,MAPK1,MAPK3,MAP2K1,SRC,SYK,WEE1	25/491
1_Member	GO Biological Processes	GO:0016310	phosphorylation	-22.0381	-18.3395	238,983,1017,1019,1021,1111,1457,1612,1956,2322,2534,2870,2932,3551,3791,3815,3932,4915,5209,5591,5594,5595,5604,6714,6850,7465	ALK,CDK1,CDK2,CDK4,CDK6,CHEK1,CSNK2A1,DAPK1,EGFR,FLT3,FYN,GRK6,GSK3B,IKBKB,KDR,KIT,LCK,NTRK2,PFKFB3,PRKDC,MAPK1,MAPK3,MAP2K1,SRC,SYK,WEE1	26/721
1_Member	GO Biological Processes	GO:0007169	transmembrane receptor protein tyrosine kinase signaling pathway	-17.7696	-14.3719	238,367,1956,2322,2534,2932,3791,3815,3932,4313,4318,4915,5295,5594,5595,5604,5770,6714,6850	ALK,AR,EGFR,FLT3,FYN,GSK3B,KDR,KIT,LCK,MMP2,MMP9,NTRK2,PIK3R1,MAPK1,MAPK3,MAP2K1,PTPN1,SRC,SYK	19/419
1_Member	GO Biological Processes	GO:0007167	enzyme-linked receptor protein signaling pathway	-15.9376	-12.7618	142,238,367,1956,2322,2534,2932,3791,3815,3932,4313,4318,4915,5295,5594,5595,5604,5770,6714,6850	PARP1,ALK,AR,EGFR,FLT3,FYN,GSK3B,KDR,KIT,LCK,MMP2,MMP9,NTRK2,PIK3R1,MAPK1,MAPK3,MAP2K1,PTPN1,SRC,SYK	20/614
1_Member	GO Biological Processes	GO:0043410	positive regulation of MAPK cascade	-14.1884	-11.2679	246,367,1139,1813,1956,2322,3791,3815,4915,5320,5595,5604,5770,6714,6850,7498,50507	ALOX15,AR,CHRNA7,DRD2,EGFR,FLT3,KDR,KIT,NTRK2,PLA2G2A,MAPK3,MAP2K1,PTPN1,SRC,SYK,XDH,NOX4	17/475
1_Member	GO Biological Processes	GO:0043408	regulation of MAPK cascade	-14.0517	-11.1546	246,367,1139,1813,1956,2322,3791,3815,4915,5320,5594,5595,5604,5770,6714,6850,7430,7498,50507	ALOX15,AR,CHRNA7,DRD2,EGFR,FLT3,KDR,KIT,NTRK2,PLA2G2A,MAPK1,MAPK3,MAP2K1,PTPN1,SRC,SYK,EZR,XDH,NOX4	19/669
1_Member	GO Biological Processes	GO:0018193	peptidyl-amino acid modification	-13.548	-10.6945	238,983,1017,1111,1457,1956,2322,2534,2932,3551,3791,3932,5591,5594,5595,6714,6850	ALK,CDK1,CDK2,CHEK1,CSNK2A1,EGFR,FLT3,FYN,GSK3B,IKBKB,KDR,LCK,PRKDC,MAPK1,MAPK3,SRC,SYK	17/520
1_Member	GO Biological Processes	GO:0042327	positive regulation of phosphorylation	-13.4309	-10.5976	238,367,1139,1956,2322,2534,3791,3815,4318,4915,4985,5594,5604,5743,5770,6714,6850,50507	ALK,AR,CHRNA7,EGFR,FLT3,FYN,KDR,KIT,MMP9,NTRK2,OPRD1,MAPK1,MAP2K1,PTGS2,PTPN1,SRC,SYK,NOX4	18/623
1_Member	GO Biological Processes	GO:0018108	peptidyl-tyrosine phosphorylation	-12.9523	-10.1744	238,1956,2322,2534,3791,3932,5595,6714,6850	ALK,EGFR,FLT3,FYN,KDR,LCK,MAPK3,SRC,SYK	9/65
1_Member	GO Biological Processes	GO:0018212	peptidyl-tyrosine modification	-12.8278	-10.067	238,1956,2322,2534,3791,3932,5595,6714,6850	ALK,EGFR,FLT3,FYN,KDR,LCK,MAPK3,SRC,SYK	9/67
1_Member	GO Biological Processes	GO:0010562	positive regulation of phosphorus metabolic process	-12.5532	-9.85451	238,367,1139,1956,2322,2534,3791,3815,4318,4915,4985,5594,5604,5743,5770,6714,6850,50507	ALK,AR,CHRNA7,EGFR,FLT3,FYN,KDR,KIT,MMP9,NTRK2,OPRD1,MAPK1,MAP2K1,PTGS2,PTPN1,SRC,SYK,NOX4	18/702
1_Member	GO Biological Processes	GO:0045937	positive regulation of phosphate metabolic process	-12.5532	-9.85451	238,367,1139,1956,2322,2534,3791,3815,4318,4915,4985,5594,5604,5743,5770,6714,6850,50507	ALK,AR,CHRNA7,EGFR,FLT3,FYN,KDR,KIT,MMP9,NTRK2,OPRD1,MAPK1,MAP2K1,PTGS2,PTPN1,SRC,SYK,NOX4	18/702
1_Member	GO Biological Processes	GO:0046777	protein autophosphorylation	-12.4368	-9.7661	238,1612,1956,2322,2932,3791,3815,3932,4915,5595,6714	ALK,DAPK1,EGFR,FLT3,GSK3B,KDR,KIT,LCK,NTRK2,MAPK3,SRC	11/156
1_Member	GO Biological Processes	GO:0070372	regulation of ERK1 and ERK2 cascade	-11.7812	-9.14948	246,1139,1813,1956,3791,5320,5595,5604,5770,6714,6850,7430,50507	ALOX15,CHRNA7,DRD2,EGFR,KDR,PLA2G2A,MAPK3,MAP2K1,PTPN1,SRC,SYK,EZR,NOX4	13/308
1_Member	GO Biological Processes	GO:0001934	positive regulation of protein phosphorylation	-11.6571	-9.05676	1139,1956,2322,2534,3791,3815,4318,4915,4985,5594,5604,5743,5770,6714,6850,50507	CHRNA7,EGFR,FLT3,FYN,KDR,KIT,MMP9,NTRK2,OPRD1,MAPK1,MAP2K1,PTGS2,PTPN1,SRC,SYK,NOX4	16/578
1_Member	GO Biological Processes	GO:0031401	positive regulation of protein modification process	-10.8823	-8.3693	1139,1956,2322,2534,2932,3791,3815,4318,4915,4985,5594,5604,5743,5770,6714,6850,50507	CHRNA7,EGFR,FLT3,FYN,GSK3B,KDR,KIT,MMP9,NTRK2,OPRD1,MAPK1,MAP2K1,PTGS2,PTPN1,SRC,SYK,NOX4	17/764
1_Member	GO Biological Processes	GO:0051347	positive regulation of transferase activity	-10.7101	-8.20636	238,1139,1956,2322,3791,3815,4915,5594,5595,5604,5770,6714,50507	ALK,CHRNA7,EGFR,FLT3,KDR,KIT,NTRK2,MAPK1,MAPK3,MAP2K1,PTPN1,SRC,NOX4	13/375
1_Member	GO Biological Processes	GO:0038083	peptidyl-tyrosine autophosphorylation	-9.65256	-7.25491	238,1956,3791,3932,5595	ALK,EGFR,KDR,LCK,MAPK3	5/14
1_Member	GO Biological Processes	GO:0070374	positive regulation of ERK1 and ERK2 cascade	-9.55066	-7.18777	246,1139,1813,1956,3791,5320,5595,5604,6714,50507	ALOX15,CHRNA7,DRD2,EGFR,KDR,PLA2G2A,MAPK3,MAP2K1,SRC,NOX4	10/215
1_Member	GO Biological Processes	GO:0051338	regulation of transferase activity	-8.89952	-6.62157	238,1139,1956,2322,2932,3791,3815,4915,5594,5595,5604,5770,6714,50507	ALK,CHRNA7,EGFR,FLT3,GSK3B,KDR,KIT,NTRK2,MAPK1,MAPK3,MAP2K1,PTPN1,SRC,NOX4	14/639
1_Member	GO Biological Processes	GO:0033674	positive regulation of kinase activity	-8.12784	-5.99737	238,1956,2322,3791,3815,4915,5604,5770,6714,50507	ALK,EGFR,FLT3,KDR,KIT,NTRK2,MAP2K1,PTPN1,SRC,NOX4	10/302
1_Member	GO Biological Processes	GO:0051896	regulation of phosphatidylinositol 3-kinase/protein kinase B signal transduction	-7.62388	-5.56945	1813,1956,2322,3791,3815,4915,6714,7498,50507	DRD2,EGFR,FLT3,KDR,KIT,NTRK2,SRC,XDH,NOX4	9/253
1_Member	GO Biological Processes	GO:0050730	regulation of peptidyl-tyrosine phosphorylation	-6.82398	-4.8577	1956,2322,2534,3815,5770,6714,6850,50507	EGFR,FLT3,FYN,KIT,PTPN1,SRC,SYK,NOX4	8/225
1_Member	GO Biological Processes	GO:0050731	positive regulation of peptidyl-tyrosine phosphorylation	-6.5628	-4.63004	2322,2534,3815,5770,6714,6850,50507	FLT3,FYN,KIT,PTPN1,SRC,SYK,NOX4	7/164
1_Member	GO Biological Processes	GO:0051897	positive regulation of phosphatidylinositol 3-kinase/protein kinase B signal transduction	-6.43981	-4.52646	1956,2322,3791,3815,4915,6714,50507	EGFR,FLT3,KDR,KIT,NTRK2,SRC,NOX4	7/171
1_Member	GO Biological Processes	GO:0048871	multicellular organismal-level homeostasis	-6.26902	-4.38325	231,238,1080,1813,2322,3791,3815,5320,5743,6714,50507	AKR1B1,ALK,CFTR,DRD2,FLT3,KDR,KIT,PLA2G2A,PTGS2,SRC,NOX4	11/603
1_Member	GO Biological Processes	GO:0071902	positive regulation of protein serine/threonine kinase activity	-5.94871	-4.13464	1956,2322,3815,5604,5770,6714	EGFR,FLT3,KIT,MAP2K1,PTPN1,SRC	6/127
1_Member	GO Biological Processes	GO:0070848	response to growth factor	-5.9404	-4.12821	142,1956,2322,2534,3791,4915,4985,5594,5595,6714	PARP1,EGFR,FLT3,FYN,KDR,NTRK2,OPRD1,MAPK1,MAPK3,SRC	10/520
1_Member	GO Biological Processes	GO:0043549	regulation of kinase activity	-5.85149	-4.0595	238,1956,2322,3791,3815,4915,5604,5770,6714,50507	ALK,EGFR,FLT3,KDR,KIT,NTRK2,MAP2K1,PTPN1,SRC,NOX4	10/532
1_Member	GO Biological Processes	GO:0045860	positive regulation of protein kinase activity	-5.27287	-3.57564	1956,2322,3815,5604,5770,6714,50507	EGFR,FLT3,KIT,MAP2K1,PTPN1,SRC,NOX4	7/256
1_Member	GO Biological Processes	GO:0071363	cellular response to growth factor stimulus	-5.24207	-3.55057	142,1956,2322,2534,3791,4915,4985,5595,6714	PARP1,EGFR,FLT3,FYN,KDR,NTRK2,OPRD1,MAPK3,SRC	9/488
1_Member	GO Biological Processes	GO:0043406	positive regulation of MAP kinase activity	-4.17071	-2.66049	1956,2322,3815,5770	EGFR,FLT3,KIT,PTPN1	4/82
1_Member	GO Biological Processes	GO:0071900	regulation of protein serine/threonine kinase activity	-4.11206	-2.60836	1956,2322,3815,5604,5770,6714	EGFR,FLT3,KIT,MAP2K1,PTPN1,SRC	6/267
1_Member	GO Biological Processes	GO:0045859	regulation of protein kinase activity	-3.60519	-2.19801	1956,2322,3815,5604,5770,6714,50507	EGFR,FLT3,KIT,MAP2K1,PTPN1,SRC,NOX4	7/470
1_Member	GO Biological Processes	GO:0043405	regulation of MAP kinase activity	-3.35003	-1.98781	1956,2322,3815,5770	EGFR,FLT3,KIT,PTPN1	4/134
2_Summary	GO Biological Processes	GO:1901699	cellular response to nitrogen compound	-22.1393	-18.3395	43,142,196,760,1017,1080,1111,1139,1545,1813,1956,2534,2932,4313,4314,4363,4915,5295,5591,5594,5595,5743,5770,6714,7430,240,5604,5802,983	ACHE,PARP1,AHR,CA2,CDK2,CFTR,CHEK1,CHRNA7,CYP1B1,DRD2,EGFR,FYN,GSK3B,MMP2,MMP3,ABCC1,NTRK2,PIK3R1,PRKDC,MAPK1,MAPK3,PTGS2,PTPN1,SRC,EZR,ALOX5,MAP2K1,PTPRS,CDK1	29/-
2_Member	GO Biological Processes	GO:1901699	cellular response to nitrogen compound	-22.1393	-18.3395	43,142,196,760,1017,1080,1111,1139,1545,1813,1956,2534,2932,4313,4314,4363,4915,5295,5591,5594,5595,5743,5770,6714,7430	ACHE,PARP1,AHR,CA2,CDK2,CFTR,CHEK1,CHRNA7,CYP1B1,DRD2,EGFR,FYN,GSK3B,MMP2,MMP3,ABCC1,NTRK2,PIK3R1,PRKDC,MAPK1,MAPK3,PTGS2,PTPN1,SRC,EZR	25/631
2_Member	GO Biological Processes	GO:0071417	cellular response to organonitrogen compound	-18.0542	-14.5774	142,196,760,1080,1111,1545,1813,1956,2534,2932,4313,4363,4915,5295,5591,5594,5595,5743,5770,6714,7430	PARP1,AHR,CA2,CFTR,CHEK1,CYP1B1,DRD2,EGFR,FYN,GSK3B,MMP2,ABCC1,NTRK2,PIK3R1,PRKDC,MAPK1,MAPK3,PTGS2,PTPN1,SRC,EZR	21/556
2_Member	GO Biological Processes	GO:1901653	cellular response to peptide	-10.4123	-7.92665	142,760,1545,2534,2932,4363,5295,5591,5594,5595,5770,6714	PARP1,CA2,CYP1B1,FYN,GSK3B,ABCC1,PIK3R1,PRKDC,MAPK1,MAPK3,PTPN1,SRC	12/313
2_Member	GO Biological Processes	GO:0080135	regulation of cellular response to stress	-10.1486	-7.70524	142,240,1111,1813,1956,2932,5295,5591,5594,5595,5604,5743,5770,5802	PARP1,ALOX5,CHEK1,DRD2,EGFR,GSK3B,PIK3R1,PRKDC,MAPK1,MAPK3,MAP2K1,PTGS2,PTPN1,PTPRS	14/512
2_Member	GO Biological Processes	GO:0071375	cellular response to peptide hormone stimulus	-8.94832	-6.65901	142,760,1545,2932,5295,5591,5594,5595,5770,6714	PARP1,CA2,CYP1B1,GSK3B,PIK3R1,PRKDC,MAPK1,MAPK3,PTPN1,SRC	10/248
2_Member	GO Biological Processes	GO:0032386	regulation of intracellular transport	-8.63939	-6.41783	983,2932,5295,5594,5595,5604,5743,5770,6714,7430	CDK1,GSK3B,PIK3R1,MAPK1,MAPK3,MAP2K1,PTGS2,PTPN1,SRC,EZR	10/267
2_Member	GO Biological Processes	GO:0043434	response to peptide hormone	-8.28272	-6.11124	142,760,1545,2932,5295,5591,5594,5595,5743,5770,6714	PARP1,CA2,CYP1B1,GSK3B,PIK3R1,PRKDC,MAPK1,MAPK3,PTGS2,PTPN1,SRC	11/381
2_Member	GO Biological Processes	GO:0032869	cellular response to insulin stimulus	-8.19156	-6.04107	142,2932,5295,5591,5594,5595,5770,6714	PARP1,GSK3B,PIK3R1,PRKDC,MAPK1,MAPK3,PTPN1,SRC	8/150
2_Member	GO Biological Processes	GO:0032868	response to insulin	-6.92913	-4.94646	142,2932,5295,5591,5594,5595,5770,6714	PARP1,GSK3B,PIK3R1,PRKDC,MAPK1,MAPK3,PTPN1,SRC	8/218
2_Member	GO Biological Processes	GO:0008286	insulin receptor signaling pathway	-5.98439	-4.16077	2932,5295,5594,5595,5770	GSK3B,PIK3R1,MAPK1,MAPK3,PTPN1	5/68
3_Summary	GO Biological Processes	GO:0010035	response to inorganic substance	-18.5282	-14.9545	135,142,246,983,1017,1544,1545,1813,1956,2534,3791,3815,4129,4313,4314,4318,5594,5595,5743,6714,7015,231,1612,4363,5742,5295,5340,1111,196,1019,2932,6850,5591,5320	ADORA2A,PARP1,ALOX15,CDK1,CDK2,CYP1A2,CYP1B1,DRD2,EGFR,FYN,KDR,KIT,MAOB,MMP2,MMP3,MMP9,MAPK1,MAPK3,PTGS2,SRC,TERT,AKR1B1,DAPK1,ABCC1,PTGS1,PIK3R1,PLG,CHEK1,AHR,CDK4,GSK3B,SYK,PRKDC,PLA2G2A	34/-
3_Member	GO Biological Processes	GO:0010035	response to inorganic substance	-18.5282	-14.9545	135,142,246,983,1017,1544,1545,1813,1956,2534,3791,3815,4129,4313,4314,4318,5594,5595,5743,6714,7015	ADORA2A,PARP1,ALOX15,CDK1,CDK2,CYP1A2,CYP1B1,DRD2,EGFR,FYN,KDR,KIT,MAOB,MMP2,MMP3,MMP9,MAPK1,MAPK3,PTGS2,SRC,TERT	21/527
3_Member	GO Biological Processes	GO:0062197	cellular response to chemical stress	-15.1789	-12.1492	142,231,983,1545,1612,1956,2534,4313,4314,4318,4363,5594,5595,5743,6714	PARP1,AKR1B1,CDK1,CYP1B1,DAPK1,EGFR,FYN,MMP2,MMP3,MMP9,ABCC1,MAPK1,MAPK3,PTGS2,SRC	15/276
3_Member	GO Biological Processes	GO:0034599	cellular response to oxidative stress	-13.5966	-10.7218	142,983,1545,1612,1956,2534,4313,4314,4318,4363,5594,5595,6714	PARP1,CDK1,CYP1B1,DAPK1,EGFR,FYN,MMP2,MMP3,MMP9,ABCC1,MAPK1,MAPK3,SRC	13/222
3_Member	GO Biological Processes	GO:0006979	response to oxidative stress	-13.3777	-10.5636	142,983,1545,1612,1956,2534,4313,4314,4318,4363,5594,5595,5742,5743,6714	PARP1,CDK1,CYP1B1,DAPK1,EGFR,FYN,MMP2,MMP3,MMP9,ABCC1,MAPK1,MAPK3,PTGS1,PTGS2,SRC	15/366
3_Member	GO Biological Processes	GO:0034614	cellular response to reactive oxygen species	-11.6528	-9.05676	983,1545,1956,2534,4313,4314,4318,5594,5595,6714	CDK1,CYP1B1,EGFR,FYN,MMP2,MMP3,MMP9,MAPK1,MAPK3,SRC	10/132
3_Member	GO Biological Processes	GO:0046686	response to cadmium ion	-11.4216	-8.84784	983,1544,1956,3815,4318,5594,5595,7015	CDK1,CYP1A2,EGFR,KIT,MMP9,MAPK1,MAPK3,TERT	8/60
3_Member	GO Biological Processes	GO:0010038	response to metal ion	-10.9309	-8.40831	142,246,983,1544,1813,1956,3815,4129,4318,5594,5595,5743,7015	PARP1,ALOX15,CDK1,CYP1A2,DRD2,EGFR,KIT,MAOB,MMP9,MAPK1,MAPK3,PTGS2,TERT	13/360
3_Member	GO Biological Processes	GO:0000302	response to reactive oxygen species	-10.3085	-7.8403	983,1545,1956,2534,4313,4314,4318,5594,5595,6714	CDK1,CYP1B1,EGFR,FYN,MMP2,MMP3,MMP9,MAPK1,MAPK3,SRC	10/180
3_Member	GO Biological Processes	GO:0071241	cellular response to inorganic substance	-9.28379	-6.95309	142,246,1017,1544,1956,4314,4318,5594,5595,5743	PARP1,ALOX15,CDK2,CYP1A2,EGFR,MMP3,MMP9,MAPK1,MAPK3,PTGS2	10/229
3_Member	GO Biological Processes	GO:0030335	positive regulation of cell migration	-8.40021	-6.20668	1545,1956,3791,3815,4313,4318,5295,5340,5594,5595,5743,6714,7015	CYP1B1,EGFR,KDR,KIT,MMP2,MMP9,PIK3R1,PLG,MAPK1,MAPK3,PTGS2,SRC,TERT	13/580
3_Member	GO Biological Processes	GO:0009612	response to mechanical stimulus	-8.21872	-6.05995	1111,1813,1956,2534,3815,4313,5595,5743,6714	CHEK1,DRD2,EGFR,FYN,KIT,MMP2,MAPK3,PTGS2,SRC	9/216
3_Member	GO Biological Processes	GO:2000147	positive regulation of cell motility	-8.16508	-6.01866	1545,1956,3791,3815,4313,4318,5295,5340,5594,5595,5743,6714,7015	CYP1B1,EGFR,KDR,KIT,MMP2,MMP9,PIK3R1,PLG,MAPK1,MAPK3,PTGS2,SRC,TERT	13/607
3_Member	GO Biological Processes	GO:0040017	positive regulation of locomotion	-8.04772	-5.93359	1545,1956,3791,3815,4313,4318,5295,5340,5594,5595,5743,6714,7015	CYP1B1,EGFR,KDR,KIT,MMP2,MMP9,PIK3R1,PLG,MAPK1,MAPK3,PTGS2,SRC,TERT	13/621
3_Member	GO Biological Processes	GO:0048661	positive regulation of smooth muscle cell proliferation	-8.04493	-5.93359	1956,4313,4318,5295,5743,6714,7015	EGFR,MMP2,MMP9,PIK3R1,PTGS2,SRC,TERT	7/100
3_Member	GO Biological Processes	GO:0071216	cellular response to biotic stimulus	-7.71371	-5.63828	196,1019,2932,4314,4318,5594,5595,6714,6850	AHR,CDK4,GSK3B,MMP3,MMP9,MAPK1,MAPK3,SRC,SYK	9/247
3_Member	GO Biological Processes	GO:0048660	regulation of smooth muscle cell proliferation	-7.68642	-5.61783	1956,4313,4318,5295,5591,5743,6714,7015	EGFR,MMP2,MMP9,PIK3R1,PRKDC,PTGS2,SRC,TERT	8/174
3_Member	GO Biological Processes	GO:0071276	cellular response to cadmium ion	-7.33527	-5.31175	1544,1956,4318,5594,5595	CYP1A2,EGFR,MMP9,MAPK1,MAPK3	5/37
3_Member	GO Biological Processes	GO:0071248	cellular response to metal ion	-7.21714	-5.20271	142,246,1544,1956,4318,5594,5595,5743	PARP1,ALOX15,CYP1A2,EGFR,MMP9,MAPK1,MAPK3,PTGS2	8/200
3_Member	GO Biological Processes	GO:0002237	response to molecule of bacterial origin	-6.38583	-4.48187	196,1019,4129,4314,4318,5594,5595,5743,6714	AHR,CDK4,MAOB,MMP3,MMP9,MAPK1,MAPK3,PTGS2,SRC	9/354
3_Member	GO Biological Processes	GO:0071219	cellular response to molecule of bacterial origin	-5.6935	-3.93886	196,1019,4314,4318,5594,5595,6714	AHR,CDK4,MMP3,MMP9,MAPK1,MAPK3,SRC	7/221
3_Member	GO Biological Processes	GO:0009617	response to bacterium	-5.58071	-3.83627	196,1019,4129,4314,4318,5320,5594,5595,5743,6714,6850	AHR,CDK4,MAOB,MMP3,MMP9,PLA2G2A,MAPK1,MAPK3,PTGS2,SRC,SYK	11/710
3_Member	GO Biological Processes	GO:0032496	response to lipopolysaccharide	-5.54332	-3.80826	1019,4129,4314,4318,5594,5595,5743,6714	CDK4,MAOB,MMP3,MMP9,MAPK1,MAPK3,PTGS2,SRC	8/333
3_Member	GO Biological Processes	GO:0010638	positive regulation of organelle organization	-5.12968	-3.4508	246,983,1017,2932,3791,4318,5594,5595,6714	ALOX15,CDK1,CDK2,GSK3B,KDR,MMP9,MAPK1,MAPK3,SRC	9/504
3_Member	GO Biological Processes	GO:0071222	cellular response to lipopolysaccharide	-4.71627	-3.10037	1019,4314,4318,5594,5595,6714	CDK4,MMP3,MMP9,MAPK1,MAPK3,SRC	6/208
3_Member	GO Biological Processes	GO:0071260	cellular response to mechanical stimulus	-4.36889	-2.8225	1111,1956,5595,5743	CHEK1,EGFR,MAPK3,PTGS2	4/73
3_Member	GO Biological Processes	GO:0031667	response to nutrient levels	-2.7699	-1.47842	1545,1956,5594,5595,5743,6714	CYP1B1,EGFR,MAPK1,MAPK3,PTGS2,SRC	6/479
3_Member	GO Biological Processes	GO:0071496	cellular response to external stimulus	-2.75888	-1.4707	1111,1956,5594,5595,5743	CHEK1,EGFR,MAPK1,MAPK3,PTGS2	5/326
3_Member	GO Biological Processes	GO:0009991	response to extracellular stimulus	-2.64209	-1.36938	1545,1956,5594,5595,5743,6714	CYP1B1,EGFR,MAPK1,MAPK3,PTGS2,SRC	6/508
4_Summary	GO Biological Processes	GO:0006690	icosanoid metabolic process	-17.3138	-13.9831	231,239,240,246,873,1544,1545,4363,5321,5742,5743,6850,6916,1588,57016,383,6480,50507,1080,5295	AKR1B1,ALOX12,ALOX5,ALOX15,CBR1,CYP1A2,CYP1B1,ABCC1,PLA2G4A,PTGS1,PTGS2,SYK,TBXAS1,CYP19A1,AKR1B10,ARG1,ST6GAL1,NOX4,CFTR,PIK3R1	20/-
4_Member	GO Biological Processes	GO:0006690	icosanoid metabolic process	-17.3138	-13.9831	231,239,240,246,873,1544,1545,4363,5321,5742,5743,6850,6916	AKR1B1,ALOX12,ALOX5,ALOX15,CBR1,CYP1A2,CYP1B1,ABCC1,PLA2G4A,PTGS1,PTGS2,SYK,TBXAS1	13/116
4_Member	GO Biological Processes	GO:0120254	olefinic compound metabolic process	-16.0175	-12.7959	231,239,240,246,873,1544,1545,1588,5321,5742,5743,6916,57016	AKR1B1,ALOX12,ALOX5,ALOX15,CBR1,CYP1A2,CYP1B1,CYP19A1,PLA2G4A,PTGS1,PTGS2,TBXAS1,AKR1B10	13/145
4_Member	GO Biological Processes	GO:0019369	arachidonic acid metabolic process	-15.3618	-12.3	239,240,246,873,1544,1545,5321,5742,5743,6916	ALOX12,ALOX5,ALOX15,CBR1,CYP1A2,CYP1B1,PLA2G4A,PTGS1,PTGS2,TBXAS1	10/58
4_Member	GO Biological Processes	GO:0033559	unsaturated fatty acid metabolic process	-14.4076	-11.4622	231,239,240,246,873,1544,1545,5321,5742,5743,6916	AKR1B1,ALOX12,ALOX5,ALOX15,CBR1,CYP1A2,CYP1B1,PLA2G4A,PTGS1,PTGS2,TBXAS1	11/104
4_Member	GO Biological Processes	GO:0001676	long-chain fatty acid metabolic process	-12.4962	-9.81177	239,240,246,873,1544,1545,5321,5742,5743,6916	ALOX12,ALOX5,ALOX15,CBR1,CYP1A2,CYP1B1,PLA2G4A,PTGS1,PTGS2,TBXAS1	10/109
4_Member	GO Biological Processes	GO:0006636	unsaturated fatty acid biosynthetic process	-11.0063	-8.474	239,246,873,5321,5742,5743,6916	ALOX12,ALOX15,CBR1,PLA2G4A,PTGS1,PTGS2,TBXAS1	7/39
4_Member	GO Biological Processes	GO:0006633	fatty acid biosynthetic process	-10.5878	-8.09325	239,240,246,873,1544,5321,5742,5743,6916	ALOX12,ALOX5,ALOX15,CBR1,CYP1A2,PLA2G4A,PTGS1,PTGS2,TBXAS1	9/117
4_Member	GO Biological Processes	GO:0046456	icosanoid biosynthetic process	-10.2039	-7.74412	240,873,5321,5742,5743,6850,6916	ALOX5,CBR1,PLA2G4A,PTGS1,PTGS2,SYK,TBXAS1	7/50
4_Member	GO Biological Processes	GO:0046394	carboxylic acid biosynthetic process	-9.7682	-7.34828	231,239,240,246,873,1544,5321,5742,5743,6850,6916	AKR1B1,ALOX12,ALOX5,ALOX15,CBR1,CYP1A2,PLA2G4A,PTGS1,PTGS2,SYK,TBXAS1	11/275
4_Member	GO Biological Processes	GO:0016053	organic acid biosynthetic process	-9.71814	-7.30577	231,239,240,246,873,1544,5321,5742,5743,6850,6916	AKR1B1,ALOX12,ALOX5,ALOX15,CBR1,CYP1A2,PLA2G4A,PTGS1,PTGS2,SYK,TBXAS1	11/278
4_Member	GO Biological Processes	GO:0019752	carboxylic acid metabolic process	-9.65564	-7.25491	231,239,240,246,383,873,1544,1545,4363,5321,5742,5743,6480,6850,6916,50507	AKR1B1,ALOX12,ALOX5,ALOX15,ARG1,CBR1,CYP1A2,CYP1B1,ABCC1,PLA2G4A,PTGS1,PTGS2,ST6GAL1,SYK,TBXAS1,NOX4	16/789
4_Member	GO Biological Processes	GO:0044283	small molecule biosynthetic process	-9.57021	-7.19375	231,239,240,246,873,1080,1544,1588,5321,5742,5743,6850,6916	AKR1B1,ALOX12,ALOX5,ALOX15,CBR1,CFTR,CYP1A2,CYP19A1,PLA2G4A,PTGS1,PTGS2,SYK,TBXAS1	13/464
4_Member	GO Biological Processes	GO:0072330	monocarboxylic acid biosynthetic process	-9.20123	-6.88276	239,240,246,873,1544,5321,5742,5743,6916	ALOX12,ALOX5,ALOX15,CBR1,CYP1A2,PLA2G4A,PTGS1,PTGS2,TBXAS1	9/167
4_Member	GO Biological Processes	GO:0006631	fatty acid metabolic process	-9.01611	-6.71537	231,239,240,246,873,1544,1545,5321,5742,5743,6916	AKR1B1,ALOX12,ALOX5,ALOX15,CBR1,CYP1A2,CYP1B1,PLA2G4A,PTGS1,PTGS2,TBXAS1	11/324
4_Member	GO Biological Processes	GO:0006693	prostaglandin metabolic process	-8.99887	-6.70388	231,873,5321,5742,5743,6916	AKR1B1,CBR1,PLA2G4A,PTGS1,PTGS2,TBXAS1	6/40
4_Member	GO Biological Processes	GO:0006692	prostanoid metabolic process	-8.93106	-6.64735	231,873,5321,5742,5743,6916	AKR1B1,CBR1,PLA2G4A,PTGS1,PTGS2,TBXAS1	6/41
4_Member	GO Biological Processes	GO:0001516	prostaglandin biosynthetic process	-8.65176	-6.42535	873,5321,5742,5743,6916	CBR1,PLA2G4A,PTGS1,PTGS2,TBXAS1	5/21
4_Member	GO Biological Processes	GO:0046457	prostanoid biosynthetic process	-8.65176	-6.42535	873,5321,5742,5743,6916	CBR1,PLA2G4A,PTGS1,PTGS2,TBXAS1	5/21
4_Member	GO Biological Processes	GO:0008610	lipid biosynthetic process	-8.28551	-6.11124	231,239,240,246,873,1080,1544,1588,5295,5321,5742,5743,6916	AKR1B1,ALOX12,ALOX5,ALOX15,CBR1,CFTR,CYP1A2,CYP19A1,PIK3R1,PLA2G4A,PTGS1,PTGS2,TBXAS1	13/593
4_Member	GO Biological Processes	GO:0019371	cyclooxygenase pathway	-8.24957	-6.08237	873,5742,5743,6916	CBR1,PTGS1,PTGS2,TBXAS1	4/9
4_Member	GO Biological Processes	GO:0032787	monocarboxylic acid metabolic process	-6.90689	-4.92975	231,239,240,246,873,1544,1545,5321,5742,5743,6916	AKR1B1,ALOX12,ALOX5,ALOX15,CBR1,CYP1A2,CYP1B1,PLA2G4A,PTGS1,PTGS2,TBXAS1	11/520
5_Summary	GO Biological Processes	GO:1901652	response to peptide	-16.862	-13.5893	142,760,1139,1545,2534,2932,4313,4314,4318,4321,4322,4363,5295,5591,5594,5595,5743,5770,6714,5340,231,1111,1956,1813,3815,983,7015,5604	PARP1,CA2,CHRNA7,CYP1B1,FYN,GSK3B,MMP2,MMP3,MMP9,MMP12,MMP13,ABCC1,PIK3R1,PRKDC,MAPK1,MAPK3,PTGS2,PTPN1,SRC,PLG,AKR1B1,CHEK1,EGFR,DRD2,KIT,CDK1,TERT,MAP2K1	28/-
5_Member	GO Biological Processes	GO:1901652	response to peptide	-16.862	-13.5893	142,760,1139,1545,2534,2932,4313,4314,4318,4321,4322,4363,5295,5591,5594,5595,5743,5770,6714	PARP1,CA2,CHRNA7,CYP1B1,FYN,GSK3B,MMP2,MMP3,MMP9,MMP12,MMP13,ABCC1,PIK3R1,PRKDC,MAPK1,MAPK3,PTGS2,PTPN1,SRC	19/469
5_Member	GO Biological Processes	GO:1904645	response to amyloid-beta	-15.6967	-12.5719	142,1139,2534,2932,4313,4314,4318,4321,4322,4363	PARP1,CHRNA7,FYN,GSK3B,MMP2,MMP3,MMP9,MMP12,MMP13,ABCC1	10/54
5_Member	GO Biological Processes	GO:0022617	extracellular matrix disassembly	-8.61688	-6.40957	4313,4314,4318,4321,4322,5340	MMP2,MMP3,MMP9,MMP12,MMP13,PLG	6/46
5_Member	GO Biological Processes	GO:0071214	cellular response to abiotic stimulus	-7.91499	-5.81107	142,231,1111,1956,4313,4314,4318,5295,5595,5743	PARP1,AKR1B1,CHEK1,EGFR,MMP2,MMP3,MMP9,PIK3R1,MAPK3,PTGS2	10/318
5_Member	GO Biological Processes	GO:0104004	cellular response to environmental stimulus	-7.91499	-5.81107	142,231,1111,1956,4313,4314,4318,5295,5595,5743	PARP1,AKR1B1,CHEK1,EGFR,MMP2,MMP3,MMP9,PIK3R1,MAPK3,PTGS2	10/318
5_Member	GO Biological Processes	GO:0070141	response to UV-A	-7.35387	-5.32108	1956,4313,4314,4318	EGFR,MMP2,MMP3,MMP9	4/14
5_Member	GO Biological Processes	GO:0030574	collagen catabolic process	-7.10352	-5.10381	4313,4314,4318,4321,4322	MMP2,MMP3,MMP9,MMP12,MMP13	5/41
5_Member	GO Biological Processes	GO:0032963	collagen metabolic process	-6.11663	-4.25841	4313,4314,4318,4321,4322	MMP2,MMP3,MMP9,MMP12,MMP13	5/64
5_Member	GO Biological Processes	GO:0009314	response to radiation	-5.73756	-3.97673	142,1813,1956,3815,4313,4314,4318,5295,5591	PARP1,DRD2,EGFR,KIT,MMP2,MMP3,MMP9,PIK3R1,PRKDC	9/424
5_Member	GO Biological Processes	GO:0009416	response to light stimulus	-5.72196	-3.96446	142,1813,1956,3815,4313,4314,4318,5295	PARP1,DRD2,EGFR,KIT,MMP2,MMP3,MMP9,PIK3R1	8/315
5_Member	GO Biological Processes	GO:0071492	cellular response to UV-A	-5.54002	-3.80826	4313,4314,4318	MMP2,MMP3,MMP9	3/11
5_Member	GO Biological Processes	GO:0009411	response to UV	-5.4617	-3.73694	142,1956,4313,4314,4318,5295	PARP1,EGFR,MMP2,MMP3,MMP9,PIK3R1	6/154
5_Member	GO Biological Processes	GO:0034644	cellular response to UV	-5.37917	-3.66576	142,4313,4314,4318,5295	PARP1,MMP2,MMP3,MMP9,PIK3R1	5/90
5_Member	GO Biological Processes	GO:0022411	cellular component disassembly	-5.35696	-3.64654	983,2932,4313,4314,4318,4321,4322,5340	CDK1,GSK3B,MMP2,MMP3,MMP9,MMP12,MMP13,PLG	8/353
5_Member	GO Biological Processes	GO:0030198	extracellular matrix organization	-5.0804	-3.40975	1545,4313,4314,4318,4321,4322,5340	CYP1B1,MMP2,MMP3,MMP9,MMP12,MMP13,PLG	7/274
5_Member	GO Biological Processes	GO:0043062	extracellular structure organization	-5.07012	-3.40486	1545,4313,4314,4318,4321,4322,5340	CYP1B1,MMP2,MMP3,MMP9,MMP12,MMP13,PLG	7/275
5_Member	GO Biological Processes	GO:0045229	external encapsulating structure organization	-5.05988	-3.39747	1545,4313,4314,4318,4321,4322,5340	CYP1B1,MMP2,MMP3,MMP9,MMP12,MMP13,PLG	7/276
5_Member	GO Biological Processes	GO:0048013	ephrin receptor signaling pathway	-5.05873	-3.39747	2534,4313,4318,6714	FYN,MMP2,MMP9,SRC	4/49
5_Member	GO Biological Processes	GO:1904707	positive regulation of vascular associated smooth muscle cell proliferation	-4.95489	-3.30929	4313,4318,6714,7015	MMP2,MMP9,SRC,TERT	4/52
5_Member	GO Biological Processes	GO:0071482	cellular response to light stimulus	-4.85844	-3.22297	142,4313,4314,4318,5295	PARP1,MMP2,MMP3,MMP9,PIK3R1	5/115
5_Member	GO Biological Processes	GO:0071478	cellular response to radiation	-4.02241	-2.53145	142,4313,4314,4318,5295	PARP1,MMP2,MMP3,MMP9,PIK3R1	5/172
5_Member	GO Biological Processes	GO:1904705	regulation of vascular associated smooth muscle cell proliferation	-3.95772	-2.48349	4313,4318,6714,7015	MMP2,MMP9,SRC,TERT	4/93
5_Member	GO Biological Processes	GO:0150077	regulation of neuroinflammatory response	-3.78673	-2.3444	4314,4318,5743	MMP3,MMP9,PTGS2	3/40
5_Member	GO Biological Processes	GO:0007566	embryo implantation	-3.69261	-2.26694	4313,4318,5743	MMP2,MMP9,PTGS2	3/43
5_Member	GO Biological Processes	GO:0035987	endodermal cell differentiation	-3.60517	-2.19801	4313,4318,5604	MMP2,MMP9,MAP2K1	3/46
5_Member	GO Biological Processes	GO:0001706	endoderm formation	-3.3519	-1.98901	4313,4318,5604	MMP2,MMP9,MAP2K1	3/56
5_Member	GO Biological Processes	GO:0007492	endoderm development	-2.88423	-1.58174	4313,4318,5604	MMP2,MMP9,MAP2K1	3/81
5_Member	GO Biological Processes	GO:0001704	formation of primary germ layer	-2.37874	-1.12774	4313,4318,5604	MMP2,MMP9,MAP2K1	3/122
6_Summary	GO Biological Processes	GO:0071407	cellular response to organic cyclic compound	-15.6685	-12.5719	196,367,983,1019,1080,1111,1545,1813,1956,2099,2100,2322,2932,4313,5594,5743,6714,7430,4314,4318,5595,6850,142,760,4129,5295,5591,5770,2534,3791,3815,5243,5604,8654,1588,7498,3551,768,4321,4322,5340	AHR,AR,CDK1,CDK4,CFTR,CHEK1,CYP1B1,DRD2,EGFR,ESR1,ESR2,FLT3,GSK3B,MMP2,MAPK1,PTGS2,SRC,EZR,MMP3,MMP9,MAPK3,SYK,PARP1,CA2,MAOB,PIK3R1,PRKDC,PTPN1,FYN,KDR,KIT,ABCB1,MAP2K1,PDE5A,CYP19A1,XDH,IKBKB,CA9,MMP12,MMP13,PLG	41/-
6_Member	GO Biological Processes	GO:0071407	cellular response to organic cyclic compound	-15.6685	-12.5719	196,367,983,1019,1080,1111,1545,1813,1956,2099,2100,2322,2932,4313,5594,5743,6714,7430	AHR,AR,CDK1,CDK4,CFTR,CHEK1,CYP1B1,DRD2,EGFR,ESR1,ESR2,FLT3,GSK3B,MMP2,MAPK1,PTGS2,SRC,EZR	18/462
6_Member	GO Biological Processes	GO:0071396	cellular response to lipid	-13.3347	-10.5391	196,367,1019,1080,1545,1956,2099,2100,2322,2932,4313,4314,4318,5594,5595,6714,6850	AHR,AR,CDK4,CFTR,CYP1B1,EGFR,ESR1,ESR2,FLT3,GSK3B,MMP2,MMP3,MMP9,MAPK1,MAPK3,SRC,SYK	17/536
6_Member	GO Biological Processes	GO:0009725	response to hormone	-11.7408	-9.12128	142,367,760,1545,1956,2099,2100,2322,2932,4129,4313,5295,5591,5594,5595,5743,5770,6714	PARP1,AR,CA2,CYP1B1,EGFR,ESR1,ESR2,FLT3,GSK3B,MAOB,MMP2,PIK3R1,PRKDC,MAPK1,MAPK3,PTGS2,PTPN1,SRC	18/785
6_Member	GO Biological Processes	GO:0032870	cellular response to hormone stimulus	-11.3805	-8.81745	142,367,760,1545,1956,2099,2100,2322,2932,5295,5591,5594,5595,5770,6714	PARP1,AR,CA2,CYP1B1,EGFR,ESR1,ESR2,FLT3,GSK3B,PIK3R1,PRKDC,MAPK1,MAPK3,PTPN1,SRC	15/504
6_Member	GO Biological Processes	GO:0048545	response to steroid hormone	-9.63599	-7.24651	142,367,1545,1956,2099,2100,2322,4129,5594,5743,6714	PARP1,AR,CYP1B1,EGFR,ESR1,ESR2,FLT3,MAOB,MAPK1,PTGS2,SRC	11/283
6_Member	GO Biological Processes	GO:0008283	cell population proliferation	-9.30408	-6.96712	367,983,1111,1813,1956,2099,2322,2534,3791,3815,5243,5594,5604,6714,8654	AR,CDK1,CHEK1,DRD2,EGFR,ESR1,FLT3,FYN,KDR,KIT,ABCB1,MAPK1,MAP2K1,SRC,PDE5A	15/710
6_Member	GO Biological Processes	GO:0048732	gland development	-8.88356	-6.62157	367,1545,1588,1813,1956,2099,4313,5594,5595,5604,6714,7498	AR,CYP1B1,CYP19A1,DRD2,EGFR,ESR1,MMP2,MAPK1,MAPK3,MAP2K1,SRC,XDH	12/426
6_Member	GO Biological Processes	GO:0071383	cellular response to steroid hormone stimulus	-8.10163	-5.97504	367,1545,1956,2099,2100,2322,5594,6714	AR,CYP1B1,EGFR,ESR1,ESR2,FLT3,MAPK1,SRC	8/154
6_Member	GO Biological Processes	GO:0050673	epithelial cell proliferation	-7.74535	-5.66528	367,1813,1956,2099,3791,3815,5594,5604	AR,DRD2,EGFR,ESR1,KDR,KIT,MAPK1,MAP2K1	8/171
6_Member	GO Biological Processes	GO:0008406	gonad development	-6.82398	-4.8577	367,1545,1588,2099,3791,3815,4313,6714	AR,CYP1B1,CYP19A1,ESR1,KDR,KIT,MMP2,SRC	8/225
6_Member	GO Biological Processes	GO:0045137	development of primary sexual characteristics	-6.75102	-4.79606	367,1545,1588,2099,3791,3815,4313,6714	AR,CYP1B1,CYP19A1,ESR1,KDR,KIT,MMP2,SRC	8/230
6_Member	GO Biological Processes	GO:0008585	female gonad development	-6.74914	-4.79606	1588,2099,3791,3815,4313,6714	CYP19A1,ESR1,KDR,KIT,MMP2,SRC	6/93
6_Member	GO Biological Processes	GO:0046545	development of primary female sexual characteristics	-6.64004	-4.69977	1588,2099,3791,3815,4313,6714	CYP19A1,ESR1,KDR,KIT,MMP2,SRC	6/97
6_Member	GO Biological Processes	GO:0001541	ovarian follicle development	-6.53116	-4.60577	2099,3791,3815,4313,6714	ESR1,KDR,KIT,MMP2,SRC	5/53
6_Member	GO Biological Processes	GO:0046660	female sex differentiation	-6.26968	-4.38325	1588,2099,3791,3815,4313,6714	CYP19A1,ESR1,KDR,KIT,MMP2,SRC	6/112
6_Member	GO Biological Processes	GO:0030522	intracellular receptor signaling pathway	-6.16231	-4.29401	196,367,2099,2100,3551,5594,6714	AHR,AR,ESR1,ESR2,IKBKB,MAPK1,SRC	7/188
6_Member	GO Biological Processes	GO:0030518	intracellular steroid hormone receptor signaling pathway	-6.15106	-4.28489	367,2099,2100,5594,6714	AR,ESR1,ESR2,MAPK1,SRC	5/63
6_Member	GO Biological Processes	GO:0007548	sex differentiation	-6.09229	-4.24282	367,1545,1588,2099,3791,3815,4313,6714	AR,CYP1B1,CYP19A1,ESR1,KDR,KIT,MMP2,SRC	8/281
6_Member	GO Biological Processes	GO:0030879	mammary gland development	-5.9891	-4.16355	367,1588,2099,5594,6714,7498	AR,CYP19A1,ESR1,MAPK1,SRC,XDH	6/125
6_Member	GO Biological Processes	GO:0042698	ovulation cycle	-5.95261	-4.13665	1545,1956,2099,4313,6714	CYP1B1,EGFR,ESR1,MMP2,SRC	5/69
6_Member	GO Biological Processes	GO:0048608	reproductive structure development	-5.91222	-4.10564	367,1545,1588,2099,3791,3815,4313,6714	AR,CYP1B1,CYP19A1,ESR1,KDR,KIT,MMP2,SRC	8/297
6_Member	GO Biological Processes	GO:0061458	reproductive system development	-5.86887	-4.07328	367,1545,1588,2099,3791,3815,4313,6714	AR,CYP1B1,CYP19A1,ESR1,KDR,KIT,MMP2,SRC	8/301
6_Member	GO Biological Processes	GO:0043401	steroid hormone mediated signaling pathway	-5.65937	-3.91008	367,2099,2100,5594,6714	AR,ESR1,ESR2,MAPK1,SRC	5/79
6_Member	GO Biological Processes	GO:0060736	prostate gland growth	-5.54002	-3.80826	367,1588,2099	AR,CYP19A1,ESR1	3/11
6_Member	GO Biological Processes	GO:0002009	morphogenesis of an epithelium	-5.46458	-3.73748	367,760,768,1956,2099,3791,4313,4321,6714	AR,CA2,CA9,EGFR,ESR1,KDR,MMP2,MMP12,SRC	9/458
6_Member	GO Biological Processes	GO:0007565	female pregnancy	-5.24408	-3.55115	142,367,2099,4313,4318,5743	PARP1,AR,ESR1,MMP2,MMP9,PTGS2	6/168
6_Member	GO Biological Processes	GO:0030850	prostate gland development	-5.16952	-3.48085	367,1588,2099,4313	AR,CYP19A1,ESR1,MMP2	4/46
6_Member	GO Biological Processes	GO:0022612	gland morphogenesis	-5.07103	-3.40486	367,1956,2099,4313,6714	AR,EGFR,ESR1,MMP2,SRC	5/104
6_Member	GO Biological Processes	GO:0044703	multi-organism reproductive process	-4.95184	-3.30751	142,367,2099,4313,4318,5743	PARP1,AR,ESR1,MMP2,MMP9,PTGS2	6/189
6_Member	GO Biological Processes	GO:0044706	multi-multicellular organism process	-4.84965	-3.21791	142,367,2099,4313,4318,5743	PARP1,AR,ESR1,MMP2,MMP9,PTGS2	6/197
6_Member	GO Biological Processes	GO:0061180	mammary gland epithelium development	-4.79516	-3.1659	367,2099,5594,6714	AR,ESR1,MAPK1,SRC	4/57
6_Member	GO Biological Processes	GO:0060135	maternal process involved in female pregnancy	-4.73538	-3.11829	142,367,2099,5743	PARP1,AR,ESR1,PTGS2	4/59
6_Member	GO Biological Processes	GO:0071391	cellular response to estrogen stimulus	-4.70805	-3.09856	367,2099,2100	AR,ESR1,ESR2	3/20
6_Member	GO Biological Processes	GO:0048729	tissue morphogenesis	-4.69386	-3.08626	367,760,768,1956,2099,3791,4313,4321,6714	AR,CA2,CA9,EGFR,ESR1,KDR,MMP2,MMP12,SRC	9/572
6_Member	GO Biological Processes	GO:0060444	branching involved in mammary gland duct morphogenesis	-4.64193	-3.04477	367,2099,6714	AR,ESR1,SRC	3/21
6_Member	GO Biological Processes	GO:0001655	urogenital system development	-4.62199	-3.03052	367,1588,2099,4313	AR,CYP19A1,ESR1,MMP2	4/63
6_Member	GO Biological Processes	GO:0030520	intracellular estrogen receptor signaling pathway	-4.57909	-2.99212	367,2099,2100	AR,ESR1,ESR2	3/22
6_Member	GO Biological Processes	GO:0009755	hormone-mediated signaling pathway	-4.56927	-2.98528	367,2099,2100,5594,6714	AR,ESR1,ESR2,MAPK1,SRC	5/132
6_Member	GO Biological Processes	GO:0060740	prostate gland epithelium morphogenesis	-4.51922	-2.94547	367,2099,4313	AR,ESR1,MMP2	3/23
6_Member	GO Biological Processes	GO:0043627	response to estrogen	-4.44076	-2.88509	367,2099,2100,4313	AR,ESR1,ESR2,MMP2	4/70
6_Member	GO Biological Processes	GO:0060512	prostate gland morphogenesis	-4.40736	-2.85687	367,2099,4313	AR,ESR1,MMP2	3/25
6_Member	GO Biological Processes	GO:0060065	uterus development	-4.35494	-2.81261	1588,2099,6714	CYP19A1,ESR1,SRC	3/26
6_Member	GO Biological Processes	GO:0060603	mammary gland duct morphogenesis	-4.20963	-2.69183	367,2099,6714	AR,ESR1,SRC	3/29
6_Member	GO Biological Processes	GO:0001763	morphogenesis of a branching structure	-3.96392	-2.48548	367,1813,2099,3791,6714	AR,DRD2,ESR1,KDR,SRC	5/177
6_Member	GO Biological Processes	GO:0040007	growth	-3.8784	-2.42187	367,1111,1588,2099,4322,5340,6714	AR,CHEK1,CYP19A1,ESR1,MMP13,PLG,SRC	7/424
6_Member	GO Biological Processes	GO:0048589	developmental growth	-3.8784	-2.42187	367,1111,1588,2099,4322,5340,6714	AR,CHEK1,CYP19A1,ESR1,MMP13,PLG,SRC	7/424
6_Member	GO Biological Processes	GO:0035265	organ growth	-3.72252	-2.29022	367,1588,2099,4322	AR,CYP19A1,ESR1,MMP13	4/107
6_Member	GO Biological Processes	GO:0060443	mammary gland morphogenesis	-3.69261	-2.26694	367,2099,6714	AR,ESR1,SRC	3/43
6_Member	GO Biological Processes	GO:2000241	regulation of reproductive process	-3.58039	-2.17544	367,2099,3815,6714,8654	AR,ESR1,KIT,SRC,PDE5A	5/214
6_Member	GO Biological Processes	GO:0022602	ovulation cycle process	-3.57735	-2.17533	2099,4313,6714	ESR1,MMP2,SRC	3/47
6_Member	GO Biological Processes	GO:0048806	genitalia development	-3.57735	-2.17533	367,1588,2099	AR,CYP19A1,ESR1	3/47
6_Member	GO Biological Processes	GO:0048754	branching morphogenesis of an epithelial tube	-3.31373	-1.95484	367,2099,3791,6714	AR,ESR1,KDR,SRC	4/137
6_Member	GO Biological Processes	GO:0061138	morphogenesis of a branching epithelium	-3.0019	-1.69001	367,2099,3791,6714	AR,ESR1,KDR,SRC	4/166
6_Member	GO Biological Processes	GO:2000243	positive regulation of reproductive process	-2.76661	-1.47674	367,6714,8654	AR,SRC,PDE5A	3/89
6_Member	GO Biological Processes	GO:0050679	positive regulation of epithelial cell proliferation	-2.56244	-1.29682	367,1956,3791,4321	AR,EGFR,KDR,MMP12	4/219
6_Member	GO Biological Processes	GO:0060562	epithelial tube morphogenesis	-2.01442	-0.791413	367,2099,3791,6714	AR,ESR1,KDR,SRC	4/314
7_Summary	GO Biological Processes	GO:0009410	response to xenobiotic stimulus	-14.931	-11.9313	135,196,768,873,983,1019,1544,1545,1813,1956,3932,4129,4313,4363,5243,5743,6714,9429,1080	ADORA2A,AHR,CA9,CBR1,CDK1,CDK4,CYP1A2,CYP1B1,DRD2,EGFR,LCK,MAOB,MMP2,ABCC1,ABCB1,PTGS2,SRC,ABCG2,CFTR	19/-
7_Member	GO Biological Processes	GO:0009410	response to xenobiotic stimulus	-14.931	-11.9313	135,196,768,873,983,1019,1544,1545,1813,1956,3932,4129,4313,4363,5243,5743,6714	ADORA2A,AHR,CA9,CBR1,CDK1,CDK4,CYP1A2,CYP1B1,DRD2,EGFR,LCK,MAOB,MMP2,ABCC1,ABCB1,PTGS2,SRC	17/428
7_Member	GO Biological Processes	GO:1990962	xenobiotic transport across blood-brain barrier	-6.45233	-4.5342	4363,5243,9429	ABCC1,ABCB1,ABCG2	3/6
7_Member	GO Biological Processes	GO:0071466	cellular response to xenobiotic stimulus	-6.08581	-4.23839	196,873,1544,1545,1956,4363,5243	AHR,CBR1,CYP1A2,CYP1B1,EGFR,ABCC1,ABCB1	7/193
7_Member	GO Biological Processes	GO:0006805	xenobiotic metabolic process	-5.96882	-4.14797	196,873,1544,1545,4363,5243	AHR,CBR1,CYP1A2,CYP1B1,ABCC1,ABCB1	6/126
7_Member	GO Biological Processes	GO:0070633	transepithelial transport	-5.81418	-4.03632	1080,4363,5243,9429	CFTR,ABCC1,ABCB1,ABCG2	4/32
7_Member	GO Biological Processes	GO:0042908	xenobiotic transport	-3.55015	-2.15466	4363,5243,9429	ABCC1,ABCB1,ABCG2	3/48
7_Member	GO Biological Processes	GO:0140115	export across plasma membrane	-3.26371	-1.91203	4363,5243,9429	ABCC1,ABCB1,ABCG2	3/60
7_Member	GO Biological Processes	GO:0010232	vascular transport	-2.80934	-1.51435	4363,5243,9429	ABCC1,ABCB1,ABCG2	3/86
7_Member	GO Biological Processes	GO:0150104	transport across blood-brain barrier	-2.80934	-1.51435	4363,5243,9429	ABCC1,ABCB1,ABCG2	3/86
7_Member	GO Biological Processes	GO:0042886	amide transport	-2.22136	-0.983074	4363,5243,9429	ABCC1,ABCB1,ABCG2	3/139
8_Summary	GO Biological Processes	GO:0002683	negative regulation of immune system process	-14.691	-11.7194	135,142,196,246,383,1021,1588,1813,2534,4321,5295,5320,5591,5802,6714,6850,7430,8654,1612,2099,3551,5595,5770,239,240,5340,6480	ADORA2A,PARP1,AHR,ALOX15,ARG1,CDK6,CYP19A1,DRD2,FYN,MMP12,PIK3R1,PLA2G2A,PRKDC,PTPRS,SRC,SYK,EZR,PDE5A,DAPK1,ESR1,IKBKB,MAPK3,PTPN1,ALOX12,ALOX5,PLG,ST6GAL1	27/-
8_Member	GO Biological Processes	GO:0002683	negative regulation of immune system process	-14.691	-11.7194	135,142,196,246,383,1021,1588,1813,2534,4321,5295,5320,5591,5802,6714,6850,7430,8654	ADORA2A,PARP1,AHR,ALOX15,ARG1,CDK6,CYP19A1,DRD2,FYN,MMP12,PIK3R1,PLA2G2A,PRKDC,PTPRS,SRC,SYK,EZR,PDE5A	18/526
8_Member	GO Biological Processes	GO:0002831	regulation of response to biotic stimulus	-12.3008	-9.64347	142,196,383,1612,1813,2099,2534,3551,4321,5295,5591,5595,5770,5802,6714,6850	PARP1,AHR,ARG1,DAPK1,DRD2,ESR1,FYN,IKBKB,MMP12,PIK3R1,PRKDC,MAPK3,PTPN1,PTPRS,SRC,SYK	16/524
8_Member	GO Biological Processes	GO:0032102	negative regulation of response to external stimulus	-12.0407	-9.39643	135,142,196,239,240,383,1588,1813,2534,4321,5340,5802,6480,6714,6850	ADORA2A,PARP1,AHR,ALOX12,ALOX5,ARG1,CYP19A1,DRD2,FYN,MMP12,PLG,PTPRS,ST6GAL1,SRC,SYK	15/453
8_Member	GO Biological Processes	GO:0045088	regulation of innate immune response	-9.85249	-7.42487	142,383,1813,2099,2534,3551,4321,5295,5591,5770,5802,6714,6850	PARP1,ARG1,DRD2,ESR1,FYN,IKBKB,MMP12,PIK3R1,PRKDC,PTPN1,PTPRS,SRC,SYK	13/440
8_Member	GO Biological Processes	GO:0031348	negative regulation of defense response	-9.50774	-7.15148	135,142,196,240,383,1588,1813,2534,4321,6714,6850	ADORA2A,PARP1,AHR,ALOX5,ARG1,CYP19A1,DRD2,FYN,MMP12,SRC,SYK	11/291
8_Member	GO Biological Processes	GO:0050777	negative regulation of immune response	-8.62681	-6.4148	142,196,246,383,1813,2534,4321,6714,6850	PARP1,AHR,ALOX15,ARG1,DRD2,FYN,MMP12,SRC,SYK	9/194
8_Member	GO Biological Processes	GO:0002832	negative regulation of response to biotic stimulus	-4.78647	-3.15844	142,196,383,1813,4321	PARP1,AHR,ARG1,DRD2,MMP12	5/119
8_Member	GO Biological Processes	GO:0045824	negative regulation of innate immune response	-4.05102	-2.55736	142,383,1813,4321	PARP1,ARG1,DRD2,MMP12	4/88
9_Summary	GO Biological Processes	GO:0050804	modulation of chemical synaptic transmission	-12.7038	-9.96169	43,135,140,760,1139,1813,1956,2534,2932,3815,4915,5340,5594,5595,5743,5802,6714,238,4985,4313,367,7465,50507,7430,3932	ACHE,ADORA2A,ADORA3,CA2,CHRNA7,DRD2,EGFR,FYN,GSK3B,KIT,NTRK2,PLG,MAPK1,MAPK3,PTGS2,PTPRS,SRC,ALK,OPRD1,MMP2,AR,WEE1,NOX4,EZR,LCK	25/-
9_Member	GO Biological Processes	GO:0050804	modulation of chemical synaptic transmission	-12.7038	-9.96169	43,135,140,760,1139,1813,1956,2534,2932,3815,4915,5340,5594,5595,5743,5802	ACHE,ADORA2A,ADORA3,CA2,CHRNA7,DRD2,EGFR,FYN,GSK3B,KIT,NTRK2,PLG,MAPK1,MAPK3,PTGS2,PTPRS	16/493
9_Member	GO Biological Processes	GO:0099177	regulation of trans-synaptic signaling	-12.6903	-9.96169	43,135,140,760,1139,1813,1956,2534,2932,3815,4915,5340,5594,5595,5743,5802	ACHE,ADORA2A,ADORA3,CA2,CHRNA7,DRD2,EGFR,FYN,GSK3B,KIT,NTRK2,PLG,MAPK1,MAPK3,PTGS2,PTPRS	16/494
9_Member	GO Biological Processes	GO:0050806	positive regulation of synaptic transmission	-8.05759	-5.93487	135,760,1139,1813,1956,4915,5594,5743	ADORA2A,CA2,CHRNA7,DRD2,EGFR,NTRK2,MAPK1,PTGS2	8/156
9_Member	GO Biological Processes	GO:0007611	learning or memory	-7.27286	-5.25542	1139,1813,1956,2534,3815,4915,5594,5743,6714	CHRNA7,DRD2,EGFR,FYN,KIT,NTRK2,MAPK1,PTGS2,SRC	9/278
9_Member	GO Biological Processes	GO:0007610	behavior	-7.09039	-5.09356	135,238,1139,1813,1956,2534,3815,4915,4985,5594,5743,6714	ADORA2A,ALK,CHRNA7,DRD2,EGFR,FYN,KIT,NTRK2,OPRD1,MAPK1,PTGS2,SRC	12/619
9_Member	GO Biological Processes	GO:0048167	regulation of synaptic plasticity	-6.95984	-4.97437	135,1139,1813,2932,3815,4915,5594,5743	ADORA2A,CHRNA7,DRD2,GSK3B,KIT,NTRK2,MAPK1,PTGS2	8/216
9_Member	GO Biological Processes	GO:0050890	cognition	-6.73119	-4.78069	1139,1813,1956,2534,3815,4915,5594,5743,6714	CHRNA7,DRD2,EGFR,FYN,KIT,NTRK2,MAPK1,PTGS2,SRC	9/322
9_Member	GO Biological Processes	GO:0099537	trans-synaptic signaling	-5.67117	-3.92025	43,135,1139,1813,2932,4915,5340,5594,5802	ACHE,ADORA2A,CHRNA7,DRD2,GSK3B,NTRK2,PLG,MAPK1,PTPRS	9/432
9_Member	GO Biological Processes	GO:0099536	synaptic signaling	-5.44159	-3.72064	43,135,1139,1813,2932,4915,5340,5594,5802	ACHE,ADORA2A,CHRNA7,DRD2,GSK3B,NTRK2,PLG,MAPK1,PTPRS	9/461
9_Member	GO Biological Processes	GO:1900271	regulation of long-term synaptic potentiation	-5.13176	-3.4515	135,1139,1813,2932	ADORA2A,CHRNA7,DRD2,GSK3B	4/47
9_Member	GO Biological Processes	GO:0035094	response to nicotine	-5.02338	-3.36872	1139,1813,4313,5594	CHRNA7,DRD2,MMP2,MAPK1	4/50
9_Member	GO Biological Processes	GO:1900273	positive regulation of long-term synaptic potentiation	-4.57909	-2.99212	135,1139,1813	ADORA2A,CHRNA7,DRD2	3/22
9_Member	GO Biological Processes	GO:0060079	excitatory postsynaptic potential	-4.49051	-2.92216	135,1139,1813,2932	ADORA2A,CHRNA7,DRD2,GSK3B	4/68
9_Member	GO Biological Processes	GO:0099565	chemical synaptic transmission, postsynaptic	-4.34562	-2.8043	135,1139,1813,2932	ADORA2A,CHRNA7,DRD2,GSK3B	4/74
9_Member	GO Biological Processes	GO:0060078	regulation of postsynaptic membrane potential	-3.72252	-2.29022	135,1139,1813,2932	ADORA2A,CHRNA7,DRD2,GSK3B	4/107
9_Member	GO Biological Processes	GO:0106027	neuron projection organization	-3.66277	-2.24369	1139,2534,2932	CHRNA7,FYN,GSK3B	3/44
9_Member	GO Biological Processes	GO:0000902	cell morphogenesis	-3.35862	-1.99305	135,367,1139,1813,1956,2534,7465,50507	ADORA2A,AR,CHRNA7,DRD2,EGFR,FYN,WEE1,NOX4	8/681
9_Member	GO Biological Processes	GO:0031175	neuron projection development	-3.31689	-1.95667	135,1139,1813,1956,2534,2932,4313,7465	ADORA2A,CHRNA7,DRD2,EGFR,FYN,GSK3B,MMP2,WEE1	8/691
9_Member	GO Biological Processes	GO:0007268	chemical synaptic transmission	-3.08797	-1.76097	43,135,1139,1813,2932,5594	ACHE,ADORA2A,CHRNA7,DRD2,GSK3B,MAPK1	6/415
9_Member	GO Biological Processes	GO:0098916	anterograde trans-synaptic signaling	-3.08797	-1.76097	43,135,1139,1813,2932,5594	ACHE,ADORA2A,CHRNA7,DRD2,GSK3B,MAPK1	6/415
9_Member	GO Biological Processes	GO:0048812	neuron projection morphogenesis	-2.74721	-1.46127	135,1139,1813,1956,2534,7465	ADORA2A,CHRNA7,DRD2,EGFR,FYN,WEE1	6/484
9_Member	GO Biological Processes	GO:0120039	plasma membrane bounded cell projection morphogenesis	-2.7248	-1.44165	135,1139,1813,1956,2534,7465	ADORA2A,CHRNA7,DRD2,EGFR,FYN,WEE1	6/489
9_Member	GO Biological Processes	GO:0048858	cell projection morphogenesis	-2.70266	-1.42117	135,1139,1813,1956,2534,7465	ADORA2A,CHRNA7,DRD2,EGFR,FYN,WEE1	6/494
9_Member	GO Biological Processes	GO:0099173	postsynapse organization	-2.52749	-1.26444	1139,2534,7430	CHRNA7,FYN,EZR	3/108
9_Member	GO Biological Processes	GO:0006816	calcium ion transport	-2.34543	-1.097	1139,1813,2534,3932	CHRNA7,DRD2,FYN,LCK	4/252
9_Member	GO Biological Processes	GO:0032989	cellular anatomical entity morphogenesis	-2.27196	-1.03167	135,1139,1813,1956,2534,7465	ADORA2A,CHRNA7,DRD2,EGFR,FYN,WEE1	6/605
10_Summary	GO Biological Processes	GO:2001233	regulation of apoptotic signaling pathway	-11.6302	-9.04545	135,142,367,1457,2534,2932,3932,4170,4313,4318,5743,5770,6714,7015,383,1545,1612,5591,6850,1813,2099,5595,7430,7498	ADORA2A,PARP1,AR,CSNK2A1,FYN,GSK3B,LCK,MCL1,MMP2,MMP9,PTGS2,PTPN1,SRC,TERT,ARG1,CYP1B1,DAPK1,PRKDC,SYK,DRD2,ESR1,MAPK3,EZR,XDH	24/-
10_Member	GO Biological Processes	GO:2001233	regulation of apoptotic signaling pathway	-11.6302	-9.04545	135,142,367,1457,2534,2932,3932,4170,4313,4318,5743,5770,6714,7015	ADORA2A,PARP1,AR,CSNK2A1,FYN,GSK3B,LCK,MCL1,MMP2,MMP9,PTGS2,PTPN1,SRC,TERT	14/396
10_Member	GO Biological Processes	GO:0043068	positive regulation of programmed cell death	-9.50065	-7.15092	135,142,383,1545,1612,2932,3932,4170,4313,4318,5591,5743,6714,6850	ADORA2A,PARP1,ARG1,CYP1B1,DAPK1,GSK3B,LCK,MCL1,MMP2,MMP9,PRKDC,PTGS2,SRC,SYK	14/574
10_Member	GO Biological Processes	GO:2001234	negative regulation of apoptotic signaling pathway	-9.0166	-6.71537	367,1457,2534,2932,4170,4318,5743,5770,6714,7015	AR,CSNK2A1,FYN,GSK3B,MCL1,MMP9,PTGS2,PTPN1,SRC,TERT	10/244
10_Member	GO Biological Processes	GO:2001242	regulation of intrinsic apoptotic signaling pathway	-8.70632	-6.46502	142,2534,3932,4170,4313,4318,5743,5770,6714	PARP1,FYN,LCK,MCL1,MMP2,MMP9,PTGS2,PTPN1,SRC	9/190
10_Member	GO Biological Processes	GO:0043065	positive regulation of apoptotic process	-6.64819	-4.70538	135,1545,1612,2932,3932,4170,4313,4318,5591,5743,6714	ADORA2A,CYP1B1,DAPK1,GSK3B,LCK,MCL1,MMP2,MMP9,PRKDC,PTGS2,SRC	11/552
10_Member	GO Biological Processes	GO:1902532	negative regulation of intracellular signal transduction	-6.35487	-4.4601	1813,2099,2534,2932,4318,5595,5743,5770,6714,7430,7498	DRD2,ESR1,FYN,GSK3B,MMP9,MAPK3,PTGS2,PTPN1,SRC,EZR,XDH	11/591
10_Member	GO Biological Processes	GO:2001243	negative regulation of intrinsic apoptotic signaling pathway	-4.87685	-3.24013	2534,4318,5743,5770,6714	FYN,MMP9,PTGS2,PTPN1,SRC	5/114
11_Summary	GO Biological Processes	GO:0050727	regulation of inflammatory response	-11.2194	-8.66683	135,196,240,246,1588,2099,2534,4314,4318,4363,5320,5743,6714,6850,383,3551,3791,4321,5340,5591,5594,5595,140,983,1813,3932,4313,231,239,1080,1956,7498,3815,1457,1612,2932,4915,1017,142,5321	ADORA2A,AHR,ALOX5,ALOX15,CYP19A1,ESR1,FYN,MMP3,MMP9,ABCC1,PLA2G2A,PTGS2,SRC,SYK,ARG1,IKBKB,KDR,MMP12,PLG,PRKDC,MAPK1,MAPK3,ADORA3,CDK1,DRD2,LCK,MMP2,AKR1B1,ALOX12,CFTR,EGFR,XDH,KIT,CSNK2A1,DAPK1,GSK3B,NTRK2,CDK2,PARP1,PLA2G4A	40/-
11_Member	GO Biological Processes	GO:0050727	regulation of inflammatory response	-11.2194	-8.66683	135,196,240,246,1588,2099,2534,4314,4318,4363,5320,5743,6714,6850	ADORA2A,AHR,ALOX5,ALOX15,CYP19A1,ESR1,FYN,MMP3,MMP9,ABCC1,PLA2G2A,PTGS2,SRC,SYK	14/425
11_Member	GO Biological Processes	GO:0032103	positive regulation of response to external stimulus	-9.62992	-7.24651	383,2534,3551,3791,4321,4363,5320,5340,5591,5594,5595,5743,6714,6850	ARG1,FYN,IKBKB,KDR,MMP12,ABCC1,PLA2G2A,PLG,PRKDC,MAPK1,MAPK3,PTGS2,SRC,SYK	14/561
11_Member	GO Biological Processes	GO:0009611	response to wounding	-8.88356	-6.62157	135,140,246,983,1813,3791,3932,4313,4321,5340,6714,6850	ADORA2A,ADORA3,ALOX15,CDK1,DRD2,KDR,LCK,MMP2,MMP12,PLG,SRC,SYK	12/426
11_Member	GO Biological Processes	GO:0050878	regulation of body fluid levels	-8.62687	-6.4148	135,231,239,1080,1813,1956,3932,5340,6714,6850,7498	ADORA2A,AKR1B1,ALOX12,CFTR,DRD2,EGFR,LCK,PLG,SRC,SYK,XDH	11/353
11_Member	GO Biological Processes	GO:0038093	Fc receptor signaling pathway	-8.28519	-6.11124	2534,3551,3815,3932,6714,6850	FYN,IKBKB,KIT,LCK,SRC,SYK	6/52
11_Member	GO Biological Processes	GO:0051336	regulation of hydrolase activity	-8.04521	-5.93359	1457,1612,1956,2099,2534,2932,3551,3815,3932,4318,4915,6714,6850,7498	CSNK2A1,DAPK1,EGFR,ESR1,FYN,GSK3B,IKBKB,KIT,LCK,MMP9,NTRK2,SRC,SYK,XDH	14/746
11_Member	GO Biological Processes	GO:0031349	positive regulation of defense response	-7.82571	-5.73269	383,2534,3551,4321,4363,5320,5591,5595,5743,6714,6850	ARG1,FYN,IKBKB,MMP12,ABCC1,PLA2G2A,PRKDC,MAPK3,PTGS2,SRC,SYK	11/422
11_Member	GO Biological Processes	GO:2000116	regulation of cysteine-type endopeptidase activity	-7.38944	-5.35352	1457,1612,2534,3932,4318,6714,6850,7498	CSNK2A1,DAPK1,FYN,LCK,MMP9,SRC,SYK,XDH	8/190
11_Member	GO Biological Processes	GO:0043281	regulation of cysteine-type endopeptidase activity involved in apoptotic process	-6.63563	-4.69788	1457,1612,3932,4318,6714,6850,7498	CSNK2A1,DAPK1,LCK,MMP9,SRC,SYK,XDH	7/160
11_Member	GO Biological Processes	GO:0002223	stimulatory C-type lectin receptor signaling pathway	-6.41497	-4.50868	2534,3551,6714,6850	FYN,IKBKB,SRC,SYK	4/23
11_Member	GO Biological Processes	GO:1990840	response to lectin	-6.41497	-4.50868	2534,3551,6714,6850	FYN,IKBKB,SRC,SYK	4/23
11_Member	GO Biological Processes	GO:1990858	cellular response to lectin	-6.41497	-4.50868	2534,3551,6714,6850	FYN,IKBKB,SRC,SYK	4/23
11_Member	GO Biological Processes	GO:0052548	regulation of endopeptidase activity	-6.10391	-4.25033	1457,1612,2534,3932,4318,6714,6850,7498	CSNK2A1,DAPK1,FYN,LCK,MMP9,SRC,SYK,XDH	8/280
11_Member	GO Biological Processes	GO:0038094	Fc-gamma receptor signaling pathway	-6.05529	-4.21595	2534,3932,6714,6850	FYN,LCK,SRC,SYK	4/28
11_Member	GO Biological Processes	GO:0050728	negative regulation of inflammatory response	-5.96775	-4.14797	135,196,240,1588,2534,6714,6850	ADORA2A,AHR,ALOX5,CYP19A1,FYN,SRC,SYK	7/201
11_Member	GO Biological Processes	GO:0052547	regulation of peptidase activity	-5.83676	-4.04846	1457,1612,2534,3932,4318,6714,6850,7498	CSNK2A1,DAPK1,FYN,LCK,MMP9,SRC,SYK,XDH	8/304
11_Member	GO Biological Processes	GO:0042060	wound healing	-5.69142	-3.93886	135,246,3791,3932,4321,5340,6714,6850	ADORA2A,ALOX15,KDR,LCK,MMP12,PLG,SRC,SYK	8/318
11_Member	GO Biological Processes	GO:0030162	regulation of proteolysis	-5.38739	-3.67099	1017,1457,1612,2534,2932,3932,4318,6714,6850,7498	CDK2,CSNK2A1,DAPK1,FYN,GSK3B,LCK,MMP9,SRC,SYK,XDH	10/600
11_Member	GO Biological Processes	GO:0051345	positive regulation of hydrolase activity	-5.28531	-3.58518	1612,1956,2099,2534,2932,3815,3932,6850,7498	DAPK1,EGFR,ESR1,FYN,GSK3B,KIT,LCK,SYK,XDH	9/482
11_Member	GO Biological Processes	GO:0002768	immune response-regulating cell surface receptor signaling pathway	-5.0294	-3.37211	2534,3551,3815,3932,5594,6714,6850	FYN,IKBKB,KIT,LCK,MAPK1,SRC,SYK	7/279
11_Member	GO Biological Processes	GO:0002833	positive regulation of response to biotic stimulus	-4.76126	-3.14056	383,2534,3551,4321,5591,6714,6850	ARG1,FYN,IKBKB,MMP12,PRKDC,SRC,SYK	7/307
11_Member	GO Biological Processes	GO:0002433	immune response-regulating cell surface receptor signaling pathway involved in phagocytosis	-4.70805	-3.09856	2534,6714,6850	FYN,SRC,SYK	3/20
11_Member	GO Biological Processes	GO:0038096	Fc-gamma receptor signaling pathway involved in phagocytosis	-4.70805	-3.09856	2534,6714,6850	FYN,SRC,SYK	3/20
11_Member	GO Biological Processes	GO:2001056	positive regulation of cysteine-type endopeptidase activity	-4.64998	-3.04668	1612,2534,3932,6850,7498	DAPK1,FYN,LCK,SYK,XDH	5/127
11_Member	GO Biological Processes	GO:0002431	Fc receptor mediated stimulatory signaling pathway	-4.57909	-2.99212	2534,6714,6850	FYN,SRC,SYK	3/22
11_Member	GO Biological Processes	GO:0002220	innate immune response activating cell surface receptor signaling pathway	-4.54183	-2.96482	2534,3551,6714,6850	FYN,IKBKB,SRC,SYK	4/66
11_Member	GO Biological Processes	GO:0045862	positive regulation of proteolysis	-4.5108	-2.93922	1612,2534,2932,3932,6714,6850,7498	DAPK1,FYN,GSK3B,LCK,SRC,SYK,XDH	7/336
11_Member	GO Biological Processes	GO:0045087	innate immune response	-4.42949	-2.87694	142,383,1612,2534,3551,3932,4314,5591,6714,6850	PARP1,ARG1,DAPK1,FYN,IKBKB,LCK,MMP3,PRKDC,SRC,SYK	10/775
11_Member	GO Biological Processes	GO:0002764	immune response-regulating signaling pathway	-4.38276	-2.83433	2534,3551,3815,3932,5594,6714,6850	FYN,IKBKB,KIT,LCK,MAPK1,SRC,SYK	7/352
11_Member	GO Biological Processes	GO:0002429	immune response-activating cell surface receptor signaling pathway	-4.28909	-2.75674	2534,3551,3932,5594,6714,6850	FYN,IKBKB,LCK,MAPK1,SRC,SYK	6/248
11_Member	GO Biological Processes	GO:0010950	positive regulation of endopeptidase activity	-4.26283	-2.73927	1612,2534,3932,6850,7498	DAPK1,FYN,LCK,SYK,XDH	5/153
11_Member	GO Biological Processes	GO:0050778	positive regulation of immune response	-4.24227	-2.72043	2534,3551,3932,4321,5321,5591,5594,6714,6850	FYN,IKBKB,LCK,MMP12,PLA2G4A,PRKDC,MAPK1,SRC,SYK	9/654
11_Member	GO Biological Processes	GO:0006909	phagocytosis	-4.18356	-2.66957	135,246,2534,6714,6850	ADORA2A,ALOX15,FYN,SRC,SYK	5/159
11_Member	GO Biological Processes	GO:0050851	antigen receptor-mediated signaling pathway	-4.18356	-2.66957	2534,3551,3932,5594,6850	FYN,IKBKB,LCK,MAPK1,SYK	5/159
11_Member	GO Biological Processes	GO:0002253	activation of immune response	-4.13828	-2.63086	2534,3551,3932,5591,5594,6714,6850	FYN,IKBKB,LCK,PRKDC,MAPK1,SRC,SYK	7/385
11_Member	GO Biological Processes	GO:0002218	activation of innate immune response	-4.08277	-2.58549	2534,3551,5591,6714,6850	FYN,IKBKB,PRKDC,SRC,SYK	5/167
11_Member	GO Biological Processes	GO:0010952	positive regulation of peptidase activity	-4.08277	-2.58549	1612,2534,3932,6850,7498	DAPK1,FYN,LCK,SYK,XDH	5/167
11_Member	GO Biological Processes	GO:0002862	negative regulation of inflammatory response to antigenic stimulus	-4.03883	-2.54698	2534,6714,6850	FYN,SRC,SYK	3/33
11_Member	GO Biological Processes	GO:0007596	blood coagulation	-3.99879	-2.51496	135,3932,5340,6714,6850	ADORA2A,LCK,PLG,SRC,SYK	5/174
11_Member	GO Biological Processes	GO:0045089	positive regulation of innate immune response	-3.99035	-2.50827	2534,3551,4321,5591,6714,6850	FYN,IKBKB,MMP12,PRKDC,SRC,SYK	6/281
11_Member	GO Biological Processes	GO:0050817	coagulation	-3.97547	-2.49427	135,3932,5340,6714,6850	ADORA2A,LCK,PLG,SRC,SYK	5/176
11_Member	GO Biological Processes	GO:0007599	hemostasis	-3.92968	-2.45974	135,3932,5340,6714,6850	ADORA2A,LCK,PLG,SRC,SYK	5/180
11_Member	GO Biological Processes	GO:0002757	immune response-activating signaling pathway	-3.69147	-2.26694	2534,3551,3932,5594,6714,6850	FYN,IKBKB,LCK,MAPK1,SRC,SYK	6/319
11_Member	GO Biological Processes	GO:0031295	T cell costimulation	-3.66277	-2.24369	2534,3932,6714	FYN,LCK,SRC	3/44
11_Member	GO Biological Processes	GO:0043280	positive regulation of cysteine-type endopeptidase activity involved in apoptotic process	-3.66133	-2.24369	1612,3932,6850,7498	DAPK1,LCK,SYK,XDH	4/111
11_Member	GO Biological Processes	GO:0031294	lymphocyte costimulation	-3.63363	-2.21976	2534,3932,6714	FYN,LCK,SRC	3/45
11_Member	GO Biological Processes	GO:0050852	T cell receptor signaling pathway	-3.63162	-2.2185	2534,3551,3932,5594	FYN,IKBKB,LCK,MAPK1	4/113
11_Member	GO Biological Processes	GO:0002861	regulation of inflammatory response to antigenic stimulus	-3.55015	-2.15466	2534,6714,6850	FYN,SRC,SYK	3/48
11_Member	GO Biological Processes	GO:0002696	positive regulation of leukocyte activation	-3.39842	-2.03015	2534,3932,5321,5591,6714,6850	FYN,LCK,PLA2G4A,PRKDC,SRC,SYK	6/362
11_Member	GO Biological Processes	GO:0050853	B cell receptor signaling pathway	-3.307	-1.94942	3932,5594,6850	LCK,MAPK1,SYK	3/58
11_Member	GO Biological Processes	GO:0050867	positive regulation of cell activation	-3.28739	-1.93244	2534,3932,5321,5591,6714,6850	FYN,LCK,PLA2G4A,PRKDC,SRC,SYK	6/380
11_Member	GO Biological Processes	GO:0002758	innate immune response-activating signaling pathway	-3.25511	-1.90474	2534,3551,6714,6850	FYN,IKBKB,SRC,SYK	4/142
11_Member	GO Biological Processes	GO:1903039	positive regulation of leukocyte cell-cell adhesion	-3.07145	-1.7469	240,2534,3932,6714,6850	ALOX5,FYN,LCK,SRC,SYK	5/277
11_Member	GO Biological Processes	GO:0022409	positive regulation of cell-cell adhesion	-2.76471	-1.4754	240,2534,3932,6714,6850	ALOX5,FYN,LCK,SRC,SYK	5/325
11_Member	GO Biological Processes	GO:0051251	positive regulation of lymphocyte activation	-2.74729	-1.46127	2534,3932,5591,6714,6850	FYN,LCK,PRKDC,SRC,SYK	5/328
11_Member	GO Biological Processes	GO:0030168	platelet activation	-2.62217	-1.35217	3932,6714,6850	LCK,SRC,SYK	3/100
11_Member	GO Biological Processes	GO:0050870	positive regulation of T cell activation	-2.33937	-1.09248	2534,3932,6714,6850	FYN,LCK,SRC,SYK	4/253
12_Summary	GO Biological Processes	GO:0048511	rhythmic process	-11.1962	-8.65388	196,983,1457,1545,1813,1956,2099,2932,4313,4915,5591,6714,43,3791,3815,5594,5595,5604,6850,8654,2534,5743,5802,238	AHR,CDK1,CSNK2A1,CYP1B1,DRD2,EGFR,ESR1,GSK3B,MMP2,NTRK2,PRKDC,SRC,ACHE,KDR,KIT,MAPK1,MAPK3,MAP2K1,SYK,PDE5A,FYN,PTGS2,PTPRS,ALK	24/-
12_Member	GO Biological Processes	GO:0048511	rhythmic process	-11.1962	-8.65388	196,983,1457,1545,1813,1956,2099,2932,4313,4915,5591,6714	AHR,CDK1,CSNK2A1,CYP1B1,DRD2,EGFR,ESR1,GSK3B,MMP2,NTRK2,PRKDC,SRC	12/268
12_Member	GO Biological Processes	GO:0007423	sensory organ development	-4.64069	-3.04468	43,1545,1813,1956,3791,3815,4915,5594,5595	ACHE,CYP1B1,DRD2,EGFR,KDR,KIT,NTRK2,MAPK1,MAPK3	9/581
12_Member	GO Biological Processes	GO:0010720	positive regulation of cell development	-4.5678	-2.98528	1813,1956,3815,4915,5591,5604,6850,8654	DRD2,EGFR,KIT,NTRK2,PRKDC,MAP2K1,SYK,PDE5A	8/454
12_Member	GO Biological Processes	GO:0007623	circadian rhythm	-4.50703	-2.93653	196,1813,1956,2932,4915	AHR,DRD2,EGFR,GSK3B,NTRK2	5/136
12_Member	GO Biological Processes	GO:0007612	learning	-4.26283	-2.73927	1813,2534,3815,4915,5743	DRD2,FYN,KIT,NTRK2,PTGS2	5/153
12_Member	GO Biological Processes	GO:0071230	cellular response to amino acid stimulus	-4.08992	-2.59081	1956,2534,4313,4915	EGFR,FYN,MMP2,NTRK2	4/86
12_Member	GO Biological Processes	GO:0071229	cellular response to acid chemical	-3.92189	-2.45621	1956,2534,4313,4915	EGFR,FYN,MMP2,NTRK2	4/95
12_Member	GO Biological Processes	GO:0043010	camera-type eye development	-3.57744	-2.17533	43,1545,1813,1956,3791,4915	ACHE,CYP1B1,DRD2,EGFR,KDR,NTRK2	6/335
12_Member	GO Biological Processes	GO:0043200	response to amino acid	-3.4777	-2.08936	1956,2534,4313,4915	EGFR,FYN,MMP2,NTRK2	4/124
12_Member	GO Biological Processes	GO:0050769	positive regulation of neurogenesis	-3.3036	-1.94669	1813,1956,3815,4915,5604	DRD2,EGFR,KIT,NTRK2,MAP2K1	5/246
12_Member	GO Biological Processes	GO:0001101	response to acid chemical	-3.29001	-1.93441	1956,2534,4313,4915	EGFR,FYN,MMP2,NTRK2	4/139
12_Member	GO Biological Processes	GO:0001654	eye development	-3.2814	-1.92711	43,1545,1813,1956,3791,4915	ACHE,CYP1B1,DRD2,EGFR,KDR,NTRK2	6/381
12_Member	GO Biological Processes	GO:0150063	visual system development	-3.25762	-1.90659	43,1545,1813,1956,3791,4915	ACHE,CYP1B1,DRD2,EGFR,KDR,NTRK2	6/385
12_Member	GO Biological Processes	GO:0048880	sensory system development	-3.22248	-1.87771	43,1545,1813,1956,3791,4915	ACHE,CYP1B1,DRD2,EGFR,KDR,NTRK2	6/391
12_Member	GO Biological Processes	GO:0050767	regulation of neurogenesis	-3.21091	-1.86906	1813,1956,3815,4915,5604,5802	DRD2,EGFR,KIT,NTRK2,MAP2K1,PTPRS	6/393
12_Member	GO Biological Processes	GO:0051962	positive regulation of nervous system development	-2.9563	-1.64914	1813,1956,3815,4915,5604	DRD2,EGFR,KIT,NTRK2,MAP2K1	5/294
12_Member	GO Biological Processes	GO:0051960	regulation of nervous system development	-2.82084	-1.52356	1813,1956,3815,4915,5604,5802	DRD2,EGFR,KIT,NTRK2,MAP2K1,PTPRS	6/468
12_Member	GO Biological Processes	GO:0050807	regulation of synapse organization	-2.40126	-1.14714	1813,2534,4915,5802	DRD2,FYN,NTRK2,PTPRS	4/243
12_Member	GO Biological Processes	GO:0050803	regulation of synapse structure or activity	-2.36378	-1.11381	1813,2534,4915,5802	DRD2,FYN,NTRK2,PTPRS	4/249
12_Member	GO Biological Processes	GO:0001764	neuron migration	-2.19579	-0.961498	1813,2534,4915	DRD2,FYN,NTRK2	3/142
12_Member	GO Biological Processes	GO:0060041	retina development in camera-type eye	-2.09149	-0.863613	43,1545,4915	ACHE,CYP1B1,NTRK2	3/155
12_Member	GO Biological Processes	GO:0010976	positive regulation of neuron projection development	-2.04658	-0.821634	238,2534,4915	ALK,FYN,NTRK2	3/161
13_Summary	GO Biological Processes	GO:0009636	response to toxic substance	-10.3997	-7.92282	196,983,1545,1813,4129,4985,5243,5742,5743,9429,57016	AHR,CDK1,CYP1B1,DRD2,MAOB,OPRD1,ABCB1,PTGS1,PTGS2,ABCG2,AKR1B10	11/-
13_Member	GO Biological Processes	GO:0009636	response to toxic substance	-10.3997	-7.92282	196,983,1545,1813,4129,4985,5243,5742,5743,9429,57016	AHR,CDK1,CYP1B1,DRD2,MAOB,OPRD1,ABCB1,PTGS1,PTGS2,ABCG2,AKR1B10	11/240
13_Member	GO Biological Processes	GO:0097237	cellular response to toxic substance	-6.07199	-4.23064	1545,4985,5742,5743,9429,57016	CYP1B1,OPRD1,PTGS1,PTGS2,ABCG2,AKR1B10	6/121
13_Member	GO Biological Processes	GO:0098754	detoxification	-4.47664	-2.91044	5243,5742,5743,9429,57016	ABCB1,PTGS1,PTGS2,ABCG2,AKR1B10	5/138
13_Member	GO Biological Processes	GO:1990748	cellular detoxification	-3.66133	-2.24369	5742,5743,9429,57016	PTGS1,PTGS2,ABCG2,AKR1B10	4/111
14_Summary	GO Biological Processes	GO:0003013	circulatory system process	-10.1934	-7.74185	135,367,1813,1956,2534,4313,4363,5243,5742,5743,6714,6916,9429,50507,246,2932,5802,7430,4915,4985,1021	ADORA2A,AR,DRD2,EGFR,FYN,MMP2,ABCC1,ABCB1,PTGS1,PTGS2,SRC,TBXAS1,ABCG2,NOX4,ALOX15,GSK3B,PTPRS,EZR,NTRK2,OPRD1,CDK6	21/-
14_Member	GO Biological Processes	GO:0003013	circulatory system process	-10.1934	-7.74185	135,367,1813,1956,2534,4313,4363,5243,5742,5743,6714,6916,9429,50507	ADORA2A,AR,DRD2,EGFR,FYN,MMP2,ABCC1,ABCB1,PTGS1,PTGS2,SRC,TBXAS1,ABCG2,NOX4	14/508
14_Member	GO Biological Processes	GO:0003018	vascular process in circulatory system	-7.31314	-5.29267	135,1956,4313,4363,5243,5743,6714,6916,9429	ADORA2A,EGFR,MMP2,ABCC1,ABCB1,PTGS2,SRC,TBXAS1,ABCG2	9/275
14_Member	GO Biological Processes	GO:0008015	blood circulation	-5.78828	-4.0156	135,367,1813,1956,4313,5742,5743,6714,6916	ADORA2A,AR,DRD2,EGFR,MMP2,PTGS1,PTGS2,SRC,TBXAS1	9/418
14_Member	GO Biological Processes	GO:0090066	regulation of anatomical structure size	-5.04802	-3.38809	135,246,1956,2932,4313,5743,5802,6916,7430	ADORA2A,ALOX15,EGFR,GSK3B,MMP2,PTGS2,PTPRS,TBXAS1,EZR	9/516
14_Member	GO Biological Processes	GO:0019229	regulation of vasoconstriction	-4.46544	-2.90137	1956,4313,5743,6916	EGFR,MMP2,PTGS2,TBXAS1	4/69
14_Member	GO Biological Processes	GO:0035296	regulation of tube diameter	-4.27636	-2.74856	135,1956,4313,5743,6916	ADORA2A,EGFR,MMP2,PTGS2,TBXAS1	5/152
14_Member	GO Biological Processes	GO:0097746	blood vessel diameter maintenance	-4.27636	-2.74856	135,1956,4313,5743,6916	ADORA2A,EGFR,MMP2,PTGS2,TBXAS1	5/152
14_Member	GO Biological Processes	GO:0035150	regulation of tube size	-4.26283	-2.73927	135,1956,4313,5743,6916	ADORA2A,EGFR,MMP2,PTGS2,TBXAS1	5/153
14_Member	GO Biological Processes	GO:0051966	regulation of synaptic transmission, glutamatergic	-4.21268	-2.69298	135,1813,1956,5743	ADORA2A,DRD2,EGFR,PTGS2	4/80
14_Member	GO Biological Processes	GO:0045907	positive regulation of vasoconstriction	-4.03883	-2.54698	1956,5743,6916	EGFR,PTGS2,TBXAS1	3/33
14_Member	GO Biological Processes	GO:0033138	positive regulation of peptidyl-serine phosphorylation	-3.95772	-2.48349	1956,4915,4985,5743	EGFR,NTRK2,OPRD1,PTGS2	4/93
14_Member	GO Biological Processes	GO:0051968	positive regulation of synaptic transmission, glutamatergic	-3.92449	-2.45625	135,1956,5743	ADORA2A,EGFR,PTGS2	3/36
14_Member	GO Biological Processes	GO:0014002	astrocyte development	-3.88859	-2.42879	135,1021,1956	ADORA2A,CDK6,EGFR	3/37
14_Member	GO Biological Processes	GO:0033135	regulation of peptidyl-serine phosphorylation	-3.4513	-2.06928	1956,4915,4985,5743	EGFR,NTRK2,OPRD1,PTGS2	4/126
15_Summary	GO Biological Processes	GO:0097305	response to alcohol	-10.0634	-7.62799	142,196,983,1019,1080,1545,1813,2534,4129,6480,6916	PARP1,AHR,CDK1,CDK4,CFTR,CYP1B1,DRD2,FYN,MAOB,ST6GAL1,TBXAS1	11/-
15_Member	GO Biological Processes	GO:0097305	response to alcohol	-10.0634	-7.62799	142,196,983,1019,1080,1545,1813,2534,4129,6480,6916	PARP1,AHR,CDK1,CDK4,CFTR,CYP1B1,DRD2,FYN,MAOB,ST6GAL1,TBXAS1	11/258
15_Member	GO Biological Processes	GO:0045471	response to ethanol	-6.05099	-4.21365	983,1813,2534,4129,6480,6916	CDK1,DRD2,FYN,MAOB,ST6GAL1,TBXAS1	6/122
16_Summary	GO Biological Processes	GO:1901654	response to ketone	-9.55066	-7.18777	142,196,367,768,1019,1080,1545,1956,4129,6714,135,1111,5743,7430	PARP1,AHR,AR,CA9,CDK4,CFTR,CYP1B1,EGFR,MAOB,SRC,ADORA2A,CHEK1,PTGS2,EZR	14/-
16_Member	GO Biological Processes	GO:1901654	response to ketone	-9.55066	-7.18777	142,196,367,768,1019,1080,1545,1956,4129,6714	PARP1,AHR,AR,CA9,CDK4,CFTR,CYP1B1,EGFR,MAOB,SRC	10/215
16_Member	GO Biological Processes	GO:1901655	cellular response to ketone	-7.89666	-5.7964	196,367,1019,1080,1545,1956,6714	AHR,AR,CDK4,CFTR,CYP1B1,EGFR,SRC	7/105
16_Member	GO Biological Processes	GO:0014074	response to purine-containing compound	-6.96852	-4.98024	135,196,1080,1111,1545,5743,7430	ADORA2A,AHR,CFTR,CHEK1,CYP1B1,PTGS2,EZR	7/143
16_Member	GO Biological Processes	GO:0071320	cellular response to cAMP	-5.02338	-3.36872	196,1080,1545,7430	AHR,CFTR,CYP1B1,EZR	4/50
16_Member	GO Biological Processes	GO:0046683	response to organophosphorus	-4.63357	-3.03983	196,1080,1545,5743,7430	AHR,CFTR,CYP1B1,PTGS2,EZR	5/128
16_Member	GO Biological Processes	GO:0051591	response to cAMP	-4.10974	-2.60696	196,1080,1545,7430	AHR,CFTR,CYP1B1,EZR	4/85
16_Member	GO Biological Processes	GO:0097306	cellular response to alcohol	-3.75403	-2.31622	196,1019,1080,1545	AHR,CDK4,CFTR,CYP1B1	4/105
17_Summary	GO Biological Processes	GO:1903829	positive regulation of protein localization	-9.35784	-7.01454	43,135,142,983,1080,1956,2534,2932,5295,5743,6714,7015,7430,240,1813,5770	ACHE,ADORA2A,PARP1,CDK1,CFTR,EGFR,FYN,GSK3B,PIK3R1,PTGS2,SRC,TERT,EZR,ALOX5,DRD2,PTPN1	16/-
17_Member	GO Biological Processes	GO:1903829	positive regulation of protein localization	-9.35784	-7.01454	43,135,142,983,1080,1956,2534,2932,5295,5743,6714,7015,7430	ACHE,ADORA2A,PARP1,CDK1,CFTR,EGFR,FYN,GSK3B,PIK3R1,PTGS2,SRC,TERT,EZR	13/483
17_Member	GO Biological Processes	GO:0070201	regulation of establishment of protein localization	-8.80103	-6.54431	43,135,240,983,1080,1813,1956,2534,2932,5295,5743,5770,6714	ACHE,ADORA2A,ALOX5,CDK1,CFTR,DRD2,EGFR,FYN,GSK3B,PIK3R1,PTGS2,PTPN1,SRC	13/537
17_Member	GO Biological Processes	GO:0051223	regulation of protein transport	-8.72557	-6.47919	43,135,240,983,1080,1813,1956,2932,5295,5743,5770,6714	ACHE,ADORA2A,ALOX5,CDK1,CFTR,DRD2,EGFR,GSK3B,PIK3R1,PTGS2,PTPN1,SRC	12/440
17_Member	GO Biological Processes	GO:1900180	regulation of protein localization to nucleus	-8.33138	-6.14235	142,983,2534,2932,5295,5743,6714,7015	PARP1,CDK1,FYN,GSK3B,PIK3R1,PTGS2,SRC,TERT	8/144
17_Member	GO Biological Processes	GO:1900182	positive regulation of protein localization to nucleus	-8.23363	-6.07067	142,983,2534,5295,5743,6714,7015	PARP1,CDK1,FYN,PIK3R1,PTGS2,SRC,TERT	7/94
17_Member	GO Biological Processes	GO:1904951	positive regulation of establishment of protein localization	-7.81288	-5.72344	43,135,983,1080,1956,2534,2932,5295,5743,6714	ACHE,ADORA2A,CDK1,CFTR,EGFR,FYN,GSK3B,PIK3R1,PTGS2,SRC	10/326
17_Member	GO Biological Processes	GO:0051222	positive regulation of protein transport	-7.65356	-5.5917	43,135,983,1080,1956,2932,5295,5743,6714	ACHE,ADORA2A,CDK1,CFTR,EGFR,GSK3B,PIK3R1,PTGS2,SRC	9/251
17_Member	GO Biological Processes	GO:0046824	positive regulation of nucleocytoplasmic transport	-4.64961	-3.04668	983,2932,5295,5743	CDK1,GSK3B,PIK3R1,PTGS2	4/62
17_Member	GO Biological Processes	GO:0032388	positive regulation of intracellular transport	-4.44673	-2.88819	983,2932,5295,5743,7430	CDK1,GSK3B,PIK3R1,PTGS2,EZR	5/140
17_Member	GO Biological Processes	GO:0033157	regulation of intracellular protein transport	-4.31756	-2.77825	983,2932,5295,5743,5770	CDK1,GSK3B,PIK3R1,PTGS2,PTPN1	5/149
17_Member	GO Biological Processes	GO:0090316	positive regulation of intracellular protein transport	-3.92189	-2.45621	983,2932,5295,5743	CDK1,GSK3B,PIK3R1,PTGS2	4/95
17_Member	GO Biological Processes	GO:0042307	positive regulation of protein import into nucleus	-3.78673	-2.3444	983,5295,5743	CDK1,PIK3R1,PTGS2	3/40
17_Member	GO Biological Processes	GO:0046822	regulation of nucleocytoplasmic transport	-3.64641	-2.23027	983,2932,5295,5743	CDK1,GSK3B,PIK3R1,PTGS2	4/112
17_Member	GO Biological Processes	GO:0042306	regulation of protein import into nucleus	-3.307	-1.94942	983,5295,5743	CDK1,PIK3R1,PTGS2	3/58
18_Summary	GO Biological Processes	GO:0007162	negative regulation of cell adhesion	-9.21776	-6.89322	135,239,383,1545,4313,4321,5295,5320,5340,6714,8654,240,2534,3932,6850,196,5321,5591,6480	ADORA2A,ALOX12,ARG1,CYP1B1,MMP2,MMP12,PIK3R1,PLA2G2A,PLG,SRC,PDE5A,ALOX5,FYN,LCK,SYK,AHR,PLA2G4A,PRKDC,ST6GAL1	19/-
18_Member	GO Biological Processes	GO:0007162	negative regulation of cell adhesion	-9.21776	-6.89322	135,239,383,1545,4313,4321,5295,5320,5340,6714,8654	ADORA2A,ALOX12,ARG1,CYP1B1,MMP2,MMP12,PIK3R1,PLA2G2A,PLG,SRC,PDE5A	11/310
18_Member	GO Biological Processes	GO:0022407	regulation of cell-cell adhesion	-7.11293	-5.11031	135,239,240,383,2534,3932,5320,5340,6714,6850,8654	ADORA2A,ALOX12,ALOX5,ARG1,FYN,LCK,PLA2G2A,PLG,SRC,SYK,PDE5A	11/496
18_Member	GO Biological Processes	GO:0050865	regulation of cell activation	-7.00779	-5.01383	135,196,239,383,2534,3932,5320,5321,5591,6714,6850,8654	ADORA2A,AHR,ALOX12,ARG1,FYN,LCK,PLA2G2A,PLA2G4A,PRKDC,SRC,SYK,PDE5A	12/630
18_Member	GO Biological Processes	GO:0002694	regulation of leukocyte activation	-6.48743	-4.56449	135,196,383,2534,3932,5320,5321,5591,6714,6850,8654	ADORA2A,AHR,ARG1,FYN,LCK,PLA2G2A,PLA2G4A,PRKDC,SRC,SYK,PDE5A	11/573
18_Member	GO Biological Processes	GO:1903037	regulation of leukocyte cell-cell adhesion	-6.11075	-4.2551	135,240,383,2534,3932,5320,6714,6850,8654	ADORA2A,ALOX5,ARG1,FYN,LCK,PLA2G2A,SRC,SYK,PDE5A	9/382
18_Member	GO Biological Processes	GO:0051249	regulation of lymphocyte activation	-6.04712	-4.21176	135,196,383,2534,3932,5320,5591,6714,6850,8654	ADORA2A,AHR,ARG1,FYN,LCK,PLA2G2A,PRKDC,SRC,SYK,PDE5A	10/506
18_Member	GO Biological Processes	GO:0050863	regulation of T cell activation	-5.10666	-3.43055	135,383,2534,3932,5320,6714,6850,8654	ADORA2A,ARG1,FYN,LCK,PLA2G2A,SRC,SYK,PDE5A	8/382
18_Member	GO Biological Processes	GO:0022408	negative regulation of cell-cell adhesion	-4.77592	-3.154	135,239,383,5320,5340,8654	ADORA2A,ALOX12,ARG1,PLA2G2A,PLG,PDE5A	6/203
18_Member	GO Biological Processes	GO:0032944	regulation of mononuclear cell proliferation	-4.35812	-2.81275	196,383,5320,6480,6850,8654	AHR,ARG1,PLA2G2A,ST6GAL1,SYK,PDE5A	6/241
18_Member	GO Biological Processes	GO:0050866	negative regulation of cell activation	-3.57107	-2.17196	135,239,383,5320,8654	ADORA2A,ALOX12,ARG1,PLA2G2A,PDE5A	5/215
18_Member	GO Biological Processes	GO:0050868	negative regulation of T cell activation	-3.41253	-2.0395	135,383,5320,8654	ADORA2A,ARG1,PLA2G2A,PDE5A	4/129
18_Member	GO Biological Processes	GO:0050670	regulation of lymphocyte proliferation	-3.37721	-2.00962	196,383,5320,6850,8654	AHR,ARG1,PLA2G2A,SYK,PDE5A	5/237
18_Member	GO Biological Processes	GO:1903038	negative regulation of leukocyte cell-cell adhesion	-3.18765	-1.85133	135,383,5320,8654	ADORA2A,ARG1,PLA2G2A,PDE5A	4/148
18_Member	GO Biological Processes	GO:0042130	negative regulation of T cell proliferation	-3.01493	-1.70067	383,5320,8654	ARG1,PLA2G2A,PDE5A	3/73
18_Member	GO Biological Processes	GO:0051250	negative regulation of lymphocyte activation	-3.01163	-1.69855	135,383,5320,8654	ADORA2A,ARG1,PLA2G2A,PDE5A	4/165
18_Member	GO Biological Processes	GO:0042129	regulation of T cell proliferation	-2.86326	-1.56136	383,5320,6850,8654	ARG1,PLA2G2A,SYK,PDE5A	4/181
18_Member	GO Biological Processes	GO:0002695	negative regulation of leukocyte activation	-2.76943	-1.47842	135,383,5320,8654	ADORA2A,ARG1,PLA2G2A,PDE5A	4/192
18_Member	GO Biological Processes	GO:0050672	negative regulation of lymphocyte proliferation	-2.76661	-1.47674	383,5320,8654	ARG1,PLA2G2A,PDE5A	3/89
18_Member	GO Biological Processes	GO:0032945	negative regulation of mononuclear cell proliferation	-2.75271	-1.46565	383,5320,8654	ARG1,PLA2G2A,PDE5A	3/90
18_Member	GO Biological Processes	GO:0070664	negative regulation of leukocyte proliferation	-2.64713	-1.37387	383,5320,8654	ARG1,PLA2G2A,PDE5A	3/98
19_Summary	GO Biological Processes	GO:0071345	cellular response to cytokine stimulus	-9.07453	-6.76206	246,1019,1545,1612,2322,2859,2932,3551,3815,4313,5295,5594,5595,6714,6850	ALOX15,CDK4,CYP1B1,DAPK1,FLT3,GPR35,GSK3B,IKBKB,KIT,MMP2,PIK3R1,MAPK1,MAPK3,SRC,SYK	15/-
19_Member	GO Biological Processes	GO:0071345	cellular response to cytokine stimulus	-9.07453	-6.76206	246,1019,1545,1612,2322,2859,2932,3551,3815,4313,5295,5594,5595,6714,6850	ALOX15,CDK4,CYP1B1,DAPK1,FLT3,GPR35,GSK3B,IKBKB,KIT,MMP2,PIK3R1,MAPK1,MAPK3,SRC,SYK	15/738
19_Member	GO Biological Processes	GO:0019221	cytokine-mediated signaling pathway	-5.07381	-3.40486	2322,2859,3551,3815,5295,5595,6714,6850	FLT3,GPR35,IKBKB,KIT,PIK3R1,MAPK3,SRC,SYK	8/386
19_Member	GO Biological Processes	GO:0070555	response to interleukin-1	-3.41253	-2.0395	3551,4313,5595,6714	IKBKB,MMP2,MAPK3,SRC	4/129
19_Member	GO Biological Processes	GO:0071347	cellular response to interleukin-1	-2.6099	-1.34043	3551,4313,5595	IKBKB,MMP2,MAPK3	3/101
20_Summary	GO Biological Processes	GO:2000641	regulation of early endosome to late endosome transport	-8.893	-6.62157	5594,5595,5604,6714,7430,1956,367,5295,135,1021,4915,1111,1545,50507,1544,3791,4321,1813,983,3551,142,5340,5743,4313,1588,1017,5591,3815,6480,240	MAPK1,MAPK3,MAP2K1,SRC,EZR,EGFR,AR,PIK3R1,ADORA2A,CDK6,NTRK2,CHEK1,CYP1B1,NOX4,CYP1A2,KDR,MMP12,DRD2,CDK1,IKBKB,PARP1,PLG,PTGS2,MMP2,CYP19A1,CDK2,PRKDC,KIT,ST6GAL1,ALOX5	30/-
20_Member	GO Biological Processes	GO:2000641	regulation of early endosome to late endosome transport	-8.893	-6.62157	5594,5595,5604,6714,7430	MAPK1,MAPK3,MAP2K1,SRC,EZR	5/19
20_Member	GO Biological Processes	GO:0038128	ERBB2 signaling pathway	-8.43513	-6.23705	1956,5594,5595,5604,6714	EGFR,MAPK1,MAPK3,MAP2K1,SRC	5/23
20_Member	GO Biological Processes	GO:0048009	insulin-like growth factor receptor signaling pathway	-7.66616	-5.60095	367,5295,5594,5595,5604	AR,PIK3R1,MAPK1,MAPK3,MAP2K1	5/32
20_Member	GO Biological Processes	GO:0048708	astrocyte differentiation	-7.64831	-5.58978	135,1021,1956,5594,5595,5604	ADORA2A,CDK6,EGFR,MAPK1,MAPK3,MAP2K1	6/66
20_Member	GO Biological Processes	GO:0021782	glial cell development	-7.34659	-5.32001	135,1021,1956,4915,5594,5595,5604	ADORA2A,CDK6,EGFR,NTRK2,MAPK1,MAPK3,MAP2K1	7/126
20_Member	GO Biological Processes	GO:0090170	regulation of Golgi inheritance	-7.14964	-5.1441	5594,5595,5604	MAPK1,MAPK3,MAP2K1	3/4
20_Member	GO Biological Processes	GO:0060440	trachea formation	-6.21012	-4.33098	5594,5595,5604	MAPK1,MAPK3,MAP2K1	3/7
20_Member	GO Biological Processes	GO:2000278	regulation of DNA biosynthetic process	-6.20196	-4.32501	1111,1545,5594,5595,6714,50507	CHEK1,CYP1B1,MAPK1,MAPK3,SRC,NOX4	6/115
20_Member	GO Biological Processes	GO:0030324	lung development	-6.17788	-4.30743	1544,1956,3791,4321,5594,5595,5604	CYP1A2,EGFR,KDR,MMP12,MAPK1,MAPK3,MAP2K1	7/187
20_Member	GO Biological Processes	GO:0030323	respiratory tube development	-6.11615	-4.25841	1544,1956,3791,4321,5594,5595,5604	CYP1A2,EGFR,KDR,MMP12,MAPK1,MAPK3,MAP2K1	7/191
20_Member	GO Biological Processes	GO:0038127	ERBB signaling pathway	-6.08276	-4.23738	1956,5594,5595,5604,6714	EGFR,MAPK1,MAPK3,MAP2K1,SRC	5/65
20_Member	GO Biological Processes	GO:0035270	endocrine system development	-5.90899	-4.10426	1021,1545,1813,5594,5595,5604	CDK6,CYP1B1,DRD2,MAPK1,MAPK3,MAP2K1	6/129
20_Member	GO Biological Processes	GO:0000165	MAPK cascade	-5.85465	-4.06086	367,983,1956,3551,5594,5595,5604	AR,CDK1,EGFR,IKBKB,MAPK1,MAPK3,MAP2K1	7/209
20_Member	GO Biological Processes	GO:0038129	ERBB3 signaling pathway	-5.83156	-4.04846	5594,5595,5604	MAPK1,MAPK3,MAP2K1	3/9
20_Member	GO Biological Processes	GO:0038133	ERBB2-ERBB3 signaling pathway	-5.83156	-4.04846	5594,5595,5604	MAPK1,MAPK3,MAP2K1	3/9
20_Member	GO Biological Processes	GO:0060541	respiratory system development	-5.78632	-4.01535	1544,1956,3791,4321,5594,5595,5604	CYP1A2,EGFR,KDR,MMP12,MAPK1,MAPK3,MAP2K1	7/214
20_Member	GO Biological Processes	GO:0010001	glial cell differentiation	-5.75947	-3.9902	135,1021,1956,4915,5594,5595,5604	ADORA2A,CDK6,EGFR,NTRK2,MAPK1,MAPK3,MAP2K1	7/216
20_Member	GO Biological Processes	GO:0001890	placenta development	-5.54462	-3.80826	142,1956,5340,5594,5604,5743	PARP1,EGFR,PLG,MAPK1,MAP2K1,PTGS2	6/149
20_Member	GO Biological Processes	GO:0060020	Bergmann glial cell differentiation	-5.54002	-3.80826	5594,5595,5604	MAPK1,MAPK3,MAP2K1	3/11
20_Member	GO Biological Processes	GO:0060439	trachea morphogenesis	-5.54002	-3.80826	5594,5595,5604	MAPK1,MAPK3,MAP2K1	3/11
20_Member	GO Biological Processes	GO:0048645	animal organ formation	-5.46096	-3.73694	367,5594,5595,5604	AR,MAPK1,MAPK3,MAP2K1	4/39
20_Member	GO Biological Processes	GO:0014044	Schwann cell development	-5.32977	-3.62231	4915,5594,5595,5604	NTRK2,MAPK1,MAPK3,MAP2K1	4/42
20_Member	GO Biological Processes	GO:0014037	Schwann cell differentiation	-5.13176	-3.4515	4915,5594,5595,5604	NTRK2,MAPK1,MAPK3,MAP2K1	4/47
20_Member	GO Biological Processes	GO:0042063	gliogenesis	-5.10109	-3.42772	135,1021,1956,4915,5594,5595,5604	ADORA2A,CDK6,EGFR,NTRK2,MAPK1,MAPK3,MAP2K1	7/272
20_Member	GO Biological Processes	GO:0070371	ERK1 and ERK2 cascade	-5.09484	-3.42283	983,5594,5595,5604	CDK1,MAPK1,MAPK3,MAP2K1	4/48
20_Member	GO Biological Processes	GO:1903358	regulation of Golgi organization	-5.01345	-3.3614	5594,5595,5604	MAPK1,MAPK3,MAP2K1	3/16
20_Member	GO Biological Processes	GO:0060324	face development	-4.95489	-3.30929	4313,5594,5595,5604	MMP2,MAPK1,MAPK3,MAP2K1	4/52
20_Member	GO Biological Processes	GO:0051403	stress-activated MAPK cascade	-4.7778	-3.15467	3551,5594,5595	IKBKB,MAPK1,MAPK3	3/19
20_Member	GO Biological Processes	GO:0060438	trachea development	-4.7778	-3.15467	5594,5595,5604	MAPK1,MAPK3,MAP2K1	3/19
20_Member	GO Biological Processes	GO:1904356	regulation of telomere maintenance via telomere lengthening	-4.62199	-3.03052	142,5594,5595,6714	PARP1,MAPK1,MAPK3,SRC	4/63
20_Member	GO Biological Processes	GO:2000573	positive regulation of DNA biosynthetic process	-4.44076	-2.88509	1545,5594,5595,50507	CYP1B1,MAPK1,MAPK3,NOX4	4/70
20_Member	GO Biological Processes	GO:0031098	stress-activated protein kinase signaling cascade	-4.35494	-2.81261	3551,5594,5595	IKBKB,MAPK1,MAPK3	3/26
20_Member	GO Biological Processes	GO:0010758	regulation of macrophage chemotaxis	-4.30462	-2.7683	1588,5594,5595	CYP19A1,MAPK1,MAPK3	3/27
20_Member	GO Biological Processes	GO:0033044	regulation of chromosome organization	-4.29882	-2.76449	142,983,1017,5594,5595,6714	PARP1,CDK1,CDK2,MAPK1,MAPK3,SRC	6/247
20_Member	GO Biological Processes	GO:0030878	thyroid gland development	-4.1647	-2.65541	5594,5595,5604	MAPK1,MAPK3,MAP2K1	3/30
20_Member	GO Biological Processes	GO:0060674	placenta blood vessel development	-4.12132	-2.61577	5340,5594,5604	PLG,MAPK1,MAP2K1	3/31
20_Member	GO Biological Processes	GO:0001892	embryonic placenta development	-4.07035	-2.57488	1956,5340,5594,5604	EGFR,PLG,MAPK1,MAP2K1	4/87
20_Member	GO Biological Processes	GO:0007422	peripheral nervous system development	-4.05102	-2.55736	4915,5594,5595,5604	NTRK2,MAPK1,MAPK3,MAP2K1	4/88
20_Member	GO Biological Processes	GO:0032872	regulation of stress-activated MAPK cascade	-3.96145	-2.48548	5594,5595,5604	MAPK1,MAPK3,MAP2K1	3/35
20_Member	GO Biological Processes	GO:0007507	heart development	-3.87834	-2.42187	983,3791,4313,5591,5594,5595,5604,50507	CDK1,KDR,MMP2,PRKDC,MAPK1,MAPK3,MAP2K1,NOX4	8/570
20_Member	GO Biological Processes	GO:0070302	regulation of stress-activated protein kinase signaling cascade	-3.8537	-2.39971	5594,5595,5604	MAPK1,MAPK3,MAP2K1	3/38
20_Member	GO Biological Processes	GO:0032204	regulation of telomere maintenance	-3.73819	-2.30197	142,5594,5595,6714	PARP1,MAPK1,MAPK3,SRC	4/106
20_Member	GO Biological Processes	GO:0048568	embryonic organ development	-3.70824	-2.27705	1956,3791,3815,5340,5594,5595,5604	EGFR,KDR,KIT,PLG,MAPK1,MAPK3,MAP2K1	7/452
20_Member	GO Biological Processes	GO:2001252	positive regulation of chromosome organization	-3.6764	-2.25419	983,1017,5594,5595	CDK1,CDK2,MAPK1,MAPK3	4/110
20_Member	GO Biological Processes	GO:0051972	regulation of telomerase activity	-3.66277	-2.24369	5594,5595,6714	MAPK1,MAPK3,SRC	3/44
20_Member	GO Biological Processes	GO:1905521	regulation of macrophage migration	-3.66277	-2.24369	1588,5594,5595	CYP19A1,MAPK1,MAPK3	3/44
20_Member	GO Biological Processes	GO:0034612	response to tumor necrosis factor	-3.61819	-2.20582	1545,3551,5594,5595,5743	CYP1B1,IKBKB,MAPK1,MAPK3,PTGS2	5/210
20_Member	GO Biological Processes	GO:0070849	response to epidermal growth factor	-3.60517	-2.19801	1956,5594,5595	EGFR,MAPK1,MAPK3	3/46
20_Member	GO Biological Processes	GO:0060711	labyrinthine layer development	-3.57735	-2.17533	5340,5594,5604	PLG,MAPK1,MAP2K1	3/47
20_Member	GO Biological Processes	GO:0048538	thymus development	-3.52353	-2.13092	5594,5595,5604	MAPK1,MAPK3,MAP2K1	3/49
20_Member	GO Biological Processes	GO:0060425	lung morphogenesis	-3.52353	-2.13092	5594,5595,5604	MAPK1,MAPK3,MAP2K1	3/49
20_Member	GO Biological Processes	GO:0035051	cardiocyte differentiation	-3.46444	-2.07963	983,5594,5595,50507	CDK1,MAPK1,MAPK3,NOX4	4/125
20_Member	GO Biological Processes	GO:0050920	regulation of chemotaxis	-3.4453	-2.06538	1588,3791,5594,5595,6480	CYP19A1,KDR,MAPK1,MAPK3,ST6GAL1	5/229
20_Member	GO Biological Processes	GO:0042552	myelination	-3.43826	-2.05973	4915,5594,5595,5604	NTRK2,MAPK1,MAPK3,MAP2K1	4/127
20_Member	GO Biological Processes	GO:0007272	ensheathment of neurons	-3.41253	-2.0395	4915,5594,5595,5604	NTRK2,MAPK1,MAPK3,MAP2K1	4/129
20_Member	GO Biological Processes	GO:0008366	axon ensheathment	-3.41253	-2.0395	4915,5594,5595,5604	NTRK2,MAPK1,MAPK3,MAP2K1	4/129
20_Member	GO Biological Processes	GO:0032210	regulation of telomere maintenance via telomerase	-3.37499	-2.00848	5594,5595,6714	MAPK1,MAPK3,SRC	3/55
20_Member	GO Biological Processes	GO:0001701	in utero embryonic development	-3.19941	-1.86111	367,1111,1956,5340,5594,5604	AR,CHEK1,EGFR,PLG,MAPK1,MAP2K1	6/395
20_Member	GO Biological Processes	GO:0002520	immune system development	-3.01163	-1.69855	5591,5594,5595,5604	PRKDC,MAPK1,MAPK3,MAP2K1	4/165
20_Member	GO Biological Processes	GO:0071356	cellular response to tumor necrosis factor	-2.83705	-1.53862	1545,3551,5594,5595	CYP1B1,IKBKB,MAPK1,MAPK3	4/184
20_Member	GO Biological Processes	GO:0043009	chordate embryonic development	-2.77832	-1.48618	367,1111,1956,5340,5591,5594,5604	AR,CHEK1,EGFR,PLG,PRKDC,MAPK1,MAP2K1	7/650
20_Member	GO Biological Processes	GO:0009792	embryo development ending in birth or egg hatching	-2.70035	-1.41942	367,1111,1956,5340,5591,5594,5604	AR,CHEK1,EGFR,PLG,PRKDC,MAPK1,MAP2K1	7/671
20_Member	GO Biological Processes	GO:0048534	hematopoietic or lymphoid organ development	-2.64713	-1.37387	5594,5595,5604	MAPK1,MAPK3,MAP2K1	3/98
20_Member	GO Biological Processes	GO:0002685	regulation of leukocyte migration	-2.4862	-1.22527	1588,5295,5594,5595	CYP19A1,PIK3R1,MAPK1,MAPK3	4/230
20_Member	GO Biological Processes	GO:0030278	regulation of ossification	-2.37874	-1.12774	240,5594,5595	ALOX5,MAPK1,MAPK3	3/122
20_Member	GO Biological Processes	GO:0002688	regulation of leukocyte chemotaxis	-2.36884	-1.11835	1588,5594,5595	CYP19A1,MAPK1,MAPK3	3/123
20_Member	GO Biological Processes	GO:0090596	sensory organ morphogenesis	-2.21258	-0.974798	3791,4915,5594,5595	KDR,NTRK2,MAPK1,MAPK3	4/275
20_Member	GO Biological Processes	GO:0050921	positive regulation of chemotaxis	-2.19579	-0.961498	3791,5594,5595	KDR,MAPK1,MAPK3	3/142
20_Member	GO Biological Processes	GO:0002687	positive regulation of leukocyte migration	-2.13837	-0.908041	5295,5594,5595	PIK3R1,MAPK1,MAPK3	3/149

## Sheet: Table5. MF
GroupID	Category	Term	Description	LogP	Log(q-value)	Genes	Symbols	InTerm_InList
1_Summary	GO Molecular Functions	GO:0016773	phosphotransferase activity, alcohol group as acceptor	-24.1878	-20.489	238,983,1017,1019,1021,1111,1457,1612,1956,2322,2534,2870,2932,3551,3791,3815,3932,4915,5209,5295,5591,5594,5595,5604,6714,6850,7465	ALK,CDK1,CDK2,CDK4,CDK6,CHEK1,CSNK2A1,DAPK1,EGFR,FLT3,FYN,GRK6,GSK3B,IKBKB,KDR,KIT,LCK,NTRK2,PFKFB3,PIK3R1,PRKDC,MAPK1,MAPK3,MAP2K1,SRC,SYK,WEE1	27/-
1_Member	GO Molecular Functions	GO:0016773	phosphotransferase activity, alcohol group as acceptor	-24.1878	-20.489	238,983,1017,1019,1021,1111,1457,1612,1956,2322,2534,2870,2932,3551,3791,3815,3932,4915,5209,5295,5591,5594,5595,5604,6714,6850,7465	ALK,CDK1,CDK2,CDK4,CDK6,CHEK1,CSNK2A1,DAPK1,EGFR,FLT3,FYN,GRK6,GSK3B,IKBKB,KDR,KIT,LCK,NTRK2,PFKFB3,PIK3R1,PRKDC,MAPK1,MAPK3,MAP2K1,SRC,SYK,WEE1	27/671
1_Member	GO Molecular Functions	GO:0004672	protein kinase activity	-23.3504	-20.0816	238,983,1017,1019,1021,1111,1457,1612,1956,2322,2534,2870,2932,3551,3791,3815,3932,4915,5591,5594,5595,5604,6714,6850,7465	ALK,CDK1,CDK2,CDK4,CDK6,CHEK1,CSNK2A1,DAPK1,EGFR,FLT3,FYN,GRK6,GSK3B,IKBKB,KDR,KIT,LCK,NTRK2,PRKDC,MAPK1,MAPK3,MAP2K1,SRC,SYK,WEE1	25/563
1_Member	GO Molecular Functions	GO:0016301	kinase activity	-23.3032	-20.0816	238,983,1017,1019,1021,1111,1457,1612,1956,2322,2534,2870,2932,3551,3791,3815,3932,4915,5209,5295,5591,5594,5595,5604,6714,6850,7465	ALK,CDK1,CDK2,CDK4,CDK6,CHEK1,CSNK2A1,DAPK1,EGFR,FLT3,FYN,GRK6,GSK3B,IKBKB,KDR,KIT,LCK,NTRK2,PFKFB3,PIK3R1,PRKDC,MAPK1,MAPK3,MAP2K1,SRC,SYK,WEE1	27/725
1_Member	GO Molecular Functions	GO:0004674	protein serine/threonine kinase activity	-13.6615	-10.6617	983,1017,1019,1021,1111,1457,1612,1956,2870,2932,3551,5591,5594,5595,5604,6850	CDK1,CDK2,CDK4,CDK6,CHEK1,CSNK2A1,DAPK1,EGFR,GRK6,GSK3B,IKBKB,PRKDC,MAPK1,MAPK3,MAP2K1,SYK	16/427
1_Member	GO Molecular Functions	GO:0106310	protein serine kinase activity	-10.8859	-7.96539	983,1017,1019,1021,1111,1457,1612,2932,3551,5591,5594,5595,5604	CDK1,CDK2,CDK4,CDK6,CHEK1,CSNK2A1,DAPK1,GSK3B,IKBKB,PRKDC,MAPK1,MAPK3,MAP2K1	13/363
2_Summary	GO Molecular Functions	GO:0004713	protein tyrosine kinase activity	-14.6429	-11.5463	238,1956,2322,2534,3791,3815,3932,4915,5604,6714,6850,7465,1019,5295	ALK,EGFR,FLT3,FYN,KDR,KIT,LCK,NTRK2,MAP2K1,SRC,SYK,WEE1,CDK4,PIK3R1	14/-
2_Member	GO Molecular Functions	GO:0004713	protein tyrosine kinase activity	-14.6429	-11.5463	238,1956,2322,2534,3791,3815,3932,4915,5604,6714,6850,7465	ALK,EGFR,FLT3,FYN,KDR,KIT,LCK,NTRK2,MAP2K1,SRC,SYK,WEE1	12/138
2_Member	GO Molecular Functions	GO:0004714	transmembrane receptor protein tyrosine kinase activity	-7.90169	-5.31693	238,1956,2322,3791,3815,4915	ALK,EGFR,FLT3,KDR,KIT,NTRK2	6/60
2_Member	GO Molecular Functions	GO:0019199	transmembrane receptor protein kinase activity	-7.17452	-4.73108	238,1956,2322,3791,3815,4915	ALK,EGFR,FLT3,KDR,KIT,NTRK2	6/79
2_Member	GO Molecular Functions	GO:0019838	growth factor binding	-4.5224	-2.59503	1956,2322,3791,3815,4915	EGFR,FLT3,KDR,KIT,NTRK2	5/135
2_Member	GO Molecular Functions	GO:0019207	kinase regulator activity	-4.08539	-2.21919	238,1019,1956,2322,5295,5604	ALK,CDK4,EGFR,FLT3,PIK3R1,MAP2K1	6/270
2_Member	GO Molecular Functions	GO:0019209	kinase activator activity	-3.31373	-1.5393	238,1956,5295,5604	ALK,EGFR,PIK3R1,MAP2K1	4/137
2_Member	GO Molecular Functions	GO:0008047	enzyme activator activity	-3.00249	-1.26756	238,1956,2534,3932,5295,5604,6714	ALK,EGFR,FYN,LCK,PIK3R1,MAP2K1,SRC	7/594
2_Member	GO Molecular Functions	GO:0019887	protein kinase regulator activity	-2.47278	-0.769708	238,1019,1956,5604	ALK,CDK4,EGFR,MAP2K1	4/232
2_Member	GO Molecular Functions	GO:0030295	protein kinase activator activity	-2.31119	-0.631948	238,1956,5604	ALK,EGFR,MAP2K1	3/129
3_Summary	GO Molecular Functions	GO:0016491	oxidoreductase activity	-10.1842	-7.33062	231,239,240,246,873,1544,1545,1588,4128,4129,5742,5743,6916,7498,50507,57016,6714,759,760,768	AKR1B1,ALOX12,ALOX5,ALOX15,CBR1,CYP1A2,CYP1B1,CYP19A1,MAOA,MAOB,PTGS1,PTGS2,TBXAS1,XDH,NOX4,AKR1B10,SRC,CA1,CA2,CA9	20/-
3_Member	GO Molecular Functions	GO:0016491	oxidoreductase activity	-10.1842	-7.33062	231,239,240,246,873,1544,1545,1588,4128,4129,5742,5743,6916,7498,50507,57016	AKR1B1,ALOX12,ALOX5,ALOX15,CBR1,CYP1A2,CYP1B1,CYP19A1,MAOA,MAOB,PTGS1,PTGS2,TBXAS1,XDH,NOX4,AKR1B10	16/726
3_Member	GO Molecular Functions	GO:0020037	heme binding	-8.37936	-5.5901	1544,1545,1588,5742,5743,6714,6916,50507	CYP1A2,CYP1B1,CYP19A1,PTGS1,PTGS2,SRC,TBXAS1,NOX4	8/142
3_Member	GO Molecular Functions	GO:0046906	tetrapyrrole binding	-8.14628	-5.50435	1544,1545,1588,5742,5743,6714,6916,50507	CYP1A2,CYP1B1,CYP19A1,PTGS1,PTGS2,SRC,TBXAS1,NOX4	8/152
3_Member	GO Molecular Functions	GO:0005506	iron ion binding	-8.12388	-5.50435	239,240,246,1544,1545,1588,6916,7498	ALOX12,ALOX5,ALOX15,CYP1A2,CYP1B1,CYP19A1,TBXAS1,XDH	8/153
3_Member	GO Molecular Functions	GO:0016836	hydro-lyase activity	-7.85763	-5.30505	759,760,768,1544,1545,6916	CA1,CA2,CA9,CYP1A2,CYP1B1,TBXAS1	6/61
3_Member	GO Molecular Functions	GO:0016835	carbon-oxygen lyase activity	-7.20791	-4.73965	759,760,768,1544,1545,6916	CA1,CA2,CA9,CYP1A2,CYP1B1,TBXAS1	6/78
3_Member	GO Molecular Functions	GO:0106256	hydroperoxy icosatetraenoate dehydratase activity	-6.21012	-3.97381	1544,1545,6916	CYP1A2,CYP1B1,TBXAS1	3/7
3_Member	GO Molecular Functions	GO:0004089	carbonate dehydratase activity	-5.1028	-3.06891	759,760,768	CA1,CA2,CA9	3/15
3_Member	GO Molecular Functions	GO:0016705	oxidoreductase activity, acting on paired donors, with incorporation or reduction of molecular oxygen	-5.08638	-3.06891	1544,1545,1588,5742,5743,6916	CYP1A2,CYP1B1,CYP19A1,PTGS1,PTGS2,TBXAS1	6/179
3_Member	GO Molecular Functions	GO:0016829	lyase activity	-4.83719	-2.87087	759,760,768,1544,1545,6916	CA1,CA2,CA9,CYP1A2,CYP1B1,TBXAS1	6/198
3_Member	GO Molecular Functions	GO:0008395	steroid hydroxylase activity	-4.35494	-2.46241	1544,1545,1588	CYP1A2,CYP1B1,CYP19A1	3/26
3_Member	GO Molecular Functions	GO:0070330	aromatase activity	-4.35494	-2.46241	1544,1545,1588	CYP1A2,CYP1B1,CYP19A1	3/26
3_Member	GO Molecular Functions	GO:0004497	monooxygenase activity	-3.75403	-1.93038	1544,1545,1588,6916	CYP1A2,CYP1B1,CYP19A1,TBXAS1	4/105
3_Member	GO Molecular Functions	GO:0016712	oxidoreductase activity, acting on paired donors, with incorporation or reduction of molecular oxygen, reduced flavin or flavoprotein as one donor, and incorporation of one atom of oxygen	-3.69261	-1.8804	1544,1545,1588	CYP1A2,CYP1B1,CYP19A1	3/43
4_Summary	GO Molecular Functions	GO:0016702	oxidoreductase activity, acting on single donors with incorporation of molecular oxygen, incorporation of two atoms of oxygen	-8.33456	-5.5901	239,240,246,5742,5743	ALOX12,ALOX5,ALOX15,PTGS1,PTGS2	5/-
4_Member	GO Molecular Functions	GO:0016702	oxidoreductase activity, acting on single donors with incorporation of molecular oxygen, incorporation of two atoms of oxygen	-8.33456	-5.5901	239,240,246,5742,5743	ALOX12,ALOX5,ALOX15,PTGS1,PTGS2	5/24
4_Member	GO Molecular Functions	GO:0016701	oxidoreductase activity, acting on single donors with incorporation of molecular oxygen	-8.23855	-5.53984	239,240,246,5742,5743	ALOX12,ALOX5,ALOX15,PTGS1,PTGS2	5/25
4_Member	GO Molecular Functions	GO:0004052	arachidonate 12(S)-lipoxygenase activity	-7.14964	-4.72968	239,240,246	ALOX12,ALOX5,ALOX15	3/4
4_Member	GO Molecular Functions	GO:0051213	dioxygenase activity	-5.30904	-3.22312	239,240,246,5742,5743	ALOX12,ALOX5,ALOX15,PTGS1,PTGS2	5/93
5_Summary	GO Molecular Functions	GO:0019904	protein domain specific binding	-7.79027	-5.26765	367,1017,1080,1111,2534,3815,3932,4170,5340,5591,6714,6850,7430,7465,3551,5604	AR,CDK2,CFTR,CHEK1,FYN,KIT,LCK,MCL1,PLG,PRKDC,SRC,SYK,EZR,WEE1,IKBKB,MAP2K1	16/-
5_Member	GO Molecular Functions	GO:0019904	protein domain specific binding	-7.79027	-5.26765	367,1017,1080,1111,2534,3815,3932,4170,5340,5591,6714,6850,7430	AR,CDK2,CFTR,CHEK1,FYN,KIT,LCK,MCL1,PLG,PRKDC,SRC,SYK,EZR	13/653
5_Member	GO Molecular Functions	GO:0004715	non-membrane spanning protein tyrosine kinase activity	-6.89484	-4.51835	2534,3932,6714,6850,7465	FYN,LCK,SRC,SYK,WEE1	5/45
5_Member	GO Molecular Functions	GO:0043274	phospholipase binding	-6.41497	-4.14762	2534,3932,6714,6850	FYN,LCK,SRC,SYK	4/23
5_Member	GO Molecular Functions	GO:0097110	scaffold protein binding	-5.92132	-3.75409	2534,3551,5604,6714,6850	FYN,IKBKB,MAP2K1,SRC,SYK	5/70
5_Member	GO Molecular Functions	GO:0042169	SH2 domain binding	-5.32977	-3.22312	3815,3932,6714,6850	KIT,LCK,SRC,SYK	4/42
5_Member	GO Molecular Functions	GO:0016004	phospholipase activator activity	-4.92996	-2.94725	2534,3932,6714	FYN,LCK,SRC	3/17
5_Member	GO Molecular Functions	GO:0060229	lipase activator activity	-4.64193	-2.69141	2534,3932,6714	FYN,LCK,SRC	3/21
6_Summary	GO Molecular Functions	GO:0042803	protein homodimerization activity	-7.33678	-4.84219	43,142,196,1139,3551,3815,4170,4915,5743,6480,7015,7498,9429	ACHE,PARP1,AHR,CHRNA7,IKBKB,KIT,MCL1,NTRK2,PTGS2,ST6GAL1,TERT,XDH,ABCG2	13/-
6_Member	GO Molecular Functions	GO:0042803	protein homodimerization activity	-7.33678	-4.84219	43,142,196,1139,3551,3815,4170,4915,5743,6480,7015,7498,9429	ACHE,PARP1,AHR,CHRNA7,IKBKB,KIT,MCL1,NTRK2,PTGS2,ST6GAL1,TERT,XDH,ABCG2	13/714
7_Summary	GO Molecular Functions	GO:0051117	ATPase binding	-7.01401	-4.61633	367,1956,2099,3932,6714,7430,142,2932,3551,5295,5340,5770,6850,50507,3791	AR,EGFR,ESR1,LCK,SRC,EZR,PARP1,GSK3B,IKBKB,PIK3R1,PLG,PTPN1,SYK,NOX4,KDR	15/-
7_Member	GO Molecular Functions	GO:0051117	ATPase binding	-7.01401	-4.61633	367,1956,2099,3932,6714,7430	AR,EGFR,ESR1,LCK,SRC,EZR	6/84
7_Member	GO Molecular Functions	GO:0019900	kinase binding	-6.86155	-4.50526	142,1956,2099,2932,3551,3932,5295,5340,5770,6714,6850,7430,50507	PARP1,EGFR,ESR1,GSK3B,IKBKB,LCK,PIK3R1,PLG,PTPN1,SRC,SYK,EZR,NOX4	13/785
7_Member	GO Molecular Functions	GO:0019901	protein kinase binding	-6.50473	-4.20396	142,1956,2099,2932,3551,3932,5295,5770,6714,6850,7430,50507	PARP1,EGFR,ESR1,GSK3B,IKBKB,LCK,PIK3R1,PTPN1,SRC,SYK,EZR,NOX4	12/702
7_Member	GO Molecular Functions	GO:0005178	integrin binding	-3.09186	-1.3474	1956,3791,6714,6850	EGFR,KDR,SRC,SYK	4/157
7_Member	GO Molecular Functions	GO:0045296	cadherin binding	-2.71867	-0.993092	1956,3791,5770,6714,7430	EGFR,KDR,PTPN1,SRC,EZR	5/333
7_Member	GO Molecular Functions	GO:0050839	cell adhesion molecule binding	-2.44134	-0.742627	1956,3791,5770,6714,6850,7430	EGFR,KDR,PTPN1,SRC,SYK,EZR	6/558
8_Summary	GO Molecular Functions	GO:0001784	phosphotyrosine residue binding	-6.7978	-4.46082	3932,5295,5594,5595,6850,6714,1956,5770	LCK,PIK3R1,MAPK1,MAPK3,SYK,SRC,EGFR,PTPN1	8/-
8_Member	GO Molecular Functions	GO:0001784	phosphotyrosine residue binding	-6.7978	-4.46082	3932,5295,5594,5595,6850	LCK,PIK3R1,MAPK1,MAPK3,SYK	5/47
8_Member	GO Molecular Functions	GO:0051219	phosphoprotein binding	-6.74914	-4.43064	3932,5295,5594,5595,6714,6850	LCK,PIK3R1,MAPK1,MAPK3,SRC,SYK	6/93
8_Member	GO Molecular Functions	GO:0045309	protein phosphorylated amino acid binding	-6.29484	-4.04329	3932,5295,5594,5595,6850	LCK,PIK3R1,MAPK1,MAPK3,SYK	5/59
8_Member	GO Molecular Functions	GO:0019902	phosphatase binding	-6.14684	-3.92525	1956,3932,5295,5594,5595,5770,6850	EGFR,LCK,PIK3R1,MAPK1,MAPK3,PTPN1,SYK	7/189
9_Summary	GO Molecular Functions	GO:0035173	histone kinase activity	-6.41497	-4.14762	983,1017,1111,5591,1019,1021	CDK1,CDK2,CHEK1,PRKDC,CDK4,CDK6	6/-
9_Member	GO Molecular Functions	GO:0035173	histone kinase activity	-6.41497	-4.14762	983,1017,1111,5591	CDK1,CDK2,CHEK1,PRKDC	4/23
9_Member	GO Molecular Functions	GO:0004693	cyclin-dependent protein serine/threonine kinase activity	-5.9917	-3.81151	983,1017,1019,1021	CDK1,CDK2,CDK4,CDK6	4/29
9_Member	GO Molecular Functions	GO:0097472	cyclin-dependent protein kinase activity	-5.9917	-3.81151	983,1017,1019,1021	CDK1,CDK2,CDK4,CDK6	4/29
9_Member	GO Molecular Functions	GO:0030332	cyclin binding	-5.70545	-3.55081	983,1017,1019,1021	CDK1,CDK2,CDK4,CDK6	4/34
9_Member	GO Molecular Functions	GO:0140993	histone modifying activity	-2.65069	-0.934254	983,1017,1111,5591	CDK1,CDK2,CHEK1,PRKDC	4/207
10_Summary	GO Molecular Functions	GO:0017171	serine hydrolase activity	-6.05581	-3.84846	43,4313,4314,4318,4321,4322,5340	ACHE,MMP2,MMP3,MMP9,MMP12,MMP13,PLG	7/-
10_Member	GO Molecular Functions	GO:0017171	serine hydrolase activity	-6.05581	-3.84846	43,4313,4314,4318,4321,4322,5340	ACHE,MMP2,MMP3,MMP9,MMP12,MMP13,PLG	7/195
10_Member	GO Molecular Functions	GO:0004252	serine-type endopeptidase activity	-5.15673	-3.10147	4313,4314,4318,4321,4322,5340	MMP2,MMP3,MMP9,MMP12,MMP13,PLG	6/174
10_Member	GO Molecular Functions	GO:0004222	metalloendopeptidase activity	-4.95226	-2.95252	4313,4314,4318,4321,4322	MMP2,MMP3,MMP9,MMP12,MMP13	5/110
10_Member	GO Molecular Functions	GO:0008236	serine-type peptidase activity	-4.92586	-2.94725	4313,4314,4318,4321,4322,5340	MMP2,MMP3,MMP9,MMP12,MMP13,PLG	6/191
10_Member	GO Molecular Functions	GO:0005518	collagen binding	-4.49051	-2.57713	43,4318,4321,4322	ACHE,MMP9,MMP12,MMP13	4/68
10_Member	GO Molecular Functions	GO:0008237	metallopeptidase activity	-3.89606	-2.05147	4313,4314,4318,4321,4322	MMP2,MMP3,MMP9,MMP12,MMP13	5/183
10_Member	GO Molecular Functions	GO:0004175	endopeptidase activity	-3.23997	-1.49065	4313,4314,4318,4321,4322,5340	MMP2,MMP3,MMP9,MMP12,MMP13,PLG	6/388
10_Member	GO Molecular Functions	GO:0008233	peptidase activity	-2.2996	-0.626199	4313,4314,4318,4321,4322,5340	MMP2,MMP3,MMP9,MMP12,MMP13,PLG	6/597
11_Summary	GO Molecular Functions	GO:0034056	estrogen response element binding	-5.54002	-3.39761	367,2099,2100,142,196,2322,2932,5591,6714,5595,7015	AR,ESR1,ESR2,PARP1,AHR,FLT3,GSK3B,PRKDC,SRC,MAPK3,TERT	11/-
11_Member	GO Molecular Functions	GO:0034056	estrogen response element binding	-5.54002	-3.39761	367,2099,2100	AR,ESR1,ESR2	3/11
11_Member	GO Molecular Functions	GO:0061629	RNA polymerase II-specific DNA-binding transcription factor binding	-5.44863	-3.31813	142,196,367,2099,2322,2932,5591,6714	PARP1,AHR,AR,ESR1,FLT3,GSK3B,PRKDC,SRC	8/343
11_Member	GO Molecular Functions	GO:0008134	transcription factor binding	-5.38739	-3.26847	142,196,367,2099,2322,2932,5591,5595,6714,7015	PARP1,AHR,AR,ESR1,FLT3,GSK3B,PRKDC,MAPK3,SRC,TERT	10/600
11_Member	GO Molecular Functions	GO:0140297	DNA-binding transcription factor binding	-5.31448	-3.22312	142,196,367,2099,2322,2932,5591,5595,6714	PARP1,AHR,AR,ESR1,FLT3,GSK3B,PRKDC,MAPK3,SRC	9/478
11_Member	GO Molecular Functions	GO:0001223	transcription coactivator binding	-5.24771	-3.17225	196,367,2099,7015	AHR,AR,ESR1,TERT	4/44
11_Member	GO Molecular Functions	GO:0004879	nuclear receptor activity	-4.95489	-2.95252	196,367,2099,2100	AHR,AR,ESR1,ESR2	4/52
11_Member	GO Molecular Functions	GO:0098531	ligand-activated transcription factor activity	-4.92168	-2.94725	196,367,2099,2100	AHR,AR,ESR1,ESR2	4/53
11_Member	GO Molecular Functions	GO:0001091	RNA polymerase II general transcription initiation factor binding	-4.40736	-2.50104	196,367,2099	AHR,AR,ESR1	3/25
11_Member	GO Molecular Functions	GO:0030331	nuclear estrogen receptor binding	-3.81976	-1.99029	142,2099,6714	PARP1,ESR1,SRC	3/39
11_Member	GO Molecular Functions	GO:0001221	transcription coregulator binding	-3.61698	-1.81589	196,367,2099,7015	AHR,AR,ESR1,TERT	4/114
11_Member	GO Molecular Functions	GO:0140296	general transcription initiation factor binding	-3.42252	-1.6269	196,367,2099	AHR,AR,ESR1	3/53
11_Member	GO Molecular Functions	GO:0016922	nuclear receptor binding	-3.32574	-1.54611	142,2099,2322,6714	PARP1,ESR1,FLT3,SRC	4/136
11_Member	GO Molecular Functions	GO:0001098	basal transcription machinery binding	-3.24263	-1.49065	196,367,2099	AHR,AR,ESR1	3/61
11_Member	GO Molecular Functions	GO:0001099	basal RNA polymerase II transcription machinery binding	-3.24263	-1.49065	196,367,2099	AHR,AR,ESR1	3/61
11_Member	GO Molecular Functions	GO:0008013	beta-catenin binding	-2.80934	-1.07912	367,2099,2932	AR,ESR1,GSK3B	3/86
11_Member	GO Molecular Functions	GO:0005496	steroid binding	-2.5389	-0.831416	367,2099,2100	AR,ESR1,ESR2	3/107
12_Summary	GO Molecular Functions	GO:0008559	ABC-type xenobiotic transporter activity	-5.19888	-3.13364	4363,5243,9429,1080	ABCC1,ABCB1,ABCG2,CFTR	4/-
12_Member	GO Molecular Functions	GO:0008559	ABC-type xenobiotic transporter activity	-5.19888	-3.13364	4363,5243,9429	ABCC1,ABCB1,ABCG2	3/14
12_Member	GO Molecular Functions	GO:0015562	efflux transmembrane transporter activity	-5.1028	-3.06891	4363,5243,9429	ABCC1,ABCB1,ABCG2	3/15
12_Member	GO Molecular Functions	GO:0140359	ABC-type transporter activity	-5.09484	-3.06891	1080,4363,5243,9429	CFTR,ABCC1,ABCB1,ABCG2	4/48
12_Member	GO Molecular Functions	GO:0042910	xenobiotic transmembrane transporter activity	-3.88859	-2.05147	4363,5243,9429	ABCC1,ABCB1,ABCG2	3/37
12_Member	GO Molecular Functions	GO:0042626	ATPase-coupled transmembrane transporter activity	-3.88686	-2.05147	1080,4363,5243,9429	CFTR,ABCC1,ABCB1,ABCG2	4/97
12_Member	GO Molecular Functions	GO:0015399	primary active transmembrane transporter activity	-3.01163	-1.27196	1080,4363,5243,9429	CFTR,ABCC1,ABCB1,ABCG2	4/165
12_Member	GO Molecular Functions	GO:0008514	organic anion transmembrane transporter activity	-2.30947	-0.631948	1080,4363,5243,9429	CFTR,ABCC1,ABCB1,ABCG2	4/258
13_Summary	GO Molecular Functions	GO:0009055	electron transfer activity	-4.82213	-2.86378	231,1544,1588,4129,50507,4128,7498	AKR1B1,CYP1A2,CYP19A1,MAOB,NOX4,MAOA,XDH	7/-
13_Member	GO Molecular Functions	GO:0009055	electron transfer activity	-4.82213	-2.86378	231,1544,1588,4129,50507	AKR1B1,CYP1A2,CYP19A1,MAOB,NOX4	5/117
13_Member	GO Molecular Functions	GO:0050660	flavin adenine dinucleotide binding	-4.05102	-2.19115	4128,4129,7498,50507	MAOA,MAOB,XDH,NOX4	4/88
14_Summary	GO Molecular Functions	GO:0005158	insulin receptor binding	-4.57909	-2.63625	5295,5770,6714,2534,1956,3932,50507	PIK3R1,PTPN1,SRC,FYN,EGFR,LCK,NOX4	7/-
14_Member	GO Molecular Functions	GO:0005158	insulin receptor binding	-4.57909	-2.63625	5295,5770,6714	PIK3R1,PTPN1,SRC	3/22
14_Member	GO Molecular Functions	GO:0046875	ephrin receptor binding	-4.30462	-2.41882	2534,5770,6714	FYN,PTPN1,SRC	3/27
14_Member	GO Molecular Functions	GO:0019903	protein phosphatase binding	-3.25511	-1.4909	1956,3932,5295,5770	EGFR,LCK,PIK3R1,PTPN1	4/142
14_Member	GO Molecular Functions	GO:1990782	protein tyrosine kinase binding	-2.35902	-0.664631	5295,5770,50507	PIK3R1,PTPN1,NOX4	3/124
15_Summary	GO Molecular Functions	GO:0008106	alcohol dehydrogenase (NADP+) activity	-4.51922	-2.59503	231,873,57016	AKR1B1,CBR1,AKR1B10	3/-
15_Member	GO Molecular Functions	GO:0008106	alcohol dehydrogenase (NADP+) activity	-4.51922	-2.59503	231,873,57016	AKR1B1,CBR1,AKR1B10	3/23
15_Member	GO Molecular Functions	GO:0004033	aldo-keto reductase (NADP) activity	-4.1647	-2.29206	231,873,57016	AKR1B1,CBR1,AKR1B10	3/30
15_Member	GO Molecular Functions	GO:0016616	oxidoreductase activity, acting on the CH-OH group of donors, NAD or NADP as acceptor	-2.34929	-0.659178	231,873,57016	AKR1B1,CBR1,AKR1B10	3/125
15_Member	GO Molecular Functions	GO:0016614	oxidoreductase activity, acting on CH-OH group of donors	-2.25641	-0.587088	231,873,57016	AKR1B1,CBR1,AKR1B10	3/135
16_Summary	GO Molecular Functions	GO:0016788	hydrolase activity, acting on ester bonds	-4.51559	-2.59503	43,759,760,3932,5209,5320,5321,5770,5802,8654	ACHE,CA1,CA2,LCK,PFKFB3,PLA2G2A,PLA2G4A,PTPN1,PTPRS,PDE5A	10/-
16_Member	GO Molecular Functions	GO:0016788	hydrolase activity, acting on ester bonds	-4.51559	-2.59503	43,759,760,3932,5209,5320,5321,5770,5802,8654	ACHE,CA1,CA2,LCK,PFKFB3,PLA2G2A,PLA2G4A,PTPN1,PTPRS,PDE5A	10/757
16_Member	GO Molecular Functions	GO:0052689	carboxylic ester hydrolase activity	-4.26283	-2.38366	43,759,760,5320,5321	ACHE,CA1,CA2,PLA2G2A,PLA2G4A	5/153
17_Summary	GO Molecular Functions	GO:0042562	hormone binding	-3.97595	-2.12234	367,1956,5295,7276	AR,EGFR,PIK3R1,TTR	4/-
17_Member	GO Molecular Functions	GO:0042562	hormone binding	-3.97595	-2.12234	367,1956,5295,7276	AR,EGFR,PIK3R1,TTR	4/92
18_Summary	GO Molecular Functions	GO:0051879	Hsp90 protein binding	-3.7232	-1.9053	196,1457,3791,983	AHR,CSNK2A1,KDR,CDK1	4/-
18_Member	GO Molecular Functions	GO:0051879	Hsp90 protein binding	-3.7232	-1.9053	196,1457,3791	AHR,CSNK2A1,KDR	3/42
18_Member	GO Molecular Functions	GO:0031072	heat shock protein binding	-3.39982	-1.6096	196,983,1457,3791	AHR,CDK1,CSNK2A1,KDR	4/130
19_Summary	GO Molecular Functions	GO:0035254	glutamate receptor binding	-3.66277	-1.85616	135,1813,2534	ADORA2A,DRD2,FYN	3/-
19_Member	GO Molecular Functions	GO:0035254	glutamate receptor binding	-3.66277	-1.85616	135,1813,2534	ADORA2A,DRD2,FYN	3/44
20_Summary	GO Molecular Functions	GO:0051087	protein-folding chaperone binding	-3.36233	-1.57743	983,1080,5340,7015	CDK1,CFTR,PLG,TERT	4/-
20_Member	GO Molecular Functions	GO:0051087	protein-folding chaperone binding	-3.36233	-1.57743	983,1080,5340,7015	CDK1,CFTR,PLG,TERT	4/133

## Sheet: Table6. CC
GroupID	Category	Term	Description	LogP	Log(q-value)	Genes	Symbols	InTerm_InList
1_Summary	GO Cellular Components	GO:0045121	membrane raft	-10.8668	-7.86939	1139,1956,2534,3551,3791,3932,5594,5595,5743,6714,7430,9429,1080,4915,5604,5770,50507,2322	CHRNA7,EGFR,FYN,IKBKB,KDR,LCK,MAPK1,MAPK3,PTGS2,SRC,EZR,ABCG2,CFTR,NTRK2,MAP2K1,PTPN1,NOX4,FLT3	18/-
1_Member	GO Cellular Components	GO:0045121	membrane raft	-10.8668	-7.86939	1139,1956,2534,3551,3791,3932,5594,5595,5743,6714,7430,9429	CHRNA7,EGFR,FYN,IKBKB,KDR,LCK,MAPK1,MAPK3,PTGS2,SRC,EZR,ABCG2	12/286
1_Member	GO Cellular Components	GO:0098857	membrane microdomain	-10.8492	-7.86939	1139,1956,2534,3551,3791,3932,5594,5595,5743,6714,7430,9429	CHRNA7,EGFR,FYN,IKBKB,KDR,LCK,MAPK1,MAPK3,PTGS2,SRC,EZR,ABCG2	12/287
1_Member	GO Cellular Components	GO:0044853	plasma membrane raft	-6.24689	-3.81118	1139,5594,5595,5743,6714,7430	CHRNA7,MAPK1,MAPK3,PTGS2,SRC,EZR	6/113
1_Member	GO Cellular Components	GO:0005769	early endosome	-4.75044	-2.64573	1080,1956,3791,4915,5594,5595,5604,5770	CFTR,EGFR,KDR,NTRK2,MAPK1,MAPK3,MAP2K1,PTPN1	8/428
1_Member	GO Cellular Components	GO:0005901	caveola	-4.17071	-2.28784	5594,5595,5743,6714	MAPK1,MAPK3,PTGS2,SRC	4/82
1_Member	GO Cellular Components	GO:0005925	focal adhesion	-3.8974	-2.10795	1956,5594,5595,5604,6714,7430,50507	EGFR,MAPK1,MAPK3,MAP2K1,SRC,EZR,NOX4	7/421
1_Member	GO Cellular Components	GO:0030055	cell-substrate junction	-3.83467	-2.07237	1956,5594,5595,5604,6714,7430,50507	EGFR,MAPK1,MAPK3,MAP2K1,SRC,EZR,NOX4	7/431
1_Member	GO Cellular Components	GO:0005770	late endosome	-2.83019	-1.23062	1956,5594,5595,5604,6714	EGFR,MAPK1,MAPK3,MAP2K1,SRC	5/314
1_Member	GO Cellular Components	GO:0005788	endoplasmic reticulum lumen	-2.01913	-0.61339	2322,5594,5595,5743	FLT3,MAPK1,MAPK3,PTGS2	4/313
2_Summary	GO Cellular Components	GO:1902554	serine/threonine protein kinase complex	-8.52776	-5.72408	983,1017,1019,1021,1457,1612,3551,5591,5295,7015,142,1111,196,2099	CDK1,CDK2,CDK4,CDK6,CSNK2A1,DAPK1,IKBKB,PRKDC,PIK3R1,TERT,PARP1,CHEK1,AHR,ESR1	14/-
2_Member	GO Cellular Components	GO:1902554	serine/threonine protein kinase complex	-8.52776	-5.72408	983,1017,1019,1021,1457,1612,3551,5591	CDK1,CDK2,CDK4,CDK6,CSNK2A1,DAPK1,IKBKB,PRKDC	8/136
2_Member	GO Cellular Components	GO:1902911	protein kinase complex	-8.19156	-5.51282	983,1017,1019,1021,1457,1612,3551,5591	CDK1,CDK2,CDK4,CDK6,CSNK2A1,DAPK1,IKBKB,PRKDC	8/150
2_Member	GO Cellular Components	GO:0061695	transferase complex, transferring phosphorus-containing groups	-8.04662	-5.46479	983,1017,1019,1021,1457,1612,3551,5295,5591,7015	CDK1,CDK2,CDK4,CDK6,CSNK2A1,DAPK1,IKBKB,PIK3R1,PRKDC,TERT	10/308
2_Member	GO Cellular Components	GO:0000781	chromosome, telomeric region	-5.17106	-2.93164	142,983,1017,1111,5591,7015	PARP1,CDK1,CDK2,CHEK1,PRKDC,TERT	6/173
2_Member	GO Cellular Components	GO:0000307	cyclin-dependent protein kinase holoenzyme complex	-4.82589	-2.69121	983,1017,1019,1021	CDK1,CDK2,CDK4,CDK6	4/56
2_Member	GO Cellular Components	GO:0098687	chromosomal region	-3.15967	-1.49066	142,983,1017,1111,5591,7015	PARP1,CDK1,CDK2,CHEK1,PRKDC,TERT	6/402
2_Member	GO Cellular Components	GO:0005667	transcription regulator complex	-2.60838	-1.07577	142,196,1017,1019,2099,5591	PARP1,AHR,CDK2,CDK4,ESR1,PRKDC	6/516
3_Summary	GO Cellular Components	GO:0043235	receptor complex	-6.71921	-4.21655	196,238,1139,1813,1956,2322,3551,3791,3815,4915,6850	AHR,ALK,CHRNA7,DRD2,EGFR,FLT3,IKBKB,KDR,KIT,NTRK2,SYK	11/-
3_Member	GO Cellular Components	GO:0043235	receptor complex	-6.71921	-4.21655	196,238,1139,1813,1956,2322,3551,3791,3815,4915,6850	AHR,ALK,CHRNA7,DRD2,EGFR,FLT3,IKBKB,KDR,KIT,NTRK2,SYK	11/543
4_Summary	GO Cellular Components	GO:0098794	postsynapse	-5.99634	-3.61863	135,1139,1612,1813,2534,2932,4915,4985,5802,6714,10280,140,5340,5595,4129	ADORA2A,CHRNA7,DAPK1,DRD2,FYN,GSK3B,NTRK2,OPRD1,PTPRS,SRC,SIGMAR1,ADORA3,PLG,MAPK3,MAOB	15/-
4_Member	GO Cellular Components	GO:0098794	postsynapse	-5.99634	-3.61863	135,1139,1612,1813,2534,2932,4915,4985,5802,6714,10280	ADORA2A,CHRNA7,DAPK1,DRD2,FYN,GSK3B,NTRK2,OPRD1,PTPRS,SRC,SIGMAR1	11/643
4_Member	GO Cellular Components	GO:0097060	synaptic membrane	-4.98542	-2.78379	135,140,1139,1813,4985,5802,6714,10280	ADORA2A,ADORA3,CHRNA7,DRD2,OPRD1,PTPRS,SRC,SIGMAR1	8/397
4_Member	GO Cellular Components	GO:0098978	glutamatergic synapse	-4.89207	-2.72521	135,1612,1813,2932,5340,5595,5802,6714	ADORA2A,DAPK1,DRD2,GSK3B,PLG,MAPK3,PTPRS,SRC	8/409
4_Member	GO Cellular Components	GO:0032279	asymmetric synapse	-4.56898	-2.54345	135,1612,2534,4915,4985,5802,10280	ADORA2A,DAPK1,FYN,NTRK2,OPRD1,PTPRS,SIGMAR1	7/329
4_Member	GO Cellular Components	GO:0099572	postsynaptic specialization	-4.47006	-2.47324	1612,2534,4915,4985,5802,6714,10280	DAPK1,FYN,NTRK2,OPRD1,PTPRS,SRC,SIGMAR1	7/341
4_Member	GO Cellular Components	GO:0030425	dendrite	-4.44274	-2.47324	135,140,1813,2534,2932,4129,4915,4985,6714	ADORA2A,ADORA3,DRD2,FYN,GSK3B,MAOB,NTRK2,OPRD1,SRC	9/616
4_Member	GO Cellular Components	GO:0097447	dendritic tree	-4.43182	-2.47324	135,140,1813,2534,2932,4129,4915,4985,6714	ADORA2A,ADORA3,DRD2,FYN,GSK3B,MAOB,NTRK2,OPRD1,SRC	9/618
4_Member	GO Cellular Components	GO:0098984	neuron to neuron synapse	-4.32118	-2.3828	135,1612,2534,4915,4985,5802,10280	ADORA2A,DAPK1,FYN,NTRK2,OPRD1,PTPRS,SIGMAR1	7/360
4_Member	GO Cellular Components	GO:0042734	presynaptic membrane	-4.08277	-2.21835	135,140,1813,4985,5802	ADORA2A,ADORA3,DRD2,OPRD1,PTPRS	5/167
4_Member	GO Cellular Components	GO:0150034	distal axon	-4.06779	-2.21835	1813,4915,4985,5802,6714,10280	DRD2,NTRK2,OPRD1,PTPRS,SRC,SIGMAR1	6/272
4_Member	GO Cellular Components	GO:0045211	postsynaptic membrane	-4.03302	-2.19938	135,1139,1813,4985,5802,10280	ADORA2A,CHRNA7,DRD2,OPRD1,PTPRS,SIGMAR1	6/276
4_Member	GO Cellular Components	GO:0014069	postsynaptic density	-3.73591	-1.98658	1612,2534,4915,4985,5802,10280	DAPK1,FYN,NTRK2,OPRD1,PTPRS,SIGMAR1	6/313
4_Member	GO Cellular Components	GO:0030424	axon	-3.5018	-1.7892	135,1813,2932,4915,4985,5802,6714,10280	ADORA2A,DRD2,GSK3B,NTRK2,OPRD1,PTPRS,SRC,SIGMAR1	8/648
4_Member	GO Cellular Components	GO:0098793	presynapse	-3.138	-1.49066	135,140,1813,2932,4915,4985,5802	ADORA2A,ADORA3,DRD2,GSK3B,NTRK2,OPRD1,PTPRS	7/563
4_Member	GO Cellular Components	GO:0043025	neuronal cell body	-2.72926	-1.16445	135,1813,2534,4129,5802,6714	ADORA2A,DRD2,FYN,MAOB,PTPRS,SRC	6/488
4_Member	GO Cellular Components	GO:0098839	postsynaptic density membrane	-2.63458	-1.08617	4985,5802,10280	OPRD1,PTPRS,SIGMAR1	3/99
4_Member	GO Cellular Components	GO:0043679	axon terminus	-2.48294	-0.965566	1813,4915,4985	DRD2,NTRK2,OPRD1	3/112
4_Member	GO Cellular Components	GO:0044297	cell body	-2.45657	-0.946614	135,1813,2534,4129,5802,6714	ADORA2A,DRD2,FYN,MAOB,PTPRS,SRC	6/554
4_Member	GO Cellular Components	GO:0099634	postsynaptic specialization membrane	-2.39882	-0.903345	4985,5802,10280	OPRD1,PTPRS,SIGMAR1	3/120
4_Member	GO Cellular Components	GO:0030672	synaptic vesicle membrane	-2.32059	-0.865864	1813,4985,5802	DRD2,OPRD1,PTPRS	3/128
4_Member	GO Cellular Components	GO:0044306	neuron projection terminus	-2.32059	-0.865864	1813,4915,4985	DRD2,NTRK2,OPRD1	3/128
4_Member	GO Cellular Components	GO:0099501	exocytic vesicle membrane	-2.32059	-0.865864	1813,4985,5802	DRD2,OPRD1,PTPRS	3/128
4_Member	GO Cellular Components	GO:0043204	perikaryon	-2.12252	-0.68056	1813,2534,5802	DRD2,FYN,PTPRS	3/151
4_Member	GO Cellular Components	GO:0030426	growth cone	-2.02483	-0.61339	5802,6714,10280	PTPRS,SRC,SIGMAR1	3/164
5_Summary	GO Cellular Components	GO:0031253	cell projection membrane	-5.34795	-3.02139	135,768,1813,1956,4985,6714,7430,9429,760,1080,4363,5243,1021,2534	ADORA2A,CA9,DRD2,EGFR,OPRD1,SRC,EZR,ABCG2,CA2,CFTR,ABCC1,ABCB1,CDK6,FYN	14/-
5_Member	GO Cellular Components	GO:0031253	cell projection membrane	-5.34795	-3.02139	135,768,1813,1956,4985,6714,7430,9429	ADORA2A,CA9,DRD2,EGFR,OPRD1,SRC,EZR,ABCG2	8/354
5_Member	GO Cellular Components	GO:0031256	leading edge membrane	-3.94103	-2.13734	135,1956,4985,6714,7430	ADORA2A,EGFR,OPRD1,SRC,EZR	5/179
5_Member	GO Cellular Components	GO:0045177	apical part of cell	-3.61641	-1.89191	760,1080,1956,4363,5243,7430,9429	CA2,CFTR,EGFR,ABCC1,ABCB1,EZR,ABCG2	7/468
5_Member	GO Cellular Components	GO:0016324	apical plasma membrane	-3.15967	-1.49066	1080,1956,4363,5243,7430,9429	CFTR,EGFR,ABCC1,ABCB1,EZR,ABCG2	6/402
5_Member	GO Cellular Components	GO:0031252	cell leading edge	-3.02933	-1.39477	135,1021,1956,4985,6714,7430	ADORA2A,CDK6,EGFR,OPRD1,SRC,EZR	6/426
5_Member	GO Cellular Components	GO:0001726	ruffle	-2.85447	-1.23642	1021,1956,6714,7430	CDK6,EGFR,SRC,EZR	4/182
5_Member	GO Cellular Components	GO:0032587	ruffle membrane	-2.62217	-1.08173	1956,6714,7430	EGFR,SRC,EZR	3/100
5_Member	GO Cellular Components	GO:0005884	actin filament	-2.409	-0.906343	2534,6714,7430	FYN,SRC,EZR	3/119
5_Member	GO Cellular Components	GO:0016323	basolateral plasma membrane	-2.32733	-0.865864	768,1956,4363,7430	CA9,EGFR,ABCC1,EZR	4/255
5_Member	GO Cellular Components	GO:0009925	basal plasma membrane	-2.15351	-0.705217	768,1956,4363,7430	CA9,EGFR,ABCC1,EZR	4/286
5_Member	GO Cellular Components	GO:0045178	basal part of cell	-2.05749	-0.634012	768,1956,4363,7430	CA9,EGFR,ABCC1,EZR	4/305
6_Summary	GO Cellular Components	GO:0005635	nuclear envelope	-5.17134	-2.93164	142,240,1017,1019,1956,5321,5595,5743,10280	PARP1,ALOX5,CDK2,CDK4,EGFR,PLA2G4A,MAPK3,PTGS2,SIGMAR1	9/-
6_Member	GO Cellular Components	GO:0005635	nuclear envelope	-5.17134	-2.93164	142,240,1017,1019,1956,5321,5595,5743,10280	PARP1,ALOX5,CDK2,CDK4,EGFR,PLA2G4A,MAPK3,PTGS2,SIGMAR1	9/498
6_Member	GO Cellular Components	GO:0031965	nuclear membrane	-2.83627	-1.23062	240,1019,1956,5743,10280	ALOX5,CDK4,EGFR,PTGS2,SIGMAR1	5/313
[truncated: 28 more rows]

## Sheet: Table7. KEGG
GroupID	Category	Term	Description	LogP	Log(q-value)	Genes	Symbols	InTerm_InList
[truncated: 173 more rows]
